# Supplementary material for: Comparative transcriptome analyses of different Salvia miltiorrhiza varieties during the accumulation of tanshinones
Source: PeerJ. 2021 Oct 20;9:e12300. doi: 10.7717/peerj.12300 (PMC8541307; doi:10.7717/peerj.12300)
Supplement: Supplemental Information 6 [file peerj-09-12300-s006.xlsx]

## Sheet: Sheet1
Table S1. Primers for qRT-PCR
Gene ID	Forward primer	Reverse primer	Gene Syboml	Validation Stages
Unigene0057660	CCATCTACTCTCGTCCCAAAAC	AACAATATGACCCTCTGCCC	HMGS	S1, S2
Unigene0054560	GGGCAAGAATCTGTACATGAGG	GGAACTGGTTGACGAGGAAG	HMGR2	S1, S2
Unigene0068709	CGCCAAAATCGAAGGGTATCTC	TGAGATGGGTGAAGTGATGC	CYP76AH1	S1, S2
Unigene0007189	GACAGATACACCAGACACCAG	TTTGCTGGTTAGGTTGGAGAG	CPS	S1, S2
Unigene0043107	GTATCCGCACAAAATCCTGAC	GAACCCTGCTAGTCCGAAAG	SmDXS	S1, S2
Unigene0008759	TGCTTTCGAGTGGACTGATG	CCTCGGTTTAATTTCCCTCCAG	FPPS	S1
Unigene0068845	TCTGAATGCTGGAATCTTCGG	AGGAGTGACGTTGTGGTTG	PAL	S1
Unigene0068999	ATCGCCTACTCCAAGTTCAAG	GGGATGTGGAGCTTAGTCTTC	RAS	S1
Unigene0011371	AAAACTCACCACCCTCATCC	TCTGATTTCGGACACCCATG	ERF	S1
Unigene0030713	GAAGCTCTCAACTCTCCGAC	ATCGCTTGCCCTTGGAC	bZIP	S1
Unigene0055056	ATGTCCAACCTCATGTTCGG	TTGCGTCTGAGTCCTTGTG	CYP76AK5	S2
Unigene0011615	TTCCCAGGCAGAAGTATTGTG	TCTGTGGTAGTCATGGTTTGG	SmISPG	S2
Unigene0007502	GGCGTGGAAAATCAGTTGTATG	ACCAAGAGCACCAGCAATAG	SmHMGR3	S2
Unigene0006798	AACTGCACCCGAGAATAAGAG	TCATCTCAACCAGCACATCC	SmMYC	S2
Unigene0006621	AAGAGCTGCAGGTTGAGATG	GTAACTGAGATGCTATGACCGAC	SmMYB36	S2
