# Supplementary material for: Comparative transcriptome analyses of different Salvia miltiorrhiza varieties during the accumulation of tanshinones
Source: PeerJ. 2021 Oct 20;9:e12300. doi: 10.7717/peerj.12300 (PMC8541307; doi:10.7717/peerj.12300)
Supplement: Supplemental Information 9 [file peerj-09-12300-s009.xlsx]

## Sheet: Sheet1
Table S4. Summary of RNA-Seq data and mapping metrics.
Group	Sample_ID	RawData (Gb)	CleanData (Gb)	GC content	%≥Q30	Mapping ratio
					(%)	(%)
SC	SC1-1	6.93	6.75	0.4715	0.9325	0.8396
	SC1-2	6.96	6.79	0.4731	0.9397	0.8236
	SC1-3	6.4	6.25	0.4905	0.9311	0.8616
	SC2-1	5.44	5.32	0.4532	0.9283	0.8745
	SC2-2	5.49	5.39	0.4346	0.9286	0.8594
	SC2-3	5.38	5.27	0.473	0.9345	0.8262
YN	YN1-1	6.46	6.28	0.4617	0.928	0.7522
	YN1-2	6.05	5.91	0.4573	0.9302	0.7841
	YN1-3	6.54	6.34	0.4773	0.9291	0.8378
	YN2-1	5.65	5.49	0.4904	0.9301	0.8696
	YN2-2	6.95	6.81	0.4771	0.9333	0.8524
	YN2-3	6.77	6.57	0.4766	0.9286	0.8488
SX	SX1-1	7.35	7.08	0.4787	0.9403	0.8274
	SX1-2	6.92	6.63	0.4715	0.9409	0.8373
	SX1-3	7.17	6.87	0.4798	0.942	0.8895
	SX2-1	7.11	6.68	0.4608	0.9312	0.8586
	SX2-2	6.42	6.16	0.4691	0.9382	0.8818
	SX2-3	8.08	7.68	0.4679	0.9433	0.8578
HN	HN1-1	6.74	6.45	0.4718	0.9367	0.8065
	HN1-2	7.86	7.5	0.4689	0.9423	0.7802
	HN1-3	6.8	6.5	0.4791	0.9428	0.8119
	HN2-1	6.44	6.1	0.4804	0.9354	0.8532
	HN2-2	6.3	6.05	0.4533	0.9394	0.8761
	HN2-3	6.75	6.42	0.4926	0.9346	0.8687
