# Supplementary material for: Comparative transcriptome analyses of different Salvia miltiorrhiza varieties during the accumulation of tanshinones
Source: PeerJ. 2021 Oct 20;9:e12300. doi: 10.7717/peerj.12300 (PMC8541307; doi:10.7717/peerj.12300)
Supplement: Supplemental Information 10 [file peerj-09-12300-s010.xlsx]

## Sheet: Table S3. Expression of 52,216 
Table S5. Expression of 52,216 Unigenes with FPKM above 1
ID	SC2	YN2	SX2	HN2	SC1	YN1	SX1	HN1	Symbol	Description	KEGG_A_class	KEGG_B_class	Pathway	K_ID	GO.Component	GO.Function	GO.Process
Unigene0000001	0.653	0.033	0	1.167	0.757	0.513	0.32	1.393	--	-	-	-	-	-	-	-	-
Unigene0000002	0.22	17.617	13.84	0.453	0.37	2.95	4.533	6.193	lec-1	-	-	-	-	-	-	-	-
Unigene0000003	17.033	8.063	4.137	29.047	20.167	7.353	0	23.963	--	-	-	-	-	-	-	-	-
Unigene0000004	0.35	0.28	0.68	0.24	0.117	0.31	0.21	0.16	--	-	-	-	-	-	-	-	-
Unigene0000005	1.277	0.073	1.667	0	1.947	0.217	1.487	0	R1B-14	disease resistance RPP8-like protein 3 isoform X2 [Olea europaea var. sylvestris] [Olea europaea]	-	-	-	-	-	-	-
Unigene0000006	0.217	0.257	0.543	0.93	0.113	0.33	0.153	0.62	--	-	-	-	-	-	-	-	-
Unigene0000007	0.933	3.6	3.123	0	0.15	2.407	1.697	0	--	-	-	-	-	-	-	-	-
Unigene0000008	0.463	6.687	3.45	0.157	1.27	2.573	0.93	2.267	--	-	-	-	-	-	-	-	-
Unigene0000009	0.647	11.717	4.277	0.323	1.943	4.237	1.183	4.147	MAST2	microtubule-associated serine/threonine-protein kinase 2-like [Rhodamnia argentea]	-	-	-	-	GO:0043229//intracellular organelle	GO:0004672//protein kinase activity;GO:0097159//organic cyclic compound binding;GO:1901363//heterocyclic compound binding	GO:0000904//cell morphogenesis involved in differentiation;GO:0003006//developmental process involved in reproduction;GO:0009664//plant-type cell wall organization;GO:0040007//growth
Unigene0000010	1.213	0.283	3.58	3.803	0.763	0.193	5.783	1.927	--	Apoptotic ATPase [Handroanthus impetiginosus]	-	-	-	-	-	-	-
Unigene0000011	1.98	0.823	1.367	1.973	1.09	1.027	0	1.357	--	-	-	-	-	-	-	-	-
Unigene0000012	4.913	4.553	16.42	10.393	3.613	5.627	11.23	8.557	--	-	-	-	-	-	-	-	-
Unigene0000013	3.433	1.613	3.237	6.44	4.083	1.75	3.127	5.23	--	-	-	-	-	-	-	-	-
Unigene0000014	4.19	0.933	3.203	4.77	1.923	1.437	3.293	4.133	--	Cysteine/Histidine-rich C1 domain family protein [Arabidopsis thaliana]	-	-	-	-	-	-	GO:0006812//cation transport;GO:0006950//response to stress;GO:0009987//cellular process;GO:0015833//peptide transport;GO:0046942//carboxylic acid transport;GO:0048364//root development
Unigene0000015	0.793	9.62	5.517	0.443	2.537	4.277	1.487	5.057	Ubr5	E3 ubiquitin-protein ligase UPL2-like isoform X2 [Cucurbita maxima]	-	-	-	-	-	-	-
Unigene0000016	0.303	6.483	1.593	0.203	1.523	2.613	0.51	2.403	Mer	moesin/ezrin/radixin homolog 1-like [Rhodamnia argentea]	-	-	-	-	-	-	-
Unigene0000017	0.443	5.597	3.107	0.253	1.47	2.527	1.03	2.993	GCN1	PREDICTED: eIF-2-alpha kinase activator GCN1 [Oryza brachyantha]	-	-	-	-	GO:0043231//intracellular membrane-bounded organelle;GO:0044444//cytoplasmic part	-	GO:0009617//response to bacterium;GO:0044267//cellular protein metabolic process
Unigene0000018	0.68	0.03	0.48	0.733	1.183	0	0.96	0.873	--	-	-	-	-	-	-	-	-
Unigene0000019	0.357	5.62	2.657	0.093	1.187	1.88	0.653	2.11	Usp7	ubiquitin carboxyl-terminal hydrolase 7-like, partial [Rhodamnia argentea]	-	-	-	-	-	-	-
Unigene0000020	9.483	5.81	6.193	8.257	7.98	3.857	7.073	6.767	HPT1	homogentisate phytyltransferase / homogentisate geranylgeranyltransferase [Salvia splendens]	Metabolism;Metabolism;Metabolism	Global and overview maps;Global and overview maps;Metabolism of cofactors and vitamins	ko01100//Metabolic pathways;ko01110//Biosynthesis of secondary metabolites;ko00130//Ubiquinone and other terpenoid-quinone biosynthesis	K09833;K09833;K09833	GO:0031224//intrinsic component of membrane;GO:0044434//chloroplast part	GO:0010354//homogentisate prenyltransferase activity	GO:0006090//pyruvate metabolic process;GO:0006355//regulation of transcription, DNA-templated;GO:0006544//glycine metabolic process;GO:0006633//fatty acid biosynthetic process;GO:0006732//coenzyme metabolic process;GO:0006753//nucleoside phosphate metabolic process;GO:0006775//fat-soluble vitamin metabolic process;GO:0006778//porphyrin-containing compound metabolic process;GO:0006790//sulfur comp…
Unigene0000021	0.467	9.503	6.92	0.307	1.663	3.543	1.447	4.047	TBCK	TBCK protein kinase [Capsaspora owczarzaki ATCC 30864]	-	-	-	-	-	-	-
Unigene0000022	2.773	0	0	5.643	4.517	0	0.027	4.953	AAPT2	choline/ethanolaminephosphotransferase 1 [Cucumis melo var. makuwa] [Cucumis melo]	Metabolism;Metabolism;Metabolism;Metabolism;Metabolism	Global and overview maps;Global and overview maps;Lipid metabolism;Lipid metabolism;Metabolism of other amino acids	ko01100//Metabolic pathways;ko01110//Biosynthesis of secondary metabolites;ko00564//Glycerophospholipid metabolism;ko00565//Ether lipid metabolism;ko00440//Phosphonate and phosphinate metabolism	K00993;K00993;K00993;K00993;K00993	-	-	-
Unigene0000023	2.82	1.547	7.79	3.523	1.26	1.407	0	2.05	OPT3	Pg7880, partial [Cenchrus americanus]	-	-	-	-	-	-	-
Unigene0000025	2.533	0.613	9.577	4.47	4.313	0.627	14.16	4.073	--	DNA mismatch repair protein Msh3-like [Chenopodium quinoa]	-	-	-	-	-	-	-
Unigene0000026	0.587	0.037	0.223	1.09	1.743	0.107	0.7	1.517	TY3B-I	DNA/RNA polymerases superfamily protein [Cucumis melo var. makuwa] [Cucumis melo]	-	-	-	-	-	GO:0046872//metal ion binding	GO:0043170//macromolecule metabolic process;GO:0044238//primary metabolic process
Unigene0000027	32.797	14.49	27.99	30.24	32.083	17.22	27.01	25.873	CCT3	T-complex protein 1 subunit gamma [Salvia splendens]	-	-	-	-	GO:0044444//cytoplasmic part	GO:0001871//pattern binding;GO:0004672//protein kinase activity;GO:0005515//protein binding;GO:0032550//purine ribonucleoside binding;GO:0046872//metal ion binding	GO:0006464//cellular protein modification process;GO:0006796//phosphate-containing compound metabolic process;GO:0016072//rRNA metabolic process
Unigene0000028	1.213	0.127	1.52	0.607	1.223	0.18	1.087	0.733	--	-	-	-	-	-	-	-	-
Unigene0000029	2.287	0.453	1.963	2.76	3.727	0.263	1.643	3.7	R1B-16	disease resistance RPP8-like protein 3 isoform X2 [Olea europaea var. sylvestris] [Olea europaea]	-	-	-	-	-	-	-
Unigene0000030	0	1.15	0.463	0	0.077	0.267	0.277	0.237	--	-	-	-	-	-	-	-	-
Unigene0000031	7.953	3.317	5.73	4.97	6.417	3.113	5.89	4.933	At2g16880	pentatricopeptide repeat protein [Salvia miltiorrhiza]	-	-	-	-	-	-	-
Unigene0000032	0	0	1.643	0.033	0	0	1.5	0.037	--	-	-	-	-	-	-	-	-
Unigene0000033	0	2.33	0	0	0	4.53	0	0	--	-	-	-	-	-	-	-	-
Unigene0000034	3.237	4.187	4.343	4.763	2.143	4.193	2.84	3.097	--	pentatricopeptide repeat protein [Salvia miltiorrhiza]	-	-	-	-	-	-	-
Unigene0000035	0.737	9.393	4.78	0.583	2.16	4.54	1.753	4.577	--	-	-	-	-	-	-	-	-
Unigene0000036	0.417	7.64	3.967	0.313	1.84	3.14	0.91	3.477	ptrn-1	hypothetical protein KFL_000770250 [Klebsormidium nitens]	-	-	-	-	-	-	-
Unigene0000037	0.18	2.963	1.517	0.153	0.627	1.393	0.343	1.66	ptrn-1	-	-	-	-	-	-	-	-
Unigene0000038	0	0	1.413	0	0	0	3.167	0.017	--	-	-	-	-	-	-	-	-
Unigene0000039	61.1	24.067	25.87	23.633	27.033	20.43	27.807	17.04	NPF6.1	PREDICTED: LOW QUALITY PROTEIN: protein NRT1/ PTR FAMILY 6.1 [Capsicum annuum]	-	-	-	-	GO:0016020//membrane;GO:0044464//cell part	-	-
Unigene0000040	1.73	0.69	1.46	0.797	0.363	0.287	0.613	0.367	--	BnaCnng12640D [Brassica napus]	-	-	-	-	-	-	-
Unigene0000041	13.58	5.43	11.94	10.287	10.163	5.307	10.55	8.327	At3g25440	uncharacterized CRM domain-containing protein At3g25440, chloroplastic isoform X1 [Olea europaea var. sylvestris] [Olea europaea]	Genetic Information Processing	Folding, sorting and degradation	ko03018//RNA degradation	K01148	GO:0009536//plastid	GO:0016410//N-acyltransferase activity;GO:0046872//metal ion binding	GO:0000038//very long-chain fatty acid metabolic process
Unigene0000042	1.577	2.477	0.867	1.713	2.017	0.377	1.047	1.237	ROG1	alpha/beta-Hydrolases superfamily protein [Artemisia annua]	-	-	-	-	-	-	-
Unigene0000043	1.837	0.743	1.55	1.37	1.553	0.8	3.227	1.303	--	-	-	-	-	-	-	-	-
Unigene0000044	14.857	1.293	4.057	6.967	16.517	2.27	5.72	12.193	RLK902	probable inactive receptor kinase At1g48480 [Coffea arabica]	-	-	-	-	GO:0031224//intrinsic component of membrane	GO:0004672//protein kinase activity;GO:0016628//oxidoreductase activity, acting on the CH-CH group of donors, NAD or NADP as acceptor;GO:0032550//purine ribonucleoside binding	GO:0006464//cellular protein modification process;GO:0006796//phosphate-containing compound metabolic process;GO:0044710//single-organism metabolic process
Unigene0000045	0.03	0.917	0.507	0.167	0.937	0.833	0.24	1.557	LAMA1	laminin subunit beta-2-like [Rhodamnia argentea]	-	-	-	-	-	-	-
Unigene0000046	0.3	5.88	2.307	0.127	0.983	2.167	0.83	2.163	nsy-1	mitogen-activated protein kinase kinase kinase nsy-1-like [Rhodamnia argentea]	Environmental Information Processing	Signal transduction	ko04016//MAPK signaling pathway - plant	K20606	-	GO:0016301//kinase activity	GO:0006259//DNA metabolic process;GO:0006468//protein phosphorylation;GO:0034645//cellular macromolecule biosynthetic process;GO:0044710//single-organism metabolic process;GO:0044763//single-organism cellular process;GO:0050794//regulation of cellular process
Unigene0000047	46.5	0.017	0.02	35.57	99.107	0.027	0.02	32.897	--	ubiquitin domain-containing protein DSK2b-like isoform X2 [Brassica napus]	-	-	-	-	-	-	-
Unigene0000048	0.893	0.67	1.403	1.743	0.47	0.713	1.6	0.947	--	-	-	-	-	-	-	-	-
Unigene0000049	1.033	14.753	5.457	0.683	3.597	5.437	1.753	6.683	SLC8A3	Sodium/calcium exchanger 1 [Hondaea fermentalgiana]	-	-	-	-	GO:0031090//organelle membrane	GO:0015298//solute:cation antiporter activity	GO:0000041//transition metal ion transport;GO:0044763//single-organism cellular process;GO:0070838//divalent metal ion transport
Unigene0000050	0.517	0.51	0.223	0.94	0.637	0.257	0	0.41	--	-	-	-	-	-	-	-	-
Unigene0000051	0.37	9.51	3.757	0.18	1.12	3.063	0.867	2.48	CDC23	anaphase-promoting complex subunit 8-like [Trebouxia sp. A1-2]	Genetic Information Processing	Folding, sorting and degradation	ko04120//Ubiquitin mediated proteolysis	K03355	-	-	GO:0022402//cell cycle process;GO:0044238//primary metabolic process;GO:0044260//cellular macromolecule metabolic process;GO:0044710//single-organism metabolic process;GO:0050794//regulation of cellular process
Unigene0000052	25.733	0.52	1.857	0.307	8.587	0.477	0.147	0.083	--	-	-	-	-	-	-	-	-
Unigene0000053	35.09	10.32	41.807	19.12	32.807	17.437	45.88	23.58	PIP2-7	aquaporin PIP [Salvia splendens]	-	-	-	-	GO:0031224//intrinsic component of membrane	-	GO:0051234//establishment of localization
Unigene0000054	0	4.467	0.037	0	0	0	0	0	ACT1	actin, partial [Rhodomonas salina]	-	-	-	-	GO:0005911//cell-cell junction;GO:0009526//plastid envelope;GO:0009532//plastid stroma;GO:0016020//membrane;GO:0030312//external encapsulating structure;GO:0043232//intracellular non-membrane-bounded organelle	GO:0032550//purine ribonucleoside binding;GO:0046914//transition metal ion binding	GO:0000904//cell morphogenesis involved in differentiation;GO:0006006//glucose metabolic process;GO:0006970//response to osmotic stress;GO:0007010//cytoskeleton organization;GO:0010038//response to metal ion;GO:0016192//vesicle-mediated transport;GO:0048588//developmental cell growth;GO:0051603//proteolysis involved in cellular protein catabolic process
Unigene0000055	93.663	4.15	41.13	41.35	83.213	39.357	42.053	68.357	GT4	UDP-glycosyltransferase 91C1 [Sesamum indicum]	-	-	-	-	-	GO:0016757//transferase activity, transferring glycosyl groups	-
Unigene0000056	13.133	144.097	7.813	11.917	7.897	18.417	16.74	10.28	HMT3	homocysteine S-methyltransferase [Salvia splendens]	Metabolism;Metabolism;Metabolism	Global and overview maps;Global and overview maps;Amino acid metabolism	ko01100//Metabolic pathways;ko01110//Biosynthesis of secondary metabolites;ko00270//Cysteine and methionine metabolism	K00547;K00547;K00547	-	-	-
Unigene0000057	0.247	0.087	0.45	0.073	0.703	0.1	0.11	0.28	--	-	-	-	-	-	-	-	-
Unigene0000058	5.26	2.233	3.737	5.1	5.37	2.64	4.177	4.583	--	-	-	-	-	-	-	-	-
Unigene0000059	199.65	2.443	34.927	26.69	154.157	187.993	27.98	33.47	CDS	terpene synthase 5 [Prunella vulgaris]	Metabolism	Metabolism of terpenoids and polyketides	ko00909//Sesquiterpenoid and triterpenoid biosynthesis	K15803	GO:0044424//intracellular part	GO:0010334//sesquiterpene synthase activity;GO:0046872//metal ion binding	GO:0006644//phospholipid metabolic process;GO:0006721//terpenoid metabolic process;GO:0046246//terpene biosynthetic process
Unigene0000060	1.63	0.463	0.703	0.68	0.96	0.14	0.657	0.34	--	PREDICTED: coiled-coil domain-containing protein 25 [Beta vulgaris subsp. vulgaris] [Beta vulgaris]	-	-	-	-	GO:0044424//intracellular part	-	GO:0006605//protein targeting
Unigene0000061	1.753	0.377	0.86	0.6	1.387	0.563	0.5	0.813	--	-	-	-	-	-	-	-	-
Unigene0000062	0.037	1.71	9.78	0.063	0.017	2.527	22.807	0.073	GRF3	telomeric repeat binding protein [Striga asiatica]	-	-	-	-	-	-	-
Unigene0000063	0.87	3.8	2.13	0.413	1.637	4.297	0.547	3.563	cpg-4	-	-	-	-	-	-	-	-
Unigene0000064	2.943	111.093	9.18	0.557	6.677	15.62	2.06	8.637	--	-	-	-	-	-	-	-	-
Unigene0000065	0.563	8.033	3.467	0.32	1.73	3.533	1.073	2.96	unc-51	serine/threonine-protein kinase unc-51-like [Rhodamnia argentea]	Cellular Processes	Transport and catabolism	ko04136//Autophagy - other eukaryotes	K08269	-	-	-
Unigene0000066	0.257	3.747	1.81	0.113	0.727	1.253	0.547	1.14	Efl1	elongation factor-like GTPase 1 [Rhodamnia argentea]	Genetic Information Processing	Translation	ko03008//Ribosome biogenesis in eukaryotes	K14536	-	-	-
Unigene0000067	15706.4	120.23	23746.1	48461.2	17892.7	22122	18218.8	36288.5	FRIL	lectin 1 [Ocimum basilicum]	-	-	-	-	-	GO:0016772//transferase activity, transferring phosphorus-containing groups;GO:0030246//carbohydrate binding	GO:0044238//primary metabolic process;GO:0044260//cellular macromolecule metabolic process;GO:0044763//single-organism cellular process;GO:0050794//regulation of cellular process;GO:0050896//response to stimulus
Unigene0000068	7320.5	55.42	10507	20340	6754.99	8239.39	7217.42	13230.1	LECA	lectin 1 [Ocimum basilicum]	-	-	-	-	-	GO:0016772//transferase activity, transferring phosphorus-containing groups;GO:0046872//metal ion binding	GO:0009987//cellular process;GO:0050896//response to stimulus
Unigene0000069	0.73	8.253	4.403	0.323	2.227	3.253	1.063	4.083	C28H8.3	uncharacterized helicase C694.02-like [Quercus suber]	-	-	-	-	GO:0044424//intracellular part	GO:0005488//binding;GO:0016818//hydrolase activity, acting on acid anhydrides, in phosphorus-containing anhydrides	GO:0003006//developmental process involved in reproduction;GO:0006396//RNA processing;GO:0006464//cellular protein modification process;GO:0006996//organelle organization;GO:0009653//anatomical structure morphogenesis;GO:0009791//post-embryonic development;GO:0010468//regulation of gene expression;GO:0042221//response to chemical;GO:0044710//single-organism metabolic process;GO:0044763//single-or…
Unigene0000070	1.167	16.08	5.81	0.507	2.633	4.85	1.707	4.82	--	-	-	-	-	-	-	-	-
Unigene0000071	0.32	3.937	2.08	0.263	0.883	1.483	0.507	1.613	--	-	-	-	-	-	-	-	-
Unigene0000072	0.53	7.28	4.163	0.35	1.247	3.277	0.89	3.11	BRD7	bromodomain-containing protein [Striga asiatica]	-	-	-	-	-	-	GO:0016070//RNA metabolic process
Unigene0000073	0.127	3.673	1.353	0.083	0.483	1.227	0.487	1.227	RALGAPB	hypothetical protein CAOG_05066 [Capsaspora owczarzaki ATCC 30864]	-	-	-	-	-	-	-
Unigene0000074	38.033	11.78	24.267	20.32	26.947	20.773	41.07	20.327	FZR3	Anaphase promoting complex, Cdc20, Cdh1, and Ama1 subunits [Handroanthus impetiginosus]	Genetic Information Processing	Folding, sorting and degradation	ko04120//Ubiquitin mediated proteolysis	K03364	GO:0043231//intracellular membrane-bounded organelle;GO:0043234//protein complex	GO:0005488//binding	GO:0000280//nuclear division;GO:0001558//regulation of cell growth;GO:0006305//DNA alkylation;GO:0006511//ubiquitin-dependent protein catabolic process;GO:0007017//microtubule-based process;GO:0008283//cell proliferation;GO:0010564//regulation of cell cycle process;GO:0016458//gene silencing;GO:0032446//protein modification by small protein conjugation;GO:0034968//histone lysine methylation;GO:00…
Unigene0000075	28.813	6.987	21.06	33.243	42.82	21.753	30.38	41.323	--	NHL domain-containing protein [Striga asiatica]	-	-	-	-	-	-	-
Unigene0000076	0.337	4.387	2.433	0.287	1.05	2.177	0.677	1.71	CLPX	ATP-dependent protease ATP-binding subunit [Capsaspora owczarzaki ATCC 30864]	-	-	-	-	GO:0005739//mitochondrion	GO:0016787//hydrolase activity	GO:0009987//cellular process;GO:0044238//primary metabolic process;GO:0044699//single-organism process;GO:0071704//organic substance metabolic process
Unigene0000077	0.523	0.163	1.203	0.203	0.633	0.383	0.387	0.313	--	-	-	-	-	-	-	-	-
Unigene0000078	0.537	0.173	0.697	0.48	0.853	0.273	0.633	0.6	ycf2-A	Protein Ycf2 [Morella rubra]	-	-	-	-	GO:0009536//plastid	-	-
Unigene0000079	0.313	5.663	2.697	0.253	1.027	2.527	0.87	2.41	unc45b	protein unc-45 homolog B-like [Rhodamnia argentea]	-	-	-	-	-	-	-
Unigene0000080	0.593	0.1	0.627	1.053	0.527	0.267	0.26	0.5	--	-	-	-	-	-	-	-	-
Unigene0000081	2.05	0	0.89	1.923	1.537	0	0	1.123	--	DUF493 domain-containing protein [Gossypium australe]	-	-	-	-	-	-	-
Unigene0000082	9.323	4.513	7.5	7.447	7.1	3.647	7.053	6.173	AAAS	aladin [Salvia splendens]	Genetic Information Processing	Translation	ko03013//RNA transport	K14320	GO:0043231//intracellular membrane-bounded organelle	-	GO:0003006//developmental process involved in reproduction;GO:0016571//histone methylation;GO:0048580//regulation of post-embryonic development
Unigene0000083	4.807	3.727	5.473	4.16	4.24	3.097	5.803	3.87	FANCM	PREDICTED: Transposase MuDR plant [Prunus dulcis]	-	-	-	-	-	GO:0046914//transition metal ion binding	-
Unigene0000085	1.567	0.05	5.15	2.51	1.793	0.153	3.157	1.373	--	-	-	-	-	-	-	-	-
Unigene0000086	0.13	3.217	1.267	0.113	0.633	1.41	0.357	1.66	let-363	serine/threonine-protein kinase mTOR-like [Rhodamnia argentea]	Cellular Processes	Transport and catabolism	ko04136//Autophagy - other eukaryotes	K07203	-	-	-
Unigene0000087	0.81	12.933	7.323	0.343	3.06	5.923	2.037	5.69	--	-	-	-	-	-	-	-	-
Unigene0000088	3.94	1.687	3.853	2.94	2.447	2.03	2.303	2.013	RGA1	Apoptotic ATPase [Handroanthus impetiginosus]	-	-	-	-	-	-	-
Unigene0000089	1.99	0.73	0.907	0.207	1.203	1.103	0.563	0.43	RGA3	Apoptotic ATPase [Handroanthus impetiginosus]	-	-	-	-	-	-	GO:0008152//metabolic process
Unigene0000090	0.133	0	1.15	0.05	0.05	0.047	1.253	0.107	--	-	-	-	-	-	-	-	-
Unigene0000091	0.247	0.413	0.557	0.173	0.58	1.07	0.897	0.19	--	-	-	-	-	-	-	-	-
Unigene0000092	0.017	0	6.527	0.057	0	0	12.56	0.147	--	TdcA1-ORF2, partial [Daucus carota]	-	-	-	-	-	-	-
Unigene0000093	0.693	0.587	0.823	0.43	1.443	2.087	3.02	1.18	FDM1	PREDICTED: factor of DNA methylation 1-like [Erythranthe guttata]	-	-	-	-	-	-	-
Unigene0000094	4.177	5.64	5.847	6.347	5.543	2.633	10.407	4.18	--	PREDICTED: uncharacterized protein LOC107759331 [Nicotiana tabacum]	-	-	-	-	-	-	-
Unigene0000095	2.077	0.227	3.507	0	0.49	0.533	1.17	0	--	Apoptotic ATPase [Handroanthus impetiginosus]	-	-	-	-	-	-	-
Unigene0000096	0.557	0.347	0.253	0.353	0.463	0.24	0.477	0.157	--	PREDICTED: ankyrin-1-like [Erythranthe guttata]	-	-	-	-	-	-	-
Unigene0000097	1.4	1.827	4.713	3.027	2.81	3.147	3.807	2.797	CDC48C	ribosome biogenesis ATPase [Salvia splendens]	Genetic Information Processing	Translation	ko03008//Ribosome biogenesis in eukaryotes	K14571	GO:0044424//intracellular part	-	GO:0006396//RNA processing;GO:0006464//cellular protein modification process;GO:0010468//regulation of gene expression;GO:0044763//single-organism cellular process
Unigene0000098	0.33	0.143	0.267	0.217	0.683	0.22	0.12	0.26	--	Apoptotic ATPase [Handroanthus impetiginosus]	-	-	-	-	-	-	-
Unigene0000099	1.823	2.277	0.967	1.18	1.32	0.913	1.317	1.313	--	Apoptotic ATPase [Handroanthus impetiginosus]	-	-	-	-	-	-	-
Unigene0000100	1.55	0.34	0.627	0.793	0.527	0.773	1.247	0.48	--	Apoptotic ATPase [Handroanthus impetiginosus]	-	-	-	-	-	-	-
Unigene0000102	0	1.12	0.077	0.06	0.12	0.827	0.057	0	--	-	-	-	-	-	-	-	-
Unigene0000103	0.843	0.21	0.333	1.293	0.487	0.2	0.623	0.713	--	-	-	-	-	-	-	-	-
Unigene0000104	1.95	0.123	0	2.1	3.173	0.093	0	1.88	--	-	-	-	-	-	-	-	-
Unigene0000105	8.14	14.83	4.457	4.863	6.647	5.087	5.37	4.043	At5g01750	PREDICTED: protein LURP-one-related 10-like [Erythranthe guttata]	-	-	-	-	GO:0009536//plastid	-	GO:0006568//tryptophan metabolic process;GO:0006873//cellular ion homeostasis;GO:0009267//cellular response to starvation;GO:0009683//indoleacetic acid metabolic process;GO:0030001//metal ion transport
Unigene0000106	9.623	3.567	8.943	7.737	10.067	6.007	9.62	8.853	--	Protein-disulfide reductase [Handroanthus impetiginosus]	-	-	-	-	GO:0009536//plastid	-	GO:0009648//photoperiodism
Unigene0000107	1.11	0.237	0.02	2.15	1.167	0.067	0	1.633	AtMg01250	ribonuclease H [Trifolium pratense]	-	-	-	-	-	-	-
Unigene0000108	0.827	0.117	0.927	0.71	0.507	0.593	0.91	0.457	--	-	-	-	-	-	-	-	-
Unigene0000109	1.357	0.533	2.543	1.887	1.407	0.893	2.037	1.323	--	-	-	-	-	-	-	-	-
Unigene0000110	4.077	2.923	5.64	5.44	4.53	3.547	6.74	5.987	PRH	PREDICTED: homeobox protein HAT3.1 [Erythranthe guttata]	-	-	-	-	-	GO:0005488//binding	GO:0044238//primary metabolic process;GO:0044260//cellular macromolecule metabolic process
Unigene0000111	0	0.08	1.513	0	0	0	0.497	0	--	-	-	-	-	-	-	-	-
Unigene0000112	0.103	0.037	0.783	0.067	0.79	0.12	1.767	0.247	--	-	-	-	-	-	-	-	-
Unigene0000113	2.897	0.92	8.763	5.06	1.497	2.563	11.32	3.263	F3H-3	protein DOWNY MILDEW RESISTANCE 6 isoform X1 [Sesamum indicum]	-	-	-	-	-	GO:0051213//dioxygenase activity	GO:0009628//response to abiotic stimulus
Unigene0000114	46.97	11.86	18.66	29.83	36.483	11.913	29.08	29	VATE	V-type proton ATPase subunit E [Sesamum indicum]	Metabolism;Metabolism;Cellular Processes	Global and overview maps;Energy metabolism;Transport and catabolism	ko01100//Metabolic pathways;ko00190//Oxidative phosphorylation;ko04145//Phagosome	K02150;K02150;K02150	GO:0005774//vacuolar membrane;GO:0005840//ribosome;GO:0016469//proton-transporting two-sector ATPase complex	GO:0015078//hydrogen ion transmembrane transporter activity	GO:0003006//developmental process involved in reproduction;GO:0006090//pyruvate metabolic process;GO:0006754//ATP biosynthetic process;GO:0006970//response to osmotic stress;GO:0006996//organelle organization;GO:0009617//response to bacterium;GO:0009725//response to hormone;GO:0010038//response to metal ion;GO:0015988//energy coupled proton transmembrane transport, against electrochemical gradien…
Unigene0000115	2.053	0.26	0.337	1.69	1.267	0.073	0.11	1.017	--	-	-	-	-	-	-	-	-
Unigene0000116	13.69	2.207	7.33	29.11	16.22	4.577	7.303	31.03	--	PREDICTED: BRO1 domain-containing protein BROX homolog isoform X2 [Capsicum annuum]	-	-	-	-	-	-	-
Unigene0000117	0.55	0.06	0.43	0.747	0.157	0.093	0	0.28	--	-	-	-	-	-	-	-	-
Unigene0000118	1.04	0.82	0.433	1.55	1.443	2.233	0.48	2.497	SD18	G-type lectin S-receptor-like serine/threonine-protein kinase At4g27290 isoform X11 [Sesamum indicum]	-	-	-	-	-	GO:0016772//transferase activity, transferring phosphorus-containing groups	-
Unigene0000119	10.34	2.193	8.34	9.717	15.883	1.7	7.87	9.943	At3g11320	disease resistance protein RPS2 [Salvia splendens]	Organismal Systems	Environmental adaptation	ko04626//Plant-pathogen interaction	K13459	GO:0031224//intrinsic component of membrane	-	-
Unigene0000120	0.44	7.97	3.187	0.253	1.437	2.53	0.73	2.23	--	-	-	-	-	-	-	-	-
Unigene0000121	7.393	8.15	9.003	0.04	11.23	12.047	20.483	0.017	--	-	-	-	-	-	-	-	-
Unigene0000122	0.507	6.277	2.383	0.28	2.43	2.383	1.17	3.043	--	-	-	-	-	-	-	-	-
Unigene0000123	0.283	8.137	3.077	0.207	1.053	2.74	0.817	2.91	Pitpnm1	retinal degeneration B-PD [Capsaspora owczarzaki ATCC 30864]	-	-	-	-	-	-	-
Unigene0000124	0.72	10.973	4.243	0.203	2.327	4.197	1.523	4.327	chd-3	LOW QUALITY PROTEIN: chromodomain-helicase-DNA-binding protein Mi-2 homolog [Rhodamnia argentea]	-	-	-	-	-	GO:0003824//catalytic activity;GO:0043167//ion binding	-
Unigene0000125	2.6	0.717	2.807	1.733	1.883	0.42	0.973	1.023	LRK10L-2.8	PREDICTED: probable receptor-like protein kinase At1g67000 [Erythranthe guttata]	-	-	-	-	-	GO:0004672//protein kinase activity	-
Unigene0000126	0.477	10.843	2.937	0.183	1.45	2.86	0.84	2.373	TP53BP2	apoptotic enhancer 1 protein-like [Rhodamnia argentea]	-	-	-	-	-	-	GO:0006259//DNA metabolic process;GO:0007126//meiotic nuclear division;GO:0022402//cell cycle process;GO:0044710//single-organism metabolic process;GO:0050794//regulation of cellular process;GO:0051276//chromosome organization;GO:0051716//cellular response to stimulus;GO:1902589//single-organism organelle organization
Unigene0000127	8.187	6.467	12.943	8.29	6.647	5.49	11.28	5.023	FLAD1	3'-phosphoadenosine 5'-phosphosulfate sulfotransferase (PAPS reductase)/FAD synthetase [Handroanthus impetiginosus]	-	-	-	-	GO:0044424//intracellular part	GO:0003824//catalytic activity	GO:0009108//coenzyme biosynthetic process;GO:0019758//glycosinolate biosynthetic process
Unigene0000128	9.41	1.323	3.52	5.393	14.49	3.44	5.883	8.703	COBL4	COBRA-like protein 4 [Sesamum indicum]	-	-	-	-	GO:0031224//intrinsic component of membrane	-	GO:0009832//plant-type cell wall biogenesis;GO:0010087//phloem or xylem histogenesis;GO:0030198//extracellular matrix organization;GO:0040007//growth;GO:0045491//xylan metabolic process
Unigene0000129	0.35	5.453	3.097	0.18	1.003	1.93	0.61	2.377	piki-1	phosphatidylinositol 4-phosphate 3-kinase C2 domain-containing subunit alpha-like [Rhodamnia argentea]	Metabolism;Cellular Processes;Environmental Information Processing;Metabolism;Cellular Processes	Global and overview maps;Transport and catabolism;Signal transduction;Carbohydrate metabolism;Transport and catabolism	ko01100//Metabolic pathways;ko04145//Phagosome;ko04070//Phosphatidylinositol signaling system;ko00562//Inositol phosphate metabolism;ko04136//Autophagy - other eukaryotes	K00914;K00914;K00914;K00914;K00914	-	-	-
Unigene0000130	0.25	0.09	0.113	4.11	0.35	0.087	0.053	2.743	--	Armadillo-like helical domain containing protein [Dorcoceras hygrometricum]	-	-	-	-	-	-	-
Unigene0000131	0.327	3.103	2.197	0.137	0.8	1.313	0.673	1.407	--	-	-	-	-	-	-	-	-
Unigene0000132	0.34	5.9	4.393	0.353	1.563	2.71	1.01	2.637	SLC25A10	mitochondrial dicarboxylate carrier-like [Rhodamnia argentea]	-	-	-	-	GO:0016020//membrane;GO:0043227//membrane-bounded organelle;GO:0043229//intracellular organelle	GO:0046943//carboxylic acid transmembrane transporter activity	GO:0006818//hydrogen transport;GO:0006820//anion transport;GO:0009987//cellular process;GO:0050896//response to stimulus;GO:1902582//single-organism intracellular transport
Unigene0000133	0.543	10.33	3.623	0.243	1.627	3.087	1.22	3.543	CHD8	chromodomain-helicase-DNA-binding protein 7 [Capsaspora owczarzaki ATCC 30864]	-	-	-	-	-	GO:0003824//catalytic activity;GO:0043167//ion binding	-
Unigene0000134	10.36	6.253	9.023	11.44	13.193	3.05	5.643	6.713	APF1	aspartyl protease family protein 1-like isoform X1 [Sesamum indicum]	-	-	-	-	GO:0031224//intrinsic component of membrane	GO:0008233//peptidase activity	GO:0019538//protein metabolic process;GO:0046942//carboxylic acid transport
Unigene0000135	0.05	0.027	1.027	1.447	0.043	0.043	0.2	1.117	--	-	-	-	-	-	-	-	-
Unigene0000136	36.557	28.96	35.727	31.753	34.6	23.687	37.94	27.727	FTSH4	ATP-dependent zinc metalloprotease FTSH 4, mitochondrial-like [Manihot esculenta]	-	-	-	-	GO:0019866//organelle inner membrane;GO:0031224//intrinsic component of membrane;GO:0043231//intracellular membrane-bounded organelle	GO:0004175//endopeptidase activity;GO:0032550//purine ribonucleoside binding;GO:0042623//ATPase activity, coupled;GO:0043169//cation binding	GO:0009057//macromolecule catabolic process;GO:0019538//protein metabolic process;GO:0044763//single-organism cellular process
Unigene0000137	1.03	0.3	0	0.303	0.86	0.51	0	0.08	--	-	-	-	-	-	-	-	-
Unigene0000138	3.263	0.91	1.667	1.727	2.693	0.82	2.897	1.837	DRP5A	PREDICTED: dynamin-related protein 5A [Erythranthe guttata]	-	-	-	-	GO:0015630//microtubule cytoskeleton;GO:0044444//cytoplasmic part	GO:0017111//nucleoside-triphosphatase activity;GO:0032550//purine ribonucleoside binding	GO:0006305//DNA alkylation;GO:0006342//chromatin silencing;GO:0006997//nucleus organization;GO:0034968//histone lysine methylation;GO:0048285//organelle fission;GO:0048580//regulation of post-embryonic development;GO:0051052//regulation of DNA metabolic process;GO:1901990//regulation of mitotic cell cycle phase transition;GO:1902410//mitotic cytokinetic process
Unigene0000139	130.03	19.18	61.68	134.767	95.68	43.843	44.68	110.083	DBR	2-alkenal reductase (NADP(+)-dependent)-like [Olea europaea var. sylvestris] [Olea europaea]	-	-	-	-	GO:0016020//membrane;GO:0044444//cytoplasmic part	GO:0016628//oxidoreductase activity, acting on the CH-CH group of donors, NAD or NADP as acceptor;GO:0043168//anion binding;GO:0046914//transition metal ion binding	GO:0006721//terpenoid metabolic process;GO:0006950//response to stress
Unigene0000140	0.973	0.797	1.18	0.637	1.287	0.55	1.793	0.673	--	heat- and acid-stable phosphoprotein [Nymphaea thermarum]	-	-	-	-	-	-	-
Unigene0000141	0.193	1.557	1.16	0.363	0.21	1.383	2.577	0.463	--	BnaA05g17040D [Brassica napus]	-	-	-	-	-	-	-
Unigene0000142	3.63	0.02	0.167	0.133	1.683	0.033	0	0.04	--	-	-	-	-	-	-	-	-
Unigene0000143	7.887	3.28	10.087	7.7	4.427	2.97	6.883	3.997	NRPB7	DNA-directed RNA polymerase II subunit RPB7 [Salvia splendens]	Genetic Information Processing	Transcription	ko03020//RNA polymerase	K03015	-	-	-
Unigene0000145	6.143	7.627	5.373	4.907	4.417	3.9	5.38	3.793	SCO5321	3-(3-hydroxy-phenyl)propionate hydroxylase [Salvia splendens]	-	-	-	-	-	GO:0003824//catalytic activity	GO:0044710//single-organism metabolic process
Unigene0000146	2.307	0.207	0.01	1.853	4.163	0.14	0.01	0.94	GIP	ty1-copia retrotransposon protein [Cucumis melo var. makuwa] [Cucumis melo]	Genetic Information Processing	Transcription	ko03020//RNA polymerase	K03006	-	-	-
Unigene0000147	0.173	1.793	0.483	0.037	0.53	1.177	0.153	0.873	--	-	-	-	-	-	-	-	-
Unigene0000148	3.78	3.46	5.38	3.687	5.317	4.043	5.103	4.017	--	protein ALP1-like [Helianthus annuus]	-	-	-	-	-	-	-
Unigene0000149	9.223	1.427	8.2	9.323	5.98	1.467	7.98	6.54	--	ankyrin repeat-containing protein-like [Dorcoceras hygrometricum]	-	-	-	-	-	-	-
Unigene0000150	0.69	0.41	0.843	0	0.08	0.38	1.323	0	--	-	-	-	-	-	-	-	-
Unigene0000151	17.323	8.827	14.857	16.67	16.283	8.657	15.41	15.007	Spast	AAA+-type ATPase [Handroanthus impetiginosus]	-	-	-	-	GO:0016020//membrane	GO:0017111//nucleoside-triphosphatase activity;GO:0032550//purine ribonucleoside binding	GO:0000723//telomere maintenance;GO:0007059//chromosome segregation;GO:0009653//anatomical structure morphogenesis;GO:0010212//response to ionizing radiation;GO:0018205//peptidyl-lysine modification;GO:0032844//regulation of homeostatic process;GO:0033043//regulation of organelle organization;GO:0070192//chromosome organization involved in meiotic cell cycle
Unigene0000152	0.413	7.46	3.87	0.26	1.237	2.603	0.77	2.497	npp-19	Nucleoporin NUP53 [Porphyridium purpureum]	-	-	-	-	-	-	-
Unigene0000153	1.117	1.68	5.317	1.107	1.057	1.013	17.69	0.62	--	-	-	-	-	-	-	-	-
Unigene0000154	37.47	4.023	7.867	53.477	37.417	7.827	2.35	56.233	--	-	-	-	-	-	-	-	-
Unigene0000155	1.193	0.587	1.363	1.73	0.763	0.613	1.037	1.773	--	unnamed protein product, partial [Vitis vinifera]	-	-	-	-	-	-	-
Unigene0000156	0.37	4.2	2.99	0.153	0.867	1.933	0.673	2.077	DNAJC13	DnaJ domain-containing protein RME-8 [Capsaspora owczarzaki ATCC 30864]	-	-	-	-	GO:0012505//endomembrane system;GO:0043231//intracellular membrane-bounded organelle;GO:0044444//cytoplasmic part	-	-
Unigene0000157	3.5	2.127	2.283	3.22	1.757	2.6	2.123	2.463	--	-	-	-	-	-	-	-	-
Unigene0000158	0.52	0.14	0.707	0.783	0.527	0.11	0.59	0.62	--	-	-	-	-	-	-	-	-
Unigene0000159	4.743	0.023	14.99	0.027	5.903	0.007	39.203	0.027	--	-	Metabolism;Metabolism;Metabolism;Metabolism;Metabolism	Global and overview maps;Global and overview maps;Lipid metabolism;Carbohydrate metabolism;Lipid metabolism	ko01100//Metabolic pathways;ko01110//Biosynthesis of secondary metabolites;ko00564//Glycerophospholipid metabolism;ko00562//Inositol phosphate metabolism;ko00565//Ether lipid metabolism	K01114;K01114;K01114;K01114;K01114	-	-	-
Unigene0000160	0.89	1.62	54.58	0	0.433	1.75	92.357	0.097	--	-	-	-	-	-	-	-	-
Unigene0000161	5.213	0.627	3.287	1.457	4.863	1.717	5.683	5.847	At4g27290	G-type lectin S-receptor-like serine/threonine-protein kinase At4g27290 [Sesamum indicum]	-	-	-	-	-	GO:0005488//binding;GO:0016301//kinase activity	GO:0009987//cellular process
Unigene0000162	4.8	0.817	2.327	2.417	3.16	0.86	2.06	1.737	CLV1B	PREDICTED: receptor-like protein kinase 5 [Erythranthe guttata]	Environmental Information Processing	Signal transduction	ko04075//Plant hormone signal transduction	K13415	GO:0016020//membrane	GO:0016301//kinase activity	GO:0002376//immune system process;GO:0006796//phosphate-containing compound metabolic process;GO:0006952//defense response;GO:0009755//hormone-mediated signaling pathway;GO:0033036//macromolecule localization;GO:0043067//regulation of programmed cell death;GO:0061024//membrane organization
Unigene0000163	0.31	0.73	1.427	0.333	0.42	0.35	0.803	0.11	R1B-16	disease resistance protein RGH2 [Striga asiatica]	-	-	-	-	-	-	-
Unigene0000164	0.133	2.453	1.443	0.127	0.243	1.057	0.347	0.937	DRIP1	-	-	-	-	-	-	-	-
Unigene0000165	18.677	2.137	1.697	3.543	10.653	3.407	0.97	1.657	RHD3	RHD3/Sey1, P-loop containing nucleoside triphosphate hydrolase [Artemisia annua]	-	-	-	-	GO:0031090//organelle membrane;GO:0043231//intracellular membrane-bounded organelle	-	GO:0005975//carbohydrate metabolic process;GO:0006865//amino acid transport;GO:0006886//intracellular protein transport;GO:0007010//cytoskeleton organization;GO:0009826//unidimensional cell growth;GO:0010053//root epidermal cell differentiation;GO:0016192//vesicle-mediated transport;GO:0016482//cytoplasmic transport;GO:0042546//cell wall biogenesis;GO:0043067//regulation of programmed cell death;…
Unigene0000167	4.333	12.357	1.517	0.54	5.663	2.773	1.23	0.28	--	Zinc knuckle CX2CX4HX4C, partial [Trema orientale]	-	-	-	-	-	-	-
Unigene0000168	0.107	0.36	0.897	0.03	0.133	0.593	2.1	0.013	--	survival of motor neuron-related-splicing factor 30 [Salvia splendens]	-	-	-	-	-	-	-
Unigene0000169	0.243	0.157	0.487	2.103	0.413	0.12	0.38	2.763	--	-	-	-	-	-	-	-	-
Unigene0000170	0.51	7.443	6.343	0.42	1.333	2.983	1.113	3.41	--	rhomboid-like protein 19 [Physcomitrella patens]	-	-	-	-	-	-	-
Unigene0000171	0.337	4.58	1.947	0.167	1.087	1.987	0.627	2.313	shn-1	ankyrin repeat domain-containing protein 50-like [Cynara cardunculus var. scolymus] [Cynara cardunculus]	-	-	-	-	-	-	GO:0006259//DNA metabolic process;GO:0007126//meiotic nuclear division;GO:0022402//cell cycle process;GO:0044710//single-organism metabolic process;GO:0044765//single-organism transport;GO:0051276//chromosome organization;GO:0065007//biological regulation;GO:1902589//single-organism organelle organization
Unigene0000172	5.123	0.403	4.113	0.307	4.85	0.797	12.2	0.443	--	-	-	-	-	-	-	-	-
Unigene0000173	8.783	3.27	2.38	34.257	10.567	4.053	1.183	33.127	--	PREDICTED: HVA22-like protein k isoform X1 [Lupinus angustifolius]	-	-	-	-	-	-	-
Unigene0000174	40.777	32.547	32.913	36.093	25.777	16.533	33.187	24.777	MICU	calcium uptake protein, mitochondrial isoform X1 [Sesamum indicum]	-	-	-	-	GO:0043231//intracellular membrane-bounded organelle	GO:0046872//metal ion binding	-
Unigene0000175	0.4	8.127	3.583	0.16	1.07	2.267	0.797	1.93	dgk-3	diacylglycerol kinase 1 [Capsaspora owczarzaki ATCC 30864]	Metabolism;Metabolism;Metabolism;Environmental Information Processing;Metabolism	Global and overview maps;Global and overview maps;Lipid metabolism;Signal transduction;Lipid metabolism	ko01100//Metabolic pathways;ko01110//Biosynthesis of secondary metabolites;ko00564//Glycerophospholipid metabolism;ko04070//Phosphatidylinositol signaling system;ko00561//Glycerolipid metabolism	K00901;K00901;K00901;K00901;K00901	-	GO:0016740//transferase activity	GO:0044699//single-organism process;GO:0050896//response to stimulus
Unigene0000176	0.077	0.043	9.84	0.19	0.073	0	0.023	0.153	--	-	-	-	-	-	-	-	-
Unigene0000177	0.947	0	0	1.893	0.237	0	0	1.08	--	protein ALP1-like [Helianthus annuus]	-	-	-	-	-	-	-
Unigene0000178	0.203	1.627	1.44	0.11	1.013	1.977	0.697	1.797	ges-1	neuroligin-3-like [Rhodamnia argentea]	-	-	-	-	-	-	-
Unigene0000179	0.703	11.73	4.673	0.173	2.17	3.893	1.063	4.143	--	-	-	-	-	-	-	-	-
Unigene0000180	0.627	8.6	4.347	0.313	1.46	3.183	1.053	3.303	--	-	-	-	-	-	-	-	-
Unigene0000181	0.347	0.863	0.153	0	0.26	0.95	0.073	0	--	-	-	-	-	-	-	-	-
Unigene0000182	0.257	2.17	0.053	0.027	0.15	1.23	0	0	--	-	-	-	-	-	-	-	-
Unigene0000183	0	0.037	2.237	0.103	0.033	0.923	0.593	0.413	PLDGAMMA1	phospholipase D1/2 [Salvia splendens]	Metabolism;Metabolism;Cellular Processes;Metabolism;Metabolism	Global and overview maps;Global and overview maps;Transport and catabolism;Lipid metabolism;Lipid metabolism	ko01100//Metabolic pathways;ko01110//Biosynthesis of secondary metabolites;ko04144//Endocytosis;ko00564//Glycerophospholipid metabolism;ko00565//Ether lipid metabolism	K01115;K01115;K01115;K01115;K01115	GO:0016020//membrane;GO:0044464//cell part	GO:0004620//phospholipase activity;GO:0046872//metal ion binding;GO:1902936//phosphatidylinositol bisphosphate binding	GO:0003006//developmental process involved in reproduction;GO:0006650//glycerophospholipid metabolic process;GO:0010038//response to metal ion;GO:0042742//defense response to bacterium
Unigene0000184	0.703	17.753	4.66	0.3	1.563	4.457	1.46	3.167	fbxl-1	F-box/LRR-repeat protein 2-like [Rhodamnia argentea]	-	-	-	-	-	-	GO:0009725//response to hormone;GO:0044238//primary metabolic process;GO:0044260//cellular macromolecule metabolic process
Unigene0000185	14.087	7.85	8.453	16.193	10.56	6.613	8.517	13.033	CFDP1	craniofacial development protein 1 isoform X1 [Sesamum indicum]	-	-	-	-	-	-	-
Unigene0000186	24.723	13.783	21.63	24.91	27.767	15.483	25.623	24.09	EIF4G	translation initiation factor 4G [Salvia splendens]	Genetic Information Processing	Translation	ko03013//RNA transport	K03260	-	GO:0003723//RNA binding	GO:0006412//translation;GO:0050896//response to stimulus
Unigene0000187	0.67	0.787	1.22	1.12	1.573	0.597	0	0.707	--	-	-	-	-	-	-	-	-
Unigene0000188	0.537	3.897	3.64	0.38	1.577	2.477	0.893	2.61	Aspg	l-asparaginase i [Chrysochromulina tobinii]	-	-	-	-	-	-	-
Unigene0000189	1.75	16.683	11.773	0.823	5.39	9.927	2.9	12.273	lars-1	leucine--tRNA ligase, cytoplasmic-like [Rhodamnia argentea]	Genetic Information Processing	Translation	ko00970//Aminoacyl-tRNA biosynthesis	K01869	GO:0005737//cytoplasm	GO:0016874//ligase activity	GO:0006412//translation;GO:0034641//cellular nitrogen compound metabolic process;GO:1901564//organonitrogen compound metabolic process
Unigene0000190	19.007	11.553	30.47	0.01	11.733	16.023	25.033	0	--	-	-	-	-	-	-	-	-
Unigene0000191	0.547	7.347	3.433	0.107	1.46	3.017	0.843	2.78	PLA2G6	Calcium-independent phospholipase A2-gamma [Porphyridium purpureum]	-	-	-	-	-	-	GO:0044699//single-organism process;GO:0071704//organic substance metabolic process
Unigene0000192	1.263	14.843	6.323	0.417	3.077	5.843	2.17	4.907	arx-1	actin-related protein 3-like [Rhodamnia argentea]	-	-	-	-	GO:0043232//intracellular non-membrane-bounded organelle;GO:0043234//protein complex;GO:0044444//cytoplasmic part	GO:0005198//structural molecule activity;GO:0005488//binding	GO:0000904//cell morphogenesis involved in differentiation;GO:0016049//cell growth;GO:0045010//actin nucleation
Unigene0000193	2.323	0.55	3.167	2.663	1.173	0.423	0.68	1.64	--	-	-	-	-	-	-	-	-
Unigene0000194	9.743	1.93	5.707	30.393	6.567	2.687	4.267	28.173	At1g06550	serine/threonine-protein kinase TIO [Dorcoceras hygrometricum]	-	-	-	-	GO:0009536//plastid	GO:0003824//catalytic activity	GO:0032958//inositol phosphate biosynthetic process;GO:0043623//cellular protein complex assembly
Unigene0000195	0.587	9.62	3.313	0.363	1.587	2.93	0.96	3.377	Strip1	striatin-interacting protein 1 homolog [Rhodamnia argentea]	-	-	-	-	-	-	-
Unigene0000196	0.55	4.303	6.173	0.123	0.29	4.317	11.563	0.06	--	protein UNUSUAL FLORAL ORGANS [Sesamum indicum]	-	-	-	-	-	-	GO:0044238//primary metabolic process;GO:0044260//cellular macromolecule metabolic process
Unigene0000197	1.983	2.087	6.177	2.613	1.507	2.92	7.723	2.013	--	Apoptotic ATPase [Handroanthus impetiginosus]	-	-	-	-	-	-	-
Unigene0000198	0.403	0.327	1.927	1.003	0.203	0.547	2.277	0.757	--	hypothetical protein Saspl_023835 [Salvia splendens]	-	-	-	-	-	-	-
Unigene0000199	2.197	0.687	2.89	1.09	0.497	0.413	1.783	0.49	--	Apoptotic ATPase [Handroanthus impetiginosus]	-	-	-	-	-	-	-
Unigene0000200	1.233	10.553	4.703	0.217	2.18	4.42	1.307	4.383	fzo-1	transmembrane GTPase Marf-like [Rhodamnia argentea]	-	-	-	-	-	-	-
Unigene0000201	0.783	8.763	5.23	0.377	2.017	4.147	1.447	4.157	dcr-1	endoribonuclease Dcr-1-like [Rhodamnia argentea]	-	-	-	-	-	GO:0005488//binding;GO:0016787//hydrolase activity	GO:0010468//regulation of gene expression;GO:0016070//RNA metabolic process;GO:0044763//single-organism cellular process;GO:0050896//response to stimulus
Unigene0000202	0.513	7.137	5.007	0.243	1.46	2.933	1.137	3.433	UGGT1	UDP-glucose:glycoprotein glucosyltransferase-like isoform X2 [Physcomitrella patens]	Genetic Information Processing	Folding, sorting and degradation	ko04141//Protein processing in endoplasmic reticulum	K11718	GO:0043231//intracellular membrane-bounded organelle;GO:0044444//cytoplasmic part	GO:0016740//transferase activity	GO:0006139//nucleobase-containing compound metabolic process;GO:0033554//cellular response to stress;GO:0044260//cellular macromolecule metabolic process;GO:0044710//single-organism metabolic process;GO:0044763//single-organism cellular process;GO:0045087//innate immune response;GO:1901135//carbohydrate derivative metabolic process
Unigene0000203	11.597	6.14	8.697	12.747	9.14	4.043	7.83	7.953	At1g11300	G-type lectin S-receptor-like serine/threonine-protein kinase At1g11300 [Sesamum indicum]	-	-	-	-	GO:0016020//membrane	GO:0005488//binding;GO:0016301//kinase activity	GO:0009987//cellular process
Unigene0000204	0.573	0.167	0.96	1.393	2.227	0.187	1.337	1.303	--	-	-	-	-	-	-	-	-
Unigene0000205	5.29	3.54	8.44	7.29	3.093	3.59	10.717	6.39	R1A-10	disease resistance protein [Striga asiatica]	-	-	-	-	-	-	-
Unigene0000206	7.15	4.103	8.703	5.817	5.183	4.127	7.933	5.583	--	pentatricopeptide repeat protein [Salvia miltiorrhiza]	-	-	-	-	-	-	GO:0007059//chromosome segregation;GO:0022402//cell cycle process;GO:0033043//regulation of organelle organization
Unigene0000207	0	1.077	6.193	0	0.043	0.733	2.803	0	--	-	-	-	-	-	-	-	-
Unigene0000208	7.053	1.707	7.88	4.093	2.43	2.807	4.1	2.573	SPPL2	signal peptide peptidase-like 2B [Salvia splendens]	-	-	-	-	GO:0031090//organelle membrane;GO:0031224//intrinsic component of membrane;GO:0043231//intracellular membrane-bounded organelle	GO:0016787//hydrolase activity	GO:0019538//protein metabolic process
Unigene0000209	0.597	9.56	4.687	0.26	1.413	3.267	1.133	3.723	cpsf-1	cleavage and polyadenylation specificity factor subunit 1-like [Rhodamnia argentea]	Genetic Information Processing	Translation	ko03015//mRNA surveillance pathway	K14401	-	-	-
Unigene0000210	0.603	7.717	3.537	0.27	1.527	2.86	0.9	2.433	upf3a	Nucleotide-binding alpha-beta plait domain containing protein [Trema orientale]	Genetic Information Processing;Genetic Information Processing	Translation;Translation	ko03013//RNA transport;ko03015//mRNA surveillance pathway	K14328;K14328	GO:0043229//intracellular organelle	-	GO:0000956//nuclear-transcribed mRNA catabolic process
Unigene0000211	0.127	1.34	0.397	0.013	0.17	0.62	0.2	0.31	nr2c1-a	ecdysone receptor-like [Rhodamnia argentea]	-	-	-	-	-	-	-
Unigene0000212	0.533	8.147	4.93	0.207	1.897	3.743	1.107	4.123	hipr-1	huntingtin-interacting protein 1-related protein-like [Rhodamnia argentea]	-	-	-	-	-	-	-
Unigene0000213	5.26	4.8	5.273	5.243	4.477	2.973	5.673	4.75	PCMP-H24	pentatricopeptide repeat protein [Salvia miltiorrhiza]	-	-	-	-	-	-	-
Unigene0000214	2.243	5.02	0.853	4.333	3.06	5.54	0.013	3.223	UBP5	ubiquitin carboxyl-terminal hydrolase 4/11/15 [Salvia splendens]	-	-	-	-	GO:0043231//intracellular membrane-bounded organelle	GO:0036459//thiol-dependent ubiquitinyl hydrolase activity;GO:0046914//transition metal ion binding;GO:0070011//peptidase activity, acting on L-amino acid peptides	GO:0019941//modification-dependent protein catabolic process;GO:0070646//protein modification by small protein removal
Unigene0000215	17.253	5.25	7.697	7.237	19.167	5.647	7.893	6.467	TGH	G patch domain-containing protein 1 [Salvia splendens]	-	-	-	-	GO:0043231//intracellular membrane-bounded organelle	GO:0003723//RNA binding	GO:0006402//mRNA catabolic process;GO:0007049//cell cycle;GO:0009755//hormone-mediated signaling pathway;GO:0009888//tissue development;GO:0060918//auxin transport;GO:0070918//production of small RNA involved in gene silencing by RNA
Unigene0000216	2.227	1.74	2.11	2.377	2.027	0.937	0.847	1.067	DDB2	DNA damage-binding protein 2 [Salvia splendens]	Genetic Information Processing;Genetic Information Processing	Folding, sorting and degradation;Replication and repair	ko04120//Ubiquitin mediated proteolysis;ko03420//Nucleotide excision repair	K10140;K10140	GO:0031461//cullin-RING ubiquitin ligase complex;GO:0043231//intracellular membrane-bounded organelle	GO:0003676//nucleic acid binding;GO:0046914//transition metal ion binding	GO:0006259//DNA metabolic process;GO:0032446//protein modification by small protein conjugation;GO:0033554//cellular response to stress
Unigene0000217	16.4	2.837	14.987	25.773	11.743	5.45	8.65	22.043	--	-	-	-	-	-	-	-	-
Unigene0000219	9.633	0	3.75	3.58	8.713	0	0	2.033	--	-	-	-	-	-	-	-	-
Unigene0000220	0.147	0.32	0	0.133	0.213	0.667	0.297	0.15	--	-	-	-	-	-	-	-	-
Unigene0000221	0.05	0.03	2.547	0.347	0.143	0.13	0	0.31	--	-	-	-	-	-	-	-	-
Unigene0000225	1.533	0.527	2.263	1.43	0.963	0.763	1.56	0.743	--	PREDICTED: ZEAMMB73_Zm00001d016452 [Prunus dulcis]	-	-	-	-	GO:0043231//intracellular membrane-bounded organelle	-	GO:0010208//pollen wall assembly
Unigene0000226	0.61	0.117	0.383	1.317	0.813	0.147	0.54	1.483	--	-	-	-	-	-	-	-	-
Unigene0000227	0.447	0	0.263	0	0	0.063	0.51	0	--	-	-	-	-	-	-	-	-
Unigene0000228	6.52	3.333	7.397	6.903	4.94	3.38	5.473	5.433	WAV2	protein bem46-like protein [Corchorus olitorius]	-	-	-	-	GO:0005576//extracellular region;GO:0031090//organelle membrane;GO:0043231//intracellular membrane-bounded organelle	-	GO:0009630//gravitropism;GO:0009648//photoperiodism;GO:0044767//single-organism developmental process
Unigene0000229	0.393	0	0	0.943	0.113	0	0.07	0.193	--	-	-	-	-	-	-	-	-
Unigene0000230	0.483	0.383	1.623	0.32	0.417	0.387	0.877	0.5	--	-	-	-	-	-	-	-	-
Unigene0000231	0.427	0.41	2.537	0.323	0.443	0.217	1.037	0.19	--	-	-	-	-	-	-	-	-
Unigene0000232	10.62	8.483	15.273	13.687	9.057	8.673	13.887	10.11	ASHH3	histone-lysine N-methyltransferase SETD2 [Salvia splendens]	-	-	-	-	GO:0005911//cell-cell junction;GO:0043231//intracellular membrane-bounded organelle;GO:0043232//intracellular non-membrane-bounded organelle	GO:0016279//protein-lysine N-methyltransferase activity	GO:0016571//histone methylation
Unigene0000233	0.15	0.203	0.507	0.057	0.57	0	0.79	0.247	--	-	-	-	-	-	-	-	-
Unigene0000234	1.133	0.487	2.14	2.31	1.97	0.41	0.603	1.567	--	two-component response regulator ARR-B family [Salvia splendens]	-	-	-	-	-	-	-
Unigene0000235	6.287	4.043	5.547	5.163	6.233	3.393	5.94	5.823	EDR2	enhanced disease resistance 2 [Striga asiatica]	-	-	-	-	GO:0031090//organelle membrane;GO:0031224//intrinsic component of membrane	GO:1901981//phosphatidylinositol phosphate binding	GO:0000160//phosphorelay signal transduction system;GO:0001101//response to acid chemical;GO:0002831//regulation of response to biotic stimulus;GO:0009725//response to hormone;GO:0033554//cellular response to stress;GO:0051093//negative regulation of developmental process
Unigene0000236	0.12	0.237	0	0.41	0.84	0.33	0	0.387	--	-	-	-	-	-	-	-	-
Unigene0000237	9.14	4.75	7.28	6.613	8.533	5.353	9.677	8.01	--	PREDICTED: At5g01610 [Prunus dulcis]	-	-	-	-	-	-	GO:0006625//protein targeting to peroxisome;GO:0009062//fatty acid catabolic process
Unigene0000239	0.7	0.26	1.69	1.007	0.757	0.493	1.203	0.59	--	-	-	-	-	-	-	-	-
Unigene0000240	0.997	0.817	1.453	0.94	1.087	0.89	3.09	0.927	--	-	-	-	-	-	-	-	-
Unigene0000241	0.363	5.51	2.173	0.243	1.213	1.723	0.397	1.867	Y43F4A.1	leishmanolysin-like peptidase [Chrysochromulina tobinii]	-	-	-	-	-	-	-
Unigene0000242	1.303	11.807	5.157	0.48	3.07	4.69	1.27	5.137	Bm1_29045	eukaryotic translation initiation factor 3 subunit A-like [Rhodamnia argentea]	Genetic Information Processing	Translation	ko03013//RNA transport	K03254	GO:0016020//membrane;GO:0044444//cytoplasmic part	-	GO:0006412//translation
Unigene0000243	134.097	26.63	84.407	63.277	140.183	39.903	112.51	72.587	CAC3	Carboxyltransferase alpha subunit of Heteromeric ACCase [Salvia miltiorrhiza]	Metabolism;Metabolism;Metabolism;Metabolism;Metabolism;Metabolism;Metabolism	Global and overview maps;Global and overview maps;Global and overview maps;Carbohydrate metabolism;Global and overview maps;Carbohydrate metabolism;Lipid metabolism	ko01100//Metabolic pathways;ko01110//Biosynthesis of secondary metabolites;ko01200//Carbon metabolism;ko00620//Pyruvate metabolism;ko01212//Fatty acid metabolism;ko00640//Propanoate metabolism;ko00061//Fatty acid biosynthesis	K01962;K01962;K01962;K01962;K01962;K01962;K01962	GO:0009528//plastid inner membrane;GO:0009532//plastid stroma	GO:0016421//CoA carboxylase activity;GO:0016787//hydrolase activity;GO:0016859//cis-trans isomerase activity;GO:0032550//purine ribonucleoside binding	GO:0006631//fatty acid metabolic process;GO:0006743//ubiquinone metabolic process;GO:0015937//coenzyme A biosynthetic process;GO:0044267//cellular protein metabolic process
Unigene0000244	5.31	0.47	5.857	4.407	4.367	2.467	3.6	4.21	BOU	solute carrier family 25 (mitochondrial carnitine/acylcarnitine transporter), member 20/29 [Salvia splendens]	-	-	-	-	GO:0009536//plastid;GO:0019866//organelle inner membrane;GO:0031224//intrinsic component of membrane	-	GO:0006812//cation transport;GO:1902582//single-organism intracellular transport
Unigene0000245	0.153	0.987	1.56	0	0.193	0.237	0.31	0	--	-	-	-	-	-	-	-	-
Unigene0000246	0.427	6.563	2.993	0.19	1.447	2.747	0.853	2.28	--	PREDICTED: DNA topoisomerase 3-beta isoform X1 [Nicotiana sylvestris]	-	-	-	-	-	-	-
Unigene0000247	4.48	8.237	2.183	6.077	5.953	9.29	1.52	5.823	--	protein ALP1-like isoform X1 [Chenopodium quinoa]	-	-	-	-	-	-	-
Unigene0000248	0.28	4.197	2.91	0.38	0.743	1.887	0.49	1.453	unc-7	innexin inx2-like [Rhodamnia argentea]	-	-	-	-	-	-	-
Unigene0000249	0.083	0.167	0.407	0.313	0.1	0.193	1.467	0.347	At1g66310	F-box/LRR-repeat protein 25-like isoform X2 [Olea europaea var. sylvestris] [Olea europaea]	-	-	-	-	-	-	-
Unigene0000250	0.67	9.5	5.277	0.533	2.99	4.91	2.033	6.947	Dst	spectrin beta chain-like [Rhodamnia argentea]	-	-	-	-	-	-	GO:0044763//single-organism cellular process;GO:0065007//biological regulation
Unigene0000251	0.193	4.577	1.49	0.053	0.61	1.267	0.443	0.903	nav3	-	-	-	-	-	-	-	-
Unigene0000252	1.02	15.83	5.9	0.603	3.943	6.83	2.55	8.043	apy-1	soluble calcium-activated nucleotidase [Blastocystis sp. ATCC 50177/Nand II]	Metabolism;Metabolism;Metabolism	Global and overview maps;Nucleotide metabolism;Nucleotide metabolism	ko01100//Metabolic pathways;ko00230//Purine metabolism;ko00240//Pyrimidine metabolism	K12304;K12304;K12304	-	GO:0016787//hydrolase activity	-
Unigene0000253	1.25	3.12	0.123	0.013	0.57	1.613	0.337	0	--	replication factor-A carboxy-terminal domain protein [Medicago truncatula]	-	-	-	-	-	-	-
Unigene0000254	0.457	5.71	3.043	0.12	1.18	2.573	0.387	2.52	--	-	-	-	-	-	-	-	-
Unigene0000255	0.583	0.213	0.433	0.557	0.74	0.443	1.083	0.68	--	-	-	-	-	-	-	-	-
Unigene0000256	0.967	11.077	6.33	0.47	2.683	5.19	1.9	6.207	emb-5	transcription elongation factor SPT6-like [Rhodamnia argentea]	-	-	-	-	-	-	GO:0044237//cellular metabolic process;GO:0044238//primary metabolic process;GO:0071704//organic substance metabolic process
Unigene0000257	2.627	23.397	23.123	3.29	8.043	9.567	5.077	19.907	gale-1	UDP-glucose 4-epimerase 5 [Manihot esculenta]	Metabolism;Metabolism;Metabolism	Global and overview maps;Carbohydrate metabolism;Carbohydrate metabolism	ko01100//Metabolic pathways;ko00520//Amino sugar and nucleotide sugar metabolism;ko00052//Galactose metabolism	K01784;K01784;K01784	GO:0005794//Golgi apparatus;GO:0016020//membrane	GO:0005515//protein binding;GO:0016857//racemase and epimerase activity, acting on carbohydrates and derivatives	GO:0006012//galactose metabolic process;GO:0009250//glucan biosynthetic process;GO:0010015//root morphogenesis;GO:0010396//rhamnogalacturonan II metabolic process;GO:0042546//cell wall biogenesis;GO:0045229//external encapsulating structure organization;GO:0048229//gametophyte development
Unigene0000258	0.287	5.173	3.193	0.3	1.17	2.777	0.787	3.37	SNX1	sorting nexin-2-like [Rhodamnia argentea]	Cellular Processes	Transport and catabolism	ko04144//Endocytosis	K17917	GO:0005768//endosome	GO:0005488//binding	GO:0009987//cellular process;GO:0050896//response to stimulus;GO:1902582//single-organism intracellular transport
Unigene0000259	13.98	4.24	10.06	11.41	13.39	8.293	13.163	9.68	--	UDP-N-acetylmuramate--L-alanine ligase [Actinidia chinensis var. chinensis] [Actinidia chinensis]	-	-	-	-	-	-	-
Unigene0000260	0.27	4.59	1.817	0.097	0.737	1.467	0.46	1.417	UTP20	small subunit processome component 20 homolog [Rhodamnia argentea]	-	-	-	-	-	-	-
Unigene0000261	0.043	0.143	0	0.077	0	0.433	0	0	--	-	-	-	-	-	-	-	-
Unigene0000262	0.453	0.8	5.42	0.203	0.98	0.863	0.43	1.943	dpy-18	prolyl 4-hydroxylase subunit alpha-1-like [Rhodamnia argentea]	-	-	-	-	-	-	-
Unigene0000263	0.31	4.963	3.083	0.107	0.827	1.967	0.553	1.577	Kifap3	Kinesin associated protein KAP [Klebsormidium nitens]	-	-	-	-	-	-	-
Unigene0000264	0.527	11.983	11.173	0.567	1.583	4.867	3.32	6.487	--	-	-	-	-	-	-	-	-
Unigene0000265	33.36	16.733	23.763	27.81	31.88	14.727	28.23	25.587	TMN12	transmembrane 9 superfamily member 2/4 [Salvia splendens]	-	-	-	-	GO:0005911//cell-cell junction;GO:0031090//organelle membrane;GO:0031224//intrinsic component of membrane;GO:0031984//organelle subcompartment;GO:0043231//intracellular membrane-bounded organelle	-	-
Unigene0000266	0.307	0.047	0	0.507	0.457	0.34	0.087	0.043	--	-	-	-	-	-	-	-	-
Unigene0000267	6.617	3.077	3.273	4.19	13.85	1.103	1.733	3.69	At3g11230	PREDICTED: protein yippee-like [Erythranthe guttata]	-	-	-	-	GO:0043231//intracellular membrane-bounded organelle	-	-
Unigene0000268	0.507	18.07	3.413	0.1	3.083	5.587	2.177	3.77	unc-15	paramyosin-like [Rhodamnia argentea]	-	-	-	-	-	-	-
Unigene0000269	15.593	175.27	238.95	19.407	88.703	216.987	73.14	290.447	--	-	-	-	-	-	-	-	-
Unigene0000270	1.903	26.853	44.683	2.39	19.517	48.96	12.793	115.397	--	-	-	-	-	-	-	-	-
Unigene0000271	44.63	412.763	539.907	39.127	346.96	762.47	171.73	1156.97	vit-6	-	-	-	-	-	-	-	-
Unigene0000272	0.197	6.447	2.05	0.083	0.823	1.967	0.677	1.923	osa	ribosomal-alanine N-acetyltransferase [Micractinium conductrix]	-	-	-	-	-	-	-
Unigene0000273	9.78	8.063	9.323	6.06	6.537	4.663	7.39	5.893	ABC1K7	ubiquinone biosynthesis protein [Salvia splendens]	-	-	-	-	-	GO:0016740//transferase activity	GO:0006796//phosphate-containing compound metabolic process
Unigene0000274	0.573	7.13	4.663	0.267	2.06	3.283	1.337	4.183	skn-1	-	-	-	-	-	-	-	-
Unigene0000275	0.07	4.3	1.98	0.147	0.867	1.66	0.683	1.63	Gata1	GATA factor SREP-like [Quercus suber]	-	-	-	-	-	-	-
Unigene0000276	0.583	4.22	3.56	0.27	0.433	2.967	0.587	2.243	AGO5	protein argonaute 4-like [Spinacia oleracea]	-	-	-	-	GO:0031981//nuclear lumen	GO:0003676//nucleic acid binding	GO:0006259//DNA metabolic process;GO:0006351//transcription, DNA-templated;GO:0006950//response to stress;GO:0007049//cell cycle;GO:0016570//histone modification;GO:0019219//regulation of nucleobase-containing compound metabolic process;GO:0035194//posttranscriptional gene silencing by RNA;GO:0043414//macromolecule methylation;GO:0048513//animal organ development;GO:0051704//multi-organism proces…
Unigene0000277	2.58	5410.06	9.64	4.163	2.243	8539.81	5.263	5.01	ORF1	-	-	-	-	-	-	-	-
Unigene0000278	54.007	20.27	44.957	43.547	59.847	16.52	44.23	22.387	CRK8	PREDICTED: cysteine-rich receptor-like protein kinase 29 [Erythranthe guttata]	-	-	-	-	-	GO:0004672//protein kinase activity	GO:0006796//phosphate-containing compound metabolic process
Unigene0000279	0.347	5.703	2.553	0.123	0.693	2.07	0.417	1.71	--	Phosphatidylinositol 4-phosphate 5-kinase 4 [Symbiodinium microadriaticum]	-	-	-	-	-	-	-
Unigene0000280	39.497	7.937	25.007	30.463	38.3	17.58	25.81	28.13	At3g03300	Dicer-like protein 2 [Salvia miltiorrhiza]	-	-	-	-	-	-	-
Unigene0000281	0.467	7.303	3.177	0.127	1.09	2.31	0.54	2.343	Kiaa0100	protein KIAA0100-like [Rhodamnia argentea]	-	-	-	-	-	-	-
Unigene0000282	0.573	6.697	6.547	0.177	0.963	1.457	1.763	2.55	--	-	-	-	-	-	-	-	-
Unigene0000283	0	0.83	0.16	0	0.197	0.113	0.323	0.54	--	-	-	-	-	-	-	-	-
Unigene0000284	0.767	0.733	0.203	1.22	1.403	0.157	0	1.783	--	-	-	-	-	-	-	-	-
Unigene0000285	51.3	40.33	53.273	39.17	37.687	38.513	52.42	29.077	--	RNA polymerase I-specific transcription initiation factor RRN3 [Salvia splendens]	-	-	-	-	-	-	GO:0010467//gene expression;GO:0034645//cellular macromolecule biosynthetic process;GO:0044238//primary metabolic process
Unigene0000286	0.5	6.847	6.017	0.563	1.89	3.733	1.837	7.843	--	-	-	-	-	-	-	-	-
Unigene0000287	0	0	0	0.177	0.75	0.207	0	0.193	--	-	-	-	-	-	-	-	-
Unigene0000288	4.317	0.86	2.97	5.7	1.733	0.693	2.223	2.27	--	PREDICTED: probable disease resistance RPP8-like protein 4 [Erythranthe guttata]	-	-	-	-	-	-	-
Unigene0000289	0	0.433	0.62	0	0	0.167	0	0.067	--	-	-	-	-	-	-	-	-
Unigene0000290	0.023	1.417	1.25	0.03	0.1	0.59	0.15	0.233	--	-	-	-	-	-	-	-	-
Unigene0000291	0	1.103	1.213	0.257	0	0.137	0.437	0.163	--	-	-	-	-	-	-	-	-
Unigene0000292	0.477	4.557	2.567	0.153	0.64	1.807	0.563	1.633	--	-	-	-	-	-	-	-	-
Unigene0000293	0.673	0.023	0.983	0.483	0.197	0.053	0.043	0.427	--	ty3-gypsy retrotransposon protein [Cucumis melo var. makuwa] [Cucumis melo]	-	-	-	-	-	-	-
Unigene0000294	0.493	1.523	0.747	1.873	0.687	1.437	0.38	1.963	--	Wall-associated receptor kinase [Actinidia chinensis var. chinensis] [Actinidia chinensis]	-	-	-	-	-	GO:0005488//binding;GO:0016301//kinase activity	-
Unigene0000295	6.957	3.24	11.94	9.563	5.12	4.563	5.3	5.19	MO2	PREDICTED: zeaxanthin epoxidase, chloroplastic-like [Erythranthe guttata]	-	-	-	-	GO:0043231//intracellular membrane-bounded organelle	GO:0016491//oxidoreductase activity	GO:0009404//toxin metabolic process;GO:0009620//response to fungus;GO:0014070//response to organic cyclic compound
Unigene0000296	0.6	0.077	0.2	1.37	1.943	0.137	0.547	1.53	--	pol protein [Cucumis melo var. makuwa] [Cucumis melo]	-	-	-	-	-	-	-
Unigene0000297	1.603	17.043	9.397	1.26	5.563	8.1	3.107	10.733	AcCoAS	acetyl CoA synthetase [Chlamydomonas reinhardtii]	Metabolism;Metabolism;Metabolism;Metabolism;Metabolism;Metabolism;Metabolism	Global and overview maps;Global and overview maps;Global and overview maps;Carbohydrate metabolism;Carbohydrate metabolism;Carbohydrate metabolism;Carbohydrate metabolism	ko01100//Metabolic pathways;ko01110//Biosynthesis of secondary metabolites;ko01200//Carbon metabolism;ko00010//Glycolysis / Gluconeogenesis;ko00620//Pyruvate metabolism;ko00630//Glyoxylate and dicarboxylate metabolism;ko00640//Propanoate metabolism	K01895;K01895;K01895;K01895;K01895;K01895;K01895	GO:0009536//plastid	GO:0003824//catalytic activity	GO:0032787//monocarboxylic acid metabolic process;GO:0044238//primary metabolic process
Unigene0000298	1.5	0.33	0.35	2	1.457	0.54	0.923	1.743	COR413PM2	cold-regulated 413 plasma membrane protein 2-like [Olea europaea var. sylvestris] [Olea europaea]	-	-	-	-	GO:0031090//organelle membrane;GO:0031224//intrinsic component of membrane;GO:0043231//intracellular membrane-bounded organelle	-	GO:0006970//response to osmotic stress;GO:0009409//response to cold;GO:0009414//response to water deprivation;GO:0009746//response to hexose;GO:0034285//response to disaccharide
Unigene0000299	2.503	0.937	2.667	2.197	2.027	1.39	3.017	1.75	STR8	rhodanese-like domain-containing protein 8, chloroplastic [Sesamum indicum]	-	-	-	-	GO:0043231//intracellular membrane-bounded organelle	-	-
Unigene0000300	0.78	10.773	8.863	0.4	2.597	5.41	1.703	6.293	--	STE/STE7 protein kinase [Capsaspora owczarzaki ATCC 30864]	-	-	-	-	-	-	-
Unigene0000301	0.333	4.987	2.457	0.123	0.727	1.793	0.69	1.707	--	-	-	-	-	-	-	-	-
Unigene0000302	7.783	6.05	9.903	12.503	7.687	5.853	7.967	11.9	TFCC	tubulin-folding cofactor C [Sesamum indicum]	-	-	-	-	GO:0043231//intracellular membrane-bounded organelle;GO:0044425//membrane part	GO:0004175//endopeptidase activity	GO:0006464//cellular protein modification process;GO:0006694//steroid biosynthetic process;GO:0030148//sphingolipid biosynthetic process
Unigene0000303	4.787	1.667	5.317	4.643	3.44	1.687	3.367	3.31	--	Actin-like protein [Actinidia chinensis var. chinensis] [Actinidia chinensis]	-	-	-	-	-	-	-
Unigene0000304	5.083	10.917	9.107	1.617	3.03	3.43	6.253	1.403	At5g23290	prefoldin alpha subunit [Salvia splendens]	-	-	-	-	GO:0043234//protein complex;GO:0044444//cytoplasmic part	GO:0005515//protein binding	GO:0044267//cellular protein metabolic process
Unigene0000305	10.273	2.837	8.54	8.95	8.967	5.633	9.617	8.677	CNGC15B	pentatricopeptide repeat-containing protein At1g51965, mitochondrial [Sesamum indicum]	Organismal Systems	Environmental adaptation	ko04626//Plant-pathogen interaction	K05391	GO:0031976//plastid thylakoid;GO:0044434//chloroplast part	-	GO:0001101//response to acid chemical;GO:0006396//RNA processing
Unigene0000306	11.173	2.687	12.88	13.833	9.4	5.08	5.67	11.4	TMN5	transmembrane 9 superfamily member 3 [Salvia splendens]	-	-	-	-	GO:0005618//cell wall;GO:0005911//cell-cell junction;GO:0031090//organelle membrane;GO:0031984//organelle subcompartment;GO:0043231//intracellular membrane-bounded organelle	-	GO:0051234//establishment of localization
Unigene0000307	0.323	4.437	2.68	0.23	1.073	2.557	0.74	2.82	glp-1	protein tyrosine kinase, partial [Ministeria vibrans]	-	-	-	-	-	-	GO:0006259//DNA metabolic process;GO:0007126//meiotic nuclear division;GO:0022402//cell cycle process;GO:0044710//single-organism metabolic process;GO:0044765//single-organism transport;GO:1902589//single-organism organelle organization
Unigene0000308	0.13	3.483	0.777	0.197	0.663	1.323	0.427	1.41	JPH1	Phosphatidylinositol 4-phosphate 5-kinase 9 [Dichanthelium oligosanthes]	-	-	-	-	-	-	-
Unigene0000309	2.553	2.543	3.233	0	1.037	2.31	3.557	0.04	PAE9	pectin acetylesterase, partial [Mentha spicata]	-	-	-	-	-	-	-
Unigene0000310	0.127	3.77	1.243	0.06	0.39	1.023	0.36	0.79	--	-	-	-	-	-	-	-	-
Unigene0000311	0.52	5.217	3	0.347	1.033	2.05	0.59	2.08	ANGEL2	Endonuclease/exonuclease/phosphatase [Corchorus capsularis]	Genetic Information Processing	Folding, sorting and degradation	ko03018//RNA degradation	K12603	-	-	-
Unigene0000312	11.107	1.807	9.677	7.923	19.353	2.463	7.793	9.283	--	-	-	-	-	-	-	-	-
Unigene0000313	0.423	6.927	1.903	0.06	0.877	1.57	0.457	1.377	TMEM131	Transmembrane protein 131-like isoform B [Glycine soja]	-	-	-	-	-	-	-
Unigene0000314	0.523	5.957	3.107	0.277	1.563	3.65	0.82	2.667	--	general transcription factor IIF subunit 1-like [Rhodamnia argentea]	-	-	-	-	-	-	-
Unigene0000315	0.547	4.59	4.613	0.39	3.513	3.5	1.457	6.86	Acacb	acetyl-CoA carboxylase-like [Rhodamnia argentea]	-	-	-	-	GO:0016020//membrane	GO:0016421//CoA carboxylase activity	GO:0003006//developmental process involved in reproduction;GO:0006633//fatty acid biosynthetic process;GO:0009409//response to cold;GO:0009725//response to hormone;GO:0044260//cellular macromolecule metabolic process;GO:0048507//meristem development
Unigene0000316	0.657	13.84	4.937	0.203	1.58	3.787	0.973	2.61	--	-	-	-	-	-	-	-	-
Unigene0000317	0.113	1.43	0.453	0.047	0.207	0.65	0.16	0.55	--	-	-	-	-	-	-	-	-
Unigene0000318	0.327	6.513	3.743	0.253	1.257	3.08	0.73	2.58	zyg-8	calcium calmodulin-dependent protein kinase type iv [Chrysochromulina tobinii]	-	-	-	-	-	-	-
Unigene0000319	0.663	12.843	3.587	0.25	1.453	3.52	1.12	3.19	jhdm-1	Lysine-specific demethylase 7A [Porphyridium purpureum]	-	-	-	-	-	-	-
Unigene0000320	4.36	2.3	7.303	7.81	5.387	2.343	16.637	11.647	RPP13L4	Apoptotic ATPase [Handroanthus impetiginosus]	-	-	-	-	GO:0016020//membrane;GO:0044424//intracellular part	GO:0005488//binding	GO:0033554//cellular response to stress;GO:0045087//innate immune response
Unigene0000321	6.957	3.85	3.13	7.747	4.627	3.92	2.957	6.173	--	-	-	-	-	-	-	-	-
Unigene0000322	1.377	0.453	0.957	3.86	2.207	0.453	1.11	1.837	R1B-16	disease resistance protein [Striga asiatica]	-	-	-	-	-	-	-
Unigene0000323	2.953	4.767	3.463	5.677	1.14	3.447	1.767	2.407	At3g50280	Shikimate O-hydroxycinnamoyltransferase [Handroanthus impetiginosus]	-	-	-	-	-	GO:0016747//transferase activity, transferring acyl groups other than amino-acyl groups	GO:0009628//response to abiotic stimulus
Unigene0000324	0.673	11.15	3.56	0.263	1.573	3.417	1.24	2.813	--	-	-	-	-	-	-	-	-
Unigene0000325	2.11	0.767	1.347	2.757	2.71	1.58	0.057	2.82	RUS1	protein root UVB sensitive 1, chloroplastic [Rhodamnia argentea]	-	-	-	-	GO:0009526//plastid envelope	-	GO:0009411//response to UV
Unigene0000326	0.503	9.13	4.477	0.45	1.33	3.247	1.587	4.443	--	uncharacterized protein LOC111883255 [Lactuca sativa]	-	-	-	-	-	-	-
Unigene0000327	0.57	6.08	2.673	0.307	1.263	2.597	0.723	2.69	--	-	-	-	-	-	-	-	-
Unigene0000328	0.997	0.283	1.347	1.017	0.957	0.853	2.283	0.913	--	-	-	-	-	-	-	-	-
Unigene0000329	2150.5	25.153	3857.45	6137.7	2262.7	2225.62	4927.66	4888.31	--	SMLII [Salvia miltiorrhiza]	-	-	-	-	-	GO:0016740//transferase activity;GO:0030246//carbohydrate binding;GO:0046872//metal ion binding	GO:0007165//signal transduction;GO:0044238//primary metabolic process;GO:0044260//cellular macromolecule metabolic process;GO:0048523//negative regulation of cellular process;GO:0048583//regulation of response to stimulus;GO:0051302//regulation of cell division
Unigene0000330	12316.7	95.68	19060.8	33124.8	14782.9	9867.43	12169.2	24983.6	LEC1	SMLII [Salvia miltiorrhiza]	-	-	-	-	GO:0005773//vacuole	GO:0016772//transferase activity, transferring phosphorus-containing groups;GO:0046872//metal ion binding;GO:0048029//monosaccharide binding	GO:0006952//defense response;GO:0007154//cell communication;GO:0044238//primary metabolic process;GO:0044260//cellular macromolecule metabolic process;GO:0044700//single organism signaling;GO:0051302//regulation of cell division
Unigene0000331	0.72	13.107	4.18	0.253	1.64	3.54	0.917	3.1	--	armadillo segment polarity protein-like [Rhodamnia argentea]	-	-	-	-	-	-	-
Unigene0000332	19.783	9.113	21.723	21.45	16.933	7.78	16.463	16.537	ENP1	essential nuclear protein 1 [Salvia splendens]	-	-	-	-	-	-	GO:0006221//pyrimidine nucleotide biosynthetic process;GO:0048229//gametophyte development
Unigene0000333	0.35	4.5	2.923	0.15	1.007	1.777	0.513	1.993	rab3gap1	rab3 GTPase-activating protein catalytic subunit [Selaginella moellendorffii]	-	-	-	-	-	-	-
Unigene0000334	0.557	8.31	4.037	0.33	1.597	3.447	1.073	3.433	mog-5	RNA helicase [Capsaspora owczarzaki ATCC 30864]	Genetic Information Processing	Transcription	ko03040//Spliceosome	K12818	GO:0005911//cell-cell junction;GO:0043231//intracellular membrane-bounded organelle;GO:0044444//cytoplasmic part	GO:0003676//nucleic acid binding;GO:0032550//purine ribonucleoside binding;GO:0042623//ATPase activity, coupled	GO:0006396//RNA processing;GO:0006464//cellular protein modification process;GO:0007017//microtubule-based process;GO:1902410//mitotic cytokinetic process
Unigene0000335	6.11	34.447	34.213	4.687	44.717	32.493	14.493	78.617	acly-1	ATP-citrate synthase-like [Rhodamnia argentea]	Metabolism;Metabolism;Metabolism	Global and overview maps;Global and overview maps;Carbohydrate metabolism	ko01100//Metabolic pathways;ko01110//Biosynthesis of secondary metabolites;ko00020//Citrate cycle (TCA cycle)	K01648;K01648;K01648	GO:0005737//cytoplasm	GO:0005488//binding;GO:0016874//ligase activity;GO:0046912//transferase activity, transferring acyl groups, acyl groups converted into alkyl on transfer	GO:0006629//lipid metabolic process;GO:0044237//cellular metabolic process;GO:1901576//organic substance biosynthetic process
Unigene0000336	0.237	3.943	1.927	0.11	0.67	1.557	0.573	1.407	--	-	-	-	-	-	-	-	-
Unigene0000337	0.43	5.69	3.527	0.143	0.94	2.41	0.653	2.13	tim-1	protein timeless homolog [Phalaenopsis equestris]	-	-	-	-	-	-	-
Unigene0000338	0.353	5.32	2.327	0.157	0.93	1.593	0.993	1.393	spt-5	transcription elongation factor SPT5-like [Rhodamnia argentea]	-	-	-	-	-	-	GO:0010467//gene expression;GO:0034645//cellular macromolecule biosynthetic process;GO:0044238//primary metabolic process
Unigene0000339	0.457	5.88	3.433	0.257	1.293	2.643	0.907	2.797	syd-2	liprin-alpha-1-like [Rhodamnia argentea]	-	-	-	-	-	-	-
Unigene0000340	8.657	115.58	127.167	12.417	82.78	176.627	45.667	340.057	vit-6	-	-	-	-	-	-	-	-
Unigene0000341	1.813	0	0	0.253	1.173	0	0.047	0.32	--	disease resistance protein RPM1 [Salvia splendens]	-	-	-	-	-	-	-
Unigene0000342	0.217	0.037	0.037	0.697	0.71	0.187	0	0.82	RPP13L2	Apoptotic ATPase [Handroanthus impetiginosus]	-	-	-	-	-	-	-
Unigene0000345	0.94	0	0	0.307	0.717	0	0	0.117	RPP13L2	Apoptotic ATPase [Handroanthus impetiginosus]	-	-	-	-	-	-	-
Unigene0000346	1.023	0.423	1.557	0.33	0.61	0.733	1.89	0.25	RPP13	Apoptotic ATPase [Handroanthus impetiginosus]	-	-	-	-	-	-	-
Unigene0000347	7.793	0.523	0.8	0.887	3.553	0.61	1.517	0.667	RPP13	disease resistance protein, partial [Striga asiatica]	-	-	-	-	-	-	-
Unigene0000348	0.867	0.193	0.76	1.51	0.843	0.29	0.353	0.923	RPP13L2	disease resistance protein, partial [Striga asiatica]	-	-	-	-	-	-	-
Unigene0000349	2.503	1.127	1.747	2.2	2.23	1.273	2.333	2.177	RPP13	Apoptotic ATPase [Handroanthus impetiginosus]	-	-	-	-	-	-	-
Unigene0000350	0.713	0.81	0.463	0.48	1.6	0.51	0.043	0.2	--	Apoptotic ATPase [Handroanthus impetiginosus]	-	-	-	-	-	-	-
Unigene0000351	1.213	0.43	1.257	1.627	1.827	0.173	1.543	1.26	RPP13L4	disease resistance protein RPM1 [Salvia splendens]	-	-	-	-	-	-	-
Unigene0000352	1.28	0.07	0.967	0	0.437	0.23	0.397	0	RPP13	inositol-1,3,4-trisphosphate 5/6-kinase / inositol-tetrakisphosphate 1-kinase [Salvia splendens]	-	-	-	-	-	-	-
Unigene0000353	0.14	0.08	0.377	0.21	0.207	0	1.043	0.217	R1A-4	disease resistance protein RPM1 [Salvia splendens]	-	-	-	-	-	-	-
Unigene0000354	0	0.867	0.273	0	0	0.15	1.037	0	--	disease resistance protein RPM1 [Salvia splendens]	Organismal Systems	Environmental adaptation	ko04626//Plant-pathogen interaction	K13457	-	-	-
Unigene0000355	0.653	0.257	0.477	0.57	0.41	0.05	0.497	0.32	--	-	-	-	-	-	-	-	-
Unigene0000356	2.083	0.483	0.93	1.267	1.76	0.377	1.32	1.05	RPP13	Apoptotic ATPase [Handroanthus impetiginosus]	-	-	-	-	-	-	-
Unigene0000357	1.75	0.323	1.437	1.33	1.537	0.077	2.38	1.497	RPP13	disease resistance protein RPM1 [Salvia splendens]	-	-	-	-	-	-	-
Unigene0000358	1.407	0.053	0	0.55	2.167	0.303	0	0.61	RPP13	Apoptotic ATPase [Handroanthus impetiginosus]	-	-	-	-	-	-	-
Unigene0000359	1.83	0	0	0	0.317	0	0	0	--	hypothetical protein MIMGU_mgv1a023631mg, partial [Erythranthe guttata]	-	-	-	-	-	-	-
Unigene0000360	1.033	0	0.47	0.307	0.84	0.08	0.247	0.213	--	Apoptotic ATPase [Handroanthus impetiginosus]	-	-	-	-	-	-	-
Unigene0000361	3.563	0.943	2.607	9.863	4.943	2.26	1.027	6.83	--	disease resistance protein, partial [Striga asiatica]	-	-	-	-	-	-	-
Unigene0000362	0	0	0	2.367	0	0	0	1.957	RPP13	Apoptotic ATPase [Handroanthus impetiginosus]	-	-	-	-	-	-	-
Unigene0000363	12.32	85.21	11.213	18.66	7.327	6.743	11.317	7.937	UGT74E2	N-hydroxythioamide S-beta-glucosyltransferase [Salvia splendens]	-	-	-	-	-	GO:0016757//transferase activity, transferring glycosyl groups	-
Unigene0000364	0.257	3.747	2.207	0.103	0.783	1.753	0.543	1.923	F47G9.4	RAC family serine/threonine-protein kinase-like [Symbiodinium microadriaticum]	-	-	-	-	-	-	-
Unigene0000365	20.437	1.657	6.803	14.08	11.957	1.46	0.43	6.7	LRK10L-2.5	PREDICTED: probable receptor-like protein kinase At1g67000 [Erythranthe guttata]	-	-	-	-	-	GO:0016301//kinase activity	-
Unigene0000366	0.613	16.32	5.43	0.273	2.45	5.393	1.773	4.853	Kmt2e	PREDICTED: PHD finger protein MALE STERILITY 1 [Nicotiana sylvestris]	-	-	-	-	-	-	-
Unigene0000367	5.35	2.91	5.75	4.267	4.23	3.617	4.943	4.323	CYP71D55	pentatricopeptide repeat-containing protein At3g54980, mitochondrial isoform X1 [Sesamum indicum]	-	-	-	-	GO:0043231//intracellular membrane-bounded organelle;GO:0044425//membrane part	GO:0019113//limonene monooxygenase activity;GO:0046872//metal ion binding	GO:0044710//single-organism metabolic process
Unigene0000368	0.51	6.037	2.533	0.2	1.717	2.583	0.683	2.74	F30B5.4	Oxidative stress-induced growth inhibitor 1 [Symbiodinium microadriaticum]	-	-	-	-	-	-	-
Unigene0000369	27.563	1.52	4.413	6.553	21.223	0.95	2.24	4.26	At3g47200	UPF0481 protein At3g47200-like [Olea europaea var. sylvestris] [Olea europaea]	-	-	-	-	-	-	-
Unigene0000370	0.657	6.523	3.813	0.28	1.467	3.193	0.637	3.26	--	-	-	-	-	-	-	-	-
Unigene0000371	0.377	7.997	3.12	0.233	1.27	2.467	1.477	3.32	Sptan1	spectrin beta chain-like [Rhodamnia argentea]	-	-	-	-	-	-	-
Unigene0000372	5.117	1.933	2.957	4.84	3.067	2.653	2.713	3.073	R1B-8	disease resistance protein [Striga asiatica]	-	-	-	-	-	-	-
Unigene0000373	0.413	6.66	1.707	0.07	1.243	2.217	0.767	1.883	--	-	-	-	-	-	-	-	-
Unigene0000374	0.633	8.34	6.323	0.6	2.157	4.22	1.76	5.527	ced-7	ATP-binding cassette sub-family A member 1 [Capsaspora owczarzaki ATCC 30864]	Environmental Information Processing	Membrane transport	ko02010//ABC transporters	K05643	GO:0016020//membrane	GO:0017111//nucleoside-triphosphatase activity;GO:0022857//transmembrane transporter activity	GO:0008152//metabolic process;GO:0044763//single-organism cellular process
Unigene0000375	0.623	12.947	4.85	0.28	2.45	4.777	1.563	5.367	PRRC2B	-	-	-	-	-	-	-	-
Unigene0000376	0.087	4.713	0.903	0.023	0.31	0.82	0.333	0.403	unc-89	muscle M-line assembly protein unc-89-like [Rhodamnia argentea]	-	-	-	-	-	-	-
Unigene0000377	0.627	9.68	5.823	0.227	2.067	5.02	1.3	5.323	ZSWIM8	-	-	-	-	-	-	-	-
Unigene0000378	0.627	11	7.603	0.363	2.297	4.577	1.693	4.647	--	differentially expressed in FDCP 8 [Capsaspora owczarzaki ATCC 30864]	-	-	-	-	-	-	-
Unigene0000379	2.997	0.513	3.847	1.033	4.31	3.957	6.68	2.82	MGP	zinc finger protein NUTCRACKER [Sesamum indicum]	-	-	-	-	GO:0043231//intracellular membrane-bounded organelle	GO:0000975//regulatory region DNA binding	GO:0006355//regulation of transcription, DNA-templated;GO:0006811//ion transport;GO:0007568//aging;GO:0009648//photoperiodism;GO:0048506//regulation of timing of meristematic phase transition
Unigene0000380	1.107	11.56	7.047	0.64	3.79	5.64	1.573	9.777	NNT	NAD(P) mitochondrial isoform A [Chlorella sorokiniana]	Metabolism;Metabolism	Global and overview maps;Metabolism of cofactors and vitamins	ko01100//Metabolic pathways;ko00760//Nicotinate and nicotinamide metabolism	K00323;K00323	-	GO:0000166//nucleotide binding;GO:0008746//NAD(P)+ transhydrogenase activity	GO:0044699//single-organism process
Unigene0000381	5.56	3.203	5.26	7.39	4.34	3.697	5.183	5.74	R1A-10	disease resistance protein [Striga asiatica]	-	-	-	-	-	-	-
Unigene0000382	1.417	14.517	10.83	0.6	2.3	6.983	2.98	7.64	FAIM2	glutamate receptor Gr2 [Capsaspora owczarzaki ATCC 30864]	-	-	-	-	-	-	-
Unigene0000383	0.27	5.143	3.487	0.137	0.92	1.693	0.567	1.767	--	Adhesive plaque matrix protein [Symbiodinium microadriaticum]	-	-	-	-	-	-	-
Unigene0000384	0.5	9.893	4.113	0.363	1.813	3.423	1.183	3.703	rgs-6	regulator of G-protein signaling 6-like [Rhodamnia argentea]	-	-	-	-	-	-	-
Unigene0000385	0.54	8.45	3.75	0.25	1.423	2.37	1.03	2.527	RBM12	heterogeneous nuclear ribonucleoprotein F [Cajanus cajan]	-	-	-	-	-	-	-
Unigene0000386	0.16	2.313	1.797	0.067	0.427	0.973	0.39	0.85	Kif13a	kinesin family member 13B [Capsaspora owczarzaki ATCC 30864]	-	-	-	-	-	-	-
Unigene0000387	0.033	0.657	0.79	0.043	0	0.22	0.107	0.263	KIF13B	-	-	-	-	-	-	-	-
Unigene0000388	20.913	12.107	21.057	14.22	19.487	12.95	22.067	18.853	FLACCA	Molybdenum cofactor sulfurase [Handroanthus impetiginosus]	-	-	-	-	GO:0009536//plastid;GO:0016020//membrane	GO:0003824//catalytic activity;GO:0043168//anion binding	-
Unigene0000389	1.863	1.16	1.657	1.05	0.98	0.36	1.487	0.693	ycf45	P-loop containing nucleoside triphosphatehydrolases superfamily protein [Striga asiatica]	-	-	-	-	GO:0009536//plastid	GO:0003824//catalytic activity;GO:0036094//small molecule binding;GO:0097159//organic cyclic compound binding;GO:1901363//heterocyclic compound binding	-
Unigene0000390	18.177	7.257	19.2	19.587	14.907	12.843	20.97	16.917	PYRD	diaminohydroxyphosphoribosylaminopyrimidine deaminase [Salvia splendens]	Metabolism;Metabolism;Metabolism	Global and overview maps;Global and overview maps;Metabolism of cofactors and vitamins	ko01100//Metabolic pathways;ko01110//Biosynthesis of secondary metabolites;ko00740//Riboflavin metabolism	K11752;K11752;K11752	-	-	-
Unigene0000391	0.773	9.797	7.553	0.38	2.32	4.933	1.637	5.527	--	nuclear pore complex protein NUP160-like [Papaver somniferum]	-	-	-	-	-	-	-
Unigene0000392	0.26	7.017	1.93	0.093	0.617	1.677	0.51	1.203	Ca-alpha1D	muscle calcium channel subunit alpha-1-like [Rhodamnia argentea]	-	-	-	-	-	-	GO:0044765//single-organism transport
Unigene0000394	9.533	3.4	10.03	17.757	13.173	0.537	9.13	4.307	9DC3	PREDICTED: receptor-like protein 12 [Gossypium raimondii]	-	-	-	-	-	GO:0016772//transferase activity, transferring phosphorus-containing groups	-
Unigene0000395	0.367	4.53	3.567	0.113	0.753	2.117	0.857	1.92	rgr-1	mediator of RNA polymerase II transcription subunit 14-like [Rhodamnia argentea]	-	-	-	-	-	-	-
Unigene0000396	0.18	3.097	0.627	0.027	0.41	1.067	0.147	0.547	--	-	-	-	-	-	-	-	-
Unigene0000397	0.353	6.967	3.323	0.333	1.03	2.47	0.83	2.457	--	integrator complex subunit 3 homolog [Physcomitrella patens]	-	-	-	-	-	-	-
Unigene0000398	0.31	4.7	4.537	0.307	1.617	3.803	1.313	4.133	F52H2.6	Delta24-sterol reductase [Hondaea fermentalgiana]	Metabolism;Metabolism;Metabolism	Global and overview maps;Global and overview maps;Lipid metabolism	ko01100//Metabolic pathways;ko01110//Biosynthesis of secondary metabolites;ko00100//Steroid biosynthesis	K09828;K09828;K09828	GO:0016020//membrane;GO:0043227//membrane-bounded organelle;GO:0044464//cell part	GO:0003824//catalytic activity	GO:0040007//growth;GO:0044238//primary metabolic process;GO:0044707//single-multicellular organism process;GO:0044710//single-organism metabolic process;GO:0044763//single-organism cellular process;GO:0044767//single-organism developmental process;GO:0048856//anatomical structure development;GO:0071704//organic substance metabolic process;GO:0071840//cellular component organization or biogenesis
Unigene0000399	0.61	7.453	5.31	0.53	2.227	4.277	1.213	5.567	wago-1	PREDICTED: protein argonaute MEL1 [Erythranthe guttata]	-	-	-	-	GO:0044424//intracellular part	GO:0005488//binding	GO:0003002//regionalization;GO:0003006//developmental process involved in reproduction;GO:0006351//transcription, DNA-templated;GO:0006952//defense response;GO:0006996//organelle organization;GO:0009653//anatomical structure morphogenesis;GO:0009791//post-embryonic development;GO:0009888//tissue development;GO:0010033//response to organic substance;GO:0035194//posttranscriptional gene silencing b…
Unigene0000400	0.567	4.123	2.93	0.267	1.617	2.703	0.92	2.557	Ngef	pleckstrin homology (PH) domain-containing protein [Ectocarpus siliculosus]	-	-	-	-	-	-	-
Unigene0000401	0.41	4.907	2.34	0.15	0.953	2.26	0.58	2.21	C09F5.1	-	-	-	-	-	-	-	-
Unigene0000402	0.197	4.153	1.223	0.09	0.907	1.523	0.283	1.433	--	-	-	-	-	-	-	-	-
Unigene0000403	0.337	4.77	4.667	1.05	2.06	3.14	2.557	6.427	Glb1l	beta-galactosidase [Blastocystis sp. ATCC 50177/Nand II]	Metabolism;Metabolism;Metabolism;Metabolism;Metabolism;Metabolism	Global and overview maps;Carbohydrate metabolism;Lipid metabolism;Glycan biosynthesis and metabolism;Glycan biosynthesis and metabolism;Glycan biosynthesis and metabolism	ko01100//Metabolic pathways;ko00052//Galactose metabolism;ko00600//Sphingolipid metabolism;ko00511//Other glycan degradation;ko00531//Glycosaminoglycan degradation;ko00604//Glycosphingolipid biosynthesis - ganglio series	K12309;K12309;K12309;K12309;K12309;K12309	-	GO:0016787//hydrolase activity	GO:0005975//carbohydrate metabolic process;GO:0044260//cellular macromolecule metabolic process
Unigene0000404	224.883	6.663	114.667	136.883	307.967	110.577	181.777	146.46	--	PREDICTED: extensin-3-like, partial [Nicotiana sylvestris]	-	-	-	-	-	-	-
Unigene0000405	1.073	0.083	1.72	2.263	2.18	0.3	2.753	1.483	--	Polysulfide reductase chain A like [Actinidia chinensis var. chinensis] [Actinidia chinensis]	-	-	-	-	-	-	-
Unigene0000406	7.04	6.507	8.727	5.223	5.457	6.333	10.7	5.253	PCMP-H81	pentatricopeptide repeat protein, partial [Salvia miltiorrhiza]	-	-	-	-	-	-	-
Unigene0000407	0.93	16.267	7.783	0.373	2.46	5.287	1.63	5.247	Usp43	PREDICTED: ubiquitin carboxyl-terminal hydrolase 10-like [Tarenaya hassleriana]	-	-	-	-	-	-	-
Unigene0000408	0.377	7.003	3.127	0.247	1.77	3.76	1.323	4.027	Ripor3	-	-	-	-	-	-	-	-
Unigene0000409	0.45	5.933	3.837	0.323	1.223	2.46	1.013	3.027	stip-1	septin and tuftelin-interacting protein 1 homolog 1 [Morus notabilis]	-	-	-	-	-	-	-
Unigene0000410	0.47	7.77	3.043	0.167	1.467	2.69	0.637	2.357	Upf2	PREDICTED: regulator of nonsense transcripts UPF2 isoform X1 [Erythranthe guttata]	Genetic Information Processing;Genetic Information Processing	Translation;Translation	ko03013//RNA transport;ko03015//mRNA surveillance pathway	K14327;K14327	-	-	GO:0009987//cellular process;GO:0050896//response to stimulus
Unigene0000411	5.787	4.57	12.813	3.38	8.043	4.587	12.213	3.86	--	tyrosine/DOPA decarboxylase [Spatholobus suberectus]	-	-	-	-	-	-	-
Unigene0000412	0.447	6.083	1.813	0.147	2.743	3.563	1.647	2.957	mig-6	thrombospondin [Capsaspora owczarzaki ATCC 30864]	-	-	-	-	-	-	-
Unigene0000413	0.227	0.437	0.32	1.103	0.55	1.537	0.053	0.35	--	Reverse transcriptase zinc-binding domain [Macleaya cordata]	-	-	-	-	-	-	-
Unigene0000414	2.36	4.997	3.333	7.807	2.35	8.647	4.76	4.05	ARP6	ribonuclease H [Trifolium pratense]	-	-	-	-	GO:0043231//intracellular membrane-bounded organelle;GO:0043232//intracellular non-membrane-bounded organelle	GO:0005198//structural molecule activity;GO:0032550//purine ribonucleoside binding	GO:0006950//response to stress;GO:0009396//folic acid-containing compound biosynthetic process;GO:0009617//response to bacterium;GO:0009628//response to abiotic stimulus;GO:0009909//regulation of flower development;GO:0010468//regulation of gene expression;GO:0016568//chromatin modification
Unigene0000415	0.83	11.787	6.483	0.393	2.753	4.72	1.757	5.153	Rbm27	zinc finger CCCH domain-containing protein 41-like isoform X4 [Cynara cardunculus var. scolymus] [Cynara cardunculus]	-	-	-	-	-	GO:0005488//binding	-
Unigene0000416	0.5	10.587	2.297	0.317	2.82	5.137	1.817	2.433	Hsp70Ba	heat shock protein 70 [Capsaspora owczarzaki ATCC 30864]	Genetic Information Processing;Genetic Information Processing;Cellular Processes	Folding, sorting and degradation;Transcription;Transport and catabolism	ko04141//Protein processing in endoplasmic reticulum;ko03040//Spliceosome;ko04144//Endocytosis	K03283;K03283;K03283	GO:0005576//extracellular region;GO:0009536//plastid;GO:0030312//external encapsulating structure;GO:0031090//organelle membrane	GO:0016628//oxidoreductase activity, acting on the CH-CH group of donors, NAD or NADP as acceptor;GO:0032550//purine ribonucleoside binding;GO:0044389//ubiquitin-like protein ligase binding	GO:0000302//response to reactive oxygen species;GO:0009408//response to heat;GO:0009642//response to light intensity;GO:0010038//response to metal ion;GO:0010468//regulation of gene expression;GO:0032446//protein modification by small protein conjugation;GO:0033554//cellular response to stress;GO:0034645//cellular macromolecule biosynthetic process;GO:0044710//single-organism metabolic process;GO…
Unigene0000417	0.267	8.027	2.673	0.107	0.84	2.337	0.847	1.947	FHOD1	Tensin phosphatase [Parasponia andersonii]	-	-	-	-	-	-	-
Unigene0000418	3.973	1.217	4.427	3.677	3.383	2.197	3.127	3.233	--	-	-	-	-	-	-	-	-
Unigene0000419	10.24	15.957	2.21	13.173	5.797	4.947	3.99	6.347	CYP83B1	cytochrome P450 CYP71AT92 [Salvia miltiorrhiza]	-	-	-	-	-	GO:0016709//oxidoreductase activity, acting on paired donors, with incorporation or reduction of molecular oxygen, NAD(P)H as one donor, and incorporation of one atom of oxygen;GO:0046906//tetrapyrrole binding;GO:0046914//transition metal ion binding	GO:0044710//single-organism metabolic process
Unigene0000420	0	0.437	0.08	0	0	0.057	0.213	0	--	-	-	-	-	-	-	-	-
Unigene0000421	0.27	5.183	3.313	0.27	0.82	1.44	0.69	1.773	--	DNA-binding protein SMUBP-2 isoform X3 [Selaginella moellendorffii]	-	-	-	-	-	-	-
Unigene0000422	0.253	7.32	2.19	0.013	1.04	2.267	0.497	1.96	MTIF2	translation initiation factor IF-2, mitochondrial-like [Rhodamnia argentea]	-	-	-	-	GO:0005622//intracellular	-	GO:0006996//organelle organization;GO:0044238//primary metabolic process;GO:0044249//cellular biosynthetic process;GO:0044260//cellular macromolecule metabolic process;GO:0044699//single-organism process;GO:1901576//organic substance biosynthetic process
Unigene0000423	29.577	3.587	20.92	24.733	24.037	6.343	27.187	18.793	PME34	probable pectinesterase/pectinesterase inhibitor 34 [Sesamum indicum]	-	-	-	-	GO:0005618//cell wall;GO:0031224//intrinsic component of membrane;GO:0043231//intracellular membrane-bounded organelle	GO:0052689//carboxylic ester hydrolase activity	GO:0000272//polysaccharide catabolic process;GO:0006605//protein targeting;GO:0006970//response to osmotic stress;GO:0009746//response to hexose;GO:0009891//positive regulation of biosynthetic process;GO:0009892//negative regulation of metabolic process;GO:0042044//fluid transport;GO:0042743//hydrogen peroxide metabolic process;GO:0043067//regulation of programmed cell death;GO:0071555//cell wall…
Unigene0000424	5.01	3.387	4.46	4.08	2.607	3.08	6.45	4.4	--	protein RETICULATA-RELATED 1, chloroplastic-like isoform X1 [Olea europaea var. sylvestris] [Olea europaea]	-	-	-	-	GO:0009528//plastid inner membrane	-	-
Unigene0000425	32.293	12.327	27.637	29.093	36.717	17.567	38.383	30.643	MPA1	aminopeptidase N [Salvia splendens]	Metabolism;Metabolism	Global and overview maps;Metabolism of other amino acids	ko01100//Metabolic pathways;ko00480//Glutathione metabolism	K01256;K01256	GO:0005576//extracellular region;GO:0009526//plastid envelope;GO:0009532//plastid stroma;GO:0016020//membrane	GO:0008238//exopeptidase activity;GO:0046914//transition metal ion binding;GO:0097159//organic cyclic compound binding	GO:0006089//lactate metabolic process;GO:0010038//response to metal ion;GO:0019538//protein metabolic process
Unigene0000426	0.513	0.99	1.31	0.68	0.193	0.643	0.167	0.347	--	-	-	-	-	-	-	-	-
Unigene0000428	0.953	9.403	7.493	0.293	1.903	4.737	1.39	5.09	par-1	Mitogen-activated protein kinase kinase kinase 2 [Triticum urartu]	Organismal Systems;Environmental Information Processing;Environmental Information Processing	Environmental adaptation;Signal transduction;Signal transduction	ko04626//Plant-pathogen interaction;ko04016//MAPK signaling pathway - plant;ko04075//Plant hormone signal transduction	K13413;K13413;K13413	-	GO:0016740//transferase activity	GO:0009987//cellular process;GO:0032502//developmental process;GO:0044699//single-organism process
Unigene0000429	1.263	0.56	1.557	0.343	0.67	0.04	0.46	0.417	--	1-aminocyclopropane-1-carboxylate oxidase 2, partial [Sesamum indicum]	-	-	-	-	-	-	-
Unigene0000430	0.317	6.827	2.543	0.187	1.25	2.127	0.91	1.897	RAP1GAP	Rap1GAP [Capsaspora owczarzaki ATCC 30864]	-	-	-	-	-	-	-
Unigene0000431	0.863	10.183	5.59	0.397	2.28	4.413	1.42	4.983	pkc-3	protein kinase C iota type-like [Rhodamnia argentea]	-	-	-	-	-	GO:0004672//protein kinase activity	GO:0009987//cellular process
Unigene0000432	0	0	0.573	1.34	0	0.023	0.06	1.503	--	-	-	-	-	-	-	-	-
Unigene0000433	1.65	0.353	0	0.037	0.59	0.133	0.197	0	AtMg00300	PREDICTED: retrovirus-related Pol polyprotein from transposon TNT 1-94 [Erythranthe guttata]	Genetic Information Processing	Folding, sorting and degradation	ko04120//Ubiquitin mediated proteolysis	K03358	-	GO:0016787//hydrolase activity	-
Unigene0000434	2.48	1.29	1.66	0.647	1.1	0.26	1.54	0.693	--	splicing factor, arginine/serine-rich 2 [Salvia splendens]	-	-	-	-	-	-	-
Unigene0000435	2.907	1.27	3.13	0.92	2.183	2.063	3.067	0.703	--	splicing factor, arginine/serine-rich 2 [Salvia splendens]	-	-	-	-	-	-	-
Unigene0000436	5.69	2.577	2.927	5.783	2.633	2.263	3.993	3.043	--	splicing factor, arginine/serine-rich 2 [Salvia splendens]	-	-	-	-	-	-	-
Unigene0000437	0.63	12.157	4.713	0.287	1.79	4.15	1.13	3.457	unc-16	-	-	-	-	-	-	-	-
Unigene0000438	8.35	0.1	0	13.387	10.277	0.083	0	12.22	BRXL1	PREDICTED: protein Brevis radix-like 1 [Erythranthe guttata]	-	-	-	-	-	-	-
Unigene0000439	0.387	5.987	3.673	0.293	1.657	2.68	1.027	3.08	Tnpo1	transportin-1 [Sphaeroforma arctica JP610]	-	-	-	-	GO:0043231//intracellular membrane-bounded organelle;GO:0044444//cytoplasmic part	GO:0022892//substrate-specific transporter activity	GO:0005976//polysaccharide metabolic process;GO:0006486//protein glycosylation;GO:0006913//nucleocytoplasmic transport;GO:0009664//plant-type cell wall organization;GO:0009887//organ morphogenesis;GO:0009926//auxin polar transport;GO:0009933//meristem structural organization;GO:0010051//xylem and phloem pattern formation;GO:0016049//cell growth
Unigene0000440	0.65	6.747	4.117	0.417	2.197	3.303	1.24	3.657	aldh9a1b	betaine aldehyde dehydrogenase [Capsaspora owczarzaki ATCC 30864]	Metabolism;Metabolism;Metabolism;Metabolism;Metabolism;Metabolism;Metabolism;Metabolism;Metabolism;Metabolism;Metabolism;Metabolism;Metabolism;Metabolism	Global and overview maps;Global and overview maps;Carbohydrate metabolism;Carbohydrate metabolism;Amino acid metabolism;Lipid metabolism;Lipid metabolism;Amino acid metabolism;Amino acid metabolism;Metabolism of other amino acids;Carbohydrate metabolism;Amino acid metabolism;Amino acid metabolism;Metabolism of terpenoids and polyketides	ko01100//Metabolic pathways;ko01110//Biosynthesis of secondary metabolites;ko00010//Glycolysis / Gluconeogenesis;ko00620//Pyruvate metabolism;ko00280//Valine, leucine and isoleucine degradation;ko00561//Glycerolipid metabolism;ko00071//Fatty acid degradation;ko00330//Arginine and proline metabolism;ko00380//Tryptophan metabolism;ko00410//beta-Alanine metabolism;ko00053//Ascorbate and aldarate met…	K00128;K00128;K00128;K00128;K00128;K00128;K00128;K00128;K00128;K00128;K00128;K00128;K00128;K00128	-	-	-
Unigene0000442	0.59	8.943	4.363	0.29	1.743	3.43	1.06	4.117	Pld1	phospholipase D1 [Capsaspora owczarzaki ATCC 30864]	Metabolism;Metabolism;Cellular Processes;Metabolism;Metabolism	Global and overview maps;Global and overview maps;Transport and catabolism;Lipid metabolism;Lipid metabolism	ko01100//Metabolic pathways;ko01110//Biosynthesis of secondary metabolites;ko04144//Endocytosis;ko00564//Glycerophospholipid metabolism;ko00565//Ether lipid metabolism	K01115;K01115;K01115;K01115;K01115	-	GO:0003824//catalytic activity	GO:0006629//lipid metabolic process;GO:0006950//response to stress;GO:0007154//cell communication;GO:0009056//catabolic process;GO:0010033//response to organic substance;GO:0044237//cellular metabolic process;GO:0050794//regulation of cellular process;GO:0070887//cellular response to chemical stimulus
Unigene0000443	0.177	0	3.34	0.04	0.88	0	0.303	0.043	--	-	-	-	-	-	-	-	-
Unigene0000444	6.49	63.167	9	9.653	4.947	4.8	10.15	7.747	XTH30	probable xyloglucan endotransglucosylase/hydrolase protein 30 [Sesamum indicum]	-	-	-	-	GO:0005576//extracellular region;GO:0030312//external encapsulating structure	GO:0016758//transferase activity, transferring hexosyl groups;GO:0016787//hydrolase activity	GO:0044042//glucan metabolic process;GO:0045229//external encapsulating structure organization
Unigene0000445	3.63	0.773	4.053	1.663	1.677	1.017	2.827	1.327	--	traB domain-containing protein [Olea europaea var. sylvestris] [Olea europaea]	-	-	-	-	-	-	-
Unigene0000446	0.093	0.957	1.03	0.473	0.257	0.95	1.37	0.337	--	splicing factor, arginine/serine-rich 2 [Salvia splendens]	-	-	-	-	-	-	-
Unigene0000447	5.013	2.44	4.95	5.16	3.287	2.343	5.333	4.003	--	splicing factor, arginine/serine-rich 2 [Salvia splendens]	-	-	-	-	-	-	-
Unigene0000448	1.293	15.75	12.21	0.553	3.47	7.157	1.973	8.55	XPO7	PREDICTED: exportin-7 isoform X2 [Erythranthe guttata]	-	-	-	-	GO:0044424//intracellular part	-	-
Unigene0000449	0.51	6.423	3.517	0.25	1.29	2.603	0.8	2.747	--	-	-	-	-	-	-	-	-
Unigene0000450	0.01	0.03	9.87	0	0.053	0	0.01	0.01	SUVR4	histone-lysine N-methyltransferase SUV39H [Salvia splendens]	-	-	-	-	GO:0005911//cell-cell junction;GO:0043231//intracellular membrane-bounded organelle;GO:0043232//intracellular non-membrane-bounded organelle	GO:0016279//protein-lysine N-methyltransferase activity	GO:0016568//chromatin modification;GO:0032259//methylation
Unigene0000451	0.283	18.787	3.94	0.093	2.017	6.673	2.73	7.347	CYP2H2	PREDICTED: cytochrome P450 98A2-like [Nicotiana tomentosiformis]	Metabolism;Metabolism;Metabolism;Metabolism;Metabolism	Global and overview maps;Global and overview maps;Biosynthesis of other secondary metabolites;Biosynthesis of other secondary metabolites;Biosynthesis of other secondary metabolites	ko01100//Metabolic pathways;ko01110//Biosynthesis of secondary metabolites;ko00940//Phenylpropanoid biosynthesis;ko00941//Flavonoid biosynthesis;ko00945//Stilbenoid, diarylheptanoid and gingerol biosynthesis	K09754;K09754;K09754;K09754;K09754	GO:0016020//membrane;GO:0043231//intracellular membrane-bounded organelle	GO:0004497//monooxygenase activity;GO:0005488//binding	GO:0009699//phenylpropanoid biosynthetic process
Unigene0000452	0.163	0.93	0.707	0.153	0.897	0.507	0.433	1.233	dpy-18	prolyl 4-hydroxylase subunit alpha-1-like [Rhodamnia argentea]	Metabolism;Metabolism	Global and overview maps;Amino acid metabolism	ko01100//Metabolic pathways;ko00330//Arginine and proline metabolism	K00472;K00472	-	-	-
Unigene0000453	0.433	9.24	2.39	0.13	2.11	3.767	0.923	3.493	CASKIN2	-	-	-	-	-	-	-	-
Unigene0000454	0.463	6.407	2.597	0.137	1.4	2.857	0.767	2.74	hbl-1	PREDICTED: similar to Zinc finger protein 271 (Zinc finger protein 7) (HZF7) (Zinc finger protein ZNFphex133) (Epstein-Barr virus-induced zinc finger protein) (ZNF-EB) (CT-ZFP48) (Zinc finger protein [Bathycoccus prasinos]	-	-	-	-	-	-	-
Unigene0000456	0.353	5.58	2.977	0.243	0.793	1.913	0.907	1.603	MDN1	midasin [Cajanus cajan]	Genetic Information Processing	Translation	ko03008//Ribosome biogenesis in eukaryotes	K14572	-	-	-
Unigene0000457	0.533	0.14	0	0.073	0.513	0.313	0	0.25	R1B-12	PREDICTED: late blight resistance protein R1-A-like [Erythranthe guttata]	-	-	-	-	-	-	-
Unigene0000460	3.543	1.317	2.057	1.18	1.387	1.197	1.21	0.643	R1B-16	disease resistance protein [Striga asiatica]	-	-	-	-	-	-	-
Unigene0000461	1.623	1.343	0.703	0.203	0.34	0.45	0	0	R1B-12	PREDICTED: late blight resistance protein R1-A-like [Erythranthe guttata]	-	-	-	-	-	-	-
Unigene0000462	0	0.8	0.587	0	0	0.603	0	0	--	disease resistance protein RPP13 [Striga asiatica]	-	-	-	-	-	-	-
Unigene0000463	1.45	0.327	0.62	0	0.583	0.247	0.293	0	--	PREDICTED: late blight resistance protein R1-A-like [Erythranthe guttata]	-	-	-	-	-	-	-
Unigene0000464	1.203	1.157	1.143	0.743	0.613	0.567	0.473	0.413	--	disease resistance protein [Striga asiatica]	-	-	-	-	-	-	-
Unigene0000465	0.123	0.5	0.22	0.117	0.43	0.46	0	0.05	--	PREDICTED: disease resistance protein RPP13-like [Erythranthe guttata]	-	-	-	-	-	-	-
Unigene0000466	0.48	0.737	0.15	0.09	0.167	0.563	0.03	0.1	RPP13	PREDICTED: late blight resistance protein R1-A-like [Erythranthe guttata]	-	-	-	-	-	-	-
Unigene0000467	0.53	0.163	0.447	0.11	0.33	0	0.263	0.037	--	PREDICTED: late blight resistance protein R1-A-like [Erythranthe guttata]	-	-	-	-	-	-	-
Unigene0000468	0.567	0.417	0.88	1.083	0.39	0.31	1.337	0.733	R1B-17	PREDICTED: disease resistance protein RPP13-like [Erythranthe guttata]	-	-	-	-	-	-	-
Unigene0000469	0.997	0.963	0.253	0.053	0.173	0.54	0.193	0.06	--	PREDICTED: late blight resistance protein R1-A-like [Erythranthe guttata]	-	-	-	-	-	-	-
Unigene0000470	1.603	0.93	1.687	1.383	1.053	0.64	0.857	0.883	--	PREDICTED: late blight resistance protein R1-A-like [Erythranthe guttata]	-	-	-	-	-	-	-
Unigene0000472	0.74	1.297	3.787	2.083	0.84	1.767	2.13	0.86	RPP8L2	PREDICTED: late blight resistance protein R1-A-like [Erythranthe guttata]	-	-	-	-	-	-	-
Unigene0000474	1.01	1.43	0.12	0.377	0.673	0.503	0.063	0.207	R1C-3	PREDICTED: late blight resistance protein R1-A-like [Erythranthe guttata]	-	-	-	-	-	-	-
Unigene0000475	0.443	0.49	0.54	0.06	0.373	0.46	0	0.2	--	PREDICTED: late blight resistance protein R1-A-like [Erythranthe guttata]	-	-	-	-	-	-	-
Unigene0000476	0.27	0.937	0.497	0.147	0.48	0.3	0.233	0.097	RPP13	PREDICTED: disease resistance protein RPP13-like [Erythranthe guttata]	-	-	-	-	-	-	-
Unigene0000477	0.473	6.447	3.61	0.29	1.093	2.283	1.007	2.79	mdt-17	mediator of RNA polymerase II transcription subunit 17-like [Rhodamnia argentea]	-	-	-	-	-	-	-
Unigene0000478	14.277	15.293	16.87	19.56	7.067	6.243	9.807	8.537	DTX14	multidrug resistance protein, MATE family [Salvia splendens]	-	-	-	-	-	-	-
Unigene0000479	0.23	4.76	1.567	0.107	0.907	1.87	0.633	1.56	rbr-2	lysine-specific demethylase JMJ703-like isoform X2 [Physcomitrella patens]	-	-	-	-	-	-	GO:0044238//primary metabolic process;GO:0044260//cellular macromolecule metabolic process
Unigene0000480	0.233	6.457	1.84	0.123	0.693	1.587	0.31	1.16	CC2D2A	coiled-coil and c2 domain-containing protein 2a [Chrysochromulina tobinii]	-	-	-	-	-	-	-
Unigene0000481	15.033	3.927	10.707	11.977	9.257	6.363	12.433	8.78	SNRNP59	U11/U12 small nuclear ribonucleoprotein 59 kDa protein isoform X1 [Sesamum indicum]	-	-	-	-	GO:0044424//intracellular part	-	-
Unigene0000482	5.457	0.773	2.723	3.77	16.647	2.707	2.66	5.933	DMR6	Iron/ascorbate family oxidoreductase [Handroanthus impetiginosus]	-	-	-	-	-	GO:0016706//oxidoreductase activity, acting on paired donors, with incorporation or reduction of molecular oxygen, 2-oxoglutarate as one donor, and incorporation of one atom each of oxygen into both donors;GO:0043169//cation binding	GO:0006605//protein targeting;GO:0009617//response to bacterium;GO:0009620//response to fungus;GO:0009696//salicylic acid metabolic process;GO:0009755//hormone-mediated signaling pathway;GO:0009812//flavonoid metabolic process;GO:0009814//defense response, incompatible interaction;GO:0009863//salicylic acid mediated signaling pathway;GO:0010243//response to organonitrogen compound;GO:0033554//cel…
Unigene0000483	10.7	2.35	12.657	12.053	8.427	3.197	14.47	9.43	BGAL17	beta-galactosidase [Salvia splendens]	Metabolism;Metabolism;Metabolism;Metabolism;Metabolism;Metabolism	Global and overview maps;Carbohydrate metabolism;Lipid metabolism;Glycan biosynthesis and metabolism;Glycan biosynthesis and metabolism;Glycan biosynthesis and metabolism	ko01100//Metabolic pathways;ko00052//Galactose metabolism;ko00600//Sphingolipid metabolism;ko00511//Other glycan degradation;ko00531//Glycosaminoglycan degradation;ko00604//Glycosphingolipid biosynthesis - ganglio series	K12309;K12309;K12309;K12309;K12309;K12309	GO:0005576//extracellular region	GO:0015925//galactosidase activity;GO:0043169//cation binding	GO:0003006//developmental process involved in reproduction;GO:0018205//peptidyl-lysine modification;GO:0042743//hydrogen peroxide metabolic process;GO:0045491//xylan metabolic process
Unigene0000484	0.85	0.123	0.867	0.59	2.243	0.14	0.503	0.753	--	-	-	-	-	-	-	-	-
Unigene0000485	1.073	18.87	7.327	0.67	4.107	6.957	2.633	8.023	glt1	glutamate synthase [NADH], amyloplastic isoform X2 [Cucurbita pepo subsp. pepo] [Cucurbita pepo]	Metabolism;Metabolism;Metabolism;Metabolism;Metabolism	Global and overview maps;Global and overview maps;Global and overview maps;Amino acid metabolism;Energy metabolism	ko01100//Metabolic pathways;ko01110//Biosynthesis of secondary metabolites;ko01230//Biosynthesis of amino acids;ko00250//Alanine, aspartate and glutamate metabolism;ko00910//Nitrogen metabolism	K00264;K00264;K00264;K00264;K00264	GO:0009532//plastid stroma	GO:0043167//ion binding;GO:0045181//glutamate synthase activity, NAD(P)H as acceptor	GO:0006006//glucose metabolic process;GO:0006090//pyruvate metabolic process;GO:0006536//glutamate metabolic process;GO:0006970//response to osmotic stress;GO:0008652//cellular amino acid biosynthetic process;GO:0009725//response to hormone;GO:0010038//response to metal ion;GO:0040007//growth;GO:0042126//nitrate metabolic process
Unigene0000486	0.297	0.28	0.5	0.29	0.63	0.39	0.903	0.38	--	Retrotransposable element Tf2 [Cajanus cajan]	-	-	-	-	GO:0043231//intracellular membrane-bounded organelle;GO:0044425//membrane part	GO:0016740//transferase activity	GO:0006486//protein glycosylation
Unigene0000487	6.967	10.263	3.827	3.38	2.65	1.563	5.863	3.887	--	nodulin 22 [Cucumis melo var. makuwa] [Cucumis melo]	-	-	-	-	GO:0031090//organelle membrane	-	-
Unigene0000488	63.257	28.367	47.363	43.813	47.067	30.98	54.603	36.137	SEC10b	transcription initiation factor TFIIA small subunit [Salvia splendens]	-	-	-	-	GO:0005911//cell-cell junction;GO:0016020//membrane;GO:0043234//protein complex;GO:0044444//cytoplasmic part	GO:0003824//catalytic activity	GO:0006259//DNA metabolic process;GO:0008104//protein localization;GO:0016192//vesicle-mediated transport;GO:0022406//membrane docking;GO:0030036//actin cytoskeleton organization
Unigene0000489	0.977	2.613	6.307	0.407	0.91	2.183	10.347	0.12	--	-	-	-	-	-	-	-	-
Unigene0000490	11.637	2.977	8.267	7.667	10.077	4.097	9.697	7.957	At5g23430	katanin p80 WD40 repeat-containing subunit B1 [Salvia splendens]	-	-	-	-	GO:0005856//cytoskeleton;GO:0043234//protein complex	GO:0005488//binding	-
Unigene0000491	0.727	0.107	0	0	0.68	0.147	0	0.123	--	-	-	-	-	-	-	-	-
Unigene0000492	6.507	1.553	2.64	3.553	3.807	1.687	2.833	1.993	SD11	Serine/threonine protein kinase [Handroanthus impetiginosus]	-	-	-	-	-	GO:0004672//protein kinase activity;GO:0032550//purine ribonucleoside binding	GO:0006464//cellular protein modification process;GO:0006796//phosphate-containing compound metabolic process;GO:0008037//cell recognition
Unigene0000493	5.89	1.487	2.767	8.143	7.413	1.44	4.277	10.633	RPL4A	PREDICTED: 60S ribosomal protein L4-like [Juglans regia]	Genetic Information Processing	Translation	ko03010//Ribosome	K02930	GO:0030529//intracellular ribonucleoprotein complex	GO:0005198//structural molecule activity	GO:0010467//gene expression
Unigene0000494	66.81	17.497	37.287	38.207	45.253	16.103	44.367	37.367	POT4	KUP system potassium uptake protein [Salvia splendens]	-	-	-	-	GO:0009536//plastid;GO:0031224//intrinsic component of membrane	GO:0046873//metal ion transmembrane transporter activity	GO:0009247//glycolipid biosynthetic process;GO:0009267//cellular response to starvation;GO:0019758//glycosinolate biosynthetic process;GO:0030001//metal ion transport;GO:0034220//ion transmembrane transport;GO:0044723//single-organism carbohydrate metabolic process
Unigene0000495	1.483	0.327	1.217	0	1.313	0.087	0	0	--	disease resistance protein RPM1 [Salvia splendens]	-	-	-	-	-	-	-
Unigene0000496	1.183	0.207	3.53	3.23	1.563	0.19	10.353	1.927	--	PREDICTED: tankyrase-1 [Erythranthe guttata]	-	-	-	-	-	-	-
Unigene0000497	1.423	1.02	1.043	1.29	1.153	0.967	2.177	1.727	--	-	-	-	-	-	-	-	-
Unigene0000498	0.54	0.023	0.047	0.93	0.527	0.073	0.023	0.567	--	-	-	-	-	-	-	-	-
Unigene0000499	1.62	0.8	1.167	1.82	1.887	1.023	2.113	1.18	--	-	-	-	-	-	-	-	-
Unigene0000500	0.527	0.313	1.19	0.99	0.84	0.303	1.143	0.947	--	basal transcription factor complex subunit-related protein [Artemisia annua]	Genetic Information Processing;Genetic Information Processing	Replication and repair;Transcription	ko03420//Nucleotide excision repair;ko03022//Basal transcription factors	K03143;K03143	-	-	-
Unigene0000501	0	0	3.247	0	0	0	7.493	0	--	-	-	-	-	-	-	-	-
Unigene0000502	1.31	0.143	1.513	1.89	1.423	0.497	1.43	1.483	--	translation initiation factor IF-2 [Prunus yedoensis var. nudiflora] [Prunus yedoensis]	-	-	-	-	-	-	GO:0009409//response to cold;GO:0043479//pigment accumulation in tissues in response to UV light;GO:0048437//floral organ development
Unigene0000503	0.99	1.307	2.69	0	0.647	2.053	4.59	0	--	-	-	-	-	-	-	-	-
Unigene0000504	1.46	0.403	0.633	1.967	2.03	0.203	0.6	1.353	--	-	-	-	-	-	-	-	-
Unigene0000505	33.657	28.187	28.76	45.123	32.927	8.78	7.703	27.13	GATL4	basic helix-loop-helix transcription factor [Salvia miltiorrhiza]	-	-	-	-	GO:0031224//intrinsic component of membrane;GO:0042995//cell projection;GO:0043231//intracellular membrane-bounded organelle	GO:0008194//UDP-glycosyltransferase activity	GO:0000271//polysaccharide biosynthetic process;GO:0006928//movement of cell or subcellular component
Unigene0000506	0.793	6.51	3.203	0.28	2.237	3.717	1.223	4.497	--	peroxisome biogenesis factor 14, partial [Nicotiana tabacum]	-	-	-	-	-	-	-
Unigene0000507	4.137	2.543	2.913	4.207	3.54	2.353	0.24	3.783	--	-	-	-	-	-	-	-	-
Unigene0000508	0.44	0.327	0	1.297	0.03	0.123	0	0.697	--	-	-	-	-	-	-	-	-
Unigene0000509	13.43	7.583	14.917	12.647	13.067	7.577	13.96	9.387	CTR1	serine/threonine-protein kinase CTR1 [Salvia splendens]	Environmental Information Processing;Environmental Information Processing	Signal transduction;Signal transduction	ko04016//MAPK signaling pathway - plant;ko04075//Plant hormone signal transduction	K14510;K14510	GO:0031090//organelle membrane;GO:0043231//intracellular membrane-bounded organelle	GO:0004674//protein serine/threonine kinase activity;GO:0032550//purine ribonucleoside binding	GO:0006468//protein phosphorylation;GO:0006950//response to stress;GO:0009685//gibberellin metabolic process;GO:0009746//response to hexose;GO:0009756//carbohydrate mediated signaling;GO:0010039//response to iron ion;GO:0010104//regulation of ethylene-activated signaling pathway;GO:0017145//stem cell division;GO:0034285//response to disaccharide;GO:0048506//regulation of timing of meristematic ph…
Unigene0000510	1.987	1.593	1.463	3.863	1.22	1.38	1.867	2.62	At1g50180	Apoptotic ATPase [Handroanthus impetiginosus]	-	-	-	-	-	-	-
Unigene0000511	3.593	0.647	5.563	0.137	0.867	0.647	6.653	0.397	--	-	-	-	-	-	-	-	-
Unigene0000512	0.24	6.243	2.967	0.15	1.01	2.267	0.86	2.273	GATAD2B	putative uncharacterized protein DDB_G0271606 [Rhodamnia argentea]	-	-	-	-	-	-	-
Unigene0000513	0.767	7.21	1.707	0.653	0.13	0.713	6.393	1.297	ZOX1	zeatin O-glucosyltransferase-like [Sesamum indicum]	Metabolism	Metabolism of terpenoids and polyketides	ko00908//Zeatin biosynthesis	K13495	-	GO:0016757//transferase activity, transferring glycosyl groups	-
Unigene0000514	0	0.067	0.457	4.95	0.02	0.19	0.953	3.9	--	-	-	-	-	-	-	-	-
Unigene0000515	0.707	0.09	0.457	0.44	0.39	0.317	0.437	0.583	--	-	-	-	-	-	-	-	-
Unigene0000516	0.983	0.08	0.123	0	0.5	0.06	0.243	0	--	-	-	-	-	-	-	-	-
Unigene0000517	8.627	3.737	7.437	4.783	12.03	2.923	6.903	4.863	TBL38	protein trichome birefringence-like 38 [Sesamum indicum]	-	-	-	-	GO:0005911//cell-cell junction;GO:0031224//intrinsic component of membrane;GO:0043231//intracellular membrane-bounded organelle	-	-
Unigene0000519	14.987	3.803	6.74	7.723	47	16.187	34.027	23.45	EXPA6	expansin-A6 [Sesamum indicum]	-	-	-	-	GO:0005618//cell wall	-	GO:0000226//microtubule cytoskeleton organization;GO:0006970//response to osmotic stress;GO:0070838//divalent metal ion transport;GO:0071555//cell wall organization
Unigene0000520	118.24	25.537	99.747	64.447	153.913	64.87	161.893	86.787	--	3-methyl-2-oxobutanoate hydroxymethyltransferase [Actinidia chinensis var. chinensis] [Actinidia chinensis]	-	-	-	-	-	-	GO:0000097//sulfur amino acid biosynthetic process;GO:0003006//developmental process involved in reproduction;GO:0006342//chromatin silencing;GO:0009411//response to UV;GO:0009799//specification of symmetry;GO:0009812//flavonoid metabolic process;GO:0009933//meristem structural organization;GO:0009943//adaxial/abaxial axis specification;GO:0034285//response to disaccharide;GO:0035194//posttranscr…
Unigene0000521	32.147	3.68	13.49	19.323	20.67	8.18	20.737	14.597	PEX12	peroxisome biogenesis protein 12 [Olea europaea var. sylvestris] [Olea europaea]	Cellular Processes	Transport and catabolism	ko04146//Peroxisome	K13345	GO:0031231//intrinsic component of peroxisomal membrane	GO:0003824//catalytic activity;GO:0005515//protein binding;GO:0046914//transition metal ion binding	GO:0006511//ubiquitin-dependent protein catabolic process;GO:0006625//protein targeting to peroxisome;GO:0009062//fatty acid catabolic process;GO:0009404//toxin metabolic process;GO:0009653//anatomical structure morphogenesis;GO:0016567//protein ubiquitination;GO:0035966//response to topologically incorrect protein;GO:0043248//proteasome assembly
Unigene0000522	0.127	1.01	0.577	0.05	0.457	0.67	2.077	0.077	--	queuosine biosynthesis protein QueD [Striga asiatica]	-	-	-	-	-	-	-
Unigene0000523	14.5	6.607	13.697	11.413	17.343	6.58	8.953	10.87	KNAT4	homeobox protein knotted-1-like 3 isoform X1 [Olea europaea var. sylvestris] [Olea europaea]	-	-	-	-	GO:0043231//intracellular membrane-bounded organelle;GO:0044444//cytoplasmic part	GO:0001071//nucleic acid binding transcription factor activity;GO:0005488//binding	GO:0009314//response to radiation;GO:0009720//detection of hormone stimulus;GO:0034097//response to cytokine;GO:0048856//anatomical structure development
Unigene0000524	1.957	4.193	3.557	0	0.73	4.773	8.173	0.03	--	PREDICTED: ribosomal RNA small subunit methyltransferase B isoform X2 [Nicotiana tabacum]	-	-	-	-	-	GO:0008173//RNA methyltransferase activity	GO:0000154//rRNA modification;GO:0006605//protein targeting;GO:0009657//plastid organization;GO:0010468//regulation of gene expression
Unigene0000526	0.04	0.85	0.3	0.14	0.397	0.433	0.193	0.73	--	-	-	-	-	-	-	-	-
Unigene0000527	3.833	3.07	3.173	3.653	3.677	3.23	4.337	3.33	--	Uroporphyrinogen III synthase UROS/HEM4 [Handroanthus impetiginosus]	-	-	-	-	-	-	-
Unigene0000528	10.88	0.817	3.83	18.497	8.107	1.13	1.923	9.163	--	BnaA05g17040D [Brassica napus]	-	-	-	-	-	-	-
Unigene0000529	1.017	0.287	4.737	0.313	1.387	0.133	3.283	0.19	RLP22	somatic embryogenesis receptor kinase 1 [Salvia splendens]	-	-	-	-	-	-	-
Unigene0000530	0.46	0.423	0.92	1.437	1.447	0.073	0.833	0.087	--	EIX receptor 1/2 [Salvia splendens]	-	-	-	-	-	-	-
Unigene0000531	0.303	0.367	0.21	0.123	0.337	0.483	0.81	0.18	--	-	-	-	-	-	-	-	-
Unigene0000532	5.743	0	0	0	1.2	0	0	0	--	-	-	-	-	-	-	-	-
Unigene0000533	0.397	0.09	0.757	0.197	0.37	0.24	0.513	0.083	--	-	-	-	-	-	-	-	-
Unigene0000534	33.06	29.713	29.95	47.74	57.123	10.94	12.58	38.767	--	Cyclin-dependent kinase [Handroanthus impetiginosus]	-	-	-	-	-	-	GO:0006950//response to stress;GO:0009628//response to abiotic stimulus;GO:0009719//response to endogenous stimulus;GO:0010033//response to organic substance;GO:0035556//intracellular signal transduction
Unigene0000535	5.62	1.243	3.507	7.02	5.67	1.923	0	6.887	--	-	-	-	-	-	-	-	-
Unigene0000536	0.06	0	0	3.677	0.173	0	0	2.487	--	-	-	-	-	-	-	-	-
Unigene0000537	4.007	2.287	2.457	1.937	2.497	1.44	1.81	0.973	UPS1	PREDICTED: F-box/kelch-repeat protein SKIP25-like [Nicotiana attenuata]	-	-	-	-	GO:0043231//intracellular membrane-bounded organelle	GO:0005488//binding	GO:0009628//response to abiotic stimulus
Unigene0000538	0.283	0	0.117	0.33	0.08	0	0.21	0.907	--	cytochrome P450 CYP71AT92 [Salvia miltiorrhiza]	-	-	-	-	-	GO:0016705//oxidoreductase activity, acting on paired donors, with incorporation or reduction of molecular oxygen;GO:0046872//metal ion binding	-
Unigene0000539	0.05	0	3.42	0	0.257	0.093	2.723	0	CYP71A1	perillyl alcohol and perillaldehyde synthase cytochrome P450 CYP71AT146 [Perilla frutescens]	-	-	-	-	-	GO:0016705//oxidoreductase activity, acting on paired donors, with incorporation or reduction of molecular oxygen;GO:0046872//metal ion binding	-
Unigene0000540	0.387	0.157	0.66	0.783	0.257	0.417	1.413	0.64	--	disease resistance RPP8-like protein 3 isoform X2 [Olea europaea var. sylvestris] [Olea europaea]	-	-	-	-	-	-	-
Unigene0000541	8.363	7.79	7.577	7.943	6.867	4.077	6.833	6.067	SCL14	scarecrow-like protein 14 [Sesamum indicum]	-	-	-	-	-	-	GO:0010467//gene expression;GO:0034645//cellular macromolecule biosynthetic process
Unigene0000542	0	5.58	5.973	0.033	0	5.443	0.013	0.013	LSF1	large subunit ribosomal protein L28e [Salvia splendens]	Genetic Information Processing	Translation	ko03010//Ribosome	K02903	GO:0005911//cell-cell junction;GO:0009536//plastid;GO:0015934//large ribosomal subunit;GO:0016020//membrane;GO:0030312//external encapsulating structure	GO:0005198//structural molecule activity	GO:0006221//pyrimidine nucleotide biosynthetic process;GO:0009451//RNA modification;GO:0009725//response to hormone;GO:0010467//gene expression;GO:0016571//histone methylation;GO:0022613//ribonucleoprotein complex biogenesis;GO:0048580//regulation of post-embryonic development
Unigene0000543	0	0.16	2.48	1.3	0.043	0.06	1.863	0.52	--	9-cis-epoxycarotenoid dioxygenase [Salvia splendens]	-	-	-	-	-	-	-
Unigene0000544	0.067	2.023	0.307	0.067	0.333	0.637	0.173	0.617	--	-	-	-	-	-	-	-	-
Unigene0000545	1.45	27.973	9.593	0.697	6.793	11.087	4.35	10.15	calub	calumenin-A-like [Rhodamnia argentea]	-	-	-	-	-	-	-
Unigene0000546	0.967	0.553	0.24	0.57	1.567	0.65	0	0.553	--	Retrovirus-related Pol polyprotein from transposon TNT 1-94 [Vitis vinifera]	-	-	-	-	-	GO:0003824//catalytic activity	-
Unigene0000547	2.117	4.713	3.16	2.7	2.313	1.76	3.827	2.97	GIP	Retrovirus-related Pol polyprotein from transposon TNT 1-94 [Vitis vinifera]	-	-	-	-	-	GO:0016787//hydrolase activity	-
Unigene0000548	0	0	2.947	0	0	0.023	1.68	0	--	-	-	-	-	-	-	-	-
Unigene0000549	12.063	5.113	10.59	11.09	10.603	7.3	12.453	9.88	GPAA1	glycosylphosphatidylinositol transamidase [Salvia splendens]	Metabolism;Metabolism	Global and overview maps;Glycan biosynthesis and metabolism	ko01100//Metabolic pathways;ko00563//Glycosylphosphatidylinositol(GPI)-anchor biosynthesis	K05289;K05289	GO:0043231//intracellular membrane-bounded organelle;GO:0044425//membrane part	-	-
Unigene0000550	3.523	9.197	2.85	3.257	2.513	9.677	3.787	2.343	nat9	N-acetyltransferase 9-like protein isoform X1 [Sesamum indicum]	-	-	-	-	-	GO:0016407//acetyltransferase activity	-
Unigene0000551	2.427	0	0	0.047	0.73	0	0	0.04	FLS	flavonol synthase 1 [Salvia miltiorrhiza]	Metabolism;Metabolism;Metabolism	Global and overview maps;Global and overview maps;Biosynthesis of other secondary metabolites	ko01100//Metabolic pathways;ko01110//Biosynthesis of secondary metabolites;ko00941//Flavonoid biosynthesis	K05278;K05278;K05278	GO:0044424//intracellular part	GO:0016706//oxidoreductase activity, acting on paired donors, with incorporation or reduction of molecular oxygen, 2-oxoglutarate as one donor, and incorporation of one atom each of oxygen into both donors;GO:0019842//vitamin binding;GO:0046914//transition metal ion binding	GO:0009411//response to UV;GO:0009617//response to bacterium;GO:0009725//response to hormone;GO:0034285//response to disaccharide;GO:0051553//flavone biosynthetic process
Unigene0000552	0.177	0.22	1.08	0.213	0.213	0.24	0.403	0.203	--	-	-	-	-	-	-	-	-
Unigene0000553	0.707	0.01	0.047	3.017	0.36	0	0.03	1.347	--	-	-	-	-	-	-	-	-
Unigene0000554	34.307	16.807	24.39	32.15	30.283	20.797	17.07	25.967	PUR5	phosphoribosylformylglycinamidine cyclo-ligase [Salvia splendens]	Metabolism;Metabolism;Metabolism	Global and overview maps;Global and overview maps;Nucleotide metabolism	ko01100//Metabolic pathways;ko01110//Biosynthesis of secondary metabolites;ko00230//Purine metabolism	K01933;K01933;K01933	GO:0009532//plastid stroma	GO:0016741//transferase activity, transferring one-carbon groups;GO:0016882//cyclo-ligase activity;GO:0032550//purine ribonucleoside binding;GO:0046914//transition metal ion binding	GO:0006188//IMP biosynthetic process;GO:0006221//pyrimidine nucleotide biosynthetic process;GO:0006743//ubiquinone metabolic process
Unigene0000555	2.593	0.92	1.417	1.897	3.92	1.21	2.63	3.513	--	Molybdenum cofactor sulfurase, partial [Handroanthus impetiginosus]	-	-	-	-	GO:0009536//plastid;GO:0016020//membrane	GO:0003824//catalytic activity;GO:0043168//anion binding	-
Unigene0000556	0.667	0.423	0	0.103	0.32	0	0	0.057	--	-	-	-	-	-	-	-	-
Unigene0000557	6.433	1.373	4.953	4.633	2.203	1.787	5.613	4.347	R1B-16	NBS-LRR class resistance protein Fy12-Ry1, partial [Sesamum indicum]	-	-	-	-	-	-	-
Unigene0000558	1.123	0.423	0.57	0.947	2.033	0.473	0.817	0.35	RPP13L4	NBS-LRR class resistance protein Fy12-Ry12, partial [Sesamum indicum]	-	-	-	-	-	-	-
Unigene0000559	0.977	0	0	3.087	3.847	0	0	2.933	--	PREDICTED: probable linoleate 9S-lipoxygenase 5 isoform X1 [Daucus carota subsp. sativus] [Daucus carota]	-	-	-	-	-	-	-
Unigene0000560	0.803	4.317	2.523	0.073	1.253	2.153	0.72	2.63	LIP	lipase-like isoform X1 [Lactuca sativa]	-	-	-	-	-	-	-
Unigene0000561	45.51	21.17	37.833	38.627	52.167	27.97	48.127	39.903	HSP70-14	heat shock 70 kDa protein 14 [Sesamum indicum]	-	-	-	-	GO:0016020//membrane;GO:0043231//intracellular membrane-bounded organelle;GO:0044444//cytoplasmic part	GO:0016628//oxidoreductase activity, acting on the CH-CH group of donors, NAD or NADP as acceptor;GO:0032550//purine ribonucleoside binding	GO:0006950//response to stress;GO:0010038//response to metal ion;GO:0044710//single-organism metabolic process
Unigene0000562	0.7	3.197	0.51	0.483	0.55	1.367	0.107	0.447	GIP	Retrovirus-related Pol polyprotein from transposon TNT 1-94 [Vitis vinifera]	Genetic Information Processing	Transcription	ko03020//RNA polymerase	K03006	-	GO:0016787//hydrolase activity	-
Unigene0000563	0.873	0.257	0	2.133	0.167	0.273	0	0.883	--	protein S-acyltransferase 18 isoform X2 [Ipomoea triloba]	-	-	-	-	-	-	-
Unigene0000564	0.28	0.203	0.993	3.19	0.23	0.377	0.23	2.727	PTC52	Rieske-type oxygenase [Scutellaria baicalensis]	-	-	-	-	GO:0009528//plastid inner membrane;GO:0031224//intrinsic component of membrane	GO:0016703//oxidoreductase activity, acting on single donors with incorporation of molecular oxygen, incorporation of one atom of oxygen (internal monooxygenases or internal mixed function oxidases);GO:0043169//cation binding;GO:0051536//iron-sulfur cluster binding	GO:0008104//protein localization;GO:0044710//single-organism metabolic process
Unigene0000565	0.55	0.137	0.51	0.23	0.52	0.81	0.427	0.32	--	-	-	-	-	-	-	-	-
Unigene0000566	18.23	13.963	25.85	17.893	12.987	8.417	20.993	12.677	SRD2	snRNA-activating protein complex subunit 3 [Salvia splendens]	-	-	-	-	-	-	-
Unigene0000568	0.41	0.25	0.26	0.997	0.963	0.08	1.48	0.643	--	pentatricopeptide repeat protein [Salvia miltiorrhiza]	-	-	-	-	-	-	-
Unigene0000569	0.257	0.053	2.487	0.213	0.147	0.083	6.98	0.39	--	pentatricopeptide repeat protein [Salvia miltiorrhiza]	-	-	-	-	-	-	-
Unigene0000570	0.513	0.187	2.003	0.143	0.477	0.24	1.79	0.09	--	pentatricopeptide repeat protein [Salvia miltiorrhiza]	-	-	-	-	-	-	-
Unigene0000572	0.5	0.05	0.373	0.617	0.293	0.343	0.85	0.093	--	pentatricopeptide repeat protein [Salvia miltiorrhiza]	-	-	-	-	-	-	-
Unigene0000574	1.473	0.037	0.12	1.297	1.243	0.143	0.98	0.787	--	pentatricopeptide repeat protein [Salvia miltiorrhiza]	-	-	-	-	-	-	-
Unigene0000575	1.307	0.097	0.653	1.503	1.353	0.41	0.897	1.643	--	pentatricopeptide repeat protein [Salvia miltiorrhiza]	-	-	-	-	-	-	-
Unigene0000576	1.673	0.45	1.683	2.84	1.89	0.497	1.28	2.223	--	pentatricopeptide repeat protein [Salvia miltiorrhiza]	-	-	-	-	-	-	-
Unigene0000577	2.073	0.353	2.617	2.327	1.12	0.963	4.21	1.957	--	pentatricopeptide repeat protein [Salvia miltiorrhiza]	-	-	-	-	-	-	-
Unigene0000579	2.913	1.413	1.747	4.177	3.487	1.28	2.61	2.537	At1g12700	pentatricopeptide repeat protein [Salvia miltiorrhiza]	-	-	-	-	-	-	-
Unigene0000581	1.57	1.783	1.36	1.377	0.89	1.23	3.493	0.837	--	pentatricopeptide repeat protein [Salvia miltiorrhiza]	-	-	-	-	-	-	-
Unigene0000582	0.487	0.097	0.157	0.853	0.133	0.073	0.253	0.403	--	pentatricopeptide repeat protein [Salvia miltiorrhiza]	-	-	-	-	-	-	-
Unigene0000583	1.227	0.763	1.37	2.853	0.72	0.88	2.68	1.48	--	pentatricopeptide repeat protein [Salvia miltiorrhiza]	-	-	-	-	-	-	-
Unigene0000584	0.85	0.053	0.527	0.313	0.503	0.13	0.91	0.257	--	pentatricopeptide repeat protein [Salvia miltiorrhiza]	-	-	-	-	-	-	-
Unigene0000585	5.52	2.32	6.877	10.227	4.307	3.687	10.613	8.657	--	pentatricopeptide repeat protein [Salvia miltiorrhiza]	-	-	-	-	-	-	-
Unigene0000586	0.083	0.083	1.303	0.177	0.037	0.067	1.927	0.31	--	sister chromatid cohesion 1 protein 4 [Sesamum indicum]	-	-	-	-	-	-	-
Unigene0000587	1.237	0.677	1.967	1.09	0.317	0.573	1.65	0.583	--	-	-	-	-	-	-	-	-
Unigene0000588	3.913	4.637	3.587	4.353	2.63	2.857	4.32	2.817	--	-	-	-	-	-	-	-	-
Unigene0000589	8.537	7.4	8.273	7.117	4.497	4.41	6.723	5.493	At4g37920	PREDICTED: At4g37920 chloroplastic [Prunus dulcis]	-	-	-	-	GO:0044434//chloroplast part	-	GO:0008652//cellular amino acid biosynthetic process
Unigene0000590	0	0	0	1.57	0	0	0	1.983	--	-	-	-	-	-	-	-	-
Unigene0000592	0.41	5.88	2.997	0.287	0.853	2.94	0.827	1.88	--	-	-	-	-	-	-	-	-
Unigene0000593	0.023	1.96	0.847	0.183	0.363	0.5	0.357	0.517	Mapk9	stress-activated protein kinase JNK-like [Rhodamnia argentea]	Organismal Systems;Environmental Information Processing	Environmental adaptation;Signal transduction	ko04626//Plant-pathogen interaction;ko04016//MAPK signaling pathway - plant	K20536;K20536	-	GO:0004674//protein serine/threonine kinase activity;GO:0005488//binding	GO:0006464//cellular protein modification process;GO:0006796//phosphate-containing compound metabolic process;GO:0006952//defense response;GO:0006970//response to osmotic stress;GO:0009058//biosynthetic process;GO:0009751//response to salicylic acid;GO:0009755//hormone-mediated signaling pathway;GO:0009791//post-embryonic development;GO:0012501//programmed cell death;GO:0016043//cellular componen…
Unigene0000594	0.563	0.81	2.903	0.44	0.34	0.57	3.067	0.853	R1B-12	Apoptotic ATPase [Handroanthus impetiginosus]	-	-	-	-	-	-	-
Unigene0000595	1.41	0	0	0.587	0.99	0	0	0.563	--	-	-	-	-	-	-	-	-
Unigene0000596	15.07	3.443	33.31	24.377	7.607	6.073	19.417	13.277	FKBP43	peptidyl-prolyl cis-trans isomerase FKBP53-like [Sesamum indicum]	-	-	-	-	-	-	-
Unigene0000597	0	2.98	0	0	0	3.087	0	0	RPL9B	large subunit ribosomal protein L9e [Salvia splendens]	Genetic Information Processing	Translation	ko03010//Ribosome	K02940	GO:0005911//cell-cell junction;GO:0009536//plastid;GO:0015934//large ribosomal subunit;GO:0031090//organelle membrane	GO:0003723//RNA binding;GO:0005198//structural molecule activity	GO:0009451//RNA modification;GO:0010467//gene expression
Unigene0000599	0.503	9.23	4.897	0.323	2.137	3.137	1.39	4.08	GBF1	pattern formation EMB30-like, partial [Trebouxia sp. A1-2]	Cellular Processes	Transport and catabolism	ko04144//Endocytosis	K18443	GO:0044464//cell part	-	GO:0003006//developmental process involved in reproduction;GO:0006996//organelle organization;GO:0009653//anatomical structure morphogenesis;GO:0009791//post-embryonic development;GO:0009888//tissue development;GO:0016192//vesicle-mediated transport;GO:0044763//single-organism cellular process;GO:0044765//single-organism transport;GO:0048513//animal organ development;GO:0050794//regulation of cel…
Unigene0000600	4.387	6.317	3.677	5.363	4.18	3.457	3.803	4.14	--	eukaryotic translation initiation factor 5B-like [Olea europaea var. sylvestris] [Olea europaea]	-	-	-	-	-	-	-
Unigene0000601	0.033	0	0	1.513	0	0	0	0.92	--	-	-	-	-	-	-	-	-
Unigene0000602	8.483	1.273	2.497	6.46	4.62	0.687	1.6	4.09	--	transcription initiation factor TFIIE subunit beta [Salvia splendens]	Genetic Information Processing	Transcription	ko03022//Basal transcription factors	K03137	GO:0044451//nucleoplasm part	-	GO:0006352//DNA-templated transcription, initiation;GO:0006412//translation;GO:0008380//RNA splicing
Unigene0000603	0.043	0	0	2.51	0	0	0	3.923	--	-	-	-	-	-	-	-	-
Unigene0000604	0	0.21	0	1.377	0	0.1	0	0.793	--	-	-	-	-	-	-	-	-
Unigene0000605	32.923	23.46	21.25	16.633	32.24	8.517	17.193	20.363	STC	sugar carrier protein C [Sesamum indicum]	-	-	-	-	GO:0005911//cell-cell junction;GO:0031224//intrinsic component of membrane;GO:0043231//intracellular membrane-bounded organelle	GO:0005402//cation:sugar symporter activity;GO:0016628//oxidoreductase activity, acting on the CH-CH group of donors, NAD or NADP as acceptor	GO:0006812//cation transport;GO:0008643//carbohydrate transport;GO:0009725//response to hormone;GO:0009814//defense response, incompatible interaction;GO:0016049//cell growth;GO:0044710//single-organism metabolic process
Unigene0000606	0	0.09	1.187	0	0	0.073	0.503	0	--	-	-	-	-	-	-	-	-
Unigene0000607	2.283	0.46	2.237	2.257	1.183	0.79	2.053	1.683	sedl-1	PREDICTED: transport protein particle 20 kDa subunit [Erythranthe guttata]	-	-	-	-	GO:0044464//cell part	-	GO:0016482//cytoplasmic transport;GO:0050794//regulation of cellular process
Unigene0000609	0.597	6.547	4.157	0.253	1.71	2.687	0.91	3.333	GOLGA4	hypothetical protein GUITHDRAFT_109770 [Guillardia theta CCMP2712]	-	-	-	-	-	-	-
Unigene0000610	0.043	0.047	1.553	0.063	0.103	0.073	2.53	0.03	--	Retrovirus-related Pol polyprotein from transposon RE1 [Vitis vinifera]	-	-	-	-	-	GO:0046914//transition metal ion binding	-
Unigene0000611	0	3.153	2.183	1.397	0	7.577	0	2.07	At1g58602	NBS-LRR type resistance protein [Striga asiatica]	-	-	-	-	-	-	-
Unigene0000612	0.037	0.02	0.4	1.907	0.037	0	0.473	0.773	--	-	-	-	-	-	-	-	-
Unigene0000613	50.31	22.06	37.027	37.693	42.433	27.347	49.107	34.97	UBQ3	large subunit ribosomal protein L40e [Salvia splendens]	-	-	-	-	GO:0005911//cell-cell junction;GO:0015935//small ribosomal subunit;GO:0016020//membrane;GO:0043231//intracellular membrane-bounded organelle	GO:0005198//structural molecule activity;GO:0016491//oxidoreductase activity;GO:0046914//transition metal ion binding	GO:0006801//superoxide metabolic process;GO:0009117//nucleotide metabolic process;GO:0009664//plant-type cell wall organization;GO:0010383//cell wall polysaccharide metabolic process;GO:0016458//gene silencing;GO:0016567//protein ubiquitination;GO:0019941//modification-dependent protein catabolic process;GO:0034968//histone lysine methylation
Unigene0000614	0	0	0.047	1.457	0.04	0.147	0.047	1.373	--	-	-	-	-	-	-	-	-
Unigene0000615	21.58	4.663	0	10.5	10.843	4.353	0	7.207	--	-	-	-	-	-	-	-	-
Unigene0000616	0.29	0.05	1.527	0.073	0.1	0.22	1.287	0.023	--	-	-	-	-	-	-	-	-
Unigene0000617	0.54	6.19	4.647	0.187	1.25	2.797	1.037	2.457	F35H12.5	hypothetical protein FNF27_03199 [Cafeteria roenbergensis]	-	-	-	-	-	-	-
Unigene0000618	9.723	0	7.853	0.033	1.16	0	0	0	RF9	PREDICTED: probable disease resistance RPP8-like protein 4 [Erythranthe guttata]	-	-	-	-	-	-	-
Unigene0000619	0.267	0	0	0.41	0.577	0	0	0.74	--	-	-	-	-	-	-	-	-
Unigene0000620	0.247	0.65	0.25	0.377	0.513	0.71	0.29	0.477	--	-	-	-	-	-	-	-	-
Unigene0000621	0.17	1.047	0.263	2.423	0.273	1.213	0.077	1.797	--	pre-mRNA-processing factor 40 [Salvia splendens]	-	-	-	-	-	-	-
Unigene0000622	3.777	0.833	2.817	1.95	1.48	1.083	1.59	1.483	--	transcription termination factor MTERF2, chloroplastic-like [Sesamum indicum]	-	-	-	-	-	-	-
Unigene0000623	0.53	8.157	3.57	0.21	1.48	3.077	1.24	3.28	dhc-1	dynein heavy chain, cytoplasmic-like [Rhodamnia argentea]	Cellular Processes	Transport and catabolism	ko04145//Phagosome	K10414	GO:0030286//dynein complex;GO:0032838//cell projection cytoplasm;GO:0044441//ciliary part	GO:0017111//nucleoside-triphosphatase activity;GO:0097159//organic cyclic compound binding;GO:1901363//heterocyclic compound binding	GO:0030030//cell projection organization;GO:0044767//single-organism developmental process;GO:0051179//localization
Unigene0000624	0.367	2.37	1.643	0.103	0.223	2.167	2.847	0.1	Pol	Transposon TX1 149 kDa protein [Glycine soja]	-	-	-	-	-	-	-
Unigene0000625	2.663	52.123	92.323	5.857	3.26	13.337	9.547	35.59	--	-	-	-	-	-	-	-	-
Unigene0000626	1.093	0.277	0.61	1.597	1.547	0.317	1.103	2.513	--	protein lingerer-like [Dorcoceras hygrometricum]	-	-	-	-	-	-	-
Unigene0000627	5.17	2.34	0.193	6.183	10.317	1.65	0.613	8.117	--	-	-	-	-	-	-	-	-
Unigene0000628	1.237	0.073	0.053	0.337	0.51	0.057	0.047	0.347	--	Retrovirus-related Pol polyprotein from transposon TNT 1-94 [Cucumis melo var. makuwa] [Cucumis melo]	-	-	-	-	-	-	-
Unigene0000629	0	2.707	2.623	0.227	0	0.463	0.833	0.94	F38B2.4	adenylate kinase [Chloropicon primus]	Metabolism;Metabolism	Global and overview maps;Nucleotide metabolism	ko01100//Metabolic pathways;ko00240//Pyrimidine metabolism	K13800;K13800	GO:0005576//extracellular region;GO:0043231//intracellular membrane-bounded organelle;GO:0044444//cytoplasmic part	GO:0016776//phosphotransferase activity, phosphate group as acceptor;GO:0019201//nucleotide kinase activity;GO:0032550//purine ribonucleoside binding	GO:0006220//pyrimidine nucleotide metabolic process;GO:0009129//pyrimidine nucleoside monophosphate metabolic process;GO:0009165//nucleotide biosynthetic process;GO:0072528//pyrimidine-containing compound biosynthetic process
Unigene0000630	0.197	0.24	0	3.9	0.057	0.363	0	2.467	--	-	-	-	-	-	-	-	-
Unigene0000631	0.09	6.677	0.643	0.033	0.407	1.143	0.3	0.557	cla-1	-	-	-	-	-	-	-	-
Unigene0000632	0	1.717	0.423	0	0.313	0.733	0.077	0.437	dig-1	-	-	-	-	-	-	-	-
Unigene0000633	21.333	6.12	26.337	19.94	14.14	10.027	17.453	15.673	--	remorin-like [Sesamum indicum]	-	-	-	-	-	-	-
Unigene0000634	2.64	0.61	0.35	0.473	2.033	0.497	0.863	1.193	At1g65750	DNA replication ATP-dependent helicase/nuclease DNA2 [Glycine soja]	-	-	-	-	-	-	-
Unigene0000635	0.017	0.017	2.13	0	0.03	0.08	4.883	0	--	-	-	-	-	-	-	-	-
Unigene0000636	1.263	1.637	23.457	0.13	23.213	8.037	54.013	0.22	ACT	acyltransferase ACT2 [Plectranthus barbatus]	-	-	-	-	-	GO:0016746//transferase activity, transferring acyl groups	GO:0009813//flavonoid biosynthetic process;GO:0044699//single-organism process
Unigene0000637	1.857	0.227	0.84	0	0.747	0.45	0.573	0	--	-	-	-	-	-	-	-	-
Unigene0000638	0.103	2.55	0.48	0.033	0.103	0.437	0.157	0.493	--	-	-	-	-	-	-	-	-
Unigene0000639	0.257	0	0	0.407	0.927	0	0	1.117	--	-	-	-	-	-	-	-	-
Unigene0000640	5.04	0.607	1.633	3.183	3.333	2.223	2.263	2.14	YLMG2	ylmG homolog protein 2, chloroplastic [Sesamum indicum]	-	-	-	-	GO:0009526//plastid envelope;GO:0016020//membrane	-	-
Unigene0000641	0.247	0.643	0.48	0.347	0.457	0.713	1.117	0.31	--	GPN-loop GTPase [Striga asiatica]	-	-	-	-	-	-	-
Unigene0000642	6.327	2.867	6.97	7.083	7.723	3.857	7.703	5.333	LSH6	protein LIGHT-DEPENDENT SHORT HYPOCOTYLS 6-like [Abrus precatorius]	-	-	-	-	GO:0043231//intracellular membrane-bounded organelle	GO:0003676//nucleic acid binding	GO:0006351//transcription, DNA-templated;GO:0009653//anatomical structure morphogenesis;GO:0010468//regulation of gene expression;GO:0044707//single-multicellular organism process
Unigene0000643	0.083	4.79	5.57	0.123	0.043	9.18	15.73	0.177	--	-	-	-	-	-	-	-	-
Unigene0000644	0.873	0.587	1.803	2.58	1.263	0.22	1.323	1.9	--	-	-	-	-	-	-	-	-
Unigene0000645	1.1	0.447	1.28	1.48	1.357	0.53	1.087	1.383	--	CW [Trema orientale]	-	-	-	-	GO:0043231//intracellular membrane-bounded organelle	-	-
Unigene0000646	2.47	2.377	1.983	2.75	1.333	1.427	3.087	1.693	--	-	-	-	-	-	-	-	-
Unigene0000647	12.66	3.707	8.547	2.307	10.353	2.623	2.177	1.837	JMJ16	histone demethylase JARID1 [Salvia splendens]	-	-	-	-	GO:0043231//intracellular membrane-bounded organelle	GO:0001071//nucleic acid binding transcription factor activity;GO:0016491//oxidoreductase activity;GO:0016741//transferase activity, transferring one-carbon groups;GO:0043169//cation binding	GO:0003006//developmental process involved in reproduction;GO:0006325//chromatin organization;GO:0006355//regulation of transcription, DNA-templated;GO:0009606//tropism;GO:0018205//peptidyl-lysine modification;GO:0042743//hydrogen peroxide metabolic process;GO:0044710//single-organism metabolic process;GO:0045491//xylan metabolic process
Unigene0000648	67.563	25.923	44.173	52.23	58.043	32.977	49.25	41.367	HSR201	(Z)-3-hexen-1-ol acetyltransferase [Salvia splendens]	-	-	-	-	-	GO:0016413//O-acetyltransferase activity	-
Unigene0000649	0.36	0.04	0.327	1.63	0.44	0.02	0.513	1.257	TCX5	Retrovirus-related Pol polyprotein from transposon gypsy [Vitis vinifera]	-	-	-	-	-	-	-
Unigene0000650	0.057	0.413	0.143	0	0.177	0.21	0	0.247	--	-	-	-	-	-	-	-	-
Unigene0000652	0.09	0	0.65	0.053	0.09	0	2.88	0	--	-	-	-	-	-	-	-	-
Unigene0000653	10.193	2.487	7.757	8.71	13.83	4.84	11.77	9.99	PLA1	phospholipase A I [Sesamum indicum]	-	-	-	-	GO:0009536//plastid	GO:0016298//lipase activity	GO:0003006//developmental process involved in reproduction;GO:0006629//lipid metabolic process;GO:0009620//response to fungus;GO:0009694//jasmonic acid metabolic process;GO:0018205//peptidyl-lysine modification;GO:0042743//hydrogen peroxide metabolic process
Unigene0000655	10.373	0.773	5.993	8.397	14.52	4.87	10.793	13.633	KIN5D	kinesin family member 11 [Salvia splendens]	-	-	-	-	-	-	-
Unigene0000656	1.31	10.917	8.68	1.06	3.387	5.337	3.313	22.41	--	protein TAR1-like [Cicer arietinum]	-	-	-	-	-	-	-
Unigene0000657	1.74	0.33	0.557	1.517	1.143	0.527	1.227	0.893	--	pentatricopeptide repeat protein [Salvia miltiorrhiza]	-	-	-	-	-	-	-
Unigene0000658	0.36	0.063	0.787	0.383	0.313	0.1	0.467	0.263	--	pentatricopeptide repeat protein [Salvia miltiorrhiza]	-	-	-	-	-	-	-
Unigene0000659	0.747	0.053	0.213	0.903	0.807	0.02	0.193	0.95	--	pentatricopeptide repeat protein [Salvia miltiorrhiza]	-	-	-	-	-	-	-
Unigene0000660	0.743	0.1	0.05	0.343	0.96	0.257	0.04	0.613	At2g27800	pentatricopeptide repeat protein [Salvia miltiorrhiza]	-	-	-	-	-	-	-
Unigene0000661	1.517	0.133	0.65	0.84	0.99	0.583	0.993	0.683	At1g62680	pentatricopeptide repeat protein [Salvia miltiorrhiza]	-	-	-	-	GO:0043231//intracellular membrane-bounded organelle	-	-
Unigene0000662	0	1.117	0	0	0	2.3	0	0	--	pentatricopeptide repeat protein [Salvia miltiorrhiza]	-	-	-	-	-	-	-
Unigene0000663	1.533	0.11	0.943	1.02	0.547	0.317	1.71	0.627	--	pentatricopeptide repeat protein [Salvia miltiorrhiza]	-	-	-	-	-	-	-
Unigene0000665	1.073	0.37	0.263	0.783	0.407	0.14	0.763	0.837	--	pentatricopeptide repeat protein [Salvia miltiorrhiza]	-	-	-	-	-	-	-
Unigene0000666	0.227	0.143	0.573	0.253	0.15	0.057	0.667	0.233	--	pentatricopeptide repeat protein [Salvia miltiorrhiza]	-	-	-	-	-	-	-
Unigene0000668	0.37	0.243	0	0.833	0.447	0.187	0.05	0.44	--	pentatricopeptide repeat protein [Salvia miltiorrhiza]	-	-	-	-	-	-	-
Unigene0000669	0.477	0.037	0.863	0.497	0.267	0.09	1.12	0.443	--	pentatricopeptide repeat protein [Salvia miltiorrhiza]	-	-	-	-	-	-	-
Unigene0000670	0.47	0	2.523	0.11	0.13	0	5.38	0.267	At1g12775	pentatricopeptide repeat protein [Salvia miltiorrhiza]	-	-	-	-	-	-	-
Unigene0000671	0.44	0.04	3.047	0.657	0.527	0.09	5.05	0.917	--	pentatricopeptide repeat protein [Salvia miltiorrhiza]	-	-	-	-	-	-	-
Unigene0000672	2.407	0.587	1.25	2.563	2.597	0.883	3.183	2.78	At1g12700	pentatricopeptide repeat protein [Salvia miltiorrhiza]	-	-	-	-	-	-	-
Unigene0000673	0.627	0.113	0.463	0.737	0.22	0.34	0.037	0.61	--	pentatricopeptide repeat protein [Salvia miltiorrhiza]	-	-	-	-	-	-	-
Unigene0000675	1.223	0.163	0.453	0.813	0.587	0.187	0.81	0.403	--	pentatricopeptide repeat protein [Salvia miltiorrhiza]	-	-	-	-	-	-	-
Unigene0000676	0.87	0.433	0.473	0.387	0.93	0.56	0.42	0.183	--	pentatricopeptide repeat protein [Salvia miltiorrhiza]	-	-	-	-	-	-	-
Unigene0000677	0.743	0	0	2.05	0.397	0	0	1.307	--	-	-	-	-	-	-	-	-
Unigene0000678	2.507	0.017	1.323	2.057	1.487	0	0	1.787	--	-	-	-	-	-	-	-	-
Unigene0000679	0	0.353	1.417	0	0	0.2	2.817	0.01	--	-	-	-	-	-	-	-	-
Unigene0000680	0.503	0.06	0.43	1.407	1.333	0.143	0	0.733	--	-	-	-	-	-	-	-	-
Unigene0000681	0.43	0	0.58	0.833	0.64	0.747	0.927	0.887	--	-	-	-	-	-	-	-	-
Unigene0000683	0	0.343	1.383	0	0	0.147	1.817	0	--	-	-	-	-	-	-	-	-
Unigene0000684	0.153	0.043	0.86	0.193	0.793	0.133	0.083	0.433	--	disease resistance protein At4g27190-like [Sesamum indicum]	-	-	-	-	-	-	-
Unigene0000685	5.753	0.313	0.92	6.127	4.857	1.433	0.433	3.573	GT1	anthocyanidin 3-O-glucosyltransferase 2-like [Sesamum indicum]	-	-	-	-	GO:0043231//intracellular membrane-bounded organelle	GO:0035251//UDP-glucosyltransferase activity	GO:0009812//flavonoid metabolic process
Unigene0000686	0.853	0.33	0.313	0.78	0.57	0.203	0.263	0.52	--	-	-	-	-	-	-	-	-
Unigene0000687	3.47	0.17	2.383	2.257	4.027	0.187	0.203	2.5	PCMP-H24	pentatricopeptide repeat protein [Salvia miltiorrhiza]	-	-	-	-	-	-	-
Unigene0000688	2.273	1.667	0.22	12.767	1.5	2.85	0.163	11.743	ERL1	PREDICTED: LRR receptor-like serine/threonine-protein kinase ERL2 isoform X2 [Ipomoea nil]	Environmental Information Processing	Signal transduction	ko04016//MAPK signaling pathway - plant	K20718	-	-	-
Unigene0000689	0.043	0	0.817	0.087	0.017	0	1.497	0.147	--	-	-	-	-	-	-	-	-
Unigene0000690	0.083	2.51	0.88	0.063	0.223	0.557	0.287	0.377	CBG11716	Nat9 protein [Capsaspora owczarzaki ATCC 30864]	-	-	-	-	-	GO:0016746//transferase activity, transferring acyl groups	-
Unigene0000691	4.793	1.587	4.05	4.627	4.09	1.967	4.303	3.76	KAS	Ketoacyl-ACP Synthase II [Salvia miltiorrhiza]	Metabolism;Metabolism;Metabolism;Metabolism	Global and overview maps;Global and overview maps;Lipid metabolism;Metabolism of cofactors and vitamins	ko01100//Metabolic pathways;ko01212//Fatty acid metabolism;ko00061//Fatty acid biosynthesis;ko00780//Biotin metabolism	K09458;K09458;K09458;K09458	GO:0043231//intracellular membrane-bounded organelle	GO:0004312//fatty acid synthase activity	GO:0006631//fatty acid metabolic process;GO:0006950//response to stress;GO:0007275//multicellular organism development
Unigene0000692	0.167	0.173	0.803	0.113	0.257	0.203	0.397	0.12	--	-	-	-	-	-	-	-	-
Unigene0000693	1.223	6.043	4.293	0	0.407	4.57	8.493	0.027	RPL28A	large subunit ribosomal protein L28e [Salvia splendens]	Genetic Information Processing	Translation	ko03010//Ribosome	K02903	GO:0005911//cell-cell junction;GO:0009536//plastid;GO:0015934//large ribosomal subunit;GO:0016020//membrane;GO:0030312//external encapsulating structure	GO:0005198//structural molecule activity	GO:0006221//pyrimidine nucleotide biosynthetic process;GO:0009451//RNA modification;GO:0009725//response to hormone;GO:0010467//gene expression;GO:0016571//histone methylation;GO:0022613//ribonucleoprotein complex biogenesis;GO:0048580//regulation of post-embryonic development
Unigene0000694	5.353	2.21	4.94	8.157	2.593	2.017	4.497	5.763	RPP13	NBS-LRR class resistance protein Fy12-Ry1, partial [Sesamum indicum]	-	-	-	-	-	-	-
Unigene0000695	1	0.537	0.65	5.777	1.803	0.383	0.743	4.733	At1g50180	NBS-LRR class resistance protein Fy12-Ry12, partial [Sesamum indicum]	-	-	-	-	-	-	-
Unigene0000696	1.797	1.227	1.117	1.467	2.17	0.497	0	1.587	--	-	-	-	-	-	-	-	-
Unigene0000697	18.983	10.97	14.477	13.053	23.403	7.553	15.467	15.033	PHOX1	HSP-interacting protein [Sesamum indicum]	-	-	-	-	-	-	-
Unigene0000699	0.137	0.043	0.67	0.417	0.177	0.267	0.29	0.2	--	-	-	-	-	-	-	-	-
Unigene0000700	0.03	0.31	0.107	0	0.03	0.153	0	0.337	pad-1	-	-	-	-	-	-	-	-
Unigene0000701	0.373	6.44	3.283	0.163	1.197	2.273	0.85	2.543	pad-1	hypothetical protein SARC_07518 [Sphaeroforma arctica JP610]	-	-	-	-	-	-	-
Unigene0000702	0	1.813	4.263	0	0	0	0.567	0	--	-	-	-	-	-	-	-	-
Unigene0000703	0	3.173	0	0	0	0	0	0	--	-	-	-	-	-	-	-	-
Unigene0000704	1.327	0.54	1.057	0.947	1.41	0.31	1.727	0.857	--	-	-	-	-	-	-	-	-
Unigene0000705	50.75	22.463	56.573	52.273	27.427	29.097	35.667	37.33	Cbwd1	Cobalamin synthesis protein [Handroanthus impetiginosus]	-	-	-	-	GO:0009536//plastid	-	-
Unigene0000706	5.21	0.093	0.607	2.107	4.183	0.607	2.637	3.6	At4g14310	KIN14B-interacting protein At4g14310 [Sesamum indicum]	-	-	-	-	-	-	-
Unigene0000707	1.537	0.243	3.013	0.737	1.573	0.663	2.183	0.787	--	-	-	-	-	-	-	-	-
Unigene0000708	1.363	0	0	0	0.71	0	0	0	AK2	43kDa postsynaptic protein [Trema orientale]	-	-	-	-	-	-	-
Unigene0000709	0.773	0	0	1.907	0.817	0	0	0.627	--	-	-	-	-	-	-	-	-
Unigene0000710	0.523	0	0	0.277	0.107	0.047	0.06	0.113	--	-	-	-	-	-	-	-	-
Unigene0000711	9.507	1.203	4.487	4.933	14.347	1.507	7.263	4.77	--	gag protease polyprotein [Cucumis melo var. makuwa] [Cucumis melo]	-	-	-	-	-	-	-
Unigene0000713	0.18	7.08	3.66	0.503	0.86	3.36	0.873	1.76	cnnm-2	metal transporter CNNM4-like [Rhodamnia argentea]	-	-	-	-	-	-	-
Unigene0000714	7.977	0.027	6.14	0	6.503	0.03	9.097	0.027	HAKAI	60S ribosomal protein L12-1 [Vitis vinifera]	-	-	-	-	GO:0005911//cell-cell junction;GO:0009536//plastid;GO:0015934//large ribosomal subunit	GO:0003723//RNA binding;GO:0003824//catalytic activity;GO:0005198//structural molecule activity;GO:0046914//transition metal ion binding	GO:0006950//response to stress;GO:0009451//RNA modification;GO:0010467//gene expression;GO:0022613//ribonucleoprotein complex biogenesis
Unigene0000715	13	2.377	11.437	9.067	6.4	4.323	15.877	5.723	--	pollen Ole e 1 allergen and extensin family protein, partial [Erythranthe guttata]	-	-	-	-	-	-	-
Unigene0000716	0	0.273	0.887	0.693	0	0.147	0.917	0.923	--	-	-	-	-	-	-	-	-
Unigene0000717	0.393	0.177	1.333	0.233	0.72	0.203	2.013	0.527	--	-	-	-	-	-	-	-	-
Unigene0000718	0.853	0.333	0.373	0.417	0.14	0.19	0.227	0.49	URGT5	solute carrier family 35, member E3 [Salvia splendens]	-	-	-	-	GO:0031224//intrinsic component of membrane	-	-
Unigene0000719	0.367	4.42	2.117	0.143	0.897	1.693	0.61	1.863	heatr5b	protein SWEETIE-like isoform X3 [Physcomitrella patens]	-	-	-	-	-	-	GO:0044238//primary metabolic process;GO:0044260//cellular macromolecule metabolic process;GO:0044763//single-organism cellular process
Unigene0000720	0	3.53	0	0.02	0	3.36	0	0	--	guanine nucleotide-exchange factor [Salvia splendens]	-	-	-	-	-	-	-
Unigene0000721	0	1.99	0.02	0	0	3.9	0	0	XYL1	alpha-glucosidase [Salvia splendens]	-	-	-	-	GO:0005576//extracellular region;GO:0005618//cell wall;GO:0005911//cell-cell junction;GO:0009536//plastid	GO:0090599//alpha-glucosidase activity;GO:0097599//xylanase activity	GO:0000272//polysaccharide catabolic process;GO:0006073//cellular glucan metabolic process;GO:0010038//response to metal ion;GO:0042546//cell wall biogenesis;GO:0071555//cell wall organization
Unigene0000722	0.43	0.723	0.307	0.28	0.763	0.35	0.047	0.14	--	-	-	-	-	-	-	-	-
Unigene0000723	23.45	5.673	12.94	9.807	24.813	7.79	15.1	10.227	--	MAP7 domain-containing protein 1 [Sesamum indicum]	-	-	-	-	GO:0016020//membrane;GO:0044464//cell part	-	-
Unigene0000724	0	2.783	2.63	0	0	3.01	5.423	0	--	-	-	-	-	-	-	-	-
Unigene0000725	0.653	10.287	5.82	0.25	2.637	3.083	1.19	3.687	kcc-3	solute carrier family 12 member 4-like [Rhodamnia argentea]	-	-	-	-	-	-	GO:0006811//ion transport
Unigene0000726	29.51	8.1	28.123	18.717	17.217	13.113	36.967	11.943	--	Apoptotic ATPase [Handroanthus impetiginosus]	-	-	-	-	-	-	-
Unigene0000727	6.097	4.377	5.773	5.577	6.297	3.873	5.13	5.693	SAC3A	polyribonucleotide 5'-hydroxyl-kinase [Salvia splendens]	-	-	-	-	-	-	-
Unigene0000728	1.207	0.093	2.27	0.933	0.477	0.423	1.22	0.843	--	-	-	-	-	-	-	-	-
Unigene0000729	23.753	23.64	27.743	26.307	16.627	11.777	16.037	15.127	GAF1	PREDICTED: indeterminate-domain [Prunus dulcis]	-	-	-	-	-	GO:0043169//cation binding	-
Unigene0000730	11.887	16.953	10.57	4.673	9.687	1.86	11.357	4.317	RBCS	ribulose-bisphosphate carboxylase small chain [Salvia splendens]	Metabolism;Metabolism;Metabolism;Metabolism;Metabolism	Global and overview maps;Global and overview maps;Global and overview maps;Energy metabolism;Carbohydrate metabolism	ko01100//Metabolic pathways;ko01110//Biosynthesis of secondary metabolites;ko01200//Carbon metabolism;ko00710//Carbon fixation in photosynthetic organisms;ko00630//Glyoxylate and dicarboxylate metabolism	K01602;K01602;K01602;K01602;K01602	GO:0005576//extracellular region;GO:0005840//ribosome;GO:0009532//plastid stroma;GO:0042170//plastid membrane;GO:0044434//chloroplast part;GO:0044436//thylakoid part	GO:0016491//oxidoreductase activity;GO:0016831//carboxy-lyase activity;GO:0046914//transition metal ion binding	GO:0006950//response to stress;GO:0009639//response to red or far red light;GO:0015977//carbon fixation;GO:0043094//cellular metabolic compound salvage;GO:0070271//protein complex biogenesis
Unigene0000732	2.487	1.953	8.593	0.647	3.45	3.213	12.513	0.86	HSP70	heat shock cognate 70 kDa protein 2-like [Prosopis alba]	Genetic Information Processing;Genetic Information Processing;Cellular Processes	Folding, sorting and degradation;Transcription;Transport and catabolism	ko04141//Protein processing in endoplasmic reticulum;ko03040//Spliceosome;ko04144//Endocytosis	K03283;K03283;K03283	GO:0005576//extracellular region;GO:0030312//external encapsulating structure;GO:0031090//organelle membrane;GO:0043231//intracellular membrane-bounded organelle;GO:0044444//cytoplasmic part	GO:0016628//oxidoreductase activity, acting on the CH-CH group of donors, NAD or NADP as acceptor;GO:0032550//purine ribonucleoside binding;GO:0044389//ubiquitin-like protein ligase binding	GO:0010468//regulation of gene expression;GO:0032446//protein modification by small protein conjugation;GO:0033554//cellular response to stress;GO:0034645//cellular macromolecule biosynthetic process;GO:0044710//single-organism metabolic process
Unigene0000733	0.09	0.103	0.32	0.063	0.2	0.36	1.12	0.273	HSP70	probable mediator of RNA polymerase II transcription subunit 37c isoform X1 [Hevea brasiliensis]	Genetic Information Processing;Genetic Information Processing;Cellular Processes	Folding, sorting and degradation;Transcription;Transport and catabolism	ko04141//Protein processing in endoplasmic reticulum;ko03040//Spliceosome;ko04144//Endocytosis	K03283;K03283;K03283	GO:0005576//extracellular region;GO:0005840//ribosome;GO:0005911//cell-cell junction;GO:0009526//plastid envelope;GO:0030312//external encapsulating structure;GO:0031090//organelle membrane;GO:0031224//intrinsic component of membrane	GO:0016628//oxidoreductase activity, acting on the CH-CH group of donors, NAD or NADP as acceptor;GO:0032550//purine ribonucleoside binding;GO:0044389//ubiquitin-like protein ligase binding;GO:0046923//ER retention sequence binding	GO:0006006//glucose metabolic process;GO:0006090//pyruvate metabolic process;GO:0006972//hyperosmotic response;GO:0009617//response to bacterium;GO:0009620//response to fungus;GO:0010029//regulation of seed germination;GO:0010038//response to metal ion;GO:0010118//stomatal movement;GO:0010468//regulation of gene expression;GO:0032446//protein modification by small protein conjugation;GO:0033554//…
Unigene0000735	2.973	6.037	3.093	3.863	1.863	2.93	2.29	2.74	At2g42690	phospholipase A1-IIdelta-like [Ipomoea triloba]	-	-	-	-	GO:0009536//plastid	GO:0004620//phospholipase activity	GO:0000097//sulfur amino acid biosynthetic process;GO:0006970//response to osmotic stress;GO:0009247//glycolipid biosynthetic process;GO:0009267//cellular response to starvation;GO:0009746//response to hexose;GO:0010224//response to UV-B;GO:0016109//tetraterpenoid biosynthetic process;GO:0019758//glycosinolate biosynthetic process;GO:0042044//fluid transport
Unigene0000736	37.157	12.43	48.37	30.523	31.257	12.283	48.383	24.107	ORC2	origin of replication complex subunit 2 [Sesamum indicum]	-	-	-	-	GO:0043231//intracellular membrane-bounded organelle;GO:0043234//protein complex	GO:0043565//sequence-specific DNA binding	GO:0006259//DNA metabolic process
Unigene0000737	1.67	0.543	2.247	0.943	5.177	0.613	2.21	1.703	--	-	-	-	-	-	-	-	-
Unigene0000738	13.663	2.977	9.587	9.96	11.887	5.247	12.153	7.613	CCT2	T-complex protein 1 subunit beta [Sesamum indicum]	-	-	-	-	GO:0030312//external encapsulating structure;GO:0031225//anchored component of membrane;GO:0044444//cytoplasmic part	GO:0004672//protein kinase activity;GO:0005515//protein binding;GO:0032550//purine ribonucleoside binding	GO:0006006//glucose metabolic process;GO:0006464//cellular protein modification process;GO:0006996//organelle organization;GO:0016072//rRNA metabolic process;GO:0051603//proteolysis involved in cellular protein catabolic process;GO:0071555//cell wall organization
Unigene0000739	6.293	3.717	4.54	4.43	6.323	2.643	4.657	4.177	At4g10780	Apoptotic ATPase [Handroanthus impetiginosus]	Organismal Systems	Environmental adaptation	ko04626//Plant-pathogen interaction	K13459	-	-	-
Unigene0000740	9.833	1.297	6.627	4.2	3.37	1.21	4.51	2.2	--	-	-	-	-	-	-	-	-
Unigene0000741	0	2.453	0.113	0	0	4.507	1.07	0	PLIM2B	cysteine and glycine-rich protein [Salvia splendens]	-	-	-	-	-	GO:0043169//cation binding	-
Unigene0000742	90.777	78.717	52.713	81.013	96.227	28.977	58.883	58.717	PGD2	6-phosphogluconate dehydrogenase [Salvia splendens]	Metabolism;Metabolism;Metabolism;Metabolism;Metabolism	Global and overview maps;Global and overview maps;Global and overview maps;Metabolism of other amino acids;Carbohydrate metabolism	ko01100//Metabolic pathways;ko01110//Biosynthesis of secondary metabolites;ko01200//Carbon metabolism;ko00480//Glutathione metabolism;ko00030//Pentose phosphate pathway	K00033;K00033;K00033;K00033;K00033	GO:0009532//plastid stroma;GO:0042579//microbody	GO:0000166//nucleotide binding;GO:0016616//oxidoreductase activity, acting on the CH-OH group of donors, NAD or NADP as acceptor;GO:0048037//cofactor binding	GO:0006739//NADP metabolic process;GO:0006865//amino acid transport;GO:0006970//response to osmotic stress;GO:0009664//plant-type cell wall organization;GO:0009746//response to hexose;GO:0010383//cell wall polysaccharide metabolic process;GO:0016482//cytoplasmic transport;GO:0019520//aldonic acid metabolic process;GO:0032412//regulation of ion transmembrane transporter activity;GO:0034285//respon…
Unigene0000743	0.367	0.38	0.05	0.077	0.55	0	0.077	0	FRS5	protein FAR1-RELATED SEQUENCE 5-like [Coffea eugenioides]	-	-	-	-	-	-	-
Unigene0000744	0	0.287	1.057	0	0	0.353	1.14	0	--	-	-	-	-	-	-	-	-
Unigene0000745	2.32	26.243	14.667	1.373	6.547	11.073	4.16	14.407	fmr1	Fragile X mental retardation syndrome-related protein 1 [Hondaea fermentalgiana]	-	-	-	-	-	-	-
Unigene0000746	15.297	2.083	2.88	3.853	7.593	1.7	5.58	5.297	--	Phosphatidylinositol transfer protein PDR16 [Handroanthus impetiginosus]	-	-	-	-	GO:0043231//intracellular membrane-bounded organelle	-	-
Unigene0000747	0	5.91	0	0	0	0	0	0	LAC1	-	-	-	-	-	-	-	-
Unigene0000748	0.013	22.49	0.013	0	0	0	0.01	0	LAC1	laccase-2-like [Quercus suber]	Metabolism;Metabolism	Global and overview maps;Carbohydrate metabolism	ko01100//Metabolic pathways;ko00053//Ascorbate and aldarate metabolism	K00423;K00423	-	-	GO:0044710//single-organism metabolic process;GO:0071704//organic substance metabolic process
Unigene0000749	0	2.09	0	0	0	0	0	0	LAC1	laccase-2-like [Quercus suber]	-	-	-	-	-	-	-
Unigene0000750	4.64	6.477	0.047	0	3.103	5.56	0	0	--	-	-	-	-	-	-	-	-
Unigene0000751	79.827	0.56	0.057	10.38	29.967	0.203	0.24	6.127	--	-	-	-	-	-	-	-	-
Unigene0000752	0.147	2.113	0.523	0.06	0.183	0.46	0.103	0.05	--	-	-	-	-	-	-	-	-
Unigene0000753	0.5	6.487	2.99	0.15	1.75	3.36	0.987	3.553	Oplah	5-oxoprolinase [Capsaspora owczarzaki ATCC 30864]	Metabolism;Metabolism	Global and overview maps;Metabolism of other amino acids	ko01100//Metabolic pathways;ko00480//Glutathione metabolism	K01469;K01469	GO:0005911//cell-cell junction;GO:0044444//cytoplasmic part	GO:0016812//hydrolase activity, acting on carbon-nitrogen (but not peptide) bonds, in cyclic amides	GO:0006749//glutathione metabolic process
Unigene0000754	2.207	6.017	9.667	23406.7	0.047	12.897	26.377	29445.2	ORF1	-	-	-	-	-	-	-	-
Unigene0000755	24.313	62707.4	114.767	38.417	13.633	79611	60.66	51.603	ORF1	-	-	-	-	-	-	-	-
Unigene0000756	0	0	0	0	0.033	0	1.87	0	--	-	-	-	-	-	-	-	-
Unigene0000757	0	0.057	1.417	0.803	0.05	0.267	5.3	0.367	--	-	-	-	-	-	-	-	-
Unigene0000759	17.19	7.03	15.967	13.907	14.567	8.527	5.377	10.973	--	-	-	-	-	-	-	-	-
Unigene0000760	5.573	0.053	0.093	1.14	2.197	0.043	0.037	0.577	--	BRAP2 RING ZnF UBP domain-containing protein 2 [Pistacia vera]	-	-	-	-	-	-	-
Unigene0000761	6.003	0.53	0.927	9.977	7	0.147	0.023	6.97	NUP98A	nuclear pore complex protein NUP98A isoform X1 [Sesamum indicum]	Genetic Information Processing	Translation	ko03013//RNA transport	K14297	GO:0012505//endomembrane system;GO:0043231//intracellular membrane-bounded organelle	GO:0005488//binding	GO:0051234//establishment of localization
Unigene0000762	2.683	60.19	51.247	1.333	11.04	26.86	17.187	23.59	--	-	-	-	-	-	-	-	-
Unigene0000763	0	1.803	0	0	0	0.85	0	0	--	-	-	-	-	-	-	-	-
Unigene0000764	6.533	0.507	3.34	4.303	5.123	0.67	0.76	3.553	RGA1	Apoptotic ATPase [Handroanthus impetiginosus]	-	-	-	-	-	-	-
Unigene0000765	0.213	5.967	4.303	0.247	0.84	2.013	0.91	2.55	MAP4K3	mitogen-activated protein kinase kinase kinase kinase 5-like [Rhodamnia argentea]	-	-	-	-	-	-	-
Unigene0000766	0.887	11.727	22.667	1.72	1.42	10.467	46.42	1.17	ISY1	pre-mRNA-splicing factor ISY1 homolog, partial [Sesamum indicum]	Genetic Information Processing	Transcription	ko03040//Spliceosome	K12870	GO:0009536//plastid	-	-
Unigene0000767	4.18	3.413	4.727	3.527	1.65	2.087	6.113	2.843	At3g10130	heme-binding-like protein At3g10130, chloroplastic [Sesamum indicum]	-	-	-	-	GO:0044434//chloroplast part	-	GO:0044237//cellular metabolic process;GO:0044699//single-organism process;GO:0071704//organic substance metabolic process;GO:0071840//cellular component organization or biogenesis
Unigene0000768	61.767	54.137	70.063	60.527	59.037	53.207	84.537	52.097	AACT1	acetoacetyl-coenzyme A thiolase [Salvia miltiorrhiza]	Metabolism;Metabolism;Metabolism;Metabolism;Metabolism;Metabolism;Metabolism;Metabolism;Metabolism;Metabolism;Metabolism;Metabolism;Metabolism;Metabolism	Global and overview maps;Global and overview maps;Global and overview maps;Carbohydrate metabolism;Carbohydrate metabolism;Global and overview maps;Amino acid metabolism;Lipid metabolism;Amino acid metabolism;Carbohydrate metabolism;Metabolism of terpenoids and polyketides;Amino acid metabolism;Carbohydrate metabolism;Lipid metabolism	ko01100//Metabolic pathways;ko01110//Biosynthesis of secondary metabolites;ko01200//Carbon metabolism;ko00620//Pyruvate metabolism;ko00630//Glyoxylate and dicarboxylate metabolism;ko01212//Fatty acid metabolism;ko00280//Valine, leucine and isoleucine degradation;ko00071//Fatty acid degradation;ko00380//Tryptophan metabolism;ko00640//Propanoate metabolism;ko00900//Terpenoid backbone biosynthesis;k…	K00626;K00626;K00626;K00626;K00626;K00626;K00626;K00626;K00626;K00626;K00626;K00626;K00626;K00626	GO:0016020//membrane;GO:0042579//microbody	GO:0003988//acetyl-CoA C-acyltransferase activity;GO:0043169//cation binding	GO:0000904//cell morphogenesis involved in differentiation;GO:0003006//developmental process involved in reproduction;GO:0006084//acetyl-CoA metabolic process;GO:0016104//triterpenoid biosynthetic process;GO:0016129//phytosteroid biosynthetic process;GO:0044707//single-multicellular organism process
Unigene0000769	4.383	2.217	2.477	3.143	2.607	2.227	2.673	2.663	RGA4	Apoptotic ATPase [Handroanthus impetiginosus]	-	-	-	-	-	-	-
Unigene0000770	102.983	47.83	84.687	161.233	94.927	49.42	71.533	58.61	CBDAS2	cannabidiolic acid synthase-like [Sesamum indicum]	-	-	-	-	-	GO:0016614//oxidoreductase activity, acting on CH-OH group of donors	-
Unigene0000771	0.703	0.24	0.477	0.59	0.917	0.18	0.103	0.513	--	-	-	-	-	-	-	-	-
Unigene0000772	0.323	5.033	2.187	0.063	0.963	2.283	0.813	2.347	UTP23	rRNA-processing protein UTP23-like [Symbiodinium microadriaticum]	-	-	-	-	-	-	-
Unigene0000773	0.38	7.203	2.53	0.163	1.023	2.41	0.363	2.037	--	hypothetical protein CAOG_08823 [Capsaspora owczarzaki ATCC 30864]	-	-	-	-	-	-	-
Unigene0000774	0	0.987	0.627	0.053	0.257	0.187	0.21	0.223	--	-	-	-	-	-	-	-	-
Unigene0000775	0.783	7.937	5.173	0.6	1.673	2.877	1.07	3.21	coq-4	ubiquinone biosynthesis protein coq4, mitochondrial-like [Quercus suber]	-	-	-	-	-	-	-
Unigene0000776	0.993	10.253	7.437	0.547	2.113	3.673	1.46	4.25	sptl-1	serine palmitoyltransferase subunit 1 [Capsaspora owczarzaki ATCC 30864]	Metabolism;Metabolism	Global and overview maps;Lipid metabolism	ko01100//Metabolic pathways;ko00600//Sphingolipid metabolism	K00654;K00654	GO:0016020//membrane;GO:0043231//intracellular membrane-bounded organelle;GO:0044444//cytoplasmic part	GO:0005488//binding;GO:0016454//C-palmitoyltransferase activity	GO:0006665//sphingolipid metabolic process;GO:0010038//response to metal ion;GO:0012501//programmed cell death;GO:0040007//growth
Unigene0000777	2.247	0	0.227	3.407	3.453	0.457	1.287	5.157	--	-	-	-	-	-	-	-	-
Unigene0000778	0.733	8.56	4.967	0.643	1.737	3.137	1.403	3.16	pdxk-1	pyridoxal kinase [Triticum aestivum]	Metabolism;Metabolism	Global and overview maps;Metabolism of cofactors and vitamins	ko01100//Metabolic pathways;ko00750//Vitamin B6 metabolism	K00868;K00868	GO:0044444//cytoplasmic part	GO:0016301//kinase activity	GO:0006767//water-soluble vitamin metabolic process;GO:0006972//hyperosmotic response;GO:0010053//root epidermal cell differentiation;GO:0042823//pyridoxal phosphate biosynthetic process
Unigene0000779	0.69	0.393	0.5	0	0.28	0.647	0.273	0	--	-	-	-	-	-	-	-	-
Unigene0000780	2.18	1.393	2.473	2.503	1.617	1.427	2.483	1.94	KEA3	peptide-methionine (R)-S-oxide reductase [Salvia splendens]	-	-	-	-	GO:0031224//intrinsic component of membrane;GO:0042170//plastid membrane	GO:0005451//monovalent cation:proton antiporter activity;GO:0046873//metal ion transmembrane transporter activity	GO:0006468//protein phosphorylation;GO:0015992//proton transport;GO:0030001//metal ion transport;GO:0043269//regulation of ion transport;GO:0044763//single-organism cellular process
Unigene0000781	1.07	9.393	7.533	0.643	3.117	5.45	1.753	7.18	SLC9A8	sodium/hydrogen exchanger 8 [Capsaspora owczarzaki ATCC 30864]	-	-	-	-	-	GO:0015297//antiporter activity	GO:0015672//monovalent inorganic cation transport;GO:0044763//single-organism cellular process
Unigene0000782	0.723	10.847	6.18	0.553	2.763	5.13	1.853	5.77	ubr-1	E3 ubiquitin-protein ligase ubr1-like [Quercus suber]	-	-	-	-	-	-	GO:0071704//organic substance metabolic process
Unigene0000783	0.11	3.207	0.85	0.107	0.423	1.02	0.397	1.05	--	-	-	-	-	-	-	-	-
Unigene0000784	0	2.153	0.01	0	0	3.65	0.017	0	R1A-10	Apoptotic ATPase [Handroanthus impetiginosus]	-	-	-	-	-	-	-
Unigene0000785	26.273	10.57	18.723	23.547	18.707	14.053	24.73	21.18	NRPE7	DNA-directed RNA polymerase V subunit 7 [Sesamum indicum]	-	-	-	-	-	GO:0016772//transferase activity, transferring phosphorus-containing groups	GO:0019538//protein metabolic process;GO:0034645//cellular macromolecule biosynthetic process
Unigene0000786	5.347	2.567	4.523	5.233	5.327	2.247	4.053	6.847	DAAT	4-amino-4-deoxychorismate lyase [Salvia splendens]	Metabolism	Metabolism of cofactors and vitamins	ko00790//Folate biosynthesis	K18482	GO:0009536//plastid	GO:0008483//transaminase activity;GO:0016829//lyase activity	GO:0008652//cellular amino acid biosynthetic process;GO:0019438//aromatic compound biosynthetic process;GO:1901362//organic cyclic compound biosynthetic process
Unigene0000787	57.203	18.437	53.27	47.68	39.307	20.62	33.917	43.717	SYT4	PREDICTED: synaptotagmin-5-like [Erythranthe guttata]	-	-	-	-	GO:0031090//organelle membrane;GO:0043231//intracellular membrane-bounded organelle	GO:0003677//DNA binding	GO:0006355//regulation of transcription, DNA-templated;GO:0006970//response to osmotic stress;GO:0009630//gravitropism
Unigene0000788	0.577	4.073	2.703	0.343	2.167	2.41	1.237	3.97	LAMA2	laminin subunit beta-2-like [Rhodamnia argentea]	-	-	-	-	-	-	-
Unigene0000789	5.13	0.33	2.4	2.713	3.693	1.03	5.157	5.58	Os11g0706600	thaumatin-like protein [Sesamum indicum]	-	-	-	-	GO:0043231//intracellular membrane-bounded organelle	-	GO:0043207//response to external biotic stimulus
Unigene0000790	2.827	3.023	3.147	2.467	1.613	1.817	3.617	1.047	--	-	-	-	-	-	-	-	-
Unigene0000791	551.02	1.067	301.79	23.277	796.307	42.087	22.66	12.87	--	SMLII [Salvia miltiorrhiza]	-	-	-	-	-	GO:0016772//transferase activity, transferring phosphorus-containing groups;GO:0030246//carbohydrate binding	GO:0044238//primary metabolic process;GO:0044260//cellular macromolecule metabolic process;GO:0051302//regulation of cell division
Unigene0000792	0.173	0.59	0	0	0.94	0.297	0	0	pol	peroxidase 64 [Dorcoceras hygrometricum]	-	-	-	-	-	-	-
Unigene0000793	0	0	2.12	0	0	0	0.653	0	--	-	-	-	-	-	-	-	-
Unigene0000794	7.12	3.813	6.863	5.41	3.337	3.183	6.047	3.54	--	transmembrane protein [Gossypium australe]	-	-	-	-	-	GO:0005488//binding	GO:0006812//cation transport;GO:0046474//glycerophospholipid biosynthetic process
Unigene0000795	4.827	3.033	4.92	4.517	3.6	2.663	4.57	3.713	--	S-adenosyl-L-methionine-dependentmethyltransferases superfamily protein [Striga asiatica]	-	-	-	-	-	GO:0016741//transferase activity, transferring one-carbon groups	GO:0008152//metabolic process
Unigene0000796	4.33	1.503	5.053	6.603	2.373	1.407	5.763	6.43	TBL19	protein trichome birefringence-like 19 [Sesamum indicum]	-	-	-	-	GO:0009536//plastid;GO:0031224//intrinsic component of membrane	-	GO:0000904//cell morphogenesis involved in differentiation;GO:0009664//plant-type cell wall organization
Unigene0000797	0.173	3.913	1.463	0.09	1.16	1.88	0.657	1.86	T18D3.7	-	-	-	-	-	-	-	-
Unigene0000798	29.293	16.527	29.227	20.603	20.303	13.46	22.157	17.307	SKIP14	F-box protein SKIP14-like [Sesamum indicum]	-	-	-	-	-	-	-
Unigene0000799	2.227	0.773	2.59	4.65	1.573	1.333	0	4.817	--	-	-	-	-	-	-	-	-
Unigene0000800	14.247	2.193	6.78	4.14	8.147	2.983	6.57	6.603	CPRF1	plant G-box-binding factor [Salvia splendens]	-	-	-	-	GO:0044424//intracellular part	GO:0003677//DNA binding	GO:0001101//response to acid chemical;GO:0006950//response to stress;GO:0007165//signal transduction;GO:0009725//response to hormone;GO:0010467//gene expression;GO:0034645//cellular macromolecule biosynthetic process
Unigene0000801	4.31	4.73	5.717	5.357	2.563	1.893	4.32	3.633	PCMP-H24	pentatricopeptide repeat protein [Salvia miltiorrhiza]	-	-	-	-	-	-	-
Unigene0000802	0.777	13.82	4.523	0.27	1.92	3.837	1.36	3.593	CYP-1	PREDICTED: peptidyl-prolyl cis-trans isomerase CYP63 isoform X2 [Eucalyptus grandis]	-	-	-	-	-	-	-
Unigene0000803	11.373	0.607	4.147	3.733	7.307	2.097	3.537	4.687	--	-	-	-	-	-	-	-	-
Unigene0000804	0.817	14.543	4.547	0.313	2.723	4.987	1.947	5.29	--	ras guanine nucleotide exchange factor P-like [Rhodamnia argentea]	-	-	-	-	GO:0016020//membrane;GO:0044464//cell part	GO:0003779//actin binding	GO:0022607//cellular component assembly
Unigene0000805	12.75	7.993	11.197	13.283	10.443	6.883	8.18	12.167	At3g09030	SETA binding protein SB1 [Handroanthus impetiginosus]	-	-	-	-	GO:0034705//potassium channel complex;GO:0043231//intracellular membrane-bounded organelle	-	GO:0030001//metal ion transport
Unigene0000806	0	3.03	0.037	0	0	1.537	0	0	--	hypothetical protein Saspl_000102 [Salvia splendens]	-	-	-	-	-	-	-
Unigene0000807	6.3	0.453	3.777	3.637	6.52	1.467	4.517	4.743	ALMT10	PREDICTED: aluminum-activated malate transporter 10-like [Erythranthe guttata]	-	-	-	-	GO:0043231//intracellular membrane-bounded organelle	-	GO:0010087//phloem or xylem histogenesis;GO:0044260//cellular macromolecule metabolic process
Unigene0000808	0.15	0	1.483	0	0.067	0	2.083	0	--	hypothetical protein Saspl_034747 [Salvia splendens]	-	-	-	-	-	-	-
Unigene0000809	0.67	6.117	5.32	0.243	1.587	3.53	1.16	3.253	PLPP1	phosphatidate phosphatase, partial [Thalassiosira pseudonana CCMP1335]	-	-	-	-	-	-	-
Unigene0000810	0	5.443	16.057	0	0	6.057	32.027	0.09	--	-	-	-	-	-	-	-	-
Unigene0000811	9.22	2.033	4.38	7.723	5.257	4.333	4.32	13.153	UGT94E5	beta-D-glucosyl crocetin beta-1,6-glucosyltransferase-like [Sesamum indicum]	-	-	-	-	-	-	-
Unigene0000812	0.54	0.17	0.82	0.543	0.81	0.18	1.97	1.007	--	-	-	-	-	-	-	-	-
Unigene0000813	2.263	1.727	4.103	3.383	2.643	2.36	3.377	3.163	--	DNA damage-repair/toleration protein DRT100 [Sesamum indicum]	-	-	-	-	GO:0005911//cell-cell junction;GO:0030312//external encapsulating structure;GO:0044444//cytoplasmic part	-	GO:0008152//metabolic process;GO:0044699//single-organism process;GO:0050794//regulation of cellular process;GO:0050896//response to stimulus
Unigene0000814	0.07	1.943	0.617	0.037	0.707	1.83	0.243	1.343	Sts	Arylsulfatase [Hondaea fermentalgiana]	-	-	-	-	-	GO:0008484//sulfuric ester hydrolase activity	-
Unigene0000815	0	0	0.587	0.043	0.237	0.087	0.63	0.4	--	-	-	-	-	-	-	-	-
Unigene0000816	0.243	0.077	0.5	0.343	0.69	0.203	0.257	0.53	PCMP-E26	pentatricopeptide repeat protein [Salvia miltiorrhiza]	-	-	-	-	-	-	-
Unigene0000817	1.823	5.153	2.377	1.34	2.09	3.667	2.85	1.703	Os07g0190800	Phosphatidylcholine translocator like [Actinidia chinensis var. chinensis] [Actinidia chinensis]	-	-	-	-	-	-	-
Unigene0000818	10.003	0.293	0.277	1.883	2.36	0.763	0.617	1.377	EPS1	uncharacterized acetyltransferase At3g50280-like [Sesamum indicum]	-	-	-	-	-	GO:0016746//transferase activity, transferring acyl groups	-
Unigene0000819	1.46	0.99	0.947	2.19	1.29	0.493	0.87	1.46	R1B-16	Apoptotic ATPase [Handroanthus impetiginosus]	-	-	-	-	-	-	-
Unigene0000820	1.387	1.967	6.18	2.453	1.337	1.767	9.56	2.043	--	growth-regulating factor 6 [Sesamum indicum]	-	-	-	-	-	-	-
Unigene0000821	0.437	8.2	3.797	0.293	1.747	1.947	0.727	1.893	maea	macrophage erythroblast attacher protein [Capsaspora owczarzaki ATCC 30864]	-	-	-	-	GO:0044424//intracellular part	-	-
Unigene0000822	2.26	0.71	1.9	3.643	2.933	0.84	2.14	2.373	--	calpain-type cysteine protease family [Striga asiatica]	-	-	-	-	GO:0043231//intracellular membrane-bounded organelle	-	GO:0006412//translation
Unigene0000824	1.027	14.2	5.05	0.823	2.15	4.26	1.75	3.55	ASK18	E3 ubiquitin ligase complex SCF subunit sconC-like [Quercus suber]	Genetic Information Processing;Genetic Information Processing	Folding, sorting and degradation;Folding, sorting and degradation	ko04141//Protein processing in endoplasmic reticulum;ko04120//Ubiquitin mediated proteolysis	K03094;K03094	-	-	GO:0044238//primary metabolic process;GO:0044260//cellular macromolecule metabolic process
Unigene0000826	0.537	6.71	4.023	0.32	1.903	2.733	1.363	4.443	PSME4	proteasome activator complex subunit 4-like [Rhodamnia argentea]	Genetic Information Processing	Folding, sorting and degradation	ko03050//Proteasome	K06699	-	-	-
Unigene0000827	14.443	4.76	8.513	9.783	15.677	11.247	13.087	9.457	At1g50180	Apoptotic ATPase [Handroanthus impetiginosus]	-	-	-	-	-	-	-
Unigene0000828	2.323	0	2.33	3.27	2.467	0	3.753	2.597	RPP8L3	Apoptotic ATPase [Handroanthus impetiginosus]	-	-	-	-	-	-	-
Unigene0000829	5.623	0.583	2.47	1.317	3.647	0.527	1.433	1.043	At1g50180	Apoptotic ATPase [Handroanthus impetiginosus]	-	-	-	-	-	-	-
Unigene0000831	2.913	1.95	2.643	4.183	1.453	1.233	3.58	2.277	At1g50180	disease resistance protein RPM1 [Salvia splendens]	-	-	-	-	-	-	-
Unigene0000832	0.84	0.1	0.36	1.197	0.213	0.077	0.25	0.833	RPP8L4	Apoptotic ATPase [Handroanthus impetiginosus]	-	-	-	-	-	-	-
Unigene0000833	9.83	2.727	4.023	6.24	4.893	2.24	4.917	5.06	RPP13L3	Apoptotic ATPase [Handroanthus impetiginosus]	-	-	-	-	-	-	-
Unigene0000834	1.657	0.633	1.22	0.677	1.027	0.637	2.107	0.677	At1g50180	Apoptotic ATPase [Handroanthus impetiginosus]	-	-	-	-	-	-	-
Unigene0000835	4.427	1.433	3.11	1.083	0.49	0.26	1.687	0.997	--	Apoptotic ATPase [Handroanthus impetiginosus]	-	-	-	-	-	-	-
Unigene0000836	1.23	1.353	0.807	1.57	2.263	1.267	0.86	1.247	RPP13L3	Apoptotic ATPase [Handroanthus impetiginosus]	-	-	-	-	-	-	-
Unigene0000837	4.803	8.37	1.35	1.237	2.47	11.363	0.95	0.733	RPP8	Apoptotic ATPase [Handroanthus impetiginosus]	-	-	-	-	-	-	-
Unigene0000838	1.12	0	0.11	0	1.58	0	0	0	--	Disease resistance protein [Macleaya cordata]	-	-	-	-	-	-	-
Unigene0000839	2.767	2.95	1.96	3.163	2.063	2.177	1.84	2.253	--	PREDICTED: disease resistance protein RPM1-like [Erythranthe guttata]	-	-	-	-	-	-	-
Unigene0000840	0.51	5.37	3.45	0.083	0.73	1.973	0.587	1.587	ARHGEF7	cytoplasmic protein NCK2-like [Rhodamnia argentea]	-	-	-	-	-	-	GO:0035023//regulation of Rho protein signal transduction
Unigene0000841	4.463	8.687	38.73	1.863	14.06	13.803	1.32	44.787	lec-1	-	-	-	-	-	-	-	-
Unigene0000842	0.43	6.543	5.023	0.337	1.363	3.767	1.12	3.927	--	rho GTPase-activating protein 17-like [Quercus suber]	-	-	-	-	-	-	-
Unigene0000843	0.013	7.783	6.023	0.687	0	6.703	8.94	0.917	ECT1	ATP-dependent RNA helicase DDX5/DBP2 [Salvia splendens]	-	-	-	-	GO:0043231//intracellular membrane-bounded organelle;GO:0044444//cytoplasmic part	GO:0005488//binding	-
Unigene0000844	1.47	1.5	1.397	15.447	0.917	2.64	0	15.3	At3g11320	nucleotide-sugar transporter family protein [Striga asiatica]	-	-	-	-	GO:0031224//intrinsic component of membrane	GO:0008509//anion transmembrane transporter activity	GO:0006820//anion transport;GO:0015851//nucleobase transport;GO:0044763//single-organism cellular process
Unigene0000845	0.847	13.763	6.317	0.347	2.613	4.713	1.583	5.583	Huwe1	E3 ubiquitin-protein ligase HUWE1-like [Rhodamnia argentea]	-	-	-	-	-	-	-
Unigene0000846	0	3.257	0.03	0	0	0	0	0	LAC1	laccase-2-like [Quercus suber]	-	-	-	-	-	-	GO:0044710//single-organism metabolic process
Unigene0000847	2.96	3.877	0.937	2.107	3.117	0.38	0.43	1.253	At4g27290	G-type lectin S-receptor-like serine/threonine-protein kinase At4g27290 isoform X2 [Olea europaea var. sylvestris] [Olea europaea]	-	-	-	-	-	GO:0016301//kinase activity	GO:0009987//cellular process
Unigene0000848	0	0	11.093	0	0	0	0	0	--	-	-	-	-	-	-	-	-
Unigene0000849	1.557	0.627	3.04	0.17	0.51	1.017	2.937	0.37	At4g08300	WAT1-related protein At4g08300-like [Sesamum indicum]	-	-	-	-	GO:0031224//intrinsic component of membrane	GO:0005215//transporter activity	GO:0044763//single-organism cellular process
Unigene0000850	9.71	7.03	9.147	10.72	7.75	5.443	9.22	8.067	FBXL17	DNA repair protein RAD7 [Salvia splendens]	-	-	-	-	-	-	-
Unigene0000851	0.03	0	0.017	4.977	0	0	0	3.587	ACT1	actin-1 [Sesamum indicum]	-	-	-	-	GO:0005911//cell-cell junction;GO:0009526//plastid envelope;GO:0009532//plastid stroma;GO:0016020//membrane;GO:0030312//external encapsulating structure;GO:0043232//intracellular non-membrane-bounded organelle	GO:0005198//structural molecule activity;GO:0017111//nucleoside-triphosphatase activity;GO:0032550//purine ribonucleoside binding;GO:0046914//transition metal ion binding	GO:0000904//cell morphogenesis involved in differentiation;GO:0006006//glucose metabolic process;GO:0006970//response to osmotic stress;GO:0007010//cytoskeleton organization;GO:0008104//protein localization;GO:0009314//response to radiation;GO:0009725//response to hormone;GO:0010015//root morphogenesis;GO:0010038//response to metal ion;GO:0016192//vesicle-mediated transport;GO:0048588//developmen…
Unigene0000852	0.2	0	2.97	0.547	0.397	0	6.177	0.15	--	-	-	-	-	-	-	-	-
Unigene0000853	0.343	0.573	1.08	0.03	0.14	0.973	2.157	0.023	--	transposase [Ipomoea nil]	-	-	-	-	-	-	-
Unigene0000854	92.313	152.39	93.117	72.783	104.3	69.827	115.17	70.123	LRR1	LRR receptor kinase BAK1 [Sesamum indicum]	-	-	-	-	-	GO:0016628//oxidoreductase activity, acting on the CH-CH group of donors, NAD or NADP as acceptor	GO:0006090//pyruvate metabolic process;GO:0006796//phosphate-containing compound metabolic process;GO:0006970//response to osmotic stress;GO:0006996//organelle organization;GO:0009814//defense response, incompatible interaction;GO:0010038//response to metal ion;GO:0033554//cellular response to stress;GO:0042044//fluid transport;GO:0042743//hydrogen peroxide metabolic process;GO:0050794//regulatio…
Unigene0000855	11.373	4.667	13.92	9.687	7.24	4.84	10.777	8.253	RZ1C	glycine-rich RNA-binding protein RZ1C isoform X1 [Sesamum indicum]	Genetic Information Processing	Transcription	ko03040//Spliceosome	K12885	-	GO:0046872//metal ion binding	-
Unigene0000856	1.3	0.063	1.183	0	0.773	0.023	3.447	0.09	R1A-10	NBS-LRR class resistance protein Fy12-Ry1, partial [Sesamum indicum]	-	-	-	-	-	-	-
Unigene0000857	6.883	4.907	7.597	6.383	4.523	3.073	6.603	4.473	Ccdc12	BRO1 domain containing protein [Trema orientale]	-	-	-	-	GO:0043231//intracellular membrane-bounded organelle	-	-
Unigene0000858	3.93	2.16	4.81	4.113	5.67	2.29	7.243	4.497	XI-F	myosin V [Salvia splendens]	-	-	-	-	GO:0016459//myosin complex	GO:0008092//cytoskeletal protein binding;GO:0017111//nucleoside-triphosphatase activity;GO:0032550//purine ribonucleoside binding	GO:0006928//movement of cell or subcellular component;GO:0009653//anatomical structure morphogenesis;GO:0009790//embryo development;GO:0009791//post-embryonic development;GO:0010087//phloem or xylem histogenesis;GO:0016043//cellular component organization;GO:0044260//cellular macromolecule metabolic process;GO:0044702//single organism reproductive process;GO:0048367//shoot system development;GO:0…
Unigene0000859	2.757	1.547	4.5	3.587	2.73	2.76	3.883	3.107	PPRD2	PREDICTED: polyprenol reductase 2 [Erythranthe guttata]	Metabolism	Glycan biosynthesis and metabolism	ko00510//N-Glycan biosynthesis	K12345	GO:0043231//intracellular membrane-bounded organelle;GO:0044425//membrane part	GO:0016491//oxidoreductase activity	GO:0044238//primary metabolic process;GO:0044710//single-organism metabolic process
Unigene0000860	28.697	3.223	5.157	7.72	13.22	2.153	11.74	10.997	HTR2	PREDICTED: histone H3.2 [Musa acuminata subsp. malaccensis] [Musa acuminata]	-	-	-	-	GO:0000785//chromatin;GO:0030529//intracellular ribonucleoprotein complex;GO:0043231//intracellular membrane-bounded organelle	GO:0003676//nucleic acid binding;GO:0046983//protein dimerization activity	GO:0010467//gene expression
Unigene0000861	1.817	0.403	1.87	0.817	0.81	0.497	0.057	0.957	--	-	-	-	-	-	-	-	-
Unigene0000862	1.69	0.403	0.843	0.543	0.8	0.79	1.147	0.687	--	general transcription factor 3C polypeptide 3 (transcription factor C subunit 4) [Salvia splendens]	-	-	-	-	-	-	-
Unigene0000863	4.51	1.243	3.297	5.657	4.303	1.96	1.483	4.36	--	-	-	-	-	-	-	-	-
Unigene0000864	0.72	0.033	0.35	0.683	0.467	0.113	0.253	0.487	--	-	-	-	-	-	-	-	-
Unigene0000865	1.993	0	0	0	0	0	0	0	--	-	-	-	-	-	-	-	-
Unigene0000866	20.14	17.287	23.523	26.833	15.36	16.437	19.97	16.22	NFYA3	nuclear transcription factor Y subunit A-3 isoform X4 [Sesamum indicum]	-	-	-	-	-	-	-
Unigene0000867	1.163	0.687	1.4	0	0.82	0.747	1.257	0.177	--	-	-	-	-	-	-	-	-
Unigene0000868	13.64	4.917	0	10.727	7.077	6.003	0.053	7.033	--	-	-	-	-	-	-	-	-
Unigene0000869	0.047	0	0.103	0.533	0.357	0.12	0	0.377	--	-	-	-	-	-	-	-	-
Unigene0000870	37.667	17.597	36.183	45.57	31.163	27.047	34.1	40.223	RLT2	chromatin assembly factor 1 subunit [Catalpa bungei]	-	-	-	-	-	-	-
Unigene0000871	1.4	3.763	9.803	1.053	1.517	5.253	9.637	1.377	--	polyphenol oxidase [Striga asiatica]	-	-	-	-	-	-	-
Unigene0000872	8.89	7.87	7.013	7.427	10.183	2.81	5.457	6.343	CXE16	Arylacetamide deacetylase [Handroanthus impetiginosus]	-	-	-	-	-	-	GO:0006812//cation transport
Unigene0000873	10.24	3.937	13.177	10.467	6.7	5.287	10.863	7.047	--	snRNA-activating protein complex subunit 1 [Salvia splendens]	-	-	-	-	GO:0043231//intracellular membrane-bounded organelle	-	-
Unigene0000874	9.32	0.173	6.43	15.47	8.263	0.413	7.123	12.41	--	DUF674 family protein [Trifolium pratense]	-	-	-	-	-	-	-
Unigene0000875	1.947	42.773	62.213	2.84	10.913	10.167	5.717	39.3	--	-	-	-	-	-	-	-	-
Unigene0000876	22.117	6.107	10.813	11.55	9.03	6.72	5.667	8.783	--	hypothetical protein Saspl_036071 [Salvia splendens]	-	-	-	-	-	-	-
Unigene0000877	0.003	4.143	39.117	0.007	0	10.317	74.73	0.117	Pol	non-LTR retroelement reverse transcriptase-like protein [Striga asiatica]	-	-	-	-	-	-	-
Unigene0000878	3.19	0.113	0.143	0.13	1.37	0.24	0.233	0.107	--	-	-	-	-	-	-	-	-
Unigene0000879	0.66	26.863	4.073	0.223	2.12	6.6	2.787	3.523	myo-3	myosin heavy chain, muscle-like [Rhodamnia argentea]	-	-	-	-	-	-	-
Unigene0000880	1.57	0.64	0.907	1.523	1.443	0.81	1.063	1.417	At5g66980	B3 domain-containing protein Os08g0324300-like [Sesamum indicum]	-	-	-	-	-	-	-
Unigene0000881	0	0.097	0.583	0.217	0	0.1	1.053	0.03	--	-	-	-	-	-	-	-	-
Unigene0000882	0.043	4.347	0.503	0.04	1.34	1.757	0.55	0.773	clec-180	-	-	-	-	-	-	-	-
Unigene0000883	4.873	1.003	8.273	5.45	0.837	1.867	6.893	3.83	--	MYB-related transcription factor [Salvia miltiorrhiza]	-	-	-	-	-	-	-
Unigene0000884	4.717	1.053	0	3.593	3.407	2.047	0	3.137	GALT6	hydroxyproline O-galactosyltransferase GALT6 [Sesamum indicum]	-	-	-	-	GO:0009536//plastid;GO:0031224//intrinsic component of membrane	GO:0005488//binding;GO:0035250//UDP-galactosyltransferase activity	GO:0006464//cellular protein modification process
Unigene0000885	0.537	2.933	4.267	2.457	0.587	3.52	5.18	1.937	--	-	-	-	-	-	-	-	-
Unigene0000886	0	0.05	0.653	0	0	0.04	1.207	0	--	PREDICTED: disease resistance protein RPM1-like [Erythranthe guttata]	-	-	-	-	-	-	-
Unigene0000887	0	4.78	0	0	0.077	4.44	0	0	--	-	-	-	-	-	-	-	-
Unigene0000888	3.703	0.087	0.973	3.387	1.54	0.357	1.557	2.37	BHLH153	basic helix-loop-helix (bHLH) DNA-bindingsuperfamily protein [Striga asiatica]	-	-	-	-	-	GO:0001071//nucleic acid binding transcription factor activity	GO:0009725//response to hormone
Unigene0000889	206.79	59.74	106.023	107.393	252.227	54.983	127.763	124.693	MET	PREDICTED: 5-methyltetrahydropteroyltriglutamate--homocysteine methyltransferase-like [Ipomoea nil]	Metabolism;Metabolism;Metabolism;Metabolism;Metabolism	Global and overview maps;Global and overview maps;Global and overview maps;Amino acid metabolism;Metabolism of other amino acids	ko01100//Metabolic pathways;ko01110//Biosynthesis of secondary metabolites;ko01230//Biosynthesis of amino acids;ko00270//Cysteine and methionine metabolism;ko00450//Selenocompound metabolism	K00549;K00549;K00549;K00549;K00549	GO:0005576//extracellular region;GO:0005911//cell-cell junction;GO:0009526//plastid envelope;GO:0009532//plastid stroma;GO:0031090//organelle membrane;GO:0042579//microbody	GO:0008172//S-methyltransferase activity;GO:0016620//oxidoreductase activity, acting on the aldehyde or oxo group of donors, NAD or NADP as acceptor;GO:0016627//oxidoreductase activity, acting on the CH-CH group of donors;GO:0046914//transition metal ion binding	GO:0000097//sulfur amino acid biosynthetic process;GO:0006970//response to osmotic stress;GO:0010038//response to metal ion;GO:0010208//pollen wall assembly
Unigene0000890	2.637	1.93	7.12	0.917	7.43	0.79	3.153	0.667	EIX2	EIX receptor 1/2 [Salvia splendens]	-	-	-	-	-	-	-
Unigene0000891	27.607	9.26	25.937	26.887	15.68	11.017	21.697	15.163	At5g62290	chloride channel, nucleotide-sensitive, 1A [Salvia splendens]	Genetic Information Processing	Translation	ko03013//RNA transport	K05019	GO:0043231//intracellular membrane-bounded organelle;GO:0043234//protein complex;GO:0044444//cytoplasmic part	GO:0015075//ion transmembrane transporter activity	GO:0000338//protein deneddylation;GO:0000377//RNA splicing, via transesterification reactions with bulged adenosine as nucleophile;GO:0006605//protein targeting;GO:0009639//response to red or far red light;GO:0019725//cellular homeostasis
Unigene0000892	33.43	10.79	42.98	37.363	20.833	22.97	29.863	24.853	--	taxilin [Striga asiatica]	-	-	-	-	GO:0044424//intracellular part	GO:0000149//SNARE binding;GO:0008135//translation factor activity, RNA binding;GO:0017111//nucleoside-triphosphatase activity;GO:0032550//purine ribonucleoside binding	GO:0034645//cellular macromolecule biosynthetic process
Unigene0000893	2.683	2.947	4.943	2.753	2.257	2.007	3.117	1.793	RBK1	Serine/threonine protein kinase [Handroanthus impetiginosus]	-	-	-	-	GO:0043231//intracellular membrane-bounded organelle;GO:0044444//cytoplasmic part	GO:0004674//protein serine/threonine kinase activity;GO:0004871//signal transducer activity;GO:0019899//enzyme binding;GO:0036094//small molecule binding;GO:0097159//organic cyclic compound binding;GO:1901363//heterocyclic compound binding	GO:0006468//protein phosphorylation;GO:0009610//response to symbiotic fungus;GO:0009723//response to ethylene;GO:0019932//second-messenger-mediated signaling;GO:0045087//innate immune response
Unigene0000894	0.88	11.143	6.06	0.38	2.383	5.047	1.877	5.137	Atp2c1	calcium-transporting ATPase type 2C member 1-like [Rhodamnia argentea]	-	-	-	-	GO:0005783//endoplasmic reticulum;GO:0044425//membrane part;GO:0044446//intracellular organelle part;GO:0098588//bounding membrane of organelle	GO:0019829//cation-transporting ATPase activity	GO:0030001//metal ion transport;GO:0044763//single-organism cellular process
Unigene0000895	0.77	0.36	1.033	0.757	6.653	0.403	0.64	0.63	--	acyl-coenzyme A thioesterase 1/2/4 [Salvia splendens]	Metabolism;Metabolism;Metabolism;Metabolism	Global and overview maps;Global and overview maps;Lipid metabolism;Lipid metabolism	ko01100//Metabolic pathways;ko01110//Biosynthesis of secondary metabolites;ko01040//Biosynthesis of unsaturated fatty acids;ko00062//Fatty acid elongation	K01068;K01068;K01068;K01068	-	GO:0047617//acyl-CoA hydrolase activity	-
Unigene0000896	91.053	25.79	60.443	61.287	53.707	27.577	51.95	60.367	At3g47200	PREDICTED: UPF0481 protein At3g47200-like [Daucus carota subsp. sativus] [Daucus carota]	-	-	-	-	-	-	-
Unigene0000897	0	2.3	1.547	0.323	0	1.07	1.32	0.2	--	RecName: Full=Pelargonidin 3-O-(6-caffeoylglucoside) 5-O-(6-O-malonylglucoside) 4'''-malonyltransferase; AltName: Full=Anthocyanin 5-O-glucoside-4'''-O-malonyltransferase 2; Short=Ss5MaT2 [Salvia splendens]	-	-	-	-	-	GO:0016746//transferase activity, transferring acyl groups	GO:0044699//single-organism process
Unigene0000898	1.31	0.413	3.207	0.87	0.813	0.26	2.797	0.83	--	COX assembly mitochondrial protein 2 [Salvia splendens]	-	-	-	-	GO:0009536//plastid	-	-
Unigene0000899	8.313	4.96	7.11	10.227	9.29	6.03	4.84	11.01	IP5P12	PREDICTED: type I inositol 1,4,5-trisphosphate 5-phosphatase 12-like [Erythranthe guttata]	-	-	-	-	GO:0043231//intracellular membrane-bounded organelle	GO:0046030//inositol trisphosphate phosphatase activity	GO:0000904//cell morphogenesis involved in differentiation;GO:0001101//response to acid chemical;GO:0006796//phosphate-containing compound metabolic process;GO:0006950//response to stress;GO:0009416//response to light stimulus;GO:0009664//plant-type cell wall organization;GO:0009756//carbohydrate mediated signaling;GO:0009888//tissue development;GO:0019637//organophosphate metabolic process;GO:00…
Unigene0000900	2.807	0.793	1.99	1.917	1.33	0.613	2.453	0.857	--	Mitochondrial transcription termination factor, mTERF [Handroanthus impetiginosus]	-	-	-	-	-	-	-
Unigene0000901	31.43	20.757	62.413	23.487	24.15	19.027	20.913	18.927	TIF3B1	translation initiation factor 3 subunit B [Salvia splendens]	Genetic Information Processing	Translation	ko03013//RNA transport	K03253	-	-	-
Unigene0000902	10.11	6.75	10.367	10.67	12.05	5.737	12.873	9.063	UBP10	ubiquitin carboxyl-terminal hydrolase 4/11/15 [Salvia splendens]	-	-	-	-	-	GO:0008233//peptidase activity;GO:0046872//metal ion binding	GO:0006508//proteolysis;GO:0044267//cellular protein metabolic process
Unigene0000903	12.457	0.29	0.523	0	13.717	0.297	0.61	0.013	--	protein kinase family protein [Striga asiatica]	-	-	-	-	-	-	-
Unigene0000904	7.383	3.353	6.977	8.243	5.977	3.957	6.317	6.377	chid1	chitinase domain-containing protein 1 [Salvia splendens]	-	-	-	-	-	-	-
Unigene0000905	1.367	0.427	0.47	0.303	1.063	0.223	0.557	0.4	--	-	-	-	-	-	-	-	-
Unigene0000906	3.91	0.497	2.82	6.023	3.883	4.177	3.37	6.98	2ODD19	Iron/ascorbate family oxidoreductase [Handroanthus impetiginosus]	-	-	-	-	-	GO:0016706//oxidoreductase activity, acting on paired donors, with incorporation or reduction of molecular oxygen, 2-oxoglutarate as one donor, and incorporation of one atom each of oxygen into both donors	-
Unigene0000907	27.73	0.647	10.88	4.49	26.677	6.113	14.013	6.9	ANS	protein DMR6-LIKE OXYGENASE 1 [Sesamum indicum]	-	-	-	-	-	GO:0016706//oxidoreductase activity, acting on paired donors, with incorporation or reduction of molecular oxygen, 2-oxoglutarate as one donor, and incorporation of one atom each of oxygen into both donors	-
Unigene0000908	0.767	1.043	4.027	0	1.073	1.933	3.977	0	--	F-box/LRR-repeat protein 25-like isoform X2 [Olea europaea var. sylvestris] [Olea europaea]	-	-	-	-	-	-	-
Unigene0000909	0.333	0.187	0.367	0.833	0.293	0.167	0.453	0.477	--	hypothetical protein Saspl_003323 [Salvia splendens]	-	-	-	-	-	-	-
Unigene0000910	1.83	0.673	0.33	1.64	1.52	0.553	0.74	1.783	--	-	-	-	-	-	-	-	-
Unigene0000911	1.817	0.487	0.783	1.99	1.1	0.503	1.68	1.43	At3g03360	F-box/LRR-repeat protein 25-like isoform X2 [Olea europaea var. sylvestris] [Olea europaea]	-	-	-	-	-	-	-
Unigene0000913	6.817	6.313	4.447	5.197	3.833	4.037	4.933	4.93	--	F-box/LRR-repeat protein 25-like isoform X2 [Olea europaea var. sylvestris] [Olea europaea]	-	-	-	-	-	-	-
Unigene0000914	0.483	0.383	1.103	0.813	0.447	0.223	1.267	1.107	--	F-box/LRR-repeat protein 25-like isoform X2 [Olea europaea var. sylvestris] [Olea europaea]	-	-	-	-	-	-	-
Unigene0000915	1.357	0.603	0.21	0.243	0.717	0.19	0.84	0.32	--	F-box/LRR-repeat protein At3g26922 [Dendrobium catenatum]	-	-	-	-	-	-	-
Unigene0000916	1.37	0.313	0.977	2.74	0.927	0.227	1.043	2.147	At1g16930	F-box/LRR-repeat protein 25-like isoform X2 [Olea europaea var. sylvestris] [Olea europaea]	-	-	-	-	-	-	-
Unigene0000917	2.74	2.993	2.32	2.907	2.167	1.493	2.353	1.67	--	F-box/LRR-repeat protein At5g02910-like [Ziziphus jujuba]	-	-	-	-	-	-	-
Unigene0000918	1.6	0	0	0.193	1.613	0	0	0.173	--	transposable element gene [Prunus dulcis]	-	-	-	-	-	-	-
Unigene0000919	0	0.063	0.417	0.107	0	0.2	0.117	0.06	--	-	-	-	-	-	-	-	-
Unigene0000920	6.177	4.32	5.183	5.82	4.523	5.08	4.463	4.22	PCMP-E85	pentatricopeptide repeat protein [Salvia miltiorrhiza]	-	-	-	-	-	-	-
Unigene0000921	0	0	6.26	12.39	0.047	0.023	0	13.387	--	-	-	-	-	-	-	-	-
Unigene0000922	95.483	71.21	80.937	80.34	81.013	57.24	93.267	73.903	CD4B	ATP-dependent Clp protease ATP-binding subunit ClpC [Salvia splendens]	-	-	-	-	GO:0009528//plastid inner membrane;GO:0009532//plastid stroma;GO:0030312//external encapsulating structure;GO:0043234//protein complex;GO:0044434//chloroplast part	GO:0032550//purine ribonucleoside binding;GO:0042623//ATPase activity, coupled;GO:0046983//protein dimerization activity	GO:0006351//transcription, DNA-templated;GO:0006605//protein targeting;GO:0009658//chloroplast organization;GO:0009668//plastid membrane organization;GO:0009725//response to hormone;GO:0042743//hydrogen peroxide metabolic process;GO:0044257//cellular protein catabolic process;GO:0044743//intracellular protein transmembrane import;GO:0051259//protein oligomerization;GO:0090056//regulation of chlor…
Unigene0000923	1.467	0.33	0.767	1.31	0.65	0.483	0.683	0.573	--	-	-	-	-	-	-	-	-
Unigene0000924	0.28	4.763	2.62	0.073	0.883	2.123	0.683	2.513	dex-1	Wall-associated receptor kinase 2, partial [Mucuna pruriens]	-	-	-	-	GO:0016020//membrane	GO:0004672//protein kinase activity;GO:0005488//binding	GO:0003006//developmental process involved in reproduction;GO:0006796//phosphate-containing compound metabolic process;GO:0016043//cellular component organization;GO:0042221//response to chemical;GO:0044238//primary metabolic process;GO:0044710//single-organism metabolic process;GO:0044763//single-organism cellular process;GO:0044767//single-organism developmental process;GO:0048856//anatomical s…
Unigene0000925	0.89	0.907	1.647	1.207	0.883	0.463	0.943	0.55	--	-	-	-	-	-	-	-	-
Unigene0000926	1.113	0.047	0.877	0.333	2.167	0.08	0.607	0.267	At5g39000	Serine/threonine protein kinase [Handroanthus impetiginosus]	-	-	-	-	-	GO:0016772//transferase activity, transferring phosphorus-containing groups	GO:0009987//cellular process
Unigene0000927	0.18	0.383	0.17	1.27	0.237	0.487	0.173	0.713	--	F-box and associated interaction domains-containing protein [Striga asiatica]	-	-	-	-	-	-	-
Unigene0000928	1.007	0.31	1.313	1.117	0.57	0.39	1.857	0.82	--	-	-	-	-	-	-	-	-
Unigene0000929	1.663	0.677	0.283	2.68	1.387	1.19	0.783	1.8	--	-	-	-	-	-	-	-	-
Unigene0000930	1.963	0.857	1.99	1.093	1.217	1.35	1.243	0.693	--	protein embryo defective 1674 [Nicotiana attenuata]	-	-	-	-	-	-	GO:0006259//DNA metabolic process;GO:0006342//chromatin silencing;GO:0016569//covalent chromatin modification;GO:0035194//posttranscriptional gene silencing by RNA;GO:0048449//floral organ formation;GO:0070918//production of small RNA involved in gene silencing by RNA;GO:1902589//single-organism organelle organization
Unigene0000931	1.137	0.997	18.647	0.187	0.88	0.603	30.083	0.14	--	de-etiolated-1 [Salvia splendens]	-	-	-	-	-	-	-
Unigene0000932	3.887	0.297	3.233	0.147	1.543	0.57	4.713	0.067	--	-	-	-	-	-	-	-	-
Unigene0000933	51.973	32.2	59.84	51.733	35.273	33.007	27.247	41.423	PEX19-2	peroxin-19 [Salvia splendens]	Cellular Processes	Transport and catabolism	ko04146//Peroxisome	K13337	GO:0044439//peroxisomal part	GO:0005515//protein binding	GO:0006996//organelle organization;GO:0008104//protein localization
Unigene0000934	24.077	12.383	19.97	18.803	18.267	9.347	16.3	13.733	CPK4	calcium-dependent protein kinase [Salvia splendens]	Organismal Systems	Environmental adaptation	ko04626//Plant-pathogen interaction	K13412	GO:0043231//intracellular membrane-bounded organelle	GO:0004674//protein serine/threonine kinase activity;GO:0032550//purine ribonucleoside binding;GO:0046872//metal ion binding	GO:0000904//cell morphogenesis involved in differentiation;GO:0006464//cellular protein modification process;GO:0006796//phosphate-containing compound metabolic process;GO:0009664//plant-type cell wall organization
Unigene0000935	25.137	13.54	29.17	25.627	18.357	13.787	30.613	18.827	--	protein LTV1 [Salvia splendens]	-	-	-	-	-	-	-
Unigene0000936	19.793	12.797	15.61	18.553	20.49	22.627	12.837	17.067	MYB88	MYB-related transcription factor [Salvia miltiorrhiza]	-	-	-	-	GO:0043231//intracellular membrane-bounded organelle	GO:0003677//DNA binding	GO:0030154//cell differentiation
Unigene0000937	1.19	0.057	1.727	0.017	2.03	0.12	2.153	0.09	CKI1	PREDICTED: histidine kinase CKI1-like [Erythranthe guttata]	-	-	-	-	-	-	-
Unigene0000938	15.83	2.53	14.603	12.683	16.337	7.91	14.347	15.583	SD22	G-type lectin S-receptor-like serine/threonine-protein kinase SD2-2 [Sesamum indicum]	-	-	-	-	-	-	-
Unigene0000939	1.163	0.55	1.607	1.69	0.927	0.487	0.93	1.16	--	MATE38 [Rehmannia glutinosa]	-	-	-	-	-	-	-
Unigene0000940	0.137	0.03	0.983	0.09	0.467	1.073	1.04	0.33	--	-	-	-	-	-	-	-	-
Unigene0000941	7.447	3.097	4.647	6.727	8.097	2.74	3.453	5.42	--	protein ENHANCED DISEASE RESISTANCE 4 [Sesamum indicum]	-	-	-	-	-	-	-
Unigene0000942	16.55	7.573	17.023	10.057	8.2	10.517	17.69	8.18	--	RNA-binding (RRM/RBD/RNP motifs) family protein [Striga asiatica]	-	-	-	-	-	-	-
Unigene0000943	0	7.13	0.307	0	0	10.457	0.15	0	RPP8L2	NBS-LRR type resistance protein [Striga asiatica]	-	-	-	-	-	-	-
Unigene0000944	1.967	0.913	0.25	0.05	0.667	0.18	0	0	--	polyphenol oxidase I, chloroplastic [Sesamum indicum]	Metabolism;Metabolism;Metabolism;Metabolism	Global and overview maps;Global and overview maps;Amino acid metabolism;Biosynthesis of other secondary metabolites	ko01100//Metabolic pathways;ko01110//Biosynthesis of secondary metabolites;ko00350//Tyrosine metabolism;ko00950//Isoquinoline alkaloid biosynthesis	K00422;K00422;K00422;K00422	GO:0009536//plastid	-	GO:0009807//lignan biosynthetic process
Unigene0000945	0	28.563	23.52	1.057	0	2.623	4.673	10.417	--	-	-	-	-	-	-	-	-
Unigene0000946	0.923	0.363	0.857	0.65	1.053	0.283	0.223	0.857	ARP2	60S ribosomal protein L3 isoform C [Glycine soja]	Genetic Information Processing	Translation	ko03010//Ribosome	K02925	GO:0030529//intracellular ribonucleoprotein complex	-	GO:0010467//gene expression
Unigene0000947	0.21	4.73	1.167	0.093	1	1.55	0.67	1.743	KIF3B	Kinesin-like protein [Klebsormidium nitens]	-	-	-	-	GO:0005929//cilium;GO:0015630//microtubule cytoskeleton;GO:0032838//cell projection cytoplasm;GO:0043234//protein complex;GO:0044430//cytoskeletal part	GO:0005488//binding;GO:0016787//hydrolase activity	GO:0042073//intraciliary transport;GO:0042384//cilium assembly
Unigene0000948	0	0	1.793	0.3	0	0.03	2.487	0.073	--	-	-	-	-	-	-	-	-
Unigene0000949	1.4	0.02	1.383	1.113	1.207	0.29	0.827	1.507	GRF1	growth-regulating factor 6 [Sesamum indicum]	-	-	-	-	-	-	-
Unigene0000951	0	0.54	1.427	0.06	0	0.13	0.48	0.357	--	-	-	-	-	-	-	-	-
Unigene0000952	38.637	20.49	31.65	33.767	33.613	21.513	28.913	27.227	--	PREDICTED: peroxisomal and mitochondrial division factor 2 [Erythranthe guttata]	-	-	-	-	-	-	-
Unigene0000953	24.887	17.04	21.17	20.68	20.05	12.287	23.623	18.41	Stxbp5	Tomosyn [Handroanthus impetiginosus]	-	-	-	-	GO:0016020//membrane;GO:0044464//cell part	-	-
Unigene0000954	0	0.01	7.4	0.01	0	0	12.877	0	R1B-16	disease resistance protein [Striga asiatica]	-	-	-	-	-	-	-
Unigene0000955	1.977	1.847	3.243	2.963	2.23	1.427	1.797	2.883	--	-	-	-	-	-	-	-	-
Unigene0000956	3.71	5.037	5.88	4	2.823	5.967	7.323	3.45	ALA2	phospholipid-transporting ATPase 2 isoform X1 [Gossypium australe]	-	-	-	-	GO:0005768//endosome;GO:0005911//cell-cell junction;GO:0031984//organelle subcompartment;GO:0044425//membrane part;GO:0098588//bounding membrane of organelle	GO:0042625//ATPase coupled ion transmembrane transporter activity;GO:0046872//metal ion binding	GO:0006812//cation transport;GO:0015914//phospholipid transport
Unigene0000957	0.927	0	0	0	0.667	0.023	0	0	--	PREDICTED: probable leucine-rich repeat receptor-like protein kinase At1g35710, partial [Erythranthe guttata]	-	-	-	-	-	-	-
Unigene0000959	1.463	0.267	0.197	0.57	0.86	0.05	0.243	0.543	--	-	-	-	-	-	-	-	-
Unigene0000960	0.193	4.047	1.1	0.233	0.243	1.023	0.423	0.653	cdk-5	protein serine/threonine kinase [Capsaspora owczarzaki ATCC 30864]	-	-	-	-	GO:0016020//membrane;GO:0043231//intracellular membrane-bounded organelle;GO:0055028//cortical microtubule	GO:0004674//protein serine/threonine kinase activity;GO:0032550//purine ribonucleoside binding	GO:0000079//regulation of cyclin-dependent protein serine/threonine kinase activity;GO:0003006//developmental process involved in reproduction;GO:0007126//meiotic nuclear division;GO:0009267//cellular response to starvation;GO:0009409//response to cold;GO:0010374//stomatal complex development;GO:0042127//regulation of cell proliferation;GO:0044786//cell cycle DNA replication;GO:0048229//gametophy…
Unigene0000961	0.773	1.01	0.393	1.24	0.74	0.627	0.093	1.377	--	-	-	-	-	-	-	-	-
Unigene0000962	0.567	11.927	3.727	0.347	2.753	4.727	1.95	5.44	alpha-Spec	spectrin alpha chain-like [Rhodamnia argentea]	-	-	-	-	-	-	-
Unigene0000963	1.78	0.313	1.337	2.25	0.76	0.18	1.253	1.13	--	PREDICTED: BRO1 domain-containing protein BROX homolog isoform X2 [Capsicum annuum]	-	-	-	-	-	-	-
Unigene0000966	0.273	1.497	0.377	0.133	0.073	1.883	0.107	0.023	--	-	-	-	-	-	-	-	-
Unigene0000967	0.67	0.427	3.31	0.663	0.38	0.39	0.61	0.567	--	DUF659 domain-containing protein/Dimer_Tnp_hAT domain-containing protein [Cinnamomum micranthum f. kanehirae]	-	-	-	-	-	-	-
Unigene0000968	8.09	6.667	9.147	0.053	2.963	6.9	0.053	0.02	--	-	-	-	-	-	-	-	-
Unigene0000969	0	0.083	0.867	0	0	0.097	3.837	0	--	hypothetical protein Saspl_018966 [Salvia splendens]	-	-	-	-	-	-	-
Unigene0000970	0.427	0.13	0.57	0.073	0.497	0.38	0.043	0.08	--	Transferase [Trema orientale]	-	-	-	-	-	-	-
Unigene0000971	1.15	0	0.583	0.9	0.647	0.08	0	0.56	--	-	-	-	-	-	-	-	-
Unigene0000972	0.223	0.22	0.153	0.2	0.597	0.167	0.33	0.133	--	-	-	-	-	-	-	-	-
Unigene0000973	0.953	0.233	0	0	0.353	0.407	0	0.043	--	-	-	-	-	-	-	-	-
Unigene0000974	0.447	6.213	2.887	0.173	1.237	2.503	0.797	2.64	dpy-22	-	-	-	-	-	-	-	-
Unigene0000975	3.85	1.517	2.787	3.03	2.913	0.947	2.633	2.187	WTF9	protein ROOT PRIMORDIUM DEFECTIVE 1 [Sesamum indicum]	-	-	-	-	-	GO:0003824//catalytic activity	-
Unigene0000976	9.173	6.917	2.477	8.953	5.207	3.693	0.037	3.55	RGA4	disease resistance protein [Striga asiatica]	-	-	-	-	-	-	-
Unigene0000977	0.19	0	0.683	0.473	0.077	0.033	0.113	0.583	R1A	NBS-LRR class resistance protein Fy12-Ry1, partial [Sesamum indicum]	-	-	-	-	-	-	-
Unigene0000978	91.46	0.05	5.393	2.43	30.883	2.837	0.913	1.84	MLP34	kirola-like isoform X1 [Sesamum indicum]	-	-	-	-	GO:0044424//intracellular part	-	GO:0002524//hypersensitivity
Unigene0000980	0.037	0	0.95	0	0.22	0	1.66	0	--	disease resistance protein [Striga asiatica]	-	-	-	-	-	-	-
Unigene0000981	3.65	3.603	11.463	0.013	4.317	6.063	12.31	0	ILL5	IAA-amino acid hydrolase ILR1-like 3 [Vitis vinifera]	-	-	-	-	GO:0043231//intracellular membrane-bounded organelle	GO:0010178//IAA-amino acid conjugate hydrolase activity;GO:0016811//hydrolase activity, acting on carbon-nitrogen (but not peptide) bonds, in linear amides;GO:0070011//peptidase activity, acting on L-amino acid peptides	GO:0042445//hormone metabolic process;GO:0044237//cellular metabolic process
Unigene0000982	1.073	0.11	0.693	0.21	0.667	0.253	0	0.18	--	-	-	-	-	-	-	-	-
Unigene0000983	0.433	0	1.32	0.637	0.577	0.097	0.06	0.173	XTH24	Xyloglucan:xyloglucosyl transferase [Handroanthus impetiginosus]	-	-	-	-	GO:0005576//extracellular region;GO:0030312//external encapsulating structure	GO:0016757//transferase activity, transferring glycosyl groups;GO:0016787//hydrolase activity	GO:0005975//carbohydrate metabolic process;GO:0045229//external encapsulating structure organization
Unigene0000984	5.193	4.707	3.137	2.337	3.587	3.437	1.63	2.383	--	transposase [Oryza sativa Japonica Group]	-	-	-	-	-	-	-
Unigene0000985	0	4.563	0.013	0.52	0	0.623	0	0.297	CYC1-1	Cytochrome c1 1 heme protein mitochondrial [Zea mays]	Metabolism;Metabolism	Global and overview maps;Energy metabolism	ko01100//Metabolic pathways;ko00190//Oxidative phosphorylation	K00413;K00413	-	GO:0046906//tetrapyrrole binding	-
Unigene0000986	0.357	6.35	3.667	0.207	1.33	2.61	0.557	2.66	dnmbp	rho guanine nucleotide exchange factor 4 [Capsaspora owczarzaki ATCC 30864]	-	-	-	-	-	-	-
Unigene0000987	14.347	4.33	11.78	10.313	10.043	5.097	11.983	8.173	FEI2	LRR receptor-like serine/threonine-protein kinase FEI 1 [Sesamum indicum]	-	-	-	-	-	-	-
Unigene0000988	0.343	0.22	1.383	0.203	0.273	0.19	2.4	0.157	At1g68650	PREDICTED: GDT1-like protein 4 [Erythranthe guttata]	-	-	-	-	GO:0009536//plastid;GO:0031224//intrinsic component of membrane	-	GO:0009628//response to abiotic stimulus
Unigene0000989	51.493	21.833	33.42	59.95	32.307	19.383	40.47	47.803	Trmt61a	tRNA (adenine57-N1/adenine58-N1)-methyltransferase [Salvia splendens]	-	-	-	-	-	-	-
Unigene0000990	0.58	0.143	0.717	0.46	0.233	0.33	0.273	0.297	At1g50180	Apoptotic ATPase [Handroanthus impetiginosus]	Organismal Systems	Environmental adaptation	ko04626//Plant-pathogen interaction	K13457	-	-	-
Unigene0000991	0.353	0	0.577	0.293	0.117	0	1.54	0.413	--	-	-	-	-	-	-	-	-
Unigene0000992	0.24	0.117	0.107	0.743	1.33	0.197	0.187	1.173	TTS1	beta-amyrin synthase [Salvia splendens]	Metabolism;Metabolism	Global and overview maps;Metabolism of terpenoids and polyketides	ko01110//Biosynthesis of secondary metabolites;ko00909//Sesquiterpenoid and triterpenoid biosynthesis	K15813;K15813	-	GO:0031559//oxidosqualene cyclase activity	GO:0016104//triterpenoid biosynthetic process
Unigene0000993	1.93	0.21	0.573	3.16	0.467	0.06	1.257	2.843	At1g59620	Apoptotic ATPase [Handroanthus impetiginosus]	-	-	-	-	-	-	-
Unigene0000994	13.723	2.867	5.72	12.183	11.087	4.407	6.683	7.9	RPL5	60S ribosomal protein L5-1 [Hibiscus syriacus]	Genetic Information Processing	Translation	ko03010//Ribosome	K02932	GO:0009536//plastid;GO:0015934//large ribosomal subunit;GO:0016020//membrane	GO:0019843//rRNA binding	GO:0003002//regionalization;GO:0006221//pyrimidine nucleotide biosynthetic process;GO:0009451//RNA modification;GO:0009725//response to hormone;GO:0009887//organ morphogenesis;GO:0010467//gene expression;GO:0016482//cytoplasmic transport;GO:0044723//single-organism carbohydrate metabolic process;GO:0065003//macromolecular complex assembly
Unigene0000995	21.827	5.537	11.767	15.887	18.853	4.79	9.26	8.093	NUDT3	Isopentenyl-diphosphate Delta-isomerase [Handroanthus impetiginosus]	-	-	-	-	GO:0043231//intracellular membrane-bounded organelle;GO:0044444//cytoplasmic part	GO:0003824//catalytic activity;GO:0043169//cation binding	-
Unigene0000996	0.843	0.043	0.617	1.967	0.65	0.05	0.627	1.683	At1g59620	Apoptotic ATPase [Handroanthus impetiginosus]	Organismal Systems	Environmental adaptation	ko04626//Plant-pathogen interaction	K13457	-	-	-
Unigene0000997	13.163	9.217	11.527	12.037	6.877	3.327	13.4	6.867	ORRM2	glycine-rich RNA-binding protein 6, mitochondrial [Sesamum indicum]	-	-	-	-	GO:0043231//intracellular membrane-bounded organelle	GO:0003676//nucleic acid binding	-
Unigene0000998	0.313	0	1.123	0.723	1.07	0	1.27	0.777	At1g59620	probable disease resistance protein At1g58602 [Coffea arabica]	-	-	-	-	-	-	-
Unigene0000999	2.767	1.857	7.15	6.023	1.067	1.757	2.78	4.857	--	SANT/Myb domain [Macleaya cordata]	-	-	-	-	GO:0009536//plastid	GO:0001071//nucleic acid binding transcription factor activity;GO:0005488//binding	GO:0010468//regulation of gene expression
Unigene0001000	0.36	1.567	0.257	0.07	0.22	2.85	0	0.46	--	-	-	-	-	-	-	-	-
Unigene0001001	34.76	28.957	30.95	27.75	23.337	13.173	26.89	18.457	Mctp1	extended synaptotagmin-1 isoform X2 [Sesamum indicum]	-	-	-	-	GO:0043231//intracellular membrane-bounded organelle	-	-
Unigene0001002	0.21	0	0.973	0.047	0.04	0.067	1.313	0.16	At1g59620	Apoptotic ATPase [Handroanthus impetiginosus]	-	-	-	-	-	-	-
Unigene0001003	5.957	0.427	4.057	1.523	12.257	1.357	3.7	1.37	--	-	-	-	-	-	-	-	-
Unigene0001004	9.957	4.82	7.067	7.093	8.677	5.39	8.243	7.273	FH14	Rho GTPase effector BNI1 [Handroanthus impetiginosus]	-	-	-	-	GO:0015629//actin cytoskeleton;GO:0015630//microtubule cytoskeleton;GO:0044444//cytoplasmic part	GO:0003779//actin binding;GO:0015631//tubulin binding;GO:0016791//phosphatase activity	GO:0006796//phosphate-containing compound metabolic process;GO:0007015//actin filament organization;GO:0009555//pollen development
Unigene0001005	1.623	0.653	3.017	1.21	1.207	1.61	3.363	1.327	--	ATP-dependent RNA helicase FAL1-like [Malus domestica]	Genetic Information Processing	Translation	ko03013//RNA transport	K03257	-	-	-
Unigene0001006	0	0	0	4.507	0	0	0	2.127	--	PREDICTED: probable disease resistance RPP8-like protein 4 [Erythranthe guttata]	-	-	-	-	-	-	-
Unigene0001007	22.917	17.14	20.263	18.463	19.13	10.327	17.717	15.713	KEU	Vesicle trafficking protein Sec1 [Handroanthus impetiginosus]	-	-	-	-	GO:0043231//intracellular membrane-bounded organelle;GO:0044425//membrane part;GO:0044444//cytoplasmic part	GO:0005488//binding;GO:0022892//substrate-specific transporter activity	GO:0006605//protein targeting;GO:0007165//signal transduction;GO:0010243//response to organonitrogen compound;GO:0048278//vesicle docking;GO:0061024//membrane organization;GO:1902410//mitotic cytokinetic process
Unigene0001008	2.147	0	0.133	0.183	5.213	0.103	0	0.787	--	-	-	-	-	-	-	-	-
Unigene0001009	24.3	2.557	16.347	21.437	21.97	2.713	8.443	18.54	--	-	-	-	-	-	-	-	-
Unigene0001010	1.413	0	1.06	4.013	0.703	0	0.207	4.163	At1g58390	Apoptotic ATPase [Handroanthus impetiginosus]	-	-	-	-	-	-	-
Unigene0001011	1.687	1.057	0.61	2.58	2.22	0.427	1.433	2.533	At1g58390	Apoptotic ATPase [Handroanthus impetiginosus]	Organismal Systems	Environmental adaptation	ko04626//Plant-pathogen interaction	K13457	-	-	-
Unigene0001012	0.66	0	4.423	0.023	0.24	0.003	0	0.04	RE1	Retrovirus-related Pol polyprotein from transposon TNT 1-94 [Cajanus cajan]	-	-	-	-	-	-	-
Unigene0001013	2.753	4.24	3.13	4.963	1.93	0.83	0.037	3.407	--	PREDICTED: probable disease resistance RPP8-like protein 4 [Erythranthe guttata]	-	-	-	-	-	-	-
Unigene0001014	0	0.087	1.183	0.207	0.287	0.13	1.063	0.233	RPP13L3	probable disease resistance protein RF45 [Coffea arabica]	-	-	-	-	GO:0016020//membrane;GO:0044424//intracellular part	-	GO:0033554//cellular response to stress;GO:0045087//innate immune response
Unigene0001015	29.267	3.99	1.467	15.463	15.32	4.527	0.033	9.58	--	-	-	-	-	-	-	-	-
Unigene0001017	24.01	12.717	13.41	22.29	32.193	21.333	26.023	25.493	LSH10	protein LIGHT-DEPENDENT SHORT HYPOCOTYLS 10-like [Sesamum indicum]	-	-	-	-	GO:0043231//intracellular membrane-bounded organelle	-	GO:0010468//regulation of gene expression
Unigene0001019	2.54	0.69	1.443	2.49	2.447	1.98	0.71	1.177	--	-	-	-	-	-	-	-	-
Unigene0001020	0.173	0	0	1.333	0	0	0.053	1.88	--	-	-	-	-	-	-	-	-
Unigene0001021	0.53	0.83	1.587	0.263	0.273	0.11	1.567	0.263	RPP13L3	probable disease resistance protein At1g58602 [Coffea arabica]	-	-	-	-	-	-	-
Unigene0001022	9.967	4.323	9.65	3.947	11.303	11.343	6.613	8.597	REM4.2	remorin 4.1 [Sesamum indicum]	-	-	-	-	-	-	-
Unigene0001023	1.397	0.083	2.883	0.177	1.093	0.523	0.857	0.27	--	PREDICTED: auxin response factor 8-like isoform X3 [Solanum tuberosum]	-	-	-	-	-	-	-
Unigene0001024	9.803	4.353	5.7	6.827	7.753	3.127	8.667	6.68	--	-	-	-	-	-	-	-	-
Unigene0001025	0.52	0	0.563	0.367	0.713	0.02	0.023	0.943	--	-	-	-	-	-	-	-	-
Unigene0001026	2.723	1.8	1.163	8.347	1.413	0.387	0.797	5.343	--	PREDICTED: probable disease resistance RPP8-like protein 4 [Erythranthe guttata]	-	-	-	-	-	-	-
Unigene0001027	23.46	8.19	19.333	24.523	14.627	10.09	21.63	17.927	--	-	-	-	-	-	-	-	-
Unigene0001028	0.7	1.333	2.837	2.653	0.763	0.607	1.403	2.477	RPP13L3	Apoptotic ATPase [Handroanthus impetiginosus]	Organismal Systems	Environmental adaptation	ko04626//Plant-pathogen interaction	K13457	-	-	-
Unigene0001029	0.153	0.03	0	2.223	0.073	0.023	0	1.04	RPP8L3	Disease resistance protein [Macleaya cordata]	-	-	-	-	-	-	-
Unigene0001030	3.93	0.16	1.38	20.553	4.9	0.13	2.54	11.973	At1g59620	PREDICTED: probable disease resistance RPP8-like protein 2 isoform X1 [Prunus mume]	-	-	-	-	-	-	-
Unigene0001031	0.217	0	1.2	0	0.07	0.03	2.927	0.073	RPP13	Apoptotic ATPase [Handroanthus impetiginosus]	-	-	-	-	-	-	-
Unigene0001032	0.35	0.037	0	0.24	0.487	0.137	0	0.227	--	-	-	-	-	-	-	-	-
Unigene0001034	0	2.91	0	0	0	2.39	0	0	--	-	-	-	-	-	-	-	-
Unigene0001035	1.627	1.33	4.58	2.953	1.777	1.637	3.207	3.487	RPP13L2	PREDICTED: probable disease resistance RPP8-like protein 4 [Erythranthe guttata]	-	-	-	-	-	-	-
Unigene0001037	0	0.197	0	0	0	1.153	0	0	Tm-2(2)	Apoptotic ATPase [Handroanthus impetiginosus]	-	-	-	-	-	-	-
Unigene0001038	0.51	0	0	0	2.98	0.513	0	0.22	--	-	-	-	-	-	-	-	-
Unigene0001039	7.263	4.883	4.697	8.88	4.49	1.58	4.527	6.133	RPP8L3	Apoptotic ATPase [Handroanthus impetiginosus]	Organismal Systems	Environmental adaptation	ko04626//Plant-pathogen interaction	K13457	-	-	GO:0008152//metabolic process
Unigene0001041	1.7	0.107	0.45	4.673	1.937	0.283	0.183	4.297	--	PREDICTED: probable disease resistance RPP8-like protein 4 [Erythranthe guttata]	-	-	-	-	-	-	-
Unigene0001042	0.913	0.07	2.493	0.25	0.103	0.137	3.923	0.163	--	PREDICTED: probable disease resistance RPP8-like protein 4 [Erythranthe guttata]	-	-	-	-	-	-	-
Unigene0001044	4.83	1.563	9.203	5.97	3.35	1.227	17.117	7.18	RPP13L3	Apoptotic ATPase [Handroanthus impetiginosus]	-	-	-	-	-	-	-
Unigene0001045	0.307	0.99	2.913	0	0.677	1.44	4.49	0.03	--	-	-	-	-	-	-	-	-
Unigene0001046	5.193	0.403	0.087	2.84	1.267	0.677	0.14	1.657	--	PREDICTED: probable disease resistance RPP8-like protein 4 [Erythranthe guttata]	Organismal Systems	Environmental adaptation	ko04626//Plant-pathogen interaction	K13457	-	-	-
Unigene0001047	0.577	0.03	0	0.06	3.337	0	0	0.14	--	-	-	-	-	-	-	-	-
Unigene0001048	2.24	1.387	1.96	3.96	1.247	0.687	2.663	2.473	At1g58602	Apoptotic ATPase [Handroanthus impetiginosus]	-	-	-	-	-	-	-
Unigene0001049	5.82	3.827	3.533	0.147	2.217	1.053	4.077	0.49	--	PREDICTED: probable disease resistance RPP8-like protein 4 [Erythranthe guttata]	-	-	-	-	-	-	-
Unigene0001050	0	0.103	0	8.19	0	0.187	0.013	6.507	RPP13L2	Apoptotic ATPase [Handroanthus impetiginosus]	-	-	-	-	-	-	-
Unigene0001051	0.29	0	0.54	0	0.097	0.13	0.46	0	At1g58390	Disease resistance protein [Macleaya cordata]	Organismal Systems	Environmental adaptation	ko04626//Plant-pathogen interaction	K13457	-	-	-
Unigene0001052	6.42	0.587	1.107	3.27	20.27	0.257	1.78	0.56	--	-	-	-	-	-	-	-	-
Unigene0001053	2	0.84	5.723	1.797	1.493	1.42	8.45	1.717	--	ATP-dependent DNA helicase PIF1-like [Arachis duranensis]	-	-	-	-	-	-	-
Unigene0001054	0.223	0	9.967	5.517	0.197	0.033	3.157	4.433	R1A-3	NBS-LRR type resistance protein [Striga asiatica]	-	-	-	-	-	-	-
Unigene0001056	5.533	2.503	0.61	0	1.21	1.953	0.62	0	At1g58602	Apoptotic ATPase [Handroanthus impetiginosus]	-	-	-	-	-	-	-
Unigene0001057	2.733	16.787	2.25	1.66	1.323	6.437	2.23	0.977	At1g58390	Apoptotic ATPase [Handroanthus impetiginosus]	-	-	-	-	-	-	-
Unigene0001058	101.297	0.4	15.34	17.763	63.973	18.17	13.587	54.4	APS1	Acid phosphatase [Handroanthus impetiginosus]	-	-	-	-	-	GO:0016787//hydrolase activity	GO:0008152//metabolic process
Unigene0001059	1.347	1.127	1.397	2.317	0.82	1.07	1.08	1.88	TBL18	hypothetical protein DCAR_020222 [Daucus carota subsp. sativus] [Daucus carota]	-	-	-	-	-	-	-
Unigene0001060	0.617	0.06	0.123	0.293	0.147	0.19	0.28	0.17	--	-	-	-	-	-	-	-	-
Unigene0001061	1.193	0.163	0	0	0.237	0.093	0	0	--	-	-	-	-	-	-	-	-
Unigene0001062	0.293	0.17	0.18	1.317	0.313	0.103	0.177	0.857	--	-	-	-	-	-	-	-	-
Unigene0001063	13.277	1.137	0.227	0.037	1.873	1.377	0.44	0	RPP13	PREDICTED: probable disease resistance RPP8-like protein 4 [Erythranthe guttata]	-	-	-	-	-	-	-
Unigene0001064	1.343	0.65	3.813	1.043	1.453	1.283	6.39	1.01	RPP13L3	Apoptotic ATPase [Handroanthus impetiginosus]	-	-	-	-	-	-	-
Unigene0001065	1.88	1.143	3.457	6.877	1.437	0.6	0.867	5.837	At1g59620	Apoptotic ATPase [Handroanthus impetiginosus]	-	-	-	-	-	-	-
Unigene0001066	0.69	0	0.45	0.067	0.16	0	0.23	0.333	--	-	-	-	-	-	-	-	-
Unigene0001067	0.71	0.567	0.377	0.06	0.05	0.053	1.403	0.317	--	Apoptotic ATPase [Handroanthus impetiginosus]	-	-	-	-	-	-	-
Unigene0001068	5.13	1.063	0.79	10.38	3.07	1.6	0.31	7.213	RPP13L3	Apoptotic ATPase [Handroanthus impetiginosus]	-	-	-	-	-	-	GO:0006952//defense response
Unigene0001069	2.89	0.6	3.237	11.9	3.107	0.427	5.373	9.617	At1g58390	Apoptotic ATPase [Handroanthus impetiginosus]	-	-	-	-	-	-	-
Unigene0001070	1.353	1.603	1.06	0.377	0.453	0.683	1.493	0.42	At1g58390	Apoptotic ATPase [Handroanthus impetiginosus]	-	-	-	-	-	-	-
Unigene0001071	0.683	0	0.957	0.137	0.22	0.1	2.713	0.23	--	PREDICTED: probable disease resistance RPP8-like protein 4 [Erythranthe guttata]	Organismal Systems	Environmental adaptation	ko04626//Plant-pathogen interaction	K13457	-	-	-
Unigene0001072	0.9	0.297	0.063	0.453	1.24	0.227	0.17	0.653	--	hypothetical protein Saspl_027403 [Salvia splendens]	-	-	-	-	-	-	-
Unigene0001073	5.723	2.76	5.43	3.8	5.29	2.623	5.14	3.09	GGH2	ATP synthase mitochondrial F1 complex assembly factor 2 [Striga asiatica]	-	-	-	-	GO:0043231//intracellular membrane-bounded organelle	GO:0008242//omega peptidase activity	GO:0009064//glutamine family amino acid metabolic process;GO:0019538//protein metabolic process
Unigene0001074	1.07	0.137	2.53	2.423	1.697	1.367	5.25	3.11	--	-	-	-	-	-	-	-	-
Unigene0001075	3.753	0.477	1.963	4.417	3.63	0.53	1.553	3.49	At1g58390	Apoptotic ATPase [Handroanthus impetiginosus]	-	-	-	-	-	-	-
Unigene0001076	0	0	1.083	0	0	0	1.083	0	--	PREDICTED: probable disease resistance RPP8-like protein 4 [Erythranthe guttata]	-	-	-	-	-	-	-
Unigene0001077	8.147	0.313	0.287	0	1.587	0.64	0.28	0.03	RXW24L	Apoptotic ATPase [Handroanthus impetiginosus]	-	-	-	-	-	-	-
Unigene0001078	0.513	0.353	3.383	1.553	1.27	0.787	2.833	1.81	--	Apoptotic ATPase [Handroanthus impetiginosus]	-	-	-	-	-	-	-
Unigene0001079	2.88	1.38	10.69	5.957	4.853	2.493	12.54	6.593	--	-	-	-	-	-	-	-	-
Unigene0001080	0.33	0.03	2.27	0	0.087	0.253	2.87	0	--	NIMA (never in mitosis protein a)-related kinase [Salvia splendens]	-	-	-	-	-	-	-
Unigene0001081	2.66	0	0.13	0	1.033	0	0	0	2021-10-03	organic cation/carnitine transporter 3-like [Sesamum indicum]	-	-	-	-	-	-	-
Unigene0001082	0.36	0.327	0.357	1.89	0.213	0.193	0.247	1.117	--	replication protein A 70 kDa DNA-binding subunit [Striga asiatica]	-	-	-	-	-	-	-
Unigene0001083	7.403	8.367	13.803	17.277	13.177	8.877	7.077	22.217	--	Apoptotic ATPase [Handroanthus impetiginosus]	-	-	-	-	-	-	-
Unigene0001084	0	6.73	0	0	0	11.143	0	0	--	-	-	-	-	-	-	-	-
Unigene0001085	2.173	0.423	2.003	1.97	2.697	1.15	2.217	2.017	DHAR2	PREDICTED: glutathione S-transferase DHAR3, chloroplastic, partial [Erythranthe guttata]	Metabolism;Metabolism;Metabolism	Global and overview maps;Metabolism of other amino acids;Carbohydrate metabolism	ko01100//Metabolic pathways;ko00480//Glutathione metabolism;ko00053//Ascorbate and aldarate metabolism	K21888;K21888;K21888	GO:0005576//extracellular region;GO:0009526//plastid envelope;GO:0009532//plastid stroma;GO:0016020//membrane;GO:0042579//microbody	GO:0005216//ion channel activity;GO:0015038//glutathione disulfide oxidoreductase activity;GO:0043168//anion binding;GO:0046914//transition metal ion binding	GO:0000302//response to reactive oxygen species;GO:0001101//response to acid chemical;GO:0006464//cellular protein modification process;GO:0009404//toxin metabolic process;GO:0009608//response to symbiont;GO:0009668//plastid membrane organization;GO:0009725//response to hormone;GO:0010038//response to metal ion;GO:0014070//response to organic cyclic compound;GO:0034220//ion transmembrane transpor…
Unigene0001086	0.67	0.763	0.087	0	0.087	0	0.037	0	--	-	-	-	-	-	-	-	-
Unigene0001088	4.99	0	0	0	1.043	0.027	0.033	0	--	-	-	-	-	-	-	-	-
Unigene0001089	0.187	0.74	0.053	0	0	0.08	0	0	--	-	-	-	-	-	-	-	-
Unigene0001090	0	1.08	0.067	0.033	0.11	0.217	0	0.143	--	protein isoform b, partial [Chrysochromulina tobinii]	-	-	-	-	-	-	-
Unigene0001091	1.68	0.637	2.173	1.483	0.987	0.88	1.773	0.863	--	-	-	-	-	-	-	-	-
Unigene0001092	0.627	6.123	3.16	0.4	1.26	2.023	0.907	1.87	TRNAU1AP	nucleic acid binding protein [Capsaspora owczarzaki ATCC 30864]	-	-	-	-	GO:0043231//intracellular membrane-bounded organelle;GO:0044444//cytoplasmic part	GO:0003723//RNA binding	GO:0006950//response to stress;GO:0009266//response to temperature stimulus
Unigene0001093	1.017	0.793	10.467	0.387	0.12	0.667	10.837	0.05	--	-	-	-	-	-	-	-	-
Unigene0001094	0.43	0	0	3.357	0.13	0	0	0.843	--	-	-	-	-	-	-	-	-
Unigene0001095	0.467	8.673	4.637	0.177	2.397	3.56	1.393	3.583	--	-	-	-	-	-	-	-	-
Unigene0001096	1.55	0.383	2.517	0.847	0.603	0.403	0.967	0.713	--	-	-	-	-	-	-	-	-
Unigene0001097	0.193	0.527	0.887	0.107	0.36	0.607	0.063	1.25	--	-	-	-	-	-	-	-	-
Unigene0001098	1.427	0.507	0.18	1.693	1.777	0.453	0.09	1.257	--	-	-	-	-	-	-	-	-
Unigene0001099	0.063	0	0.52	0.183	0.12	0	0.253	0.137	--	-	-	-	-	-	-	-	-
Unigene0001100	43.497	12.27	29.113	32.683	41.717	21.937	49.953	24.527	R1B-17	Apoptotic ATPase [Handroanthus impetiginosus]	-	-	-	-	-	-	-
Unigene0001101	12.97	4.12	7.057	5.97	5.657	2.783	6.79	3.383	--	Sperm acrosome-associated protein [Actinidia chinensis var. chinensis] [Actinidia chinensis]	-	-	-	-	-	-	-
Unigene0001102	26.44	10.193	14.933	11.973	28.43	13.107	15.577	10.49	FH3	Formin-like protein [Actinidia chinensis var. chinensis] [Actinidia chinensis]	-	-	-	-	GO:0015629//actin cytoskeleton;GO:0015630//microtubule cytoskeleton;GO:0044444//cytoplasmic part	GO:0003779//actin binding;GO:0015631//tubulin binding;GO:0016791//phosphatase activity	GO:0006796//phosphate-containing compound metabolic process;GO:0007015//actin filament organization;GO:0009555//pollen development
Unigene0001103	19.37	0.473	18.89	13.897	20.477	8.857	15.853	15.747	At4g22990	arsenite-transporting ATPase [Salvia splendens]	-	-	-	-	-	-	GO:0044763//single-organism cellular process
Unigene0001104	1.447	0.237	0	0.777	0.89	0.133	0	0.657	--	-	-	-	-	-	-	-	-
Unigene0001105	0.05	0.073	2.943	5.063	0.077	0.077	5.873	4.487	BAK1	LRR receptor kinase BAK1 [Vitis vinifera]	Organismal Systems;Environmental Information Processing;Environmental Information Processing	Environmental adaptation;Signal transduction;Signal transduction	ko04626//Plant-pathogen interaction;ko04016//MAPK signaling pathway - plant;ko04075//Plant hormone signal transduction	K13416;K13416;K13416	GO:0016020//membrane;GO:0032991//macromolecular complex;GO:0043231//intracellular membrane-bounded organelle	GO:0004672//protein kinase activity;GO:0005102//receptor binding;GO:0016491//oxidoreductase activity;GO:0036094//small molecule binding;GO:0046983//protein dimerization activity;GO:0097159//organic cyclic compound binding;GO:1901363//heterocyclic compound binding	GO:0002239//response to oomycetes;GO:0002252//immune effector process;GO:0006468//protein phosphorylation;GO:0006605//protein targeting;GO:0009617//response to bacterium;GO:0009620//response to fungus;GO:0010243//response to organonitrogen compound;GO:0040007//growth;GO:0043067//regulation of programmed cell death;GO:0043401//steroid hormone mediated signaling pathway;GO:0044710//single-organism …
Unigene0001106	0.31	4.113	0.24	5.87	0.477	3.017	0.537	4.567	--	-	-	-	-	-	-	-	-
Unigene0001107	85.02	5.457	48.353	9.247	37.503	97.417	8.597	4.93	MLP165	PREDICTED: kirola-like isoform X1 [Erythranthe guttata]	-	-	-	-	GO:0005737//cytoplasm;GO:0043231//intracellular membrane-bounded organelle	-	GO:0002524//hypersensitivity
Unigene0001108	18.32	10.267	16.56	18.547	11.757	7.59	12.637	13.56	XRN3	5'-3' exoribonuclease 2 [Salvia splendens]	-	-	-	-	GO:0043231//intracellular membrane-bounded organelle	GO:0008409//5'-3' exonuclease activity	GO:0000280//nuclear division;GO:0000723//telomere maintenance;GO:0007059//chromosome segregation;GO:0010467//gene expression;GO:0010586//miRNA metabolic process;GO:0019219//regulation of nucleobase-containing compound metabolic process;GO:0022402//cell cycle process;GO:0033043//regulation of organelle organization;GO:0044248//cellular catabolic process;GO:0048856//anatomical structure development…
Unigene0001109	12.16	4.923	10.227	12.93	13.203	7.36	12.33	9.693	LARP6B	La-related protein 7 [Salvia splendens]	-	-	-	-	GO:0032991//macromolecular complex;GO:0043231//intracellular membrane-bounded organelle;GO:0044423//virion part	GO:0003676//nucleic acid binding	GO:0010467//gene expression
Unigene0001110	2.197	0.143	0.127	0.307	0.39	0.13	0.35	0.22	--	pectinesterase inhibitor-like [Sesamum indicum]	-	-	-	-	-	-	-
Unigene0001112	0.507	0.203	0.063	0.153	0.257	0.133	0	0.16	--	-	-	-	-	-	-	-	-
Unigene0001113	1.057	0.78	0.39	0	0.23	0.317	0.243	0	--	Apoptotic ATPase [Handroanthus impetiginosus]	-	-	-	-	-	-	-
Unigene0001114	0.86	0.307	1.543	1.157	1.203	0.477	0.697	0.74	--	phospholipase D1/2 [Salvia splendens]	-	-	-	-	GO:0043231//intracellular membrane-bounded organelle	-	GO:0006396//RNA processing
Unigene0001115	1.807	0.28	2.77	2.637	1.303	1.09	1.627	1.52	At1g50180	Apoptotic ATPase [Handroanthus impetiginosus]	-	-	-	-	-	-	GO:0008152//metabolic process
Unigene0001116	0.53	0.117	0.63	0.55	0.133	0	0.66	0.107	--	-	-	-	-	-	-	-	-
Unigene0001117	0.59	0.33	0.76	1.643	1.033	0.747	1.27	1.363	--	-	-	-	-	-	-	-	-
Unigene0001118	0.66	14.65	4.113	0.19	1.607	3.893	0.9	2.76	IP6K2	Inositol hexakisphosphate kinase 3 [Porphyridium purpureum]	Environmental Information Processing	Signal transduction	ko04070//Phosphatidylinositol signaling system	K07756	GO:0044464//cell part	GO:0016301//kinase activity;GO:0016773//phosphotransferase activity, alcohol group as acceptor	GO:0044699//single-organism process
Unigene0001119	0.447	4.893	3.793	0.233	1.033	1.83	0.463	2.107	ube3b	PREDICTED: ubiquitin-protein ligase E3B-like [Erythranthe guttata]	Genetic Information Processing	Folding, sorting and degradation	ko04120//Ubiquitin mediated proteolysis	K10589	-	-	-
Unigene0001120	0.637	6.873	2.037	0.327	1.267	2.067	0.727	1.767	acp4	Prostatic acid phosphatase [Gracilariopsis chorda]	-	-	-	-	-	-	-
Unigene0001121	0.167	4.54	4.563	0.41	1.197	2.85	1.577	6.997	Cyp2g1	S-canadine synthase-like protein [Cinnamomum micranthum f. kanehirae]	-	-	-	-	-	GO:0016705//oxidoreductase activity, acting on paired donors, with incorporation or reduction of molecular oxygen	GO:0044271//cellular nitrogen compound biosynthetic process;GO:0065007//biological regulation;GO:1901360//organic cyclic compound metabolic process;GO:1901566//organonitrogen compound biosynthetic process
Unigene0001122	0.783	0.383	0.96	0	0.46	0.543	0.83	0	--	-	-	-	-	-	-	-	-
Unigene0001124	0.58	0.53	0	0	0.793	0.773	0	0.037	--	-	-	-	-	-	-	-	-
Unigene0001125	0.07	3.67	0.47	0	0	1.293	0.683	0	--	adenylate cyclase [Striga asiatica]	-	-	-	-	-	-	-
Unigene0001126	0.037	1.167	0.427	0	0.037	0.44	0.07	0.283	gar-1	-	-	-	-	-	-	-	-
Unigene0001127	19.587	8.137	16.95	20.467	16.53	9.217	18.1	14.853	ISY1	pre-mRNA-splicing factor ISY1 [Salvia splendens]	Genetic Information Processing	Transcription	ko03040//Spliceosome	K12870	GO:0009536//plastid	-	-
Unigene0001128	0	0.25	0.98	0	0	0.283	0.16	0	--	disease resistance protein [Striga asiatica]	-	-	-	-	-	-	-
Unigene0001129	0.337	2.033	0.923	0.12	0.533	1.19	0.073	0.85	--	-	-	-	-	-	-	-	-
Unigene0001131	59.403	35.583	48.113	49.907	59.653	25.2	42.623	48.75	GTE7	transcription factor GTE7-like [Sesamum indicum]	-	-	-	-	-	GO:0005515//protein binding	GO:0008152//metabolic process;GO:0009292//genetic transfer
Unigene0001132	0.11	1.147	0.393	0.08	0.317	1.067	0	0.603	--	exostosin-1c-like [Physcomitrella patens]	-	-	-	-	-	-	-
Unigene0001133	0	1.567	1.76	0	0	1.267	0	0	--	-	-	-	-	-	-	-	-
Unigene0001134	0	1.327	0	0	0.03	1.64	0	0	--	PREDICTED: histidine-containing phosphotransfer protein 1-like [Nicotiana tabacum]	Environmental Information Processing	Signal transduction	ko04075//Plant hormone signal transduction	K14490	-	-	-
Unigene0001135	0.37	0.323	0.283	0.377	0.16	0.303	1.017	0.473	--	-	-	-	-	-	-	-	-
Unigene0001136	2.88	1.07	3.457	3.283	2.137	1.27	4.14	1.923	RPS15AB	small subunit ribosomal protein S15Ae [Salvia splendens]	Genetic Information Processing	Translation	ko03010//Ribosome	K02957	GO:0009536//plastid;GO:0015935//small ribosomal subunit	-	GO:0010467//gene expression
Unigene0001137	0.477	0	0	1.873	1.39	0.03	0	1.17	--	-	-	-	-	-	-	-	-
Unigene0001138	0.053	1.09	0.2	0.067	0.273	0.243	0.12	0.173	CDC5L	PREDICTED: cell division cycle 5-like protein [Raphanus sativus]	Genetic Information Processing	Transcription	ko03040//Spliceosome	K12860	GO:0009536//plastid;GO:0030529//intracellular ribonucleoprotein complex	GO:0001071//nucleic acid binding transcription factor activity;GO:0003676//nucleic acid binding	GO:0002218//activation of innate immune response;GO:0006259//DNA metabolic process;GO:0006396//RNA processing;GO:0007049//cell cycle;GO:0009617//response to bacterium;GO:0009620//response to fungus;GO:0010468//regulation of gene expression;GO:0034645//cellular macromolecule biosynthetic process
Unigene0001139	22.137	8.753	12.567	18.97	15.813	6.617	14.887	11.953	RGLG1	E3 ubiquitin-protein ligase RGLG [Salvia splendens]	-	-	-	-	-	GO:0003824//catalytic activity;GO:0046914//transition metal ion binding	GO:0006952//defense response;GO:0007165//signal transduction;GO:0009696//salicylic acid metabolic process
Unigene0001140	0.463	13.89	3.197	0.313	2.64	4.677	1.913	5.053	beta-Spec	spectrin beta chain-like [Rhodamnia argentea]	-	-	-	-	GO:0044464//cell part	-	GO:0044763//single-organism cellular process
Unigene0001141	1.157	4.937	1.963	0.34	0.547	3.823	0.453	0.033	--	-	-	-	-	-	-	-	-
Unigene0001142	6.633	0.94	7.113	5.357	5.107	2.47	5.797	4.417	At1g16860	Ubiquitin-specific protease family C19-related protein [Prunus dulcis]	-	-	-	-	-	GO:0016787//hydrolase activity	-
Unigene0001143	1.277	0.73	1.763	1.323	0.693	0.29	2.18	0.59	--	-	-	-	-	-	-	-	-
Unigene0001144	2.05	0.667	0.14	0	0.683	0.96	0.483	0	--	-	-	-	-	-	-	-	-
Unigene0001145	2.43	0	0.07	0	0.7	0.04	0.237	0	At3g52680	F-box/LRR-repeat protein 25-like isoform X2 [Olea europaea var. sylvestris] [Olea europaea]	-	-	-	-	-	-	-
Unigene0001146	1.167	0.257	0.4	0.673	0.35	0.597	0	1.123	--	-	-	-	-	-	-	-	-
Unigene0001147	14.98	3.983	9.757	9.697	11.137	6.033	6.427	6.51	nvl	ribosome biogenesis ATPase [Salvia splendens]	Genetic Information Processing	Translation	ko03008//Ribosome biogenesis in eukaryotes	K14571	GO:0044424//intracellular part	GO:0016787//hydrolase activity	GO:0006396//RNA processing;GO:0006464//cellular protein modification process;GO:0010468//regulation of gene expression;GO:0044763//single-organism cellular process
Unigene0001148	1.62	0	0	0	0.543	0	0	0	--	-	-	-	-	-	-	-	-
Unigene0001149	0.633	0	0	0.247	1.143	0.127	0	0	--	-	-	-	-	-	-	-	-
Unigene0001150	0.987	0.027	4.11	0.063	0.397	0.12	7.29	0.123	--	PREDICTED: zonadhesin-like [Erythranthe guttata]	-	-	-	-	-	-	-
Unigene0001151	3.717	0.707	1.82	3.167	2.433	1.097	2.713	2.153	--	pentatricopeptide repeat protein [Salvia miltiorrhiza]	-	-	-	-	-	-	-
Unigene0001152	0.463	0.357	0.99	0.61	0.63	0.337	1.017	1.21	NPF6.4	solute carrier family 15 (peptide/histidine transporter), member 3/4 [Salvia splendens]	-	-	-	-	GO:0031224//intrinsic component of membrane	GO:0015291//secondary active transmembrane transporter activity	GO:0015833//peptide transport;GO:0042126//nitrate metabolic process
Unigene0001153	0.7	0	0.027	1.153	0.39	0	0.023	0.163	--	-	-	-	-	-	-	-	-
Unigene0001154	1.7	0.08	4.413	3.27	0.46	0.233	3.83	0.823	HB2	non-symbiotic hemoglobin 2 [Sesamum indicum]	-	-	-	-	GO:0044424//intracellular part	GO:0022892//substrate-specific transporter activity;GO:0046872//metal ion binding	GO:0006641//triglyceride metabolic process;GO:0006810//transport;GO:0009725//response to hormone;GO:0032787//monocarboxylic acid metabolic process;GO:0050789//regulation of biological process
Unigene0001156	115.12	40.05	79.603	125.937	49.07	38.36	77.15	81.503	--	-	-	-	-	-	-	-	-
Unigene0001157	0.073	0.65	0.193	0.177	0.08	0.61	0.55	0	--	-	-	-	-	-	-	-	-
Unigene0001158	14.423	0	0.613	0.597	3.913	0.06	0.277	0.49	--	-	-	-	-	-	-	-	-
Unigene0001159	0.743	0.063	0.643	0.283	0.587	0.047	0.06	0.203	--	-	-	-	-	-	-	-	-
Unigene0001160	0.087	0.543	0.36	0.12	0.24	0.263	0.887	0.22	--	-	-	-	-	-	-	-	-
Unigene0001161	3.3	1.24	2.58	3.19	2.313	0.85	2.507	2.327	--	-	-	-	-	-	-	-	-
Unigene0001162	1.91	0.703	0.587	0.88	0.797	0.353	0.463	0.557	--	-	-	-	-	-	-	-	-
Unigene0001163	3.187	0.22	0.237	0.697	0.563	0.223	0	0.533	--	-	-	-	-	-	-	-	-
Unigene0001164	3.14	0.717	14.1	2.417	2.04	1.627	4.34	1.807	--	-	-	-	-	-	-	-	-
Unigene0001165	0	1.02	0.05	0	0	0.183	0.04	0.39	--	-	-	-	-	-	-	-	-
Unigene0001166	0.937	3.31	4.943	1.97	0.913	2.08	3.087	0.57	CYP72A225	cytochrome P450 CYP72A331 [Salvia miltiorrhiza]	-	-	-	-	GO:0016020//membrane	GO:0016491//oxidoreductase activity;GO:0046872//metal ion binding	-
Unigene0001167	7.077	4.333	6.753	6.573	5.793	4.703	5.903	5.41	RRP4	exosome complex component RRP4 [Salvia splendens]	Genetic Information Processing	Folding, sorting and degradation	ko03018//RNA degradation	K03679	GO:0009536//plastid;GO:0030529//intracellular ribonucleoprotein complex;GO:0044432//endoplasmic reticulum part	GO:0003676//nucleic acid binding;GO:0005198//structural molecule activity;GO:0016491//oxidoreductase activity;GO:0042562//hormone binding;GO:0046914//transition metal ion binding	GO:0000902//cell morphogenesis;GO:0008361//regulation of cell size;GO:0009755//hormone-mediated signaling pathway;GO:0010467//gene expression;GO:0032875//regulation of DNA endoreduplication;GO:0044707//single-multicellular organism process;GO:0048522//positive regulation of cellular process;GO:1902410//mitotic cytokinetic process
Unigene0001168	5.38	3.183	4.307	3.74	5.34	2.393	4.017	3.003	RNL	tRNA ligase 1 [Sesamum indicum]	-	-	-	-	-	GO:0016874//ligase activity	GO:0010467//gene expression;GO:0044238//primary metabolic process;GO:0044260//cellular macromolecule metabolic process
Unigene0001169	1.997	0.86	0	0.867	1.127	0.79	0	1.44	--	-	-	-	-	-	-	-	-
Unigene0001170	0.16	2.187	1.543	0.27	0.523	0.983	0.85	2.38	CYP2J2	Flavonoid 3'-monooxygenase [Nymphaea thermarum]	Metabolism;Metabolism;Metabolism;Metabolism;Metabolism	Global and overview maps;Global and overview maps;Biosynthesis of other secondary metabolites;Biosynthesis of other secondary metabolites;Biosynthesis of other secondary metabolites	ko01100//Metabolic pathways;ko01110//Biosynthesis of secondary metabolites;ko00940//Phenylpropanoid biosynthesis;ko00941//Flavonoid biosynthesis;ko00945//Stilbenoid, diarylheptanoid and gingerol biosynthesis	K09754;K09754;K09754;K09754;K09754	-	-	-
Unigene0001171	0.737	0.253	0.267	0.777	0.68	0.19	0.58	0.41	TOGT1	UDP-glycosyltransferase 90A1 [Sesamum indicum]	-	-	-	-	-	GO:0016757//transferase activity, transferring glycosyl groups	-
Unigene0001172	0.457	5.15	2.257	0.133	1.44	2.433	0.637	2.277	BIRC6	protein bir1-like [Quercus suber]	-	-	-	-	-	-	-
Unigene0001173	1.353	0.123	0.263	1.323	1.007	0.21	0.237	0.83	--	-	-	-	-	-	-	-	-
Unigene0001174	0.78	0.443	1.497	0.677	0.27	0.437	2.08	0.423	MYB2	MYB-related transcription factor [Salvia miltiorrhiza]	-	-	-	-	GO:0043231//intracellular membrane-bounded organelle	GO:0001071//nucleic acid binding transcription factor activity;GO:0003676//nucleic acid binding	GO:0001101//response to acid chemical;GO:0010468//regulation of gene expression
Unigene0001175	0.767	0.153	0.567	0.53	0.13	0.56	0.287	0.417	--	-	-	-	-	-	-	-	-
Unigene0001176	0.17	0.06	0	0.65	0.71	0	0	0.97	RGA3	NBS-LRR-like protein, partial [Mentha longifolia]	-	-	-	-	-	-	-
Unigene0001177	0.33	0.277	0.32	0.433	0.483	0.173	0.333	0.413	--	-	-	-	-	-	-	-	-
Unigene0001178	0.163	0.12	1.36	0.323	0.053	0.283	2.557	0.39	TCTP	Translationally-controlled tumor protein-like protein [Hibiscus syriacus]	-	-	-	-	GO:0005576//extracellular region;GO:0005911//cell-cell junction;GO:0009536//plastid;GO:0031090//organelle membrane;GO:0042995//cell projection	GO:0015631//tubulin binding	GO:0000278//mitotic cell cycle;GO:0000280//nuclear division;GO:0000904//cell morphogenesis involved in differentiation;GO:0003006//developmental process involved in reproduction;GO:0009414//response to water deprivation;GO:0009617//response to bacterium;GO:0009755//hormone-mediated signaling pathway;GO:0010038//response to metal ion;GO:0010119//regulation of stomatal movement;GO:0016049//cell gro…
Unigene0001179	8.217	4.443	4.26	0	6.26	4.023	0.06	0	--	-	-	-	-	-	-	-	-
Unigene0001180	0.967	0.08	1.253	0.11	0.517	0.18	0.177	0.32	--	-	-	-	-	-	-	-	-
Unigene0001181	20.1	0.313	0.537	32.457	19.76	0.387	0.337	26.863	--	kelch-like protein 17 (actinfilin) [Salvia splendens]	-	-	-	-	-	-	GO:0009718//anthocyanin-containing compound biosynthetic process;GO:0009888//tissue development;GO:0048437//floral organ development
Unigene0001182	0.393	0	0.593	0	0.04	0.387	1.013	0	--	-	-	-	-	-	-	-	-
Unigene0001183	55.437	0.22	0.333	0.177	0.19	0.137	0.2	0.24	--	cilia- and flagella-associated protein 251-like [Arachis duranensis]	-	-	-	-	-	-	-
Unigene0001184	0	1.137	1.203	0	0.027	0.56	1.123	0.04	--	-	-	-	-	-	-	-	-
Unigene0001185	2.727	0.02	1.033	2.223	5.123	0	4.513	3.923	--	-	-	-	-	-	-	-	-
Unigene0001186	0	1.833	0.18	0	0	0.257	0.047	0	--	-	-	-	-	-	-	-	-
Unigene0001187	0.45	0.253	1.263	1.403	0.703	0.133	0.653	0.787	--	-	-	-	-	-	-	-	-
Unigene0001188	0	3.43	0	0	0	0	0	0	yteR	uncharacterized protein LOC112273499 [Physcomitrella patens]	-	-	-	-	-	-	-
Unigene0001189	0.053	0	1.23	0.173	0	0	1.843	0.107	ECT2	ATP-dependent RNA helicase DDX5/DBP2 [Salvia splendens]	-	-	-	-	GO:0043231//intracellular membrane-bounded organelle;GO:0044444//cytoplasmic part	-	-
Unigene0001190	2.257	0.557	1.99	1.26	1.82	0.887	1.76	1.093	--	alpha-glucosidase [Salvia splendens]	-	-	-	-	-	-	-
Unigene0001191	0.287	0.553	3.137	0.16	0.27	0.127	0	0.2	--	hypothetical protein Saspl_031321 [Salvia splendens]	-	-	-	-	-	-	-
Unigene0001192	3.973	0	0	0	1.493	0.03	0	0	--	-	-	-	-	-	-	-	-
Unigene0001193	0.803	7.46	4.147	0.38	2.9	4.343	1.363	4.48	RDR1	PREDICTED: RNA-dependent RNA polymerase 1-like isoform X1 [Populus euphratica]	-	-	-	-	-	-	GO:0001101//response to acid chemical;GO:0006952//defense response;GO:0009058//biosynthetic process;GO:0010468//regulation of gene expression;GO:0044237//cellular metabolic process;GO:0044763//single-organism cellular process;GO:0050794//regulation of cellular process;GO:0051707//response to other organism;GO:0051716//cellular response to stimulus
Unigene0001194	0.25	7.857	0.983	0.123	0.753	2.157	0.837	1.943	gst-8	Hematopoietic prostaglandin D synthase [Gracilariopsis chorda]	Metabolism;Metabolism;Metabolism	Global and overview maps;Metabolism of other amino acids;Lipid metabolism	ko01100//Metabolic pathways;ko00480//Glutathione metabolism;ko00590//Arachidonic acid metabolism	K04097;K04097;K04097	-	-	-
Unigene0001195	0.02	1.957	1.383	0.09	0.217	0.523	0.343	0.58	Phox2a	homeobox protein orthopedia-like [Rhodamnia argentea]	-	-	-	-	-	-	-
Unigene0001196	0.08	1.78	0.293	0.05	0.163	0.14	0	0.17	--	-	-	-	-	-	-	-	-
Unigene0001198	9.963	9.277	0	14.12	6.93	9.31	0.04	9.45	--	-	-	-	-	-	-	-	-
Unigene0001199	5.957	1.08	1.393	4.627	3.027	0.333	2.02	1.383	--	myb-binding protein 1A-like protein [Sesamum indicum]	-	-	-	-	-	-	-
Unigene0001200	6.003	0.993	0.013	6.133	3.05	0.647	0	5.583	At5g02930	F-box/LRR-repeat protein 25-like isoform X2 [Olea europaea var. sylvestris] [Olea europaea]	-	-	-	-	-	-	-
Unigene0001201	0.323	0.653	2.637	0	0.597	0.87	0	0	--	-	-	-	-	-	-	-	-
Unigene0001202	0.487	7.5	4.3	0.307	1.817	3.48	1.27	4.137	Vps13	vacuolar protein sorting-associated protein 13-like [Quercus suber]	-	-	-	-	-	-	-
Unigene0001203	2.02	1.923	2.36	4.3	2.463	1.5	3.16	2.057	--	transcription termination factor MTERF2, chloroplastic-like [Sesamum indicum]	-	-	-	-	-	-	-
Unigene0001204	0.343	0.047	0.07	0.347	1.03	0.037	0.233	0.523	SLC35F1	solute carrier family 35, member F1/2 [Salvia splendens]	-	-	-	-	-	-	-
Unigene0001206	0.65	0.307	2.097	1.19	0.323	0.567	2	0.5	ZDP	PREDICTED: polynucleotide 3'-phosphatase ZDP [Erythranthe guttata]	-	-	-	-	GO:0031981//nuclear lumen	GO:0016772//transferase activity, transferring phosphorus-containing groups;GO:0046914//transition metal ion binding;GO:0098518//polynucleotide phosphatase activity	GO:0006260//DNA replication;GO:0010468//regulation of gene expression;GO:0016311//dephosphorylation;GO:0033554//cellular response to stress
Unigene0001207	2.54	0.023	0.36	0	0.6	0.02	1.363	0	--	-	-	-	-	-	-	-	-
Unigene0001208	0.77	0.46	0.247	0.803	1.5	0.477	0.963	1.017	--	U3 small nucleolar RNA-associated protein 20 [Salvia splendens]	-	-	-	-	-	-	-
Unigene0001209	1.393	0.583	0.613	1.217	2.967	0.46	1.347	1.31	utp20	U3 small nucleolar RNA-associated protein 20 [Salvia splendens]	-	-	-	-	-	-	-
Unigene0001210	0	2.623	0.39	0.03	0.187	0.733	0.223	0.693	AMBP	Serine protease inhibitor 2 [Chlorella sorokiniana]	-	-	-	-	-	-	-
Unigene0001211	2.663	0.523	0	0	0.433	0.493	0	0	--	-	-	-	-	-	-	-	-
Unigene0001212	0.363	3.55	1.557	0.283	0.78	1.173	0.393	1.347	Slc28a2	Sodium/nucleoside cotransporter [Emiliania huxleyi CCMP1516]	-	-	-	-	-	-	-
Unigene0001213	0	1.107	0	0	0	2.103	0	0	--	-	-	-	-	-	-	-	-
Unigene0001214	7.12	1.24	6.333	2.947	7.767	1.167	2.51	1.65	--	26S proteasome regulatory complex, subunit PSMD10 [Handroanthus impetiginosus]	-	-	-	-	-	-	-
Unigene0001215	0	0	2.85	0	0	0	0.023	0	--	-	-	-	-	-	-	-	-
Unigene0001216	0.697	0.627	1.24	0.63	0.6	0.513	0.2	0.467	GALT3	hydroxyproline O-galactosyltransferase GALT3 [Sesamum indicum]	-	-	-	-	GO:0031090//organelle membrane;GO:0031224//intrinsic component of membrane;GO:0043231//intracellular membrane-bounded organelle	GO:0005488//binding;GO:0035250//UDP-galactosyltransferase activity	GO:0006464//cellular protein modification process;GO:0033692//cellular polysaccharide biosynthetic process
Unigene0001217	90.063	25.623	46.627	55.707	56.037	29.06	61.807	34.883	RPL37C	60S ribosomal protein L37-3-like [Ipomoea triloba]	Genetic Information Processing	Translation	ko03010//Ribosome	K02922	GO:0015934//large ribosomal subunit;GO:0043231//intracellular membrane-bounded organelle	GO:0003723//RNA binding;GO:0005198//structural molecule activity;GO:0043169//cation binding;GO:0046983//protein dimerization activity	GO:0006006//glucose metabolic process;GO:0006886//intracellular protein transport;GO:0009451//RNA modification;GO:0010467//gene expression;GO:0022613//ribonucleoprotein complex biogenesis;GO:0034728//nucleosome organization
Unigene0001218	1.07	0.297	1.557	3.863	1.32	1.12	8.72	2.967	--	-	-	-	-	-	-	-	-
Unigene0001219	9.62	2.197	18.88	3.74	6.23	4.667	35.487	5.12	CYP71D55	cytochrome P450 [Salvia miltiorrhiza]	-	-	-	-	-	GO:0004497//monooxygenase activity;GO:0016705//oxidoreductase activity, acting on paired donors, with incorporation or reduction of molecular oxygen;GO:0046872//metal ion binding	-
Unigene0001220	0.373	0.72	0.327	0.527	0.257	0.12	0.217	0.227	--	-	-	-	-	-	-	-	-
Unigene0001221	0.23	5.2	1.113	0.033	0.36	1.117	0.303	0.627	--	-	-	-	-	-	-	-	-
Unigene0001222	104.543	74.837	29.783	69.85	180.963	34.22	42.933	77.347	CIPK6	CBL-interacting serine/threonine-protein kinase 6 [Sesamum indicum]	-	-	-	-	GO:0016020//membrane;GO:0043231//intracellular membrane-bounded organelle;GO:0044444//cytoplasmic part	GO:0004672//protein kinase activity;GO:0032550//purine ribonucleoside binding	GO:0006464//cellular protein modification process;GO:0006796//phosphate-containing compound metabolic process;GO:0006972//hyperosmotic response;GO:0009738//abscisic acid-activated signaling pathway;GO:0009926//auxin polar transport;GO:0019932//second-messenger-mediated signaling;GO:0044707//single-multicellular organism process
Unigene0001223	16.493	5.957	8.933	9.633	11.797	3.573	7.667	7.01	CTF7	N-acetyltransferase [Salvia splendens]	-	-	-	-	-	GO:0016740//transferase activity	GO:0006996//organelle organization;GO:0007059//chromosome segregation;GO:0007275//multicellular organism development;GO:0022402//cell cycle process
Unigene0001224	0.743	0	0.14	0.93	0.563	0	0.05	0.32	--	-	-	-	-	-	-	-	-
Unigene0001225	0	0	0	3.51	0	0	0	2.827	--	-	-	-	-	-	-	-	-
Unigene0001226	0.77	0.297	0.6	0.283	0.323	0.207	0.583	0.27	--	-	-	-	-	-	-	-	-
Unigene0001227	0	0.403	0	0.593	0	0.303	0	0.137	--	-	-	-	-	-	-	-	-
Unigene0001228	23.003	13.043	17.217	17.05	15.743	9.097	14.767	12.66	LIF2	heterogeneous nuclear ribonucleoprotein R-like [Sesamum indicum]	-	-	-	-	GO:0032991//macromolecular complex;GO:0044423//virion part;GO:0044444//cytoplasmic part	GO:0003676//nucleic acid binding	-
Unigene0001229	0.25	0.02	10.907	0	0.117	0.03	27.15	0.057	--	-	-	-	-	-	-	-	-
Unigene0001230	1.663	13.513	6.33	0.623	8.383	7.267	2.103	8.853	icl-1	malate synthase [Coccomyxa subellipsoidea C-169]	Metabolism;Metabolism;Metabolism;Metabolism;Metabolism	Global and overview maps;Global and overview maps;Global and overview maps;Carbohydrate metabolism;Carbohydrate metabolism	ko01100//Metabolic pathways;ko01110//Biosynthesis of secondary metabolites;ko01200//Carbon metabolism;ko00620//Pyruvate metabolism;ko00630//Glyoxylate and dicarboxylate metabolism	K01638;K01638;K01638;K01638;K01638	GO:0005777//peroxisome	GO:0016829//lyase activity;GO:0046912//transferase activity, transferring acyl groups, acyl groups converted into alkyl on transfer	GO:0019752//carboxylic acid metabolic process;GO:0044238//primary metabolic process
Unigene0001231	1.88	0.407	0.873	1.543	1.82	0.457	0.383	1.333	--	malectin/receptor-like protein kinase family protein [Striga asiatica]	-	-	-	-	-	-	-
Unigene0001232	2.91	0.213	0.16	0	1.443	0	0.21	0	--	hypothetical protein Saspl_038537 [Salvia splendens]	-	-	-	-	-	-	-
Unigene0001233	0	3.993	0.273	0.41	0	0	0	0	--	Regulator of rDNA transcription protein 15 [Capsicum baccatum]	-	-	-	-	-	-	-
Unigene0001234	0.077	2.303	1.58	0	0.01	1.097	3.573	0.01	--	-	-	-	-	-	-	-	-
Unigene0001235	3.943	1.49	3.857	4.087	3.677	2.303	4.073	4.093	--	-	-	-	-	-	-	-	-
Unigene0001236	0.737	0	0.39	0.653	1.907	0.11	1.203	0.533	FBL23	F-box and leucine-rich repeat protein 2/20 [Salvia splendens]	-	-	-	-	-	-	GO:0044267//cellular protein metabolic process
Unigene0001237	7.463	0.103	3.73	10.397	10.85	0.257	9.417	13.153	--	-	-	-	-	-	-	-	-
Unigene0001238	17.453	12.18	5.937	9.62	16.66	13.203	11.947	7.283	--	reverse transcriptase domain, Reverse transcriptase zinc-binding domain protein [Artemisia annua]	-	-	-	-	-	-	-
Unigene0001239	16.953	13.627	7.753	12.867	22.48	19.037	15.84	12.37	--	non-LTR retroelement reverse transcriptase-like protein [Striga asiatica]	-	-	-	-	-	-	-
Unigene0001240	33.213	3.66	4.393	22.9	15.757	6.457	6.703	12.737	--	Ribonuclease H protein [Actinidia chinensis var. chinensis] [Actinidia chinensis]	-	-	-	-	-	-	-
Unigene0001241	0.273	6.95	76.503	72.6	0.183	14.667	138.843	68.86	--	-	-	-	-	-	-	-	-
Unigene0001242	3.077	0	0	6	3.327	0	0	6.18	--	-	-	-	-	-	-	-	-
Unigene0001243	13.783	0.097	6.72	8.373	8.313	0.12	10.88	5.757	--	non-LTR retroelement reverse transcriptase-like protein [Striga asiatica]	-	-	-	-	-	-	-
Unigene0001244	0.833	0.033	2.713	1.613	1.923	0.08	7.747	1.03	--	-	-	-	-	-	-	-	-
Unigene0001245	0.883	0	0	1.203	0.773	0	0	0.963	--	-	-	-	-	-	-	-	-
Unigene0001246	0.073	0.517	0.217	0.13	0.02	1.123	0.157	0.02	--	-	-	-	-	-	-	-	-
Unigene0001247	0.207	0	0.247	0.757	0.283	0	0.123	0.39	--	Transposase, Tc1-like protein [Corchorus olitorius]	-	-	-	-	-	-	-
Unigene0001248	0.767	0	0.56	1.56	1.783	0	0.507	1.133	--	-	-	-	-	-	-	-	-
Unigene0001249	0.08	1.727	0.2	0.05	0.123	0.36	0.043	0.173	--	-	-	-	-	-	-	-	-
Unigene0001250	0.407	5.55	2.897	0.463	1.093	2.123	0.917	2.25	bckd-1A	branched chain keto acid dehydrogenase E1 [Capsaspora owczarzaki ATCC 30864]	Metabolism;Metabolism;Metabolism;Metabolism	Global and overview maps;Global and overview maps;Amino acid metabolism;Carbohydrate metabolism	ko01100//Metabolic pathways;ko01110//Biosynthesis of secondary metabolites;ko00280//Valine, leucine and isoleucine degradation;ko00640//Propanoate metabolism	K00166;K00166;K00166;K00166	GO:0043231//intracellular membrane-bounded organelle	GO:0016624//oxidoreductase activity, acting on the aldehyde or oxo group of donors, disulfide as acceptor	GO:0009267//cellular response to starvation;GO:0009642//response to light intensity;GO:0034285//response to disaccharide
Unigene0001252	2.157	1.443	0.157	0.08	0.523	0.19	0.143	0.043	--	U3 small nucleolar RNA-associated protein 3 [Salvia splendens]	-	-	-	-	GO:0032991//macromolecular complex;GO:0043231//intracellular membrane-bounded organelle	-	-
Unigene0001253	0.977	11.607	6.98	0.34	3.12	5.103	2.163	5.503	C16C10.3	protein argonaute 12 [Setaria italica]	-	-	-	-	GO:0044424//intracellular part	GO:0005488//binding	GO:0003002//regionalization;GO:0009653//anatomical structure morphogenesis;GO:0009791//post-embryonic development;GO:0009888//tissue development;GO:0016043//cellular component organization;GO:0016070//RNA metabolic process;GO:0030154//cell differentiation;GO:0034645//cellular macromolecule biosynthetic process;GO:0035194//posttranscriptional gene silencing by RNA;GO:0044702//single organism repro…
Unigene0001254	0.403	0.11	0	0.42	0.36	0.083	0.103	0.197	--	-	-	-	-	-	-	-	-
Unigene0001255	14.803	12.953	8.437	12.22	10.72	6.863	9.137	9.2	--	protein ALP1-like [Solanum pennellii]	-	-	-	-	-	-	-
Unigene0001256	0	0.517	0.17	0	0	1.063	0.2	0	--	-	-	-	-	-	-	-	-
Unigene0001257	21.157	18.553	18.203	19.51	21.727	15.31	21.75	18.973	RH42	ATP-dependent RNA helicase DDX46/PRP5 [Salvia splendens]	Genetic Information Processing	Transcription	ko03040//Spliceosome	K12811	GO:0043231//intracellular membrane-bounded organelle	GO:0003676//nucleic acid binding;GO:0032550//purine ribonucleoside binding;GO:0042623//ATPase activity, coupled	-
Unigene0001258	0.657	0	1.143	0.61	0.52	0.137	1.663	0.447	--	-	-	-	-	-	-	-	-
Unigene0001259	0.063	3.223	0.62	0.06	0.287	0.823	0.26	0.197	unc-22	fibronectin type-III domain-containing protein 3a isoform X1 [Selaginella moellendorffii]	-	-	-	-	-	-	-
Unigene0001260	0.3	0	0.79	0	0.26	0	0.563	0	--	-	-	-	-	-	-	-	-
Unigene0001261	0	0.26	1.553	0.013	0.037	0.543	4.1	0.103	--	transmembrane protein 60-like [Olea europaea var. sylvestris] [Olea europaea]	-	-	-	-	-	-	-
Unigene0001262	0.717	0.31	0.65	0.883	1.8	0.02	0.487	0.077	--	PREDICTED: LRR receptor-like serine/threonine-protein kinase FLS2 [Erythranthe guttata]	Organismal Systems;Environmental Information Processing	Environmental adaptation;Signal transduction	ko04626//Plant-pathogen interaction;ko04016//MAPK signaling pathway - plant	K13420;K13420	-	GO:0016740//transferase activity	-
Unigene0001263	0.267	9.323	3.747	0.203	1.19	2.09	1.287	1.807	--	-	-	-	-	-	-	-	-
Unigene0001264	0.5	0.633	0.823	1.033	1.787	0.3	1.12	0.43	--	PRLI-interacting factor A [Striga asiatica]	-	-	-	-	-	-	-
Unigene0001265	2.867	1.6	21.4	2.503	2.6	1.827	24	2.427	THO1	THO complex subunit 1 [Salvia splendens]	Genetic Information Processing;Genetic Information Processing	Transcription;Translation	ko03040//Spliceosome;ko03013//RNA transport	K12878;K12878	GO:0043231//intracellular membrane-bounded organelle;GO:0043234//protein complex	-	GO:0006405//RNA export from nucleus;GO:0009620//response to fungus;GO:0030422//production of siRNA involved in RNA interference
Unigene0001266	0.873	3.203	0	0.817	0.437	1.46	0	0.63	--	-	-	-	-	-	-	-	-
Unigene0001267	0.113	0.897	0.413	0	0.24	0.38	0.053	0.453	HASPIN	serine/threonine-protein kinase haspin homolog isoform X2 [Coffea eugenioides]	-	-	-	-	-	-	GO:0016570//histone modification;GO:0050789//regulation of biological process
Unigene0001268	0.18	3.387	1.56	0.097	0.68	1.347	0.41	1.117	HASPIN	serine/threonine-protein kinase haspin [Carex littledalei]	-	-	-	-	-	-	GO:0016570//histone modification;GO:0050789//regulation of biological process
Unigene0001269	36.74	32.78	33.27	32.757	28.617	20.48	37.243	26.323	HDA19	PREDICTED: histone deacetylase 19 [Erythranthe guttata]	-	-	-	-	GO:0043231//intracellular membrane-bounded organelle	GO:0005488//binding;GO:0017136//NAD-dependent histone deacetylase activity	GO:0006355//regulation of transcription, DNA-templated;GO:0007275//multicellular organism development;GO:0009292//genetic transfer;GO:0009611//response to wounding;GO:0016575//histone deacetylation
Unigene0001270	1.203	0.097	0.323	0.513	0.773	0.333	0.23	0.143	--	-	-	-	-	-	-	-	-
Unigene0001271	13.4	7.713	10.967	10.33	8.123	5.613	8.217	7.577	TPST	protein-tyrosine sulfotransferase isoform X1 [Sesamum indicum]	-	-	-	-	GO:0016020//membrane;GO:0043231//intracellular membrane-bounded organelle	GO:0005488//binding;GO:0016740//transferase activity	GO:0008152//metabolic process
Unigene0001272	0.477	0.213	0.357	4.823	0.227	0.103	0.35	2.95	FAO4B	long-chain-alcohol oxidase [Salvia splendens]	-	-	-	-	GO:0031224//intrinsic component of membrane;GO:0043227//membrane-bounded organelle	GO:0000166//nucleotide binding;GO:0016899//oxidoreductase activity, acting on the CH-OH group of donors, oxygen as acceptor	GO:0006950//response to stress;GO:0044281//small molecule metabolic process
Unigene0001273	54.84	22.403	19.257	6.897	22.083	3.413	30.11	8.243	At1g30760	berberine bridge enzyme-like 18 [Sesamum indicum]	-	-	-	-	-	GO:0016614//oxidoreductase activity, acting on CH-OH group of donors	-
Unigene0001274	0.863	10.927	7.253	0.4	2.543	5.03	1.65	5.07	--	-	-	-	-	-	-	-	-
Unigene0001275	2.95	5.203	7.997	5.07	2.723	11.087	0.12	6.187	--	-	-	-	-	-	-	-	-
Unigene0001276	0.76	8.563	3.187	0.19	1.857	3.33	0.843	2.91	K07C5.6	pre-mRNA-splicing factor SLU7-like [Cynara cardunculus var. scolymus] [Cynara cardunculus]	Genetic Information Processing	Transcription	ko03040//Spliceosome	K12819	-	-	-
Unigene0001277	3.96	2.503	4.847	4.03	2.913	1.863	3.2	2.623	ypgQ	Ribonuclease Y [Trema orientale]	-	-	-	-	-	GO:0042578//phosphoric ester hydrolase activity;GO:0043169//cation binding	-
Unigene0001279	9	6.653	7.727	7.137	6.36	4.38	7.193	6.4	EHD3	histone demethylase JARID1 [Salvia splendens]	-	-	-	-	-	-	-
Unigene0001280	1.723	0.147	0.273	0.763	1.11	0.193	0.873	1.407	At1g65240	eukaryotic aspartyl protease family protein [Striga asiatica]	-	-	-	-	GO:0005623//cell;GO:0005911//cell-cell junction;GO:0031224//intrinsic component of membrane	GO:0016787//hydrolase activity	GO:0000160//phosphorelay signal transduction system;GO:0000302//response to reactive oxygen species;GO:0006281//DNA repair;GO:0006498//N-terminal protein lipidation;GO:0006625//protein targeting to peroxisome;GO:0009062//fatty acid catabolic process;GO:0009648//photoperiodism;GO:0016265//death;GO:0019941//modification-dependent protein catabolic process;GO:0030001//metal ion transport;GO:0048193/…
Unigene0001282	0.387	0.933	0.377	0.817	0.897	0.537	0.833	0.84	--	-	-	-	-	-	-	-	-
Unigene0001283	5.177	0.147	4.953	1.82	2.607	0.123	0.383	0.89	--	PREDICTED: plant/MNJ7-17 [Prunus dulcis]	-	-	-	-	-	-	GO:0009408//response to heat
Unigene0001284	0.833	9.073	5.4	0.267	1.883	4.127	1.45	4.23	Cdc5l	Cell division cycle 5-like protein [Glycine soja]	Genetic Information Processing	Transcription	ko03040//Spliceosome	K12860	GO:0009536//plastid	GO:0005488//binding	GO:0002218//activation of innate immune response;GO:0009617//response to bacterium;GO:0009620//response to fungus;GO:0010467//gene expression;GO:0016070//RNA metabolic process;GO:0044763//single-organism cellular process
Unigene0001285	0	0.827	1.43	0.047	0	0.6	0.807	0	--	tyrosine/DOPA decarboxylase [Spatholobus suberectus]	-	-	-	-	-	-	-
Unigene0001286	3.177	1.11	2.89	3.083	2.76	1.463	2.307	2.597	HY2	phytochromobilin:ferredoxin oxidoreductase, chloroplastic isoform X2 [Sesamum indicum]	Metabolism;Metabolism	Global and overview maps;Metabolism of cofactors and vitamins	ko01110//Biosynthesis of secondary metabolites;ko00860//Porphyrin and chlorophyll metabolism	K08101;K08101	GO:0009536//plastid	GO:0016636//oxidoreductase activity, acting on the CH-CH group of donors, iron-sulfur protein as acceptor;GO:0046914//transition metal ion binding	GO:0007165//signal transduction;GO:0033014//tetrapyrrole biosynthetic process;GO:0044710//single-organism metabolic process
Unigene0001287	14.36	6.743	18.7	15.633	8.8	9.307	14.73	8.753	CDKF-1	cyclin-dependent kinase 7 [Salvia splendens]	-	-	-	-	GO:0016020//membrane;GO:0043231//intracellular membrane-bounded organelle;GO:0055028//cortical microtubule	GO:0004674//protein serine/threonine kinase activity;GO:0036094//small molecule binding;GO:0097159//organic cyclic compound binding;GO:1901363//heterocyclic compound binding	GO:0000079//regulation of cyclin-dependent protein serine/threonine kinase activity;GO:0003006//developmental process involved in reproduction;GO:0007126//meiotic nuclear division;GO:0009409//response to cold;GO:0009791//post-embryonic development;GO:0009888//tissue development;GO:0042127//regulation of cell proliferation;GO:0044786//cell cycle DNA replication;GO:0048229//gametophyte development;…
Unigene0001288	0.86	0.22	0.273	1.013	1.953	0.267	0.153	0.95	--	gag protease polyprotein [Cucumis melo var. makuwa] [Cucumis melo]	-	-	-	-	-	-	-
Unigene0001290	0.553	7.707	3.12	0.187	1.75	3.263	0.807	3.35	sos-1	guanine nucleotide exchange factor [Capsaspora owczarzaki ATCC 30864]	-	-	-	-	-	-	-
Unigene0001291	1.33	0	0.2	0.127	0.04	0.037	1.267	0.043	--	PREDICTED: transcription factor bHLH113-like isoform X2 [Gossypium hirsutum]	-	-	-	-	-	-	-
Unigene0001292	0	0.777	1.43	1.747	0	1.107	2.27	1.6	ASD1	Non-reducing end alpha-L-arabinofuranosidase [Handroanthus impetiginosus]	Metabolism;Metabolism	Global and overview maps;Carbohydrate metabolism	ko01100//Metabolic pathways;ko00520//Amino sugar and nucleotide sugar metabolism	K01209;K01209	-	GO:0016798//hydrolase activity, acting on glycosyl bonds	-
Unigene0001293	3.593	0	0	4.793	6.747	0	0	4.77	--	-	-	-	-	-	-	-	-
Unigene0001294	0.31	6.677	2.613	0.123	1.207	2.25	0.723	2.26	DHX34	DEAH box polypeptide 34 [Capsaspora owczarzaki ATCC 30864]	-	-	-	-	GO:0044424//intracellular part	GO:0016787//hydrolase activity;GO:0097159//organic cyclic compound binding;GO:1901363//heterocyclic compound binding	GO:0006396//RNA processing;GO:0035194//posttranscriptional gene silencing by RNA;GO:0043412//macromolecule modification;GO:0044710//single-organism metabolic process;GO:0050896//response to stimulus
Unigene0001295	0.087	2.447	2.223	0.083	0.567	1.26	0.323	1.437	--	ascorbate transporter, chloroplastic-like [Papaver somniferum]	-	-	-	-	-	-	-
Unigene0001296	26.493	1.917	12.02	0.547	11.013	2.297	19.35	6.683	DIR15	PREDICTED: dirigent protein 22-like [Nicotiana tomentosiformis]	-	-	-	-	-	-	-
Unigene0001297	4.917	3.313	3.197	2.9	5.497	4.133	6.677	2.297	--	-	-	-	-	-	-	-	-
Unigene0001298	1.723	0.843	1.463	1.36	5.62	3.02	2.107	3.607	--	-	-	-	-	-	-	-	-
Unigene0001299	0	0	4.55	0	0	0	0	0	--	-	-	-	-	-	-	-	-
Unigene0001300	5.213	2.813	20.347	0	0.65	0.887	23.833	0.027	--	probable xyloglucan endotransglucosylase/hydrolase protein 16 [Solanum lycopersicum]	-	-	-	-	GO:0005576//extracellular region;GO:0030312//external encapsulating structure	GO:0016758//transferase activity, transferring hexosyl groups;GO:0016787//hydrolase activity	GO:0044042//glucan metabolic process;GO:0045229//external encapsulating structure organization
Unigene0001301	13.847	3.53	8.13	11.07	15.807	6.953	11.427	11.43	SDE3	helicase MOV-10 [Salvia splendens]	-	-	-	-	GO:0044424//intracellular part	GO:0004386//helicase activity;GO:0097159//organic cyclic compound binding;GO:1901363//heterocyclic compound binding	GO:0016441//posttranscriptional gene silencing;GO:0045087//innate immune response
Unigene0001302	0.027	0.683	0.48	0.073	0.147	0.97	1.327	0	RPL23	pentatricopeptide repeat protein [Salvia miltiorrhiza]	Genetic Information Processing	Translation	ko03010//Ribosome	K02894	GO:0009536//plastid;GO:0015934//large ribosomal subunit	GO:0003723//RNA binding;GO:0005198//structural molecule activity	GO:0009451//RNA modification;GO:0010467//gene expression
Unigene0001303	0.867	0.317	0.953	0.643	0.777	0.17	0.467	0.497	ACPD	Fatty acid desaturase, type 2 [Cynara cardunculus var. scolymus] [Cynara cardunculus]	Metabolism;Metabolism;Metabolism;Metabolism	Global and overview maps;Global and overview maps;Lipid metabolism;Lipid metabolism	ko01100//Metabolic pathways;ko01212//Fatty acid metabolism;ko00061//Fatty acid biosynthesis;ko01040//Biosynthesis of unsaturated fatty acids	K03921;K03921;K03921;K03921	GO:0009532//plastid stroma;GO:0031976//plastid thylakoid	GO:0016215//acyl-CoA desaturase activity	GO:0000226//microtubule cytoskeleton organization;GO:0002252//immune effector process;GO:0006090//pyruvate metabolic process;GO:0006544//glycine metabolic process;GO:0006633//fatty acid biosynthetic process;GO:0006732//coenzyme metabolic process;GO:0006753//nucleoside phosphate metabolic process;GO:0006779//porphyrin-containing compound biosynthetic process;GO:0006790//sulfur compound metabolic p…
Unigene0001305	0.59	5.59	6.963	0.777	3.26	5.98	2.493	10.873	--	probable chitinase 2 [Rhodamnia argentea]	-	-	-	-	-	-	-
Unigene0001306	11.147	12.16	0.71	0.167	1.71	0.043	0.167	0.017	--	26S proteasome regulatory complex, subunit PSMD10 [Handroanthus impetiginosus]	-	-	-	-	-	-	-
Unigene0001307	7.453	14.493	5.817	7.903	3.683	0.91	6.367	2.13	GALUR	Aldo/keto reductase family protein [Handroanthus impetiginosus]	-	-	-	-	-	-	-
Unigene0001308	1.207	0.413	1.15	1.537	5.107	0.36	1.09	1.347	frr	PREDICTED: ribosome-recycling factor, chloroplastic [Nicotiana sylvestris]	-	-	-	-	GO:0009536//plastid	-	GO:0008299//isoprenoid biosynthetic process;GO:0009657//plastid organization;GO:0010467//gene expression;GO:0044283//small molecule biosynthetic process
Unigene0001309	0	0.207	0.163	0.263	0	0.197	0.637	1.073	--	cyclin [Striga asiatica]	-	-	-	-	GO:0043231//intracellular membrane-bounded organelle	GO:0019900//kinase binding	GO:0051726//regulation of cell cycle
Unigene0001310	0	1.59	1.403	0	0	2.433	4.897	0	BIP5	luminal-binding protein 5-like [Coffea arabica]	Genetic Information Processing;Genetic Information Processing	Folding, sorting and degradation;Folding, sorting and degradation	ko04141//Protein processing in endoplasmic reticulum;ko03060//Protein export	K09490;K09490	GO:0005911//cell-cell junction;GO:0009536//plastid;GO:0030312//external encapsulating structure;GO:0031090//organelle membrane;GO:0043232//intracellular non-membrane-bounded organelle;GO:0043234//protein complex;GO:0044432//endoplasmic reticulum part	GO:0016628//oxidoreductase activity, acting on the CH-CH group of donors, NAD or NADP as acceptor;GO:0032550//purine ribonucleoside binding	GO:0000302//response to reactive oxygen species;GO:0000741//karyogamy;GO:0009642//response to light intensity;GO:0009725//response to hormone;GO:0010038//response to metal ion;GO:0010468//regulation of gene expression;GO:0022613//ribonucleoprotein complex biogenesis;GO:0033554//cellular response to stress;GO:0034645//cellular macromolecule biosynthetic process;GO:0043161//proteasome-mediated ubiq…
Unigene0001311	2.39	0.023	0.34	1.19	2.513	0.113	0.023	0.863	--	-	-	-	-	-	-	-	-
Unigene0001312	0	0	0	2.933	0	0	0	2.883	--	-	-	-	-	-	-	-	-
Unigene0001313	1.217	4.26	16.45	0.197	2.93	8.493	0.207	6.023	--	-	-	-	-	-	-	-	-
Unigene0001314	116.067	46.69	119.297	103.073	99.473	59.643	161.277	93.78	--	transducin/WD40 repeat-like superfamily protein [Striga asiatica]	-	-	-	-	-	-	-
Unigene0001315	1.833	0.173	0	3.96	3.227	0.78	0.163	2.24	--	-	-	-	-	-	-	-	-
Unigene0001316	4.56	0.037	3.87	0.417	3.003	1.66	2.61	0.81	--	pentatricopeptide repeat protein [Salvia miltiorrhiza]	-	-	-	-	-	-	-
Unigene0001317	1.67	0	0.253	0	1.587	0.153	0.19	0	--	pentatricopeptide repeat protein [Salvia miltiorrhiza]	-	-	-	-	-	-	-
Unigene0001318	1.013	0	2.473	0.327	0.987	0.04	0.797	0.253	--	disease resistance protein RPS2 [Salvia splendens]	Organismal Systems	Environmental adaptation	ko04626//Plant-pathogen interaction	K13459	-	-	-
Unigene0001319	1.803	0.307	1.45	1.443	0.777	0.12	0.9	0.567	--	-	-	-	-	-	-	-	-
Unigene0001320	16.71	0	0	0.033	4.38	0	0.057	0	--	-	-	-	-	-	-	-	-
Unigene0001321	4.523	0.863	4.907	0.033	4.04	0.98	2.387	0	--	hypothetical protein Saspl_050949 [Salvia splendens]	-	-	-	-	-	-	-
Unigene0001322	20.73	12.81	16.653	13.98	10.813	8.14	15.56	9.147	VTI13	vesicle transport through interaction with t-SNAREs 1 [Salvia splendens]	Genetic Information Processing	Folding, sorting and degradation	ko04130//SNARE interactions in vesicular transport	K08493	-	-	-
Unigene0001323	0.187	0.213	0.66	0.117	0	0.16	0.067	0.127	--	-	-	-	-	-	-	-	-
Unigene0001324	2.277	27.553	44.103	1.843	7.15	13.43	4.59	25.993	--	-	-	-	-	-	-	-	-
Unigene0001325	1.37	0.287	0.22	0	0.12	0.507	1.047	0	--	-	-	-	-	-	-	-	-
Unigene0001326	6.37	2.107	6.19	2.813	2.413	2.457	3.697	1.19	--	Signal peptide, CUB and EGF-like domain-containing protein [Actinidia chinensis var. chinensis] [Actinidia chinensis]	-	-	-	-	GO:0009536//plastid;GO:0031224//intrinsic component of membrane	-	GO:0015031//protein transport
Unigene0001327	1.583	0.03	0.407	1.243	2.103	0.267	0.263	1.403	At1g49610	F-box/LRR-repeat protein 25-like isoform X2 [Olea europaea var. sylvestris] [Olea europaea]	-	-	-	-	-	-	-
Unigene0001328	0.193	6.177	1.567	0.107	0.903	1.497	0.657	1.36	mua-3	protein tyrosine kinase, partial [Ministeria vibrans]	-	-	-	-	-	-	-
Unigene0001329	0.307	1.44	0.527	0.117	0.723	0.733	0.093	0.747	--	-	-	-	-	-	-	-	-
Unigene0001330	0.167	0.463	3.3	0.107	0.04	0.41	1.61	0.033	--	-	-	-	-	-	-	-	-
Unigene0001331	0.07	0.66	0.35	0.04	0.317	0.193	0.27	0.167	--	-	-	-	-	-	-	-	-
Unigene0001333	0.293	3.97	2.053	0.093	0.66	1.513	0.393	1.28	KAT6B	MYST histone acetyltransferase 2 [Capsaspora owczarzaki ATCC 30864]	-	-	-	-	GO:0043231//intracellular membrane-bounded organelle	GO:0090595//acetyl-CoA:L-lysine N6-acetyltransferase	GO:0000226//microtubule cytoskeleton organization;GO:0000904//cell morphogenesis involved in differentiation;GO:0006259//DNA metabolic process;GO:0009411//response to UV;GO:0010074//maintenance of meristem identity;GO:0010468//regulation of gene expression;GO:0042127//regulation of cell proliferation;GO:0044710//single-organism metabolic process
Unigene0001334	0	6.203	3.923	0.013	0.01	0	7.047	0	LAC14	laccase 45 [Salvia miltiorrhiza]	-	-	-	-	-	GO:0005488//binding	-
Unigene0001335	13.24	7.577	11.863	13.32	10.417	7.907	13.203	11.873	GLCAT14A	beta-glucuronosyltransferase GlcAT14A-like isoform X1 [Olea europaea var. sylvestris] [Olea europaea]	-	-	-	-	GO:0043231//intracellular membrane-bounded organelle	GO:0035252//UDP-xylosyltransferase activity	GO:0044711//single-organism biosynthetic process
Unigene0001336	3.93	1.827	10.45	5.387	3.64	1.71	9.093	2.707	GSTU8	glutathione S-transferase [Salvia splendens]	Metabolism;Metabolism	Global and overview maps;Metabolism of other amino acids	ko01100//Metabolic pathways;ko00480//Glutathione metabolism	K00799;K00799	GO:0005737//cytoplasm	GO:0016765//transferase activity, transferring alkyl or aryl (other than methyl) groups	GO:0006511//ubiquitin-dependent protein catabolic process;GO:0009062//fatty acid catabolic process;GO:0009404//toxin metabolic process;GO:0010038//response to metal ion;GO:0014070//response to organic cyclic compound;GO:0035966//response to topologically incorrect protein;GO:0043248//proteasome assembly
Unigene0001337	0	4.263	12.09	0.02	0.01	7.797	28.417	0.027	--	Activating signal cointegrator 1 complex subunit like [Actinidia chinensis var. chinensis] [Actinidia chinensis]	-	-	-	-	GO:0009536//plastid;GO:0031984//organelle subcompartment	-	GO:0035556//intracellular signal transduction;GO:0045087//innate immune response;GO:0048588//developmental cell growth
Unigene0001338	0.53	0.88	1.013	0	0.433	0.507	1.697	0	R1B-12	Apoptotic ATPase [Handroanthus impetiginosus]	-	-	-	-	-	-	-
Unigene0001339	3.88	4.613	2.47	5.95	2.77	1.977	2.273	2.93	7DLGT	cytokinin-N-glucosyltransferase [Salvia splendens]	-	-	-	-	-	GO:0035251//UDP-glucosyltransferase activity	GO:0016099//monoterpenoid biosynthetic process
Unigene0001340	14.273	55.357	14.38	19.61	12.707	26.42	12.083	10.703	7DLGT	cytokinin-N-glucosyltransferase [Salvia splendens]	-	-	-	-	-	GO:0008194//UDP-glycosyltransferase activity	GO:0016099//monoterpenoid biosynthetic process
Unigene0001341	6.32	1.85	4.263	4.933	4.257	1.57	3.97	3.29	BOU	solute carrier family 25 (mitochondrial carnitine/acylcarnitine transporter), member 20/29 [Salvia splendens]	-	-	-	-	GO:0009536//plastid;GO:0019866//organelle inner membrane;GO:0031224//intrinsic component of membrane	-	GO:0006812//cation transport;GO:1902582//single-organism intracellular transport
Unigene0001342	0.63	1.473	0.59	0.427	0.43	0.247	0	0.167	--	-	-	-	-	-	-	-	-
Unigene0001343	0.77	0.48	0	1.017	1.96	0.263	0	0.94	--	-	-	-	-	-	-	-	-
Unigene0001344	0.6	3.12	4.103	0.09	1.043	1.69	0.467	2.587	--	-	-	-	-	-	-	-	-
Unigene0001346	0.037	0.143	0.357	0.647	0	0.483	0.59	0.497	--	-	-	-	-	-	-	-	-
Unigene0001347	0.973	0.313	2.693	0.773	0.66	0.33	6.033	0.457	--	MBOAT domain-containing protein/gag_pre-integrs domain-containing protein, partial [Cephalotus follicularis]	-	-	-	-	GO:0016020//membrane	GO:0016740//transferase activity	GO:0006810//transport
Unigene0001348	0.913	0.197	0.133	0.11	0.11	0	0.7	0.243	--	-	-	-	-	-	-	-	-
Unigene0001349	7.293	0.137	3.913	1.983	3.543	5.563	4.467	14.577	--	Agglutinin [Gossypium australe]	-	-	-	-	-	-	-
Unigene0001351	0.813	0.467	0.72	0.643	0.647	0.33	0.91	0.453	--	-	-	-	-	-	-	-	-
Unigene0001352	9.077	3.117	0	0.047	4.927	2.81	0	0	--	-	-	-	-	-	-	-	-
Unigene0001353	0.447	0.183	2.19	0.39	0.787	0.187	2.523	0.337	--	-	-	-	-	-	-	-	-
Unigene0001354	0.18	14.043	1.613	0.183	1.267	2.64	1.103	1.953	--	-	-	-	-	-	-	-	-
Unigene0001355	1.14	0.297	0	0	0.45	0.413	0	0	--	-	-	-	-	-	-	-	-
Unigene0001356	0.093	0.76	0.083	0	0.123	0.063	0.133	0	--	PREDICTED: disease resistance protein RPP13-like [Erythranthe guttata]	-	-	-	-	-	-	-
Unigene0001357	0	0.98	0.24	0	0	0.57	0.19	0	SCM1	transcription factor [Dorcoceras hygrometricum]	-	-	-	-	GO:0043231//intracellular membrane-bounded organelle	GO:0001071//nucleic acid binding transcription factor activity;GO:0003676//nucleic acid binding;GO:0005515//protein binding;GO:0016628//oxidoreductase activity, acting on the CH-CH group of donors, NAD or NADP as acceptor	GO:0009718//anthocyanin-containing compound biosynthetic process;GO:0009909//regulation of flower development;GO:0010074//maintenance of meristem identity;GO:0010468//regulation of gene expression;GO:0034645//cellular macromolecule biosynthetic process
Unigene0001359	1.067	0.257	0.667	0.873	1.127	0.623	0.713	0.93	--	-	-	-	-	-	-	-	-
Unigene0001360	0.357	0.813	0.373	0.17	0.193	0.683	0.11	0.11	--	-	-	-	-	-	-	-	-
Unigene0001361	0	3.777	0	0	0	0.477	0	0	--	-	-	-	-	-	-	-	-
Unigene0001362	8.373	4.41	6.63	8.213	8.02	3.863	6.66	8.75	R1A-10	disease resistance RPP8-like protein 3 isoform X2 [Olea europaea var. sylvestris] [Olea europaea]	-	-	-	-	-	-	-
Unigene0001363	65.297	29.483	35.467	64.94	58.393	24.223	33.273	52.413	RPN6	26S proteasome regulatory subunit N6 [Salvia splendens]	Genetic Information Processing	Folding, sorting and degradation	ko03050//Proteasome	K03036	GO:0044424//intracellular part	-	GO:0006511//ubiquitin-dependent protein catabolic process;GO:0006950//response to stress;GO:0009628//response to abiotic stimulus;GO:0042221//response to chemical;GO:0043248//proteasome assembly;GO:0044763//single-organism cellular process
Unigene0001364	7.01	1.197	3.5	1.69	4.647	2.943	2.56	1.837	CCR1	bifunctional dihydroflavonol 4-reductase/flavanone 4-reductase [Salvia splendens]	-	-	-	-	GO:0016020//membrane;GO:0044444//cytoplasmic part	GO:0016616//oxidoreductase activity, acting on the CH-OH group of donors, NAD or NADP as acceptor;GO:0016620//oxidoreductase activity, acting on the aldehyde or oxo group of donors, NAD or NADP as acceptor;GO:0048037//cofactor binding	GO:0009699//phenylpropanoid biosynthetic process;GO:0019758//glycosinolate biosynthetic process
Unigene0001365	0	0.327	0.93	0	0	0.207	1.09	0	--	-	-	-	-	-	-	-	-
Unigene0001366	0	0.043	1.707	0	0	0	0	0.04	--	-	-	-	-	-	-	-	-
Unigene0001367	3.117	0.837	7.637	1.287	17.617	0.167	0.99	4.447	--	-	-	-	-	-	-	-	-
Unigene0001368	0.373	0	0.15	0.64	0.757	0.463	0.89	0.17	--	-	-	-	-	-	-	-	-
Unigene0001369	0.35	0	0	0.147	0	0	0	0.07	--	-	-	-	-	-	-	-	-
Unigene0001370	0.263	6.19	3.647	0.193	0.85	2.21	1.103	2.073	rig-6	contactin-like [Rhodamnia argentea]	-	-	-	-	-	-	-
Unigene0001372	2.46	1.443	3.497	1.627	4.647	0.8	1.913	0.733	CYP71AU50	cytochrome P450 CYP736A122 [Salvia miltiorrhiza]	-	-	-	-	-	GO:0016705//oxidoreductase activity, acting on paired donors, with incorporation or reduction of molecular oxygen;GO:0046872//metal ion binding	-
Unigene0001373	0.21	0.07	0.81	0.35	0.317	0	0.417	0.267	--	-	-	-	-	-	-	-	-
Unigene0001374	0.06	1.253	1.663	0.123	0.213	0.58	0.433	0.83	SLC2A2	glucose transporter type 1-like [Rhodamnia argentea]	-	-	-	-	GO:0009526//plastid envelope;GO:0016020//membrane	-	GO:0006810//transport;GO:0044699//single-organism process
Unigene0001375	0	4.32	0.02	0	0	3.22	0.033	0	--	-	-	-	-	-	-	-	-
Unigene0001376	1.797	1.747	8.393	4.513	3.84	0.877	0.57	2.403	--	-	-	-	-	-	-	-	-
Unigene0001377	0.037	0.067	71.423	0.033	0	0.147	472.56	0.527	--	Natterin-3 like [Actinidia chinensis var. chinensis] [Actinidia chinensis]	-	-	-	-	-	-	-
Unigene0001378	0	0.973	0.973	1.37	0	1.79	0.507	2.12	--	-	-	-	-	-	-	-	-
Unigene0001379	0.857	0.213	0.643	0.807	0.647	0.307	0.583	0.477	--	-	-	-	-	-	-	-	-
Unigene0001380	0.213	0	0	1.577	0.123	0.037	0.09	2.07	RPP13	NBS-LRR class resistance protein Fy12-Ry12, partial [Sesamum indicum]	-	-	-	-	-	-	-
Unigene0001381	18.12	8.83	15.963	19.313	14.633	9.42	16.717	15.317	At3g02650	pentatricopeptide repeat protein [Salvia miltiorrhiza]	-	-	-	-	GO:0043231//intracellular membrane-bounded organelle	-	-
Unigene0001382	5.89	1.773	6.61	5.977	5.957	3.227	7.143	5.057	ABCB26	PREDICTED: ABC transporter B family member 26, chloroplastic-like isoform X1 [Erythranthe guttata]	Environmental Information Processing	Membrane transport	ko02010//ABC transporters	K05656	GO:0009526//plastid envelope;GO:0016020//membrane	GO:0042626//ATPase activity, coupled to transmembrane movement of substances	GO:0008152//metabolic process;GO:0042221//response to chemical;GO:0044763//single-organism cellular process;GO:0044765//single-organism transport
Unigene0001383	14.813	5.57	11.98	13.113	16.09	8.967	15.97	11.393	PGIC2-A	glucose-6-phosphate isomerase [Salvia splendens]	Metabolism;Metabolism;Metabolism;Metabolism;Metabolism;Metabolism;Metabolism	Global and overview maps;Global and overview maps;Global and overview maps;Carbohydrate metabolism;Carbohydrate metabolism;Carbohydrate metabolism;Carbohydrate metabolism	ko01100//Metabolic pathways;ko01110//Biosynthesis of secondary metabolites;ko01200//Carbon metabolism;ko00010//Glycolysis / Gluconeogenesis;ko00520//Amino sugar and nucleotide sugar metabolism;ko00500//Starch and sucrose metabolism;ko00030//Pentose phosphate pathway	K01810;K01810;K01810;K01810;K01810;K01810;K01810	GO:0009526//plastid envelope;GO:0009532//plastid stroma	GO:0016861//intramolecular oxidoreductase activity, interconverting aldoses and ketoses	GO:0005982//starch metabolic process;GO:0006006//glucose metabolic process;GO:0006090//pyruvate metabolic process;GO:0009411//response to UV;GO:0009812//flavonoid metabolic process;GO:0009893//positive regulation of metabolic process;GO:0009909//regulation of flower development;GO:0034285//response to disaccharide;GO:0050832//defense response to fungus;GO:0071555//cell wall organization
Unigene0001384	2.83	3.497	3.727	2.12	1.98	2.177	3.7	1.333	--	PREDICTED: MLO [Prunus dulcis]	-	-	-	-	-	-	-
Unigene0001385	21.647	10.3	22.623	17.567	15.093	11.77	20.737	15.313	RSZ21A	serine/arginine-rich splicing factor RSZ22A-like isoform X1 [Olea europaea var. sylvestris] [Olea europaea]	Genetic Information Processing	Transcription	ko03040//Spliceosome	K12896	GO:0005634//nucleus	GO:0046914//transition metal ion binding;GO:0097159//organic cyclic compound binding	GO:0006355//regulation of transcription, DNA-templated;GO:0008380//RNA splicing;GO:0070918//production of small RNA involved in gene silencing by RNA
Unigene0001386	0.157	0.06	0.707	0	0.107	0	0.843	0.167	--	-	-	-	-	-	-	-	-
Unigene0001387	1.4	1.157	1.017	0.963	1.943	0.703	1.493	0.997	SRS5	PREDICTED: protein SHI RELATED SEQUENCE 5-like [Erythranthe guttata]	-	-	-	-	-	GO:0046983//protein dimerization activity	GO:0009937//regulation of gibberellic acid mediated signaling pathway
Unigene0001388	0	0.413	0.777	0	0	0	0.23	0.11	--	-	-	-	-	-	-	-	-
Unigene0001389	0	1.29	0	0	0	1.093	0	0	--	-	-	-	-	-	-	-	-
Unigene0001390	0.797	7.19	4.19	0.31	1.883	3.193	1.573	4.06	NID1	low-density lipoprotein receptor-related protein 2-like [Rhodamnia argentea]	-	-	-	-	-	-	-
Unigene0001391	5.59	19.513	18436.2	8.793	3914.04	14.98	28868.8	34.667	ORF1	-	-	-	-	-	-	-	-
Unigene0001393	4.047	62.367	83.147	3.707	20.01	33.72	12.393	64.66	--	-	-	-	-	-	-	-	-
Unigene0001394	0.053	0.38	3.387	0.037	0.02	0.36	7.11	0.04	--	-	-	-	-	-	-	-	-
Unigene0001395	1.87	0.61	2.793	1.463	1.04	0.44	1.217	0.81	--	putative bystin [Helianthus annuus]	-	-	-	-	-	-	-
Unigene0001396	4.633	2.86	2.977	3.603	4.193	1.803	2.62	2.323	PCRK2	PREDICTED: probable receptor-like protein kinase At5g47070 [Erythranthe guttata]	-	-	-	-	-	GO:0016301//kinase activity	GO:0006464//cellular protein modification process;GO:0006811//ion transport;GO:0016310//phosphorylation;GO:0050896//response to stimulus
Unigene0001397	0	2.003	0	0	0	1.713	0	0	RPL22B	large subunit ribosomal protein L22e [Salvia splendens]	Genetic Information Processing	Translation	ko03010//Ribosome	K02891	GO:0009536//plastid;GO:0015934//large ribosomal subunit;GO:0016020//membrane	-	GO:0009451//RNA modification;GO:0010467//gene expression
Unigene0001398	10.277	0.97	2.483	0	4.25	0.593	3.877	0	--	-	-	-	-	-	-	-	-
Unigene0001399	0.373	5.387	3.127	0.18	1.047	2.093	0.677	1.887	Polg	DNA polymerase subunit gamma-1-like [Rhodamnia argentea]	-	-	-	-	-	-	-
Unigene0001400	0.847	13.127	4.983	0.4	1.84	3.59	1.217	4.197	RANBP10	SPla/RYanodine receptor (SPRY) domain-containing protein [Galdieria sulphuraria]	-	-	-	-	-	-	-
Unigene0001401	1.19	1.39	1.653	0.147	0.143	1.057	3.37	0.27	NIK2	probable LRR receptor-like serine/threonine-protein kinase At2g23950 [Setaria italica]	-	-	-	-	GO:0031224//intrinsic component of membrane	GO:0004672//protein kinase activity;GO:0016628//oxidoreductase activity, acting on the CH-CH group of donors, NAD or NADP as acceptor;GO:0032550//purine ribonucleoside binding	GO:0002252//immune effector process;GO:0005976//polysaccharide metabolic process;GO:0006464//cellular protein modification process;GO:0006796//phosphate-containing compound metabolic process;GO:0006950//response to stress;GO:0009755//hormone-mediated signaling pathway;GO:0009826//unidimensional cell growth;GO:0016032//viral process;GO:0043479//pigment accumulation in tissues in response to UV lig…
Unigene0001402	1.487	0.243	1.557	1.883	2.12	0.38	1.233	1.36	--	Retrovirus-related Pol polyprotein from transposon TNT 1-94 [Vitis vinifera]	-	-	-	-	-	-	-
Unigene0001403	0.38	4.467	2.47	0.16	1.003	1.677	0.43	2.023	dis-3	exosome complex exonuclease RRP44 [Sphaeroforma arctica JP610]	Genetic Information Processing	Folding, sorting and degradation	ko03018//RNA degradation	K12585	-	GO:0004518//nuclease activity	GO:0016070//RNA metabolic process
Unigene0001404	0	0	2.393	0.203	0	0	5.06	0.183	--	-	-	-	-	-	-	-	-
Unigene0001405	0	0	0	2.577	0	0	0	2.497	--	F-box/kelch-repeat protein At3g23880-like [Sesamum indicum]	-	-	-	-	-	-	-
Unigene0001406	62.687	9.453	53.793	30.633	85.577	10.98	28.28	38.427	XXT1	histone-arginine methyltransferase CARM1 [Salvia splendens]	-	-	-	-	GO:0031224//intrinsic component of membrane;GO:0031984//organelle subcompartment;GO:0043231//intracellular membrane-bounded organelle	GO:0005488//binding;GO:0008194//UDP-glycosyltransferase activity;GO:0042285//xylosyltransferase activity	GO:0006464//cellular protein modification process;GO:0009250//glucan biosynthetic process;GO:0009826//unidimensional cell growth;GO:0010243//response to organonitrogen compound;GO:0019758//glycosinolate biosynthetic process;GO:0043479//pigment accumulation in tissues in response to UV light;GO:0045229//external encapsulating structure organization;GO:0048588//developmental cell growth;GO:0065008/…
Unigene0001407	12.873	7.283	15.487	9.857	15.223	11.217	14.343	7.693	--	Lipoyl synthase [Actinidia chinensis var. chinensis] [Actinidia chinensis]	-	-	-	-	-	-	-
Unigene0001408	2.447	1.683	4.173	1.35	1.077	1.49	4.603	0.49	PMI2	protein PLASTID MOVEMENT IMPAIRED 2 isoform X2 [Sesamum indicum]	-	-	-	-	-	-	-
Unigene0001409	9.943	4.36	8.173	7.69	8.57	2.917	6.29	6.197	--	Zinc-binding ribosomal protein family protein [Hibiscus syriacus]	-	-	-	-	-	-	-
Unigene0001410	0.4	10.283	2.67	0.307	0.94	2.397	0.597	1.98	egl-8	1-phosphatidylinositol 4,5-bisphosphate phosphodiesterase classes I and II-like [Rhodamnia argentea]	Metabolism;Environmental Information Processing;Metabolism	Global and overview maps;Signal transduction;Carbohydrate metabolism	ko01100//Metabolic pathways;ko04070//Phosphatidylinositol signaling system;ko00562//Inositol phosphate metabolism	K05857;K05857;K05857	-	-	GO:0044763//single-organism cellular process;GO:0051640//organelle localization
Unigene0001411	8.223	0.027	0	6.86	4.83	0.1	0	6.153	--	-	-	-	-	-	-	-	-
Unigene0001412	4.08	1.547	1.967	3.29	3.917	1.34	1.687	2.6	PLDZETA1	phospholipase D1/2 [Salvia splendens]	Metabolism;Metabolism;Cellular Processes;Metabolism;Metabolism	Global and overview maps;Global and overview maps;Transport and catabolism;Lipid metabolism;Lipid metabolism	ko01100//Metabolic pathways;ko01110//Biosynthesis of secondary metabolites;ko04144//Endocytosis;ko00564//Glycerophospholipid metabolism;ko00565//Ether lipid metabolism	K01115;K01115;K01115;K01115;K01115	-	GO:0004620//phospholipase activity;GO:0016491//oxidoreductase activity	GO:0006952//defense response;GO:0009628//response to abiotic stimulus;GO:0009755//hormone-mediated signaling pathway;GO:0016043//cellular component organization;GO:0016192//vesicle-mediated transport;GO:0031668//cellular response to extracellular stimulus;GO:0033554//cellular response to stress;GO:0035966//response to topologically incorrect protein;GO:0043067//regulation of programmed cell death…
Unigene0001413	5.39	0	0	0	11.4	0	0	0	--	-	-	-	-	-	-	-	-
Unigene0001414	0.56	0.207	0.377	0.29	0.533	0.387	0.97	0.333	pol	peroxidase 64 [Dorcoceras hygrometricum]	-	-	-	-	-	-	-
Unigene0001416	0.593	0	2.393	0.37	0.287	0	0.933	0.087	--	-	-	-	-	-	-	-	-
Unigene0001417	5.087	0.683	1.447	1.363	2.51	0.593	2.28	1.637	--	condensin complex subunit 3 [Sesamum indicum]	-	-	-	-	-	-	GO:0022402//cell cycle process
Unigene0001418	3.01	1.163	3.927	4.107	2.09	1.817	2.937	2.97	--	PREDICTED: CICLE_v10022280mg [Prunus dulcis]	-	-	-	-	GO:0043231//intracellular membrane-bounded organelle	-	-
Unigene0001419	2.16	0.973	2.74	2.93	1.773	1.167	1.577	2.52	ARL13	ADP-ribosylation factor-related protein 1 isoform D [Glycine soja]	-	-	-	-	GO:0005911//cell-cell junction;GO:0031090//organelle membrane;GO:0042995//cell projection;GO:0043231//intracellular membrane-bounded organelle;GO:0044444//cytoplasmic part	GO:0032550//purine ribonucleoside binding	GO:0035556//intracellular signal transduction;GO:0048193//Golgi vesicle transport;GO:0061024//membrane organization
Unigene0001420	2.077	11.24	14.733	1.98	6.593	9.41	3.05	15.917	--	-	-	-	-	-	-	-	-
Unigene0001421	5.583	2.99	5.107	3.037	5.06	2.717	3.307	2.15	--	mitochondrial inner membrane protease ATP23 [Salvia splendens]	-	-	-	-	-	-	-
Unigene0001422	1.057	0.07	0.437	0.07	0.177	0.167	0	0.033	--	zinc finger MYM-type protein 5-like [Cynara cardunculus var. scolymus] [Cynara cardunculus]	-	-	-	-	-	GO:0005515//protein binding	-
Unigene0001423	0.657	5.393	4.273	0.39	3.24	6.123	1.26	5.89	let-23	epidermal growth factor receptor-like, partial [Rhodamnia argentea]	-	-	-	-	-	GO:0004672//protein kinase activity	GO:0006464//cellular protein modification process;GO:0016310//phosphorylation;GO:0044699//single-organism process
Unigene0001424	0.75	6.257	3.23	0.313	1.173	2	0.857	2.06	Rim2	Solute carrier family 25 member 36-A [Gracilariopsis chorda]	-	-	-	-	GO:0009536//plastid;GO:0016020//membrane;GO:0031967//organelle envelope	-	GO:0044765//single-organism transport
Unigene0001425	1.647	0.143	0.037	0.3	0.2	0.223	0.187	0.23	--	PREDICTED: disease resistance protein RGA2-like [Erythranthe guttata]	-	-	-	-	-	-	-
Unigene0001426	0.847	0.293	1.327	0.9	0.907	0.46	1.167	0.763	--	-	-	-	-	-	-	-	-
Unigene0001427	0.35	0	0.483	1.723	0.523	0	0.41	0.9	--	-	-	-	-	-	-	-	-
Unigene0001428	0.637	0.477	4.027	1.24	0.807	0.473	6.28	0.647	--	-	-	-	-	-	-	-	-
Unigene0001429	4.887	4.427	2.257	1.757	2.97	3.73	3.023	1.337	--	-	-	-	-	-	-	-	-
Unigene0001430	0.05	0.057	1.473	0.093	0.143	0	2.597	0.103	--	PREDICTED: pentatricopeptide repeat-containing protein At1g60770 [Erythranthe guttata]	-	-	-	-	-	-	-
Unigene0001431	9.24	0.043	0	18.573	10.01	0	0.037	15.89	--	-	-	-	-	-	-	-	-
Unigene0001432	3.34	1.21	2.643	2.207	2.397	1.047	2.247	1.923	Bp10	Multicopper oxidase [Handroanthus impetiginosus]	Metabolism;Metabolism	Global and overview maps;Carbohydrate metabolism	ko01100//Metabolic pathways;ko00053//Ascorbate and aldarate metabolism	K00423;K00423	-	GO:0016682//oxidoreductase activity, acting on diphenols and related substances as donors, oxygen as acceptor	GO:0009664//plant-type cell wall organization;GO:0044710//single-organism metabolic process
Unigene0001433	2.09	0.43	3.313	2.677	2.883	0.72	4.023	2.32	--	transducin/WD40 repeat-like superfamily protein [Striga asiatica]	-	-	-	-	-	-	-
Unigene0001434	0.663	10.653	4.553	0.383	1.873	4.017	1.05	3.84	DENND5A	Dynein assembly factor with WDR repeat domains 1 [Apostasia shenzhenica]	-	-	-	-	-	-	GO:0044763//single-organism cellular process
Unigene0001435	13.093	2.647	7.247	1.257	5.17	3.307	10.86	0.883	MED31	mediator of RNA polymerase II transcription subunit 31 [Salvia splendens]	-	-	-	-	-	-	GO:0006351//transcription, DNA-templated
Unigene0001436	3.16	0	0.07	0.607	2.037	0	0	0.453	--	-	-	-	-	-	-	-	-
Unigene0001437	1.173	0.617	1.05	2.17	0.997	1.217	2.863	1.42	--	Serine/threonine protein kinase [Handroanthus impetiginosus]	-	-	-	-	-	GO:0005488//binding;GO:0016772//transferase activity, transferring phosphorus-containing groups	GO:0044237//cellular metabolic process
Unigene0001438	0.07	3.12	0.55	0.017	0.207	0.91	0.197	0.47	Ca-alpha1D	muscle calcium channel subunit alpha-1-like [Rhodamnia argentea]	-	-	-	-	-	-	GO:0006811//ion transport;GO:0009987//cellular process
Unigene0001439	15.81	10.023	13.943	15.417	20.203	10.17	18.047	16.303	CPL1	RNA polymerase II C-terminal domain phosphatase-like 1/2 [Salvia splendens]	-	-	-	-	-	GO:0016791//phosphatase activity;GO:0046914//transition metal ion binding	GO:0006355//regulation of transcription, DNA-templated;GO:0006950//response to stress;GO:0044699//single-organism process
Unigene0001440	1.047	0.843	0.243	0.297	2.337	1.243	0.223	0.377	--	LRR receptor-like serine/threonine-protein kinase EFR [Salvia splendens]	Organismal Systems;Environmental Information Processing	Environmental adaptation;Signal transduction	ko04626//Plant-pathogen interaction;ko04016//MAPK signaling pathway - plant	K13420;K13420	-	-	-
Unigene0001441	0.347	1.1	2.027	0	0.293	1.463	2.387	0.02	At3g23880	F-box and associated interaction domains-containing protein [Striga asiatica]	-	-	-	-	-	-	-
Unigene0001442	0.617	0.2	1.697	1.717	0.7	0.437	0.66	0.673	--	-	-	-	-	-	-	-	-
Unigene0001443	2.043	0	0	3.243	3.593	0	0	2.537	--	neuronal PAS domain-containing protein 4 [Striga asiatica]	-	-	-	-	-	-	-
Unigene0001444	1.987	0.403	0	1.443	3.483	0	0.06	0.79	--	-	-	-	-	-	-	-	-
Unigene0001445	0.077	0.153	0.253	0	0.04	0.02	1.64	0	--	C1-like protein [Artemisia annua]	-	-	-	-	-	-	-
Unigene0001446	0.337	2.177	0.76	0	0.94	1.763	0.153	1.087	--	-	-	-	-	-	-	-	-
Unigene0001447	0.27	0.35	0.827	0.083	0.133	0.503	0.68	0.14	--	-	-	-	-	-	-	-	-
Unigene0001448	8.803	6.213	8.87	7.217	8.447	4.78	6.877	5.76	At4g30940	BTB/POZ domain-containing protein At2g24240 [Sesamum indicum]	-	-	-	-	GO:0034705//potassium channel complex;GO:0043231//intracellular membrane-bounded organelle	-	GO:0030001//metal ion transport;GO:0032446//protein modification by small protein conjugation;GO:0051259//protein oligomerization
Unigene0001449	1.417	0.26	0	0.337	2.147	0.023	0	0.297	--	LRR receptor-like serine/threonine-protein kinase EFR [Salvia splendens]	-	-	-	-	-	-	GO:0006952//defense response;GO:0009755//hormone-mediated signaling pathway;GO:0071229//cellular response to acid chemical;GO:1901701//cellular response to oxygen-containing compound
Unigene0001450	1.113	0	0.62	0.257	0.94	0.027	0.587	0.4	--	Apoptotic ATPase [Handroanthus impetiginosus]	-	-	-	-	-	-	-
Unigene0001451	0.467	0	1.863	0	0.77	0	4.517	0	--	-	-	-	-	-	-	-	-
Unigene0001452	0.807	0.33	0.483	0.693	0.42	0.237	0.31	0.433	--	-	-	-	-	-	-	-	-
Unigene0001453	0.177	0.993	0.21	0.503	0.057	0.05	0.223	0	ARDA	actin, partial [Triticum aestivum]	-	-	-	-	GO:0005911//cell-cell junction;GO:0009526//plastid envelope;GO:0009532//plastid stroma;GO:0016020//membrane;GO:0043232//intracellular non-membrane-bounded organelle	GO:0032550//purine ribonucleoside binding	GO:0006006//glucose metabolic process;GO:0007010//cytoskeleton organization;GO:0051603//proteolysis involved in cellular protein catabolic process
Unigene0001454	29.37	10.457	26.123	23.813	19.44	11.793	24.923	15.653	ADNT1	solute carrier family 25 (mitochondrial phosphate transporter), member 23/24/25/41 [Salvia splendens]	-	-	-	-	GO:0019866//organelle inner membrane;GO:0031224//intrinsic component of membrane;GO:0043231//intracellular membrane-bounded organelle	GO:0000295//adenine nucleotide transmembrane transporter activity	GO:0006006//glucose metabolic process;GO:0006090//pyruvate metabolic process;GO:0006739//NADP metabolic process;GO:0006862//nucleotide transport;GO:0006970//response to osmotic stress;GO:0010038//response to metal ion;GO:0015695//organic cation transport;GO:0015711//organic anion transport;GO:0045333//cellular respiration;GO:0072530//purine-containing compound transmembrane transport;GO:1902582//…
Unigene0001455	6.627	3.617	7.16	6.053	7.217	3.927	6.387	5.647	--	DNA-3-methyladenine glycosylase II [Salvia splendens]	Genetic Information Processing	Replication and repair	ko03410//Base excision repair	K01247	-	-	-
Unigene0001456	46.513	25.523	40.847	41.047	51.997	17.797	56.217	40.4	RAN1A	GTP-binding nuclear protein Ran [Salvia splendens]	Genetic Information Processing;Genetic Information Processing	Translation;Translation	ko03013//RNA transport;ko03008//Ribosome biogenesis in eukaryotes	K07936;K07936	-	-	-
Unigene0001457	11.683	5.813	11.8	21.353	9.597	6.413	0.04	18.5	--	-	-	-	-	-	-	-	-
Unigene0001458	0.35	4.607	3.257	0.083	0.9	2.173	0.69	2.26	--	-	-	-	-	-	-	-	-
Unigene0001459	0.81	14.08	7.627	1.293	3.843	5.82	2.897	7.917	R166.3	AMMECR1 family [Artemisia annua]	-	-	-	-	GO:0044444//cytoplasmic part	-	-
Unigene0001460	0.297	2.25	1.617	0.05	1.233	0.983	0.68	1.553	suro-1	carboxypeptidase A1 [Capsaspora owczarzaki ATCC 30864]	-	-	-	-	-	-	-
Unigene0001461	1.127	0	5.99	0	1.243	0.027	10.427	0.067	--	-	-	-	-	-	-	-	-
Unigene0001462	0.65	12.65	5.16	0.19	2.16	4.46	1.563	4.263	PRPF3	pre-mRNA processing factor PRP3 [Capsaspora owczarzaki ATCC 30864]	Genetic Information Processing	Transcription	ko03040//Spliceosome	K12843	-	-	-
Unigene0001464	0.113	0.09	0.86	0.06	0.133	0.07	1.02	0.08	--	-	-	-	-	-	-	-	-
Unigene0001465	24.043	8.453	27.023	27.947	18.347	11.267	18.683	16.647	POB1	BTB/POZ domain-containing protein POB1 isoform X1 [Sesamum indicum]	-	-	-	-	GO:0043231//intracellular membrane-bounded organelle	GO:0046983//protein dimerization activity	GO:0003002//regionalization;GO:0003006//developmental process involved in reproduction;GO:0009639//response to red or far red light
Unigene0001466	4.947	2.737	9.777	1.093	4.207	2.1	13.467	0.76	KPHMT1	3-methyl-2-oxobutanoate hydroxymethyltransferase [Salvia splendens]	Metabolism;Metabolism;Metabolism	Global and overview maps;Global and overview maps;Metabolism of cofactors and vitamins	ko01100//Metabolic pathways;ko01110//Biosynthesis of secondary metabolites;ko00770//Pantothenate and CoA biosynthesis	K00606;K00606;K00606	GO:0009536//plastid	GO:0016491//oxidoreductase activity;GO:0016742//hydroxymethyl-, formyl- and related transferase activity;GO:0046914//transition metal ion binding	GO:0009108//coenzyme biosynthetic process
Unigene0001467	2.513	1.513	0.39	1.597	2.787	0.82	0.837	1.64	--	-	-	-	-	-	-	-	-
Unigene0001468	0.593	0	0.107	0.293	0.49	0.077	0.047	0.227	--	-	-	-	-	-	-	-	-
Unigene0001469	9.02	0.273	0.62	9.727	11.407	0.543	0.093	8.767	--	methyltransferase family protein [Striga asiatica]	-	-	-	-	-	-	-
Unigene0001470	1.487	0.23	0.367	1.28	1.067	0.34	0	0.767	--	-	-	-	-	-	-	-	-
Unigene0001471	9.433	7.963	3.533	4.423	8.697	2.24	2.947	3.043	DRAP1	dr1-associated corepressor [Sesamum indicum]	-	-	-	-	GO:0005622//intracellular	-	-
Unigene0001472	18.32	12.14	22.23	8.147	11.193	12.803	19.263	7.273	--	1,4-dihydroxy-2-naphthoate polyprenyltransferase [Catalpa bungei]	-	-	-	-	-	-	-
Unigene0001473	0.28	4.153	2.513	0.107	0.943	1.577	1.043	2.653	ANP32A	acidic leucine-rich nuclear phosphoprotein 32 family member B-like [Rhodamnia argentea]	-	-	-	-	-	-	-
Unigene0001474	0.723	8.117	4.663	0.363	1.51	2.78	1.373	2.603	UBR7	E3 ubiquitin-protein ligase UBR7 [Salvia splendens]	-	-	-	-	GO:0044424//intracellular part	-	GO:0044238//primary metabolic process;GO:0044260//cellular macromolecule metabolic process
Unigene0001475	8.587	5.373	9.727	8.75	6.147	5.53	8.573	6.26	NLP6	protein NLP5-like isoform X1 [Coffea eugenioides]	-	-	-	-	GO:0043231//intracellular membrane-bounded organelle	-	GO:0001101//response to acid chemical;GO:0006950//response to stress;GO:0042126//nitrate metabolic process
Unigene0001476	4.253	32.53	38.623	4.423	11.39	21.703	14.273	31.917	pho-1	Prostatic acid phosphatase [Gracilariopsis chorda]	-	-	-	-	-	-	-
Unigene0001477	0.893	9.167	6.383	0.23	1.747	3.563	1.103	3.597	GTF3C3	general transcription factor 3C polypeptide 3 isoform X2 [Nymphaea colorata]	-	-	-	-	-	-	-
Unigene0001478	16.317	4.523	7.263	11.963	10.88	4.437	5.583	7.61	Os01g0323300	CRS2-associated factor 2, chloroplastic [Sesamum indicum]	-	-	-	-	GO:0009532//plastid stroma;GO:0032991//macromolecular complex	GO:0003676//nucleic acid binding	GO:0000377//RNA splicing, via transesterification reactions with bulged adenosine as nucleophile;GO:0009657//plastid organization;GO:0016072//rRNA metabolic process
Unigene0001479	1.353	0.323	0.58	1.103	1.377	0.54	0	0.997	--	PREDICTED: disease resistance protein RGA2-like [Erythranthe guttata]	-	-	-	-	-	-	-
Unigene0001480	21.99	11.423	5.623	3.757	1.117	3.727	8.317	1.58	MYB2	MYB-related transcription factor [Salvia miltiorrhiza]	-	-	-	-	-	GO:0005488//binding	-
Unigene0001481	0.837	15.037	8.443	0.833	3.277	5.21	2.093	6.76	Acbd3	Golgi resident protein GCP60-like [Rhodamnia argentea]	-	-	-	-	-	-	-
Unigene0001482	0.713	7.98	4.573	0.523	2.64	4.523	1.717	5.67	Epn2	epsin 3 [Capsaspora owczarzaki ATCC 30864]	Cellular Processes	Transport and catabolism	ko04144//Endocytosis	K12471	GO:0031090//organelle membrane;GO:0043231//intracellular membrane-bounded organelle	GO:0005515//protein binding;GO:0008289//lipid binding	-
Unigene0001483	0.483	7.873	3.103	0.15	1.257	2.183	0.74	2.257	egl-10	regulator of G-protein signaling 6-like [Rhodamnia argentea]	-	-	-	-	-	-	-
Unigene0001484	0	4.17	4.39	1.183	0	0.61	1.92	1.977	JPH1	uncharacterized protein LOC115738492 [Rhodamnia argentea]	-	-	-	-	-	-	-
Unigene0001485	0.943	10.983	4.95	0.523	4.273	5.627	1.953	8.457	ifa-1	-	-	-	-	-	-	-	-
Unigene0001486	0	1.593	0	0	0	0.943	0	0	ABCB20	PREDICTED: LOW QUALITY PROTEIN: ABC transporter B family member 6 [Erythranthe guttata]	Environmental Information Processing	Membrane transport	ko02010//ABC transporters	K05658	GO:0016020//membrane	GO:0015405//P-P-bond-hydrolysis-driven transmembrane transporter activity;GO:0016887//ATPase activity	GO:0044763//single-organism cellular process;GO:0044765//single-organism transport;GO:0050896//response to stimulus
Unigene0001487	7.457	4.633	8.13	8.853	7.473	4.68	7.783	7.43	atad-3	ATPase family AAA domain-containing protein 3A/B [Salvia splendens]	-	-	-	-	GO:0016020//membrane;GO:0043231//intracellular membrane-bounded organelle	GO:0032550//purine ribonucleoside binding;GO:0042623//ATPase activity, coupled	GO:0003006//developmental process involved in reproduction;GO:0006221//pyrimidine nucleotide biosynthetic process;GO:0006997//nucleus organization;GO:0016571//histone methylation;GO:0048580//regulation of post-embryonic development
Unigene0001488	0.097	1.44	0.697	0.133	0.337	0.787	0.363	0.537	--	-	-	-	-	-	-	-	-
Unigene0001489	3.89	1.75	4.66	3.92	3.133	1.773	4.33	2.283	--	Histone acetyltransferase HAC5 [Hibiscus syriacus]	-	-	-	-	GO:0005576//extracellular region;GO:0009526//plastid envelope;GO:0009532//plastid stroma	GO:0016614//oxidoreductase activity, acting on CH-OH group of donors;GO:0048037//cofactor binding	GO:0006739//NADP metabolic process;GO:0009668//plastid membrane organization;GO:0009887//organ morphogenesis;GO:0016109//tetraterpenoid biosynthetic process;GO:0048869//cellular developmental process
Unigene0001490	5.087	1.847	5.47	6.153	5.833	3.083	5.547	3.807	RPL34	60S ribosomal protein L34-like isoform X2 [Solanum pennellii]	Genetic Information Processing	Translation	ko03010//Ribosome	K02915	GO:0009536//plastid;GO:0015934//large ribosomal subunit;GO:0031090//organelle membrane	GO:0005198//structural molecule activity	GO:0009451//RNA modification;GO:0010467//gene expression;GO:0022613//ribonucleoprotein complex biogenesis
Unigene0001491	0.977	9.637	11.453	0.94	4.603	7.247	2.967	11.53	SMPDL3B	sphingomyelin phosphodiesterase [Klebsormidium nitens]	-	-	-	-	-	-	-
Unigene0001492	0.647	9.307	6.46	0.333	2.27	4.167	1.727	5.003	--	-	-	-	-	-	-	-	-
Unigene0001493	0.813	7.18	5.68	0.433	1.973	2.94	1.423	4.233	moc-3	molybdopterin synthase sulfurylase [Capsaspora owczarzaki ATCC 30864]	Genetic Information Processing	Folding, sorting and degradation	ko04122//Sulfur relay system	K11996	-	-	-
Unigene0001494	0.393	3.553	2.613	0.087	1.93	1.563	0.663	1.973	Adk	adenosine kinase 2-like [Cucurbita pepo subsp. pepo] [Cucurbita pepo]	Metabolism;Metabolism	Global and overview maps;Nucleotide metabolism	ko01100//Metabolic pathways;ko00230//Purine metabolism	K00856;K00856	-	-	-
Unigene0001495	18.38	1.173	2.893	19.72	10.397	1.29	2.66	14.123	MMD1	PHD finger protein At2g01810 [Sesamum indicum]	-	-	-	-	GO:0043231//intracellular membrane-bounded organelle	-	GO:0006355//regulation of transcription, DNA-templated;GO:0009555//pollen development;GO:0009653//anatomical structure morphogenesis;GO:0022414//reproductive process
Unigene0001496	6.637	2.4	3.877	8.85	4.897	2.243	5.79	6.31	At1g13780	F-box/LRR-repeat protein 25-like isoform X2 [Olea europaea var. sylvestris] [Olea europaea]	-	-	-	-	-	-	-
Unigene0001497	0.69	11.87	5.087	0.327	2.32	5.133	1.493	4.763	RTF1	RNA polymerase-associated protein RTF1 homolog [Rhodamnia argentea]	-	-	-	-	-	-	GO:0010467//gene expression;GO:0016070//RNA metabolic process;GO:0044699//single-organism process;GO:0050789//regulation of biological process
Unigene0001498	1.43	0.05	0.65	0.41	1.023	0.12	1.917	0.39	--	-	-	-	-	-	-	-	-
Unigene0001499	7.277	2.74	3.773	0.737	4.873	3.237	1.133	0.367	--	bromodomain testis-specific protein-like isoform X1 [Malus domestica]	-	-	-	-	-	-	-
Unigene0001500	0.877	12.947	6.793	0.557	3.03	5.41	2.097	6.787	egl-4	cGMP-dependent protein kinase 1-like [Rhodamnia argentea]	-	-	-	-	-	GO:0016301//kinase activity	GO:0006464//cellular protein modification process;GO:0006796//phosphate-containing compound metabolic process
Unigene0001501	1.047	28.68	5.743	0.347	4.537	7.917	2.397	6.23	Fat4	-	-	-	-	-	-	-	-
Unigene0001502	2.837	0.547	4.31	3.37	2.36	0.973	3.12	2.067	--	-	-	-	-	-	-	-	-
Unigene0001503	0.48	0.11	16.043	0.47	0.573	0.137	0.323	0.47	--	protein AATF [Striga asiatica]	-	-	-	-	-	-	-
Unigene0001504	0.607	14.27	6.777	0.22	1.77	4.187	1.31	3.873	FKBP5	peptidyl-prolyl cis-trans isomerase FKBP62-like isoform X2 [Rhodamnia argentea]	-	-	-	-	-	-	-
Unigene0001505	1.357	5.617	4.43	0.74	4.16	4.87	1.263	5.237	gpt2	alanine aminotransferase 2-like [Rhodamnia argentea]	Metabolism;Metabolism;Metabolism;Metabolism;Metabolism;Metabolism;Metabolism	Global and overview maps;Global and overview maps;Global and overview maps;Energy metabolism;Amino acid metabolism;Global and overview maps;Amino acid metabolism	ko01100//Metabolic pathways;ko01200//Carbon metabolism;ko01230//Biosynthesis of amino acids;ko00710//Carbon fixation in photosynthetic organisms;ko00250//Alanine, aspartate and glutamate metabolism;ko01210//2-Oxocarboxylic acid metabolism;ko00220//Arginine biosynthesis	K00814;K00814;K00814;K00814;K00814;K00814;K00814	GO:0043231//intracellular membrane-bounded organelle;GO:0044444//cytoplasmic part	GO:0008483//transaminase activity;GO:0032550//purine ribonucleoside binding;GO:0046914//transition metal ion binding	GO:0006950//response to stress;GO:0009058//biosynthetic process;GO:0044237//cellular metabolic process;GO:0044238//primary metabolic process;GO:0044710//single-organism metabolic process;GO:0044763//single-organism cellular process;GO:0071704//organic substance metabolic process
Unigene0001506	1.033	12.203	9.42	0.497	5.307	7.847	2.677	9.87	QSOX1	sulfhydryl oxidase 2 isoform X1 [Selaginella moellendorffii]	-	-	-	-	-	-	GO:0044699//single-organism process
Unigene0001507	0.607	0	1.387	0.023	3.09	0.023	0	0.25	--	-	-	-	-	-	-	-	-
Unigene0001508	15.253	5.183	12.893	14.62	10.603	4.203	10.83	8.76	EIF6-2	Eukaryotic translation initiation factor 6-2 [Glycine soja]	Genetic Information Processing	Translation	ko03008//Ribosome biogenesis in eukaryotes	K03264	GO:0043231//intracellular membrane-bounded organelle;GO:0043232//intracellular non-membrane-bounded organelle	GO:0008135//translation factor activity, RNA binding;GO:0043021//ribonucleoprotein complex binding	GO:0006412//translation;GO:0042255//ribosome assembly
Unigene0001510	2.18	0.583	2.703	3.817	2.967	1.143	3.327	3.45	efp	elongation factor P [Salvia splendens]	-	-	-	-	GO:0009532//plastid stroma	GO:0003824//catalytic activity;GO:0005543//phospholipid binding;GO:0008135//translation factor activity, RNA binding	GO:0003006//developmental process involved in reproduction;GO:0006518//peptide metabolic process;GO:0006605//protein targeting;GO:0016043//cellular component organization;GO:0034645//cellular macromolecule biosynthetic process;GO:0044238//primary metabolic process;GO:1901566//organonitrogen compound biosynthetic process
Unigene0001511	16.617	13.26	16.05	15.76	18.187	12.607	20.32	15.363	TAF4B	transcription initiation factor TFIID subunit 4 [Salvia splendens]	Genetic Information Processing	Transcription	ko03022//Basal transcription factors	K03129	-	-	GO:0010467//gene expression;GO:0034645//cellular macromolecule biosynthetic process;GO:0044238//primary metabolic process
Unigene0001512	0.803	0.38	1.197	1.517	0.9	0.223	0.35	0.35	--	methionyl aminopeptidase [Salvia splendens]	-	-	-	-	-	-	-
Unigene0001513	18.1	2.277	21.34	15.327	17.837	8.78	17.177	13.88	ARF8	auxin response factor ARF9 [Salvia miltiorrhiza]	-	-	-	-	GO:0043231//intracellular membrane-bounded organelle	GO:0001071//nucleic acid binding transcription factor activity;GO:0005515//protein binding	GO:0003002//regionalization;GO:0009653//anatomical structure morphogenesis;GO:0009755//hormone-mediated signaling pathway;GO:0009799//specification of symmetry;GO:0010468//regulation of gene expression;GO:0034645//cellular macromolecule biosynthetic process;GO:0048507//meristem development;GO:0048580//regulation of post-embryonic development;GO:0090567//reproductive shoot system development
Unigene0001514	8.69	2.117	1.91	5.05	5	2.043	1.47	4.627	At4g27290	G-type lectin S-receptor-like serine/threonine-protein kinase At4g27290 isoform X2 [Sesamum indicum]	-	-	-	-	-	GO:0005488//binding;GO:0016301//kinase activity	GO:0044237//cellular metabolic process
Unigene0001515	0.6	6.147	2.81	0.153	0.82	2.037	0.833	1.577	CPIJ003128	Protein SMG8 [Gossypium australe]	-	-	-	-	-	-	-
Unigene0001516	0.383	5.17	2.503	0.203	1.61	2.337	0.62	2.417	wnk-1	PREDICTED: serine/threonine-protein kinase WNK8-like isoform X1 [Gossypium hirsutum]	-	-	-	-	GO:0043231//intracellular membrane-bounded organelle	GO:0004674//protein serine/threonine kinase activity	GO:0006468//protein phosphorylation;GO:0009648//photoperiodism;GO:0031668//cellular response to extracellular stimulus;GO:0033554//cellular response to stress;GO:0044710//single-organism metabolic process;GO:0044767//single-organism developmental process
Unigene0001517	3.72	10.113	3.397	4.58	6.423	2.94	2.963	3.707	WRKY76	WRKY protein [Salvia miltiorrhiza]	-	-	-	-	GO:0043231//intracellular membrane-bounded organelle	GO:0001071//nucleic acid binding transcription factor activity;GO:0003677//DNA binding;GO:0005515//protein binding	GO:0000160//phosphorelay signal transduction system;GO:0006605//protein targeting;GO:0009617//response to bacterium;GO:0009620//response to fungus;GO:0009642//response to light intensity;GO:0009694//jasmonic acid metabolic process;GO:0009696//salicylic acid metabolic process;GO:0009755//hormone-mediated signaling pathway;GO:0009863//salicylic acid mediated signaling pathway;GO:0010243//response t…
Unigene0001518	4.497	1.113	2.98	2.84	6.47	0.927	2.957	2.807	--	protein PET100 [Salvia splendens]	-	-	-	-	-	-	-
Unigene0001519	0.79	9.347	5.843	0.4	2.47	4.353	1.51	5.1	KPNB1	importin subunit beta-like [Rhodamnia argentea]	Genetic Information Processing	Translation	ko03013//RNA transport	K14293	-	-	-
Unigene0001520	6.197	0.327	0.69	0	1.74	0.357	1.017	0.033	--	-	-	-	-	-	-	-	-
Unigene0001521	0.687	0	0.347	1.573	1.037	0.043	0.2	1.65	--	-	-	-	-	-	-	-	-
Unigene0001522	1.113	0.06	0.193	2.247	4.54	0.027	0.177	3.523	--	Dimer_Tnp_hAT domain-containing protein [Cephalotus follicularis]	-	-	-	-	-	-	-
Unigene0001523	10.713	2.213	9.39	7.647	17.837	6.627	11.283	10.82	ABCB1	ATP-binding cassette, subfamily B (MDR/TAP), member 1 [Salvia splendens]	Environmental Information Processing	Membrane transport	ko02010//ABC transporters	K05658	-	-	-
Unigene0001524	19.967	12.09	10.703	14.153	13.61	9.08	14.34	10.6	--	NAD(P)-binding Rossmann-fold superfamily protein [Striga asiatica]	-	-	-	-	-	-	-
Unigene0001525	0.287	4.757	2.857	0.053	0.833	1.947	0.587	2.123	sec-5	exocyst complex component SEC5A-like isoform X1 [Carex littledalei]	-	-	-	-	-	-	GO:0044699//single-organism process
Unigene0001526	3.057	1.443	2.703	2.787	2.417	1.64	2.3	2.15	--	organellar single-stranded DNA binding protein 3 [Striga asiatica]	-	-	-	-	GO:0043231//intracellular membrane-bounded organelle	-	-
Unigene0001527	8.843	0.65	5.273	3.683	10.65	1.147	2.52	5.857	POPTRDRAFT_833824	PREDICTED: CASP-like protein 2D1 [Erythranthe guttata]	-	-	-	-	GO:0031224//intrinsic component of membrane	-	-
Unigene0001528	0.527	6.87	3.657	0.277	1.387	2.77	1.17	3.56	mcm7	DNA replication licensing ATPase [Capsaspora owczarzaki ATCC 30864]	Genetic Information Processing	Replication and repair	ko03030//DNA replication	K02210	GO:0005737//cytoplasm;GO:0043231//intracellular membrane-bounded organelle;GO:0043234//protein complex	GO:0017111//nucleoside-triphosphatase activity;GO:0097159//organic cyclic compound binding;GO:1901363//heterocyclic compound binding	GO:0006260//DNA replication;GO:0010468//regulation of gene expression;GO:0032508//DNA duplex unwinding;GO:0034968//histone lysine methylation;GO:0050794//regulation of cellular process
Unigene0001529	0.823	5.493	3.063	0.327	2.293	2.483	1.077	3.43	suro-1	carboxypeptidase A1 [Capsaspora owczarzaki ATCC 30864]	-	-	-	-	-	-	-
Unigene0001530	0.103	1.17	0.227	0	0.053	0.187	0.08	0.307	Nagk	N-acetylglucosamine kinase [Capsaspora owczarzaki ATCC 30864]	-	-	-	-	-	-	-
Unigene0001531	0.067	1.483	0.83	0.033	0.453	0.9	0.13	0.94	Nagk	N-acetylglucosamine kinase [Capsaspora owczarzaki ATCC 30864]	-	-	-	-	-	-	-
Unigene0001532	5.473	3.47	4.093	4.873	3.657	2.263	4.44	4.05	--	protein FAM133-like [Hevea brasiliensis]	-	-	-	-	GO:0005911//cell-cell junction	-	-
Unigene0001533	0.34	6.03	3.21	0.177	1.18	2.203	0.837	2.253	llgl2	-	-	-	-	-	-	-	-
Unigene0001534	0.313	5.427	8.983	0.64	0.837	1.547	1.013	3.697	--	-	-	-	-	-	-	-	-
Unigene0001535	0.47	6.147	4.023	0.153	0.663	2.447	0.82	2.107	--	DNA excision repair protein ERCC-8 [Selaginella moellendorffii]	-	-	-	-	GO:0044424//intracellular part	-	-
Unigene0001536	0.783	12.943	7.73	0.933	3.293	5.86	1.667	5.523	wdr5	WD repeat-containing protein 5 [Capsaspora owczarzaki ATCC 30864]	-	-	-	-	GO:0031461//cullin-RING ubiquitin ligase complex;GO:0035097//histone methyltransferase complex	GO:0004683//calmodulin-dependent protein kinase activity;GO:0005515//protein binding	GO:0003006//developmental process involved in reproduction
Unigene0001538	47.717	39.967	54.24	48.303	43.283	37.237	55.7	44.303	MED15A	PAX-interacting protein 1 [Salvia splendens]	-	-	-	-	-	-	GO:0010468//regulation of gene expression
Unigene0001539	0.413	0.257	0.977	0.787	0.8	0.347	0.843	0.963	GIP	gag-pol polyprotein [Striga asiatica]	-	-	-	-	-	GO:0016787//hydrolase activity	GO:0043170//macromolecule metabolic process;GO:0044238//primary metabolic process
Unigene0001540	0.04	2.427	0.47	0	0.157	0.17	0	0.24	--	-	-	-	-	-	-	-	-
Unigene0001541	0.347	8.643	1.917	0.167	1.32	2.403	0.487	1.77	ilcr-1	-	-	-	-	-	-	-	-
Unigene0001542	14.743	3.803	6.937	6.727	25.097	6.203	3.64	4.157	RPM1	Apoptotic ATPase [Handroanthus impetiginosus]	-	-	-	-	-	-	-
Unigene0001543	0.337	2.153	8.873	2.323	0.427	2.567	6.08	2.047	--	-	-	-	-	-	-	-	-
Unigene0001544	0.637	10.873	4.297	0.257	1.48	3.3	0.99	3.22	unc-32	V-type proton ATPase 116 kDa subunit a-like [Rhodamnia argentea]	Metabolism;Metabolism;Cellular Processes	Global and overview maps;Energy metabolism;Transport and catabolism	ko01100//Metabolic pathways;ko00190//Oxidative phosphorylation;ko04145//Phagosome	K02154;K02154;K02154	-	-	-
Unigene0001545	22.16	12.633	17.21	15.777	13.95	8.66	18.557	11.693	PYD2	dihydropyrimidinase [Salvia splendens]	Metabolism;Metabolism;Metabolism;Metabolism	Global and overview maps;Nucleotide metabolism;Metabolism of other amino acids;Metabolism of cofactors and vitamins	ko01100//Metabolic pathways;ko00240//Pyrimidine metabolism;ko00410//beta-Alanine metabolism;ko00770//Pantothenate and CoA biosynthesis	K01464;K01464;K01464;K01464	GO:0043231//intracellular membrane-bounded organelle	GO:0016810//hydrolase activity, acting on carbon-nitrogen (but not peptide) bonds	GO:0006208//pyrimidine nucleobase catabolic process;GO:0006625//protein targeting to peroxisome;GO:0009062//fatty acid catabolic process
Unigene0001546	1.273	10.487	8.447	0.7	3.5	5.453	1.423	6.817	--	-	-	-	-	-	-	-	-
Unigene0001547	3.447	0.16	1.68	6.193	2.367	0.143	0.483	5.65	--	zinc finger MYM-type protein 1-like [Coffea eugenioides]	-	-	-	-	GO:0005911//cell-cell junction;GO:0043231//intracellular membrane-bounded organelle	-	-
Unigene0001548	4.863	1.56	4.847	4.783	4.783	2.197	5.613	4.45	ARID2	AT-rich interactive domain-containing protein 2 [Sesamum indicum]	-	-	-	-	-	-	-
Unigene0001549	0.713	15.77	3.08	0.21	1.397	3.133	0.903	1.707	TTBK1	Serine/threonine-protein kinase, active site [Ostreococcus tauri]	-	-	-	-	-	GO:0016740//transferase activity	-
Unigene0001550	2.023	1.277	5.483	0.293	3.467	1.017	9.383	0.787	HSP18.1	HSP20 family protein [Salvia splendens]	Genetic Information Processing	Folding, sorting and degradation	ko04141//Protein processing in endoplasmic reticulum	K13993	GO:0044424//intracellular part	-	-
Unigene0001551	0.64	9.033	3.613	0.31	2.11	3.853	0.95	3.483	nep-2	PREDICTED: endothelin-converting enzyme 1-like [Pyrus x bretschneideri]	-	-	-	-	-	-	-
Unigene0001552	4.14	2.82	8.01	1.773	2.37	2.98	3.7	1.74	TIC55	protein TIC 55, chloroplastic-like [Dorcoceras hygrometricum]	-	-	-	-	GO:0009528//plastid inner membrane;GO:0031224//intrinsic component of membrane	GO:0016209//antioxidant activity;GO:0016703//oxidoreductase activity, acting on single donors with incorporation of molecular oxygen, incorporation of one atom of oxygen (internal monooxygenases or internal mixed function oxidases);GO:0016709//oxidoreductase activity, acting on paired donors, with incorporation or reduction of molecular oxygen, NAD(P)H as one donor, and incorporation of one atom …	GO:0006396//RNA processing;GO:0006605//protein targeting;GO:0006950//response to stress;GO:0044710//single-organism metabolic process
Unigene0001553	1.027	10.593	7.833	0.63	3.867	5.417	2.187	7.827	alh-9	aldehyde dehydrogenase [Capsaspora owczarzaki ATCC 30864]	Metabolism;Metabolism;Metabolism;Metabolism;Metabolism;Metabolism;Metabolism;Metabolism;Metabolism;Metabolism;Metabolism;Metabolism;Metabolism;Metabolism	Global and overview maps;Global and overview maps;Carbohydrate metabolism;Carbohydrate metabolism;Amino acid metabolism;Lipid metabolism;Amino acid metabolism;Lipid metabolism;Amino acid metabolism;Amino acid metabolism;Metabolism of other amino acids;Carbohydrate metabolism;Amino acid metabolism;Amino acid metabolism	ko01100//Metabolic pathways;ko01110//Biosynthesis of secondary metabolites;ko00010//Glycolysis / Gluconeogenesis;ko00620//Pyruvate metabolism;ko00280//Valine, leucine and isoleucine degradation;ko00561//Glycerolipid metabolism;ko00260//Glycine, serine and threonine metabolism;ko00071//Fatty acid degradation;ko00330//Arginine and proline metabolism;ko00380//Tryptophan metabolism;ko00410//beta-Alan…	K14085;K14085;K14085;K14085;K14085;K14085;K14085;K14085;K14085;K14085;K14085;K14085;K14085;K14085	-	-	-
Unigene0001554	0	1.4	2.92	0.007	0	2.267	6.043	0.007	--	E3 ubiquitin-protein ligase [Striga asiatica]	-	-	-	-	-	-	-
Unigene0001555	0.647	2.42	1.777	0.187	2.403	1.667	1.037	2.577	mlt-7	peroxidase-like [Rhodamnia argentea]	-	-	-	-	-	-	-
Unigene0001556	5.49	3.227	7.087	8.153	5.063	3.143	5.863	5.407	REL2	nitrate regulatory gene2 protein-like [Ipomoea triloba]	-	-	-	-	GO:0016020//membrane	-	-
Unigene0001557	0.53	6.847	3.86	0.227	1.29	2.483	0.857	2.287	MTOR	serine/threonine-protein kinase mTOR-like [Rhodamnia argentea]	Cellular Processes	Transport and catabolism	ko04136//Autophagy - other eukaryotes	K07203	-	-	-
Unigene0001558	635.833	51.747	187.997	187.59	365.617	142.273	326.2	455.477	CYP76T24	cytochrome P450 [Salvia miltiorrhiza]	-	-	-	-	-	-	-
Unigene0001559	0.16	4.217	3.01	0.11	0.603	1.573	0.763	1.857	NPHP4	nephrocystin-4 [Chloropicon primus]	-	-	-	-	-	-	-
Unigene0001560	0.59	0.183	1	0.527	0.877	0.143	0.46	0.203	--	traB domain-containing protein [Olea europaea var. sylvestris] [Olea europaea]	-	-	-	-	-	-	-
Unigene0001561	0.407	0.033	4.01	0.087	0.53	0.067	0.493	0.317	BAK1	brassinosteroid insensitive 1-associated receptor kinase 1 [Salvia splendens]	Organismal Systems;Environmental Information Processing;Environmental Information Processing	Environmental adaptation;Signal transduction;Signal transduction	ko04626//Plant-pathogen interaction;ko04016//MAPK signaling pathway - plant;ko04075//Plant hormone signal transduction	K13416;K13416;K13416	GO:0016020//membrane;GO:0032991//macromolecular complex;GO:0043231//intracellular membrane-bounded organelle	GO:0004672//protein kinase activity;GO:0005102//receptor binding;GO:0046983//protein dimerization activity	GO:0002239//response to oomycetes;GO:0002252//immune effector process;GO:0006605//protein targeting;GO:0009617//response to bacterium;GO:0009620//response to fungus;GO:0010243//response to organonitrogen compound;GO:0016310//phosphorylation;GO:0040007//growth;GO:0043067//regulation of programmed cell death;GO:0043401//steroid hormone mediated signaling pathway
Unigene0001562	6.323	0.533	0.547	7.88	6.897	0.65	0.763	6.833	NIK3	brassinosteroid insensitive 1-associated receptor kinase 1 [Salvia splendens]	-	-	-	-	GO:0016020//membrane	GO:0004713//protein tyrosine kinase activity;GO:0016491//oxidoreductase activity;GO:0036094//small molecule binding;GO:0097159//organic cyclic compound binding;GO:1901363//heterocyclic compound binding	GO:0000226//microtubule cytoskeleton organization;GO:0003006//developmental process involved in reproduction;GO:0006468//protein phosphorylation;GO:0048509//regulation of meristem development;GO:0050896//response to stimulus
Unigene0001563	1.893	1.127	3.42	3.377	2.86	0.26	2.25	3.67	BAK1	somatic embryogenesis receptor kinase 4 [Salvia splendens]	Organismal Systems;Environmental Information Processing;Environmental Information Processing	Environmental adaptation;Signal transduction;Signal transduction	ko04626//Plant-pathogen interaction;ko04016//MAPK signaling pathway - plant;ko04075//Plant hormone signal transduction	K13416;K13416;K13416	GO:0016020//membrane;GO:0032991//macromolecular complex;GO:0043231//intracellular membrane-bounded organelle	GO:0004674//protein serine/threonine kinase activity;GO:0005102//receptor binding;GO:0036094//small molecule binding;GO:0046983//protein dimerization activity;GO:0097159//organic cyclic compound binding;GO:1901363//heterocyclic compound binding	GO:0002239//response to oomycetes;GO:0002252//immune effector process;GO:0003006//developmental process involved in reproduction;GO:0006468//protein phosphorylation;GO:0006605//protein targeting;GO:0006996//organelle organization;GO:0007017//microtubule-based process;GO:0007059//chromosome segregation;GO:0009555//pollen development;GO:0009617//response to bacterium;GO:0009620//response to fungus;…
Unigene0001564	8.72	3.273	9.977	4.527	10.677	1.817	5.273	3.093	PRAF1	brassinosteroid insensitive 1-associated receptor kinase 1 [Salvia splendens]	-	-	-	-	GO:0044424//intracellular part	GO:0005543//phospholipid binding;GO:0017016//Ras GTPase binding;GO:0046914//transition metal ion binding	GO:0050794//regulation of cellular process
Unigene0001565	0.123	2.963	1.36	0.117	0.733	1.167	0.533	1.19	Ddc	aromatic-L-amino-acid decarboxylase-like [Rhodamnia argentea]	Metabolism;Metabolism;Metabolism;Metabolism;Metabolism;Metabolism;Metabolism;Metabolism	Global and overview maps;Global and overview maps;Amino acid metabolism;Amino acid metabolism;Amino acid metabolism;Biosynthesis of other secondary metabolites;Biosynthesis of other secondary metabolites;Biosynthesis of other secondary metabolites	ko01100//Metabolic pathways;ko01110//Biosynthesis of secondary metabolites;ko00350//Tyrosine metabolism;ko00380//Tryptophan metabolism;ko00360//Phenylalanine metabolism;ko00950//Isoquinoline alkaloid biosynthesis;ko00965//Betalain biosynthesis;ko00901//Indole alkaloid biosynthesis	K01593;K01593;K01593;K01593;K01593;K01593;K01593;K01593	GO:0044424//intracellular part	GO:0016831//carboxy-lyase activity	GO:0006950//response to stress;GO:0046189//phenol-containing compound biosynthetic process
Unigene0001566	2.89	31.457	14.933	1.3	8.227	13.74	5.353	15.493	vha-12	vacuolar ATP synthase subunit B [Capsaspora owczarzaki ATCC 30864]	Metabolism;Metabolism;Cellular Processes	Global and overview maps;Energy metabolism;Transport and catabolism	ko01100//Metabolic pathways;ko00190//Oxidative phosphorylation;ko04145//Phagosome	K02147;K02147;K02147	GO:0031090//organelle membrane;GO:0033176//proton-transporting V-type ATPase complex;GO:0043231//intracellular membrane-bounded organelle	GO:0003824//catalytic activity;GO:0022857//transmembrane transporter activity;GO:0032550//purine ribonucleoside binding	GO:0009150//purine ribonucleotide metabolic process;GO:0015988//energy coupled proton transmembrane transport, against electrochemical gradient
Unigene0001567	0.65	7.77	3.96	0.37	1.36	2.917	0.793	2.733	PRPF4	U4/U6 small nuclear ribonucleoprotein Prp4 [Capsaspora owczarzaki ATCC 30864]	Genetic Information Processing	Transcription	ko03040//Spliceosome	K12662	GO:0044464//cell part	-	-
Unigene0001568	5.17	3.183	3.133	1.76	3.093	0.967	2.27	0.897	GRF12	14-3-3 protein [Macleaya cordata]	-	-	-	-	GO:0009532//plastid stroma;GO:0016020//membrane	GO:0046872//metal ion binding;GO:0051219//phosphoprotein binding	GO:0000097//sulfur amino acid biosynthetic process;GO:0006090//pyruvate metabolic process;GO:0006970//response to osmotic stress;GO:0006996//organelle organization;GO:0008104//protein localization;GO:0009746//response to hexose;GO:0009791//post-embryonic development;GO:0010038//response to metal ion;GO:0042044//fluid transport;GO:0042743//hydrogen peroxide metabolic process;GO:0048827//phyllome d…
Unigene0001569	4.287	0.39	7.947	2.69	3.417	0.557	3.57	1.787	--	-	-	-	-	-	-	-	-
Unigene0001570	16.397	13.16	18.283	23.157	11.79	8.547	21.833	18.8	RIK	protein RIK isoform X5 [Sesamum indicum]	-	-	-	-	-	GO:0005488//binding	-
Unigene0001571	0.68	8.293	4.06	0.237	1.627	3.197	0.827	2.87	chid1	chitinase domain-containing protein 1 [Selaginella moellendorffii]	-	-	-	-	-	-	-
Unigene0001572	10.15	9.07	14.267	11.363	8.38	9.527	11.177	9.497	NUP205	nuclear pore complex protein Nup205 [Salvia splendens]	Genetic Information Processing	Translation	ko03013//RNA transport	K14310	GO:0009536//plastid;GO:0046930//pore complex	-	-
Unigene0001573	0.84	7.777	5.353	0.317	1.833	3.37	1.35	3.857	Cars1	cysteinyl-tRNA synthetase [Capsaspora owczarzaki ATCC 30864]	Genetic Information Processing	Translation	ko00970//Aminoacyl-tRNA biosynthesis	K01883	-	-	-
Unigene0001574	0.587	7.017	4.01	0.4	1.367	2.69	1.02	3.25	Hbs1l	Translation elongation factor EF-1 alpha/Tu [Klebsormidium nitens]	Genetic Information Processing	Translation	ko03015//mRNA surveillance pathway	K14416	-	GO:0005488//binding	GO:0008152//metabolic process
Unigene0001575	0.413	3.9	2.697	0.21	0.953	1.837	0.593	2.253	IARS2	Isoleucine--tRNA ligase [Chloropicon primus]	Genetic Information Processing	Translation	ko00970//Aminoacyl-tRNA biosynthesis	K01870	GO:0009536//plastid	GO:0003824//catalytic activity	GO:0003006//developmental process involved in reproduction;GO:0016043//cellular component organization;GO:0044249//cellular biosynthetic process;GO:0044267//cellular protein metabolic process;GO:0044710//single-organism metabolic process;GO:0044763//single-organism cellular process;GO:1901576//organic substance biosynthetic process
Unigene0001576	0	0.6	0.277	0	0.077	0	0.083	0.237	--	L-2-aminoadipate reductase [Hondaea fermentalgiana]	-	-	-	-	-	-	-
Unigene0001577	1.007	12.817	3.877	0.297	2.533	4.377	1.293	3.957	cit-1.1	PREDICTED: cyclin-L1-1 [Fragaria vesca subsp. vesca] [Fragaria vesca]	-	-	-	-	-	-	GO:0009987//cellular process
Unigene0001578	0.6	8.877	4.483	0.263	1.603	4.19	1.38	3.51	R3HDM1	-	-	-	-	-	-	-	-
Unigene0001579	0.64	8.727	4.38	0.223	1.623	2.723	0.717	3.027	--	light-mediated development protein DET1 isoform X1 [Punica granatum]	-	-	-	-	-	-	-
Unigene0001580	0.907	14.573	5.507	0.637	2.933	4.697	1.51	6.333	fat-4	RecName: Full=Delta(8)-fatty-acid desaturase; AltName: Full=Acyl-lipid (11-3)-desaturase; AltName: Full=Delta(8)-sphingolipid desaturase [Euglena gracilis]	-	-	-	-	-	-	-
Unigene0001581	0.21	5.01	1.853	0.143	0.59	1.337	0.647	1.223	gap-1	telomerase Cajal body protein 1 [Cannabis sativa]	-	-	-	-	-	-	-
Unigene0001582	5.4	1.06	3.183	2.447	7.27	2.137	1.843	0.64	At3g47110	PREDICTED: probable LRR receptor-like serine/threonine-protein kinase At3g47570 [Erythranthe guttata]	Organismal Systems;Environmental Information Processing	Environmental adaptation;Signal transduction	ko04626//Plant-pathogen interaction;ko04016//MAPK signaling pathway - plant	K13420;K13420	-	GO:0016301//kinase activity	-
Unigene0001583	0.087	0.613	0.967	0.147	0	0	0	0	--	-	-	-	-	-	-	-	-
Unigene0001584	1.9	29.047	18.113	1.3	8.117	14.523	6.407	16.397	Wbp2nl	UPF0664 stress-induced protein C29B12.11c-like [Lactuca sativa]	-	-	-	-	-	-	-
Unigene0001585	0.993	0	0.627	0.153	0.31	0	0	0	--	-	-	-	-	-	-	-	-
Unigene0001586	0.45	4.913	3.743	0.38	1.52	2.237	0.997	3.407	Ptbp1	polypyrimidine tract-binding protein homolog 3 isoform X2 [Abrus precatorius]	-	-	-	-	GO:0005737//cytoplasm;GO:0043229//intracellular organelle	-	GO:0010468//regulation of gene expression
Unigene0001587	0.79	12.623	7.37	0.487	3.243	5.8	2.117	6.763	B0495.5	spermatogenesis-associated protein 20 [Capsaspora owczarzaki ATCC 30864]	-	-	-	-	GO:0009536//plastid	-	-
Unigene0001588	4.693	3.89	5.127	4.827	2.14	2.963	5.31	3.467	METE	5-methyltetrahydropteroyltriglutamate--homocysteine methyltransferase [Salvia splendens]	Metabolism;Metabolism;Metabolism;Metabolism;Metabolism	Global and overview maps;Global and overview maps;Global and overview maps;Amino acid metabolism;Metabolism of other amino acids	ko01100//Metabolic pathways;ko01110//Biosynthesis of secondary metabolites;ko01230//Biosynthesis of amino acids;ko00270//Cysteine and methionine metabolism;ko00450//Selenocompound metabolism	K00549;K00549;K00549;K00549;K00549	GO:0005576//extracellular region;GO:0005911//cell-cell junction;GO:0009526//plastid envelope;GO:0009532//plastid stroma;GO:0031090//organelle membrane;GO:0042579//microbody	GO:0008172//S-methyltransferase activity;GO:0016620//oxidoreductase activity, acting on the aldehyde or oxo group of donors, NAD or NADP as acceptor;GO:0016627//oxidoreductase activity, acting on the CH-CH group of donors;GO:0046914//transition metal ion binding	GO:0000097//sulfur amino acid biosynthetic process;GO:0006970//response to osmotic stress;GO:0010038//response to metal ion;GO:0010208//pollen wall assembly
Unigene0001589	15.697	7.017	11.4	13.667	13.943	7.423	8	10.193	--	T1N6.18 protein [Striga asiatica]	-	-	-	-	-	-	-
Unigene0001590	0.91	9.153	6.737	0.513	2.637	4.243	1.68	5.08	mogs-1	mannosyl-oligosaccharide glucosidase [Salvia splendens]	Metabolism;Genetic Information Processing;Metabolism	Global and overview maps;Folding, sorting and degradation;Glycan biosynthesis and metabolism	ko01100//Metabolic pathways;ko04141//Protein processing in endoplasmic reticulum;ko00510//N-Glycan biosynthesis	K01228;K01228;K01228	GO:0043231//intracellular membrane-bounded organelle	GO:0090599//alpha-glucosidase activity	GO:0010015//root morphogenesis;GO:0030855//epithelial cell differentiation
Unigene0001591	2.46	40.093	20.84	1.197	9.137	19.843	6.327	19.94	his-4	PREDICTED: histone H2B [Oryza brachyantha]	-	-	-	-	-	-	-
Unigene0001592	9.34	72.507	54.03	4.423	20.54	29.483	11.9	46.813	F46H5.3	arginine kinase Lit v 2.0101-like [Rhodamnia argentea]	-	-	-	-	-	GO:0003824//catalytic activity	-
Unigene0001594	0.467	6.493	3.473	0.19	1.363	2.64	0.867	2.447	--	-	-	-	-	-	-	-	-
Unigene0001595	33.143	9.597	22.307	8.68	21.44	4.507	5.123	6.697	--	plastid-targeted protein 4 [Striga asiatica]	-	-	-	-	-	-	-
Unigene0001596	0.797	0.583	1.053	2.78	0.677	0.477	1.783	2.17	--	disease resistance RPP8-like protein 3 isoform X2 [Olea europaea var. sylvestris] [Olea europaea]	-	-	-	-	-	-	-
Unigene0001597	0.227	4.72	1.84	0.107	0.747	1.577	0.393	1.55	GTF2E1	general transcription factor IIE subunit 1-like [Rhodamnia argentea]	Genetic Information Processing	Transcription	ko03022//Basal transcription factors	K03136	-	-	-
Unigene0001598	0.26	6.08	2.803	0.13	1.08	2.433	0.473	2.28	inf2	formin-like protein 6 isoform X1 [Aegilops tauschii subsp. tauschii] [Aegilops tauschii]	-	-	-	-	-	-	-
Unigene0001599	18.903	11.57	17.477	12.253	11.227	6.523	14.58	8.553	ATG18D	autophagy-related protein 18c [Sesamum indicum]	-	-	-	-	GO:0016020//membrane;GO:0043227//membrane-bounded organelle;GO:0044444//cytoplasmic part	GO:0043169//cation binding	GO:0006810//transport;GO:0044248//cellular catabolic process;GO:0044763//single-organism cellular process
Unigene0001600	0.583	9.8	4.163	0.257	2.03	3.83	1.247	3.873	--	-	-	-	-	-	-	-	-
Unigene0001601	1.74	15.75	12.523	1.143	4.533	8.043	3.603	10.793	AGO5	Protein argonaute 5 [Glycine soja]	-	-	-	-	GO:0044424//intracellular part	GO:0005488//binding	GO:0006259//DNA metabolic process;GO:0016070//RNA metabolic process;GO:0016441//posttranscriptional gene silencing;GO:0016570//histone modification;GO:0031047//gene silencing by RNA;GO:0048731//system development;GO:0051716//cellular response to stimulus;GO:0080090//regulation of primary metabolic process;GO:2000112//regulation of cellular macromolecule biosynthetic process
Unigene0001602	19.387	9.387	14.837	17.397	16.173	9.037	15.68	14.05	Ubxn1	chromatin assembly factor 1 subunit A [Sesamum indicum]	-	-	-	-	GO:0044444//cytoplasmic part	GO:0043169//cation binding	GO:0006464//cellular protein modification process;GO:0006605//protein targeting
Unigene0001603	0.953	0.38	0.917	0.873	0.987	0.447	1.037	0.463	--	-	-	-	-	-	-	-	-
Unigene0001604	81.063	64.85	91.977	99.96	35.57	106.13	136.383	85.733	TIP1-1	aquaporin TIP [Salvia splendens]	-	-	-	-	-	-	-
Unigene0001605	0.4	9.08	4.12	0.187	0.68	2.44	0.593	1.68	Nrxn3	neurexin-4-like [Rhodamnia argentea]	-	-	-	-	-	-	-
Unigene0001606	22.897	12.27	29.077	24.363	17.93	13.227	19.71	17.533	At2g42960	Serine/threonine protein kinase [Handroanthus impetiginosus]	-	-	-	-	GO:0005911//cell-cell junction;GO:0016020//membrane	GO:0004702//receptor signaling protein serine/threonine kinase activity;GO:0032550//purine ribonucleoside binding	GO:0032147//activation of protein kinase activity
Unigene0001607	0.11	6.867	1.007	0.027	0.477	1.303	0.457	0.543	unc-22	fibronectin type-III domain-containing protein 3a isoform X1 [Selaginella moellendorffii]	-	-	-	-	-	-	-
Unigene0001608	0.953	11.317	4.323	0.27	2.333	4.45	1.317	4.497	rsp-7	probable splicing factor, arginine/serine-rich 7 [Rhodamnia argentea]	-	-	-	-	-	-	-
Unigene0001609	2.28	18.14	11.913	1.093	3.743	10.297	2.953	8.8	SKP1	SKP1-like protein ASK10, partial [Arabidopsis thaliana]	Genetic Information Processing;Genetic Information Processing	Folding, sorting and degradation;Folding, sorting and degradation	ko04141//Protein processing in endoplasmic reticulum;ko04120//Ubiquitin mediated proteolysis	K03094;K03094	-	GO:0005488//binding	GO:0006511//ubiquitin-dependent protein catabolic process;GO:0007049//cell cycle;GO:0016043//cellular component organization;GO:0050794//regulation of cellular process
Unigene0001610	0.933	16.623	7.81	0.887	3.7	7.353	2.557	8.157	ogt-1	UDP-N-acetylglucosamine--peptide N-acetylglucosaminyltransferase 110 kDa subunit-like [Rhodamnia argentea]	Metabolism	Glycan biosynthesis and metabolism	ko00514//Other types of O-glycan biosynthesis	K09667	-	GO:0016740//transferase activity	GO:0006486//protein glycosylation
Unigene0001611	0.59	9.07	3.363	0.247	1.867	3.857	0.84	3.517	WDR62	WD repeat-containing protein 62 [Selaginella moellendorffii]	-	-	-	-	-	-	-
Unigene0001612	0.19	4.82	1.803	0.177	0.833	1.783	0.627	1.363	Kank3	KN motif and ankyrin repeat domain-containing protein 1-like [Rhodamnia argentea]	-	-	-	-	-	-	-
Unigene0001613	1.09	4.09	9.067	0.91	3.857	7.993	1.3	13.007	--	-	-	-	-	-	-	-	-
Unigene0001614	24.783	9.083	15.64	20.933	28.98	11.673	17.887	21.583	Plaa	phospholipase A-2-activating protein [Salvia splendens]	Genetic Information Processing	Folding, sorting and degradation	ko04141//Protein processing in endoplasmic reticulum	K14018	GO:0005911//cell-cell junction;GO:0043231//intracellular membrane-bounded organelle;GO:0044444//cytoplasmic part	-	-
Unigene0001615	0.497	9.467	3.523	0.137	1.813	3.443	0.757	2.98	DDX42	ATP-dependent RNA helicase DDX42-like [Rhodamnia argentea]	Genetic Information Processing	Transcription	ko03040//Spliceosome	K12835	GO:0044424//intracellular part	GO:0017111//nucleoside-triphosphatase activity;GO:0097159//organic cyclic compound binding;GO:1901363//heterocyclic compound binding	-
Unigene0001616	11.883	7.87	10.2	9.697	9.39	5.157	9.6	8.313	NPP2	serine/threonine-protein phosphatase PP1 isozyme 2 [Sesamum indicum]	Genetic Information Processing	Translation	ko03015//mRNA surveillance pathway	K06269	GO:0008287//protein serine/threonine phosphatase complex	GO:0004721//phosphoprotein phosphatase activity;GO:0043169//cation binding	GO:0003006//developmental process involved in reproduction;GO:0006498//N-terminal protein lipidation;GO:0006796//phosphate-containing compound metabolic process;GO:0018205//peptidyl-lysine modification;GO:0042743//hydrogen peroxide metabolic process
Unigene0001618	41.797	17.623	39.037	28.463	50.767	19.363	45.913	68.75	CYP72A225	cytochrome P450 CYP72A219-like isoform X3 [Olea europaea var. sylvestris] [Olea europaea]	-	-	-	-	GO:0016020//membrane;GO:0043231//intracellular membrane-bounded organelle	GO:0016491//oxidoreductase activity;GO:0046872//metal ion binding	-
Unigene0001619	0.143	3.667	1.743	0.087	0.467	1.2	0.277	1.277	Brpf1	peregrin-like [Rhodamnia argentea]	-	-	-	-	GO:0043229//intracellular organelle	GO:0008168//methyltransferase activity;GO:0043167//ion binding	GO:0003006//developmental process involved in reproduction;GO:0009791//post-embryonic development;GO:0009887//organ morphogenesis;GO:0016458//gene silencing;GO:0034645//cellular macromolecule biosynthetic process;GO:0034968//histone lysine methylation;GO:0090304//nucleic acid metabolic process
Unigene0001620	2.447	3.293	2.207	3.503	1.207	1.843	2.977	1.62	--	bric-a-brac protein [Parasponia andersonii]	-	-	-	-	-	-	-
Unigene0001621	0.477	5.26	4.2	0.227	1.243	2.393	1.017	2.477	chl-1	dead h (asp-glu-ala-asp his) box polypeptide 11 [Nannochloropsis gaditana]	-	-	-	-	-	GO:0016817//hydrolase activity, acting on acid anhydrides	GO:0006259//DNA metabolic process;GO:0007126//meiotic nuclear division;GO:0034645//cellular macromolecule biosynthetic process;GO:0044710//single-organism metabolic process;GO:0050794//regulation of cellular process;GO:0050896//response to stimulus;GO:0051276//chromosome organization;GO:0060255//regulation of macromolecule metabolic process;GO:0065008//regulation of biological quality;GO:1902589/…
Unigene0001622	0.243	5.167	2.057	0.087	0.97	2.117	0.773	1.48	--	-	-	-	-	-	-	-	-
Unigene0001623	5.003	0.98	5.27	2.22	14.347	0.417	0.78	1.833	NAC022	NAC domain-containing protein 35-like [Sesamum indicum]	-	-	-	-	GO:0043231//intracellular membrane-bounded organelle	GO:0001071//nucleic acid binding transcription factor activity;GO:0003676//nucleic acid binding	GO:0003006//developmental process involved in reproduction;GO:0008361//regulation of cell size;GO:0009887//organ morphogenesis;GO:0010468//regulation of gene expression;GO:0034645//cellular macromolecule biosynthetic process;GO:0045087//innate immune response
Unigene0001624	0.307	7.53	2.083	0.09	0.743	1.99	0.47	1.643	Nek8	serine/threonine-protein kinase [Chloropicon primus]	-	-	-	-	-	GO:0004672//protein kinase activity	GO:0006796//phosphate-containing compound metabolic process
Unigene0001625	1.47	19.247	6.93	0.707	3.383	6.267	2.237	6.58	CBX2	probable chromo domain-containing protein LHP1 [Papaver somniferum]	-	-	-	-	-	-	GO:0006351//transcription, DNA-templated;GO:0007275//multicellular organism development;GO:0010629//negative regulation of gene expression;GO:0040029//regulation of gene expression, epigenetic;GO:0044763//single-organism cellular process;GO:0050794//regulation of cellular process
Unigene0001626	6.267	2.77	3.483	5.44	7.49	2.383	2.703	3.94	--	-	-	-	-	-	-	-	-
Unigene0001627	6.96	17.387	10.75	1.443	10.523	10.303	5.61	17.177	cth-2	cystathionine gamma-lyase [Capsaspora owczarzaki ATCC 30864]	Metabolism;Metabolism;Metabolism;Metabolism;Metabolism;Metabolism	Global and overview maps;Global and overview maps;Global and overview maps;Amino acid metabolism;Amino acid metabolism;Metabolism of other amino acids	ko01100//Metabolic pathways;ko01110//Biosynthesis of secondary metabolites;ko01230//Biosynthesis of amino acids;ko00270//Cysteine and methionine metabolism;ko00260//Glycine, serine and threonine metabolism;ko00450//Selenocompound metabolism	K01758;K01758;K01758;K01758;K01758;K01758	GO:0009532//plastid stroma	GO:0016765//transferase activity, transferring alkyl or aryl (other than methyl) groups;GO:0016846//carbon-sulfur lyase activity;GO:0043168//anion binding	GO:0009086//methionine biosynthetic process
Unigene0001628	131.017	37.067	120.63	117.57	136.403	92.013	164.303	119.913	CPN60B2	ruBisCO large subunit-binding protein subunit beta, chloroplastic [Sesamum indicum]	Genetic Information Processing	Folding, sorting and degradation	ko03018//RNA degradation	K04077	GO:0009536//plastid	GO:0032550//purine ribonucleoside binding	GO:0006457//protein folding
Unigene0001629	5.003	4.58	4.997	3.857	4.823	3.653	5.5	3.177	At1g71210	pentatricopeptide repeat protein [Salvia miltiorrhiza]	-	-	-	-	-	-	-
Unigene0001630	3.213	1.747	3.833	2.12	2	2.21	3.21	1.83	--	adenylate kinase [Handroanthus impetiginosus]	-	-	-	-	GO:0009536//plastid	-	GO:0005982//starch metabolic process;GO:0009893//positive regulation of metabolic process;GO:0043623//cellular protein complex assembly
Unigene0001631	0.29	4.643	1.463	0.08	0.923	1.337	0.41	1.457	--	-	-	-	-	-	-	-	-
Unigene0001632	0.167	3.247	1.21	0.04	0.29	0.877	0.213	0.533	trr-1	transformation/transcription domain-associated protein-like [Malus domestica]	-	-	-	-	-	-	-
Unigene0001633	5.037	2.697	5.58	3.833	2.22	2.633	6.423	2.443	rplQ	large subunit ribosomal protein L17 [Salvia splendens]	Genetic Information Processing	Translation	ko03010//Ribosome	K02879	GO:0009536//plastid;GO:0030529//intracellular ribonucleoprotein complex	-	GO:0000097//sulfur amino acid biosynthetic process;GO:0008380//RNA splicing;GO:0032774//RNA biosynthetic process
Unigene0001634	20.29	4.74	12.61	8.4	15.393	3.107	5.7	6.17	RABH1B	Small GTP-binding domain containing protein [Trema orientale]	-	-	-	-	-	-	-
Unigene0001635	14.62	7.97	15.687	12.807	10.893	9.103	13.09	9.42	GCN2	eIF-2-alpha kinase GCN2 isoform X1 [Sesamum indicum]	Genetic Information Processing	Folding, sorting and degradation	ko04141//Protein processing in endoplasmic reticulum	K16196	GO:0043231//intracellular membrane-bounded organelle	GO:0003723//RNA binding;GO:0004674//protein serine/threonine kinase activity;GO:0032550//purine ribonucleoside binding	GO:0006468//protein phosphorylation;GO:0010565//regulation of cellular ketone metabolic process
Unigene0001636	2.84	0	0	0	0	0	0	0	--	receptor-like protein kinase [Trifolium pratense]	-	-	-	-	-	-	-
Unigene0001637	0.403	2.917	1.51	0.097	0.98	1.48	0.217	1.047	C9orf64	queuosine salvage protein-like [Quercus suber]	-	-	-	-	-	-	-
Unigene0001638	0.59	0	2.503	2.587	0.113	0.047	0.03	0	ZMPMS1	zein [Zea mays]	-	-	-	-	-	-	-
Unigene0001639	0.393	5.413	1.897	0.133	0.737	1.72	0.503	1.523	ERCC6	DNA excision repair protein ERCC-6-like [Rhodamnia argentea]	Genetic Information Processing	Replication and repair	ko03420//Nucleotide excision repair	K10841	-	GO:0005488//binding;GO:0016818//hydrolase activity, acting on acid anhydrides, in phosphorus-containing anhydrides	GO:0009987//cellular process
Unigene0001640	6.27	2.42	1.82	17.603	7.897	1.867	4.95	14.993	ACT	RecName: Full=Pelargonidin 3-O-(6-caffeoylglucoside) 5-O-(6-O-malonylglucoside) 4'''-malonyltransferase; AltName: Full=Anthocyanin 5-O-glucoside-4'''-O-malonyltransferase 2; Short=Ss5MaT2 [Salvia splendens]	-	-	-	-	-	GO:0016746//transferase activity, transferring acyl groups	GO:0009813//flavonoid biosynthetic process;GO:0044699//single-organism process
Unigene0001641	0	7.033	0.307	0.123	0.25	0.767	0.507	0.183	CRISP2	pathogenesis-related protein PRB1-3-like [Physcomitrella patens]	Organismal Systems;Environmental Information Processing;Environmental Information Processing	Environmental adaptation;Signal transduction;Signal transduction	ko04626//Plant-pathogen interaction;ko04016//MAPK signaling pathway - plant;ko04075//Plant hormone signal transduction	K13449;K13449;K13449	-	-	-
Unigene0001642	2.627	0.617	0.053	0	1.72	0.15	0	0	--	N-acetylated-alpha-linked acidic dipeptidase [Salvia splendens]	-	-	-	-	-	-	-
Unigene0001643	0.487	13.677	3.57	0.24	2.31	3.647	0.72	3.01	--	hypothetical protein Lal_00011137 [Lupinus albus]	-	-	-	-	-	-	-
Unigene0001644	38.53	23.14	42.01	36.02	32.07	23.797	40.353	31.437	prp39	pre-mRNA-processing factor 39 [Salvia splendens]	-	-	-	-	-	-	GO:0006396//RNA processing
Unigene0001645	1.32	0.377	5.003	7.353	1.493	1.187	9.203	6.62	--	beta-taxilin-like, partial [Pyrus ussuriensis x Pyrus communis]	-	-	-	-	-	GO:0000149//SNARE binding	-
Unigene0001646	0.563	0.27	0.327	0.277	0.183	0.163	0.37	0.097	--	DNA repair protein RAD50, ABC-type ATPase/SMC superfamily [Handroanthus impetiginosus]	-	-	-	-	-	-	-
Unigene0001647	1.357	15.077	8.49	0.887	5.26	6.533	2.533	10.15	COPA	coatomer protein complex [Micromonas commoda]	-	-	-	-	GO:0030117//membrane coat;GO:0043231//intracellular membrane-bounded organelle	-	GO:0007017//microtubule-based process;GO:0009606//tropism;GO:0016192//vesicle-mediated transport;GO:0019941//modification-dependent protein catabolic process;GO:0030243//cellulose metabolic process;GO:0035966//response to topologically incorrect protein;GO:0043094//cellular metabolic compound salvage;GO:0043248//proteasome assembly;GO:0046907//intracellular transport;GO:1902410//mitotic cytokinet…
Unigene0001648	16.787	8.663	14.15	12.86	10.64	8.04	11.993	9.127	CCS	copper chaperone for superoxide dismutase, chloroplastic/cytosolic [Sesamum indicum]	-	-	-	-	-	-	-
Unigene0001649	74.273	143.827	94.787	94.687	105.113	73.85	165.487	78.123	--	titin isoform X3 [Sesamum indicum]	-	-	-	-	-	-	-
Unigene0001650	56.68	25.847	45.423	49.37	52.73	25.683	48.66	39.5	At5g49945	coiled-coil domain-containing protein 47 [Striga asiatica]	-	-	-	-	GO:0043231//intracellular membrane-bounded organelle;GO:0044425//membrane part	-	GO:0016192//vesicle-mediated transport;GO:0030243//cellulose metabolic process
Unigene0001651	17.77	16.327	19.183	15.397	12.65	9.627	16.883	12.773	BPM4	speckle-type POZ protein [Salvia splendens]	-	-	-	-	GO:0044444//cytoplasmic part	-	GO:0032446//protein modification by small protein conjugation
Unigene0001652	0	2.37	15.083	0	0	2.953	15.243	0	--	-	-	-	-	-	-	-	-
Unigene0001653	15.24	4.323	15.547	11.167	17.143	9.06	16.3	11.03	PUR2	phosphoribosylamine--glycine ligase [Salvia splendens]	Metabolism;Metabolism;Metabolism	Global and overview maps;Global and overview maps;Nucleotide metabolism	ko01100//Metabolic pathways;ko01110//Biosynthesis of secondary metabolites;ko00230//Purine metabolism	K01945;K01945;K01945	GO:0009532//plastid stroma	GO:0016879//ligase activity, forming carbon-nitrogen bonds;GO:0032550//purine ribonucleoside binding;GO:0043169//cation binding	GO:0006144//purine nucleobase metabolic process;GO:0006188//IMP biosynthetic process
Unigene0001654	1.077	7.147	5.763	0.133	1.587	3.83	1.207	4.22	--	PREDICTED: ascorbate transporter, chloroplastic-like [Nelumbo nucifera]	-	-	-	-	-	-	GO:0006950//response to stress;GO:0044763//single-organism cellular process;GO:0044765//single-organism transport;GO:0050789//regulation of biological process
Unigene0001655	0.4	7.203	3.673	0.24	1.17	2.397	0.627	2.513	fan-1	fanconi-associated nuclease 1 homolog [Pistacia vera]	-	-	-	-	-	-	-
Unigene0001657	1.66	0	0.883	1.86	1.883	0.117	2.007	2.1	--	-	-	-	-	-	-	-	-
Unigene0001658	15.527	13.42	23.277	18.473	14.753	15.493	22.093	16.15	At1g74260	phosphoribosylformylglycinamidine synthase [Salvia splendens]	Metabolism;Metabolism;Metabolism	Global and overview maps;Global and overview maps;Nucleotide metabolism	ko01100//Metabolic pathways;ko01110//Biosynthesis of secondary metabolites;ko00230//Purine metabolism	K01952;K01952;K01952	GO:0009536//plastid	GO:0016884//carbon-nitrogen ligase activity, with glutamine as amido-N-donor;GO:0032550//purine ribonucleoside binding	GO:0006188//IMP biosynthetic process;GO:0009064//glutamine family amino acid metabolic process
Unigene0001659	0.843	8.423	4.247	0.08	1.947	3.013	1.2	3.333	--	-	-	-	-	-	-	-	-
Unigene0001660	0.73	0.113	0.467	0.817	1.017	0.647	0.51	0.87	Os01g0252200	PREDICTED: zinc finger CCCH domain-containing protein 3 isoform X2 [Erythranthe guttata]	-	-	-	-	-	GO:0046872//metal ion binding	-
Unigene0001661	0.353	4.587	3.043	0.167	0.92	2.133	0.767	1.74	C37H5.5	NOC3p-domain-containing protein [Fragilariopsis cylindrus CCMP1102]	-	-	-	-	-	-	-
Unigene0001662	0.217	3.37	3.013	0.35	1.13	1.403	1.153	3.21	Y51H4A.7	urocanate hydratase [Capsaspora owczarzaki ATCC 30864]	Metabolism;Metabolism	Global and overview maps;Amino acid metabolism	ko01100//Metabolic pathways;ko00340//Histidine metabolism	K01712;K01712	-	GO:0016829//lyase activity	-
Unigene0001663	4.557	1.763	5.007	4.86	4.653	3.163	4.763	4.563	rsmI	16S rRNA (cytidine1402-2'-O)-methyltransferase [Salvia splendens]	-	-	-	-	-	GO:0016741//transferase activity, transferring one-carbon groups	GO:0009404//toxin metabolic process;GO:0014070//response to organic cyclic compound
Unigene0001664	0.267	2.25	1.62	0.15	0.853	1.413	0.467	1.167	NAB2	-	-	-	-	-	-	-	-
Unigene0001665	1.067	13.617	8.19	0.69	3.663	7.03	1.953	7.4	ogdh-1	2-oxoglutarate dehydrogenase-like, mitochondrial [Rhodamnia argentea]	Metabolism;Metabolism;Metabolism;Metabolism	Global and overview maps;Global and overview maps;Global and overview maps;Carbohydrate metabolism	ko01100//Metabolic pathways;ko01110//Biosynthesis of secondary metabolites;ko01200//Carbon metabolism;ko00020//Citrate cycle (TCA cycle)	K00164;K00164;K00164;K00164	-	-	-
Unigene0001666	22.363	5.397	6.477	3.813	21.173	5.687	7.277	2.867	9DC3	LRR receptor-like serine/threonine-protein kinase EFR [Salvia splendens]	-	-	-	-	-	-	GO:0009719//response to endogenous stimulus;GO:0009987//cellular process;GO:0010033//response to organic substance;GO:0044699//single-organism process;GO:0051707//response to other organism
Unigene0001667	33.217	13.55	26.18	24.973	21.377	12.893	27.703	19.82	FDH1	formate dehydrogenase, mitochondrial [Olea europaea var. sylvestris] [Olea europaea]	Metabolism;Metabolism;Metabolism	Global and overview maps;Global and overview maps;Carbohydrate metabolism	ko01100//Metabolic pathways;ko01200//Carbon metabolism;ko00630//Glyoxylate and dicarboxylate metabolism	K00122;K00122;K00122	GO:0009536//plastid	GO:0000166//nucleotide binding;GO:0016614//oxidoreductase activity, acting on CH-OH group of donors;GO:0016620//oxidoreductase activity, acting on the aldehyde or oxo group of donors, NAD or NADP as acceptor	GO:0006950//response to stress;GO:0010038//response to metal ion;GO:0044710//single-organism metabolic process
Unigene0001668	0.46	9.053	4.147	0.273	1.747	3.593	1.403	3.933	SETD2	SET domain-containing protein-like [Oryza sativa Japonica Group]	-	-	-	-	GO:0043231//intracellular membrane-bounded organelle	GO:0018024//histone-lysine N-methyltransferase activity	GO:0001763//morphogenesis of a branching structure;GO:0009909//regulation of flower development;GO:0010468//regulation of gene expression;GO:0016108//tetraterpenoid metabolic process;GO:0031058//positive regulation of histone modification;GO:0034968//histone lysine methylation;GO:0043067//regulation of programmed cell death;GO:0048229//gametophyte development
Unigene0001669	0.067	4.027	0.657	0.083	0.487	0.91	0.213	0.737	aex-3	MAP kinase-activating death domain protein-like [Rhodamnia argentea]	-	-	-	-	-	-	-
Unigene0001670	7.69	5.257	7.213	6.777	5.6	5.03	6.767	5.503	MNS5	ER degradation enhancer, mannosidase alpha-like 1 [Salvia splendens]	Genetic Information Processing	Folding, sorting and degradation	ko04141//Protein processing in endoplasmic reticulum	K10084	GO:0031090//organelle membrane;GO:0031224//intrinsic component of membrane;GO:0043231//intracellular membrane-bounded organelle	GO:0016787//hydrolase activity;GO:0046872//metal ion binding	GO:0000278//mitotic cell cycle;GO:0006464//cellular protein modification process
Unigene0001671	16.917	5.893	12.85	13.393	7.417	8.943	6.167	7.62	--	Stress up-regulated Nod 19 protein [Actinidia chinensis var. chinensis] [Actinidia chinensis]	-	-	-	-	-	-	-
Unigene0001672	0.303	0	0.4	0.653	0.343	0.05	0.053	0.98	--	-	-	-	-	-	-	-	-
Unigene0001673	0.347	7.95	2.3	0.173	0.68	2.843	0.873	1.127	BPM3	PREDICTED: BTB/POZ and MATH domain-containing protein 3 isoform X2 [Brassica oleracea var. oleracea] [Brassica oleracea]	-	-	-	-	-	-	-
Unigene0001674	50.66	32.78	40.26	34.203	39.077	23.153	44.73	29.92	ILK1	serine/threonine-protein kinase STY46 [Sesamum indicum]	-	-	-	-	GO:0043231//intracellular membrane-bounded organelle;GO:0044444//cytoplasmic part	GO:0004713//protein tyrosine kinase activity;GO:0032550//purine ribonucleoside binding	GO:0006468//protein phosphorylation;GO:0006605//protein targeting;GO:0006952//defense response;GO:0006972//hyperosmotic response;GO:0009620//response to fungus;GO:0009863//salicylic acid mediated signaling pathway;GO:0010051//xylem and phloem pattern formation;GO:0010646//regulation of cell communication;GO:0035556//intracellular signal transduction;GO:0043067//regulation of programmed cell death…
Unigene0001675	0.03	3.313	0.283	0.017	0.18	0.53	0.07	0.24	--	-	-	-	-	-	-	-	-
Unigene0001676	0.743	11.38	5.403	0.687	4.903	5.957	1.97	8.773	ACSL1	peroxisome Long-Chain Acyl-CoA Synthetase [Klebsormidium nitens]	Metabolism;Metabolism;Cellular Processes;Metabolism;Metabolism	Global and overview maps;Global and overview maps;Transport and catabolism;Lipid metabolism;Lipid metabolism	ko01100//Metabolic pathways;ko01212//Fatty acid metabolism;ko04146//Peroxisome;ko00071//Fatty acid degradation;ko00061//Fatty acid biosynthesis	K01897;K01897;K01897;K01897;K01897	GO:0042579//microbody	GO:0015645//fatty acid ligase activity	GO:0000302//response to reactive oxygen species;GO:0006631//fatty acid metabolic process
Unigene0001677	12.053	0.857	6.137	2.197	7.91	1.113	6.277	1.387	SRT2	NAD-dependent deacetylase sirtuin 4 [Salvia splendens]	Metabolism;Metabolism	Global and overview maps;Metabolism of cofactors and vitamins	ko01100//Metabolic pathways;ko00760//Nicotinate and nicotinamide metabolism	K11414;K11414	GO:0043234//protein complex;GO:0044429//mitochondrial part	GO:0033558//protein deacetylase activity;GO:0043168//anion binding;GO:0046914//transition metal ion binding	GO:0006486//protein glycosylation;GO:0006952//defense response;GO:0009617//response to bacterium;GO:0016458//gene silencing;GO:0035601//protein deacylation
Unigene0001678	7.803	19.257	7.073	5.56	14.303	1.773	2.24	7.437	BCA4	carbonic anhydrase [Salvia splendens]	Metabolism;Metabolism	Global and overview maps;Energy metabolism	ko01100//Metabolic pathways;ko00910//Nitrogen metabolism	K01673;K01673	GO:0005576//extracellular region;GO:0009526//plastid envelope;GO:0009532//plastid stroma;GO:0016020//membrane;GO:0044434//chloroplast part	GO:0016836//hydro-lyase activity;GO:0046914//transition metal ion binding	GO:0006089//lactate metabolic process;GO:0006091//generation of precursor metabolites and energy;GO:0006605//protein targeting;GO:0006739//NADP metabolic process;GO:0009617//response to bacterium;GO:0009696//salicylic acid metabolic process;GO:0009755//hormone-mediated signaling pathway;GO:0009863//salicylic acid mediated signaling pathway;GO:0010243//response to organonitrogen compound;GO:001037…
Unigene0001679	0.153	4.403	2.57	0.153	1.103	1.967	0.933	2.327	--	-	-	-	-	-	-	-	-
Unigene0001680	19.423	16.35	17.697	18.043	18.113	12.677	21.137	16.17	--	BAH domain protein [Handroanthus impetiginosus]	-	-	-	-	-	-	-
Unigene0001681	0.363	0.617	0.12	0.023	0.133	0.88	0	0.08	--	-	-	-	-	-	-	-	-
Unigene0001682	10.753	10.103	10.893	9.873	8.47	6.27	11.447	8.377	--	Agenet domain-containing protein [Prunus dulcis]	-	-	-	-	-	-	-
Unigene0001683	0.453	8.163	2.927	0.237	1.977	3.45	1.39	4.24	Ank3	ankyrin-3-like [Rhodamnia argentea]	-	-	-	-	-	-	-
Unigene0001684	0.13	5.263	1.343	0.107	1.117	1.697	0.557	2.56	ANK2	ankyrin-3-like [Rhodamnia argentea]	-	-	-	-	-	-	-
Unigene0001685	2.943	7.367	20.133	1.117	8.433	13.84	1.66	25.007	--	-	-	-	-	-	-	-	-
Unigene0001686	1.763	0.44	1.743	0.903	1.57	0.963	1.29	0.86	--	-	-	-	-	-	-	-	-
Unigene0001687	7.043	2.08	9.967	9.467	7.773	3.343	3.14	8.577	--	-	-	-	-	-	-	-	-
Unigene0001688	3.007	0.333	5.73	2.257	1.213	0.253	5.133	1.857	--	Dymeclin [Corchorus capsularis]	-	-	-	-	-	-	-
Unigene0001689	0.08	2.63	1.05	0.08	0.203	0.54	0.477	0.737	TJP3	disks large homolog 2-like [Rhodamnia argentea]	-	-	-	-	-	-	-
Unigene0001690	0.41	10.75	6.107	0.427	2.54	5.49	1.923	5.087	bicd-1	protein bicaudal D-like [Rhodamnia argentea]	-	-	-	-	-	-	-
Unigene0001691	0.333	6.78	3.75	0.18	0.66	2.05	0.623	2.12	CBG18087	PREDICTED: tRNA wybutosine-synthesizing protein 4 [Cucumis melo]	-	-	-	-	-	-	-
Unigene0001692	59.243	28.72	39.563	39.51	41.367	18.023	45.883	33.28	SGT1	suppressor of G2 allele of SKP1 [Salvia splendens]	Organismal Systems	Environmental adaptation	ko04626//Plant-pathogen interaction	K12795	GO:0031461//cullin-RING ubiquitin ligase complex;GO:0043231//intracellular membrane-bounded organelle;GO:0044444//cytoplasmic part	GO:0005488//binding	GO:0006605//protein targeting;GO:0009617//response to bacterium;GO:0009696//salicylic acid metabolic process;GO:0009755//hormone-mediated signaling pathway;GO:0009817//defense response to fungus, incompatible interaction;GO:0009863//salicylic acid mediated signaling pathway;GO:0010029//regulation of seed germination;GO:0010243//response to organonitrogen compound;GO:0019941//modification-dependen…
Unigene0001693	3.327	0.417	2.283	3.003	4	0.607	2.577	2.43	--	protein ALP1-like [Coffea eugenioides]	-	-	-	-	-	-	-
Unigene0001694	0.42	8.59	2.323	0.217	1.227	2.277	0.6	1.84	AP3D1	mBLVR [Capsaspora owczarzaki ATCC 30864]	-	-	-	-	GO:0044424//intracellular part	GO:0005488//binding	GO:0007033//vacuole organization;GO:0015031//protein transport;GO:0016192//vesicle-mediated transport;GO:0044699//single-organism process;GO:0046907//intracellular transport
Unigene0001695	0.96	0.24	1.153	1.13	1.39	0.467	1.46	0.843	--	-	-	-	-	-	-	-	-
Unigene0001696	7.277	5.57	6.48	7.323	7.193	5.407	6.333	6.153	--	diacylglycerol kinase (ATP) [Salvia splendens]	-	-	-	-	-	GO:0005488//binding	-
Unigene0001697	18.047	5.583	12.543	25.377	17.087	6.21	13.563	25.52	Tbc1d9b	Ypt/Rab GTPase activating protein [Handroanthus impetiginosus]	-	-	-	-	GO:0009536//plastid	-	-
Unigene0001698	0.543	5.267	3.797	0.173	0.93	2.293	0.84	2.477	MBTPS2	Membrane-bound transcription factor site-2 protease-like [Porphyridium purpureum]	Genetic Information Processing	Folding, sorting and degradation	ko04141//Protein processing in endoplasmic reticulum	K07765	-	-	-
Unigene0001699	5.213	2.853	4.177	2.92	2.9	1.523	4.163	2.087	PCMP-H61	pentatricopeptide repeat protein [Salvia miltiorrhiza]	-	-	-	-	-	-	-
Unigene0001700	0	9.417	14.187	0	0	14.05	27.793	0.027	--	U-box domain-containing protein 4-like [Olea europaea var. sylvestris] [Olea europaea]	-	-	-	-	-	GO:0003824//catalytic activity	GO:0006970//response to osmotic stress;GO:0006996//organelle organization
Unigene0001701	24.34	20.11	25.21	24.887	22.86	16.993	30.82	22.63	At4g12770	PREDICTED: auxilin-related protein 2-like [Erythranthe guttata]	-	-	-	-	GO:0005737//cytoplasm	-	-
Unigene0001702	1.803	1.723	2.457	1.487	1.267	1.1	1.533	1.36	--	-	-	-	-	-	-	-	-
Unigene0001703	7.603	3.167	4.143	5.773	6.39	1.557	2.237	1.927	RIPK	Serine/threonine protein kinase [Handroanthus impetiginosus]	-	-	-	-	-	GO:0004713//protein tyrosine kinase activity;GO:0032550//purine ribonucleoside binding	GO:0006468//protein phosphorylation
Unigene0001704	10.51	5.057	6.717	6.19	5.353	2.343	6.453	4.54	IPMSB	2-isopropylmalate synthase [Salvia splendens]	Metabolism;Metabolism;Metabolism;Metabolism;Metabolism;Metabolism	Global and overview maps;Global and overview maps;Global and overview maps;Carbohydrate metabolism;Global and overview maps;Amino acid metabolism	ko01100//Metabolic pathways;ko01110//Biosynthesis of secondary metabolites;ko01230//Biosynthesis of amino acids;ko00620//Pyruvate metabolism;ko01210//2-Oxocarboxylic acid metabolism;ko00290//Valine, leucine and isoleucine biosynthesis	K01649;K01649;K01649;K01649;K01649;K01649	GO:0009526//plastid envelope	GO:0046912//transferase activity, transferring acyl groups, acyl groups converted into alkyl on transfer	GO:0006551//leucine metabolic process
Unigene0001705	38.11	19.987	27.47	32.187	25.867	15.127	22.303	21.63	WIN2	protein phosphatase 1L [Salvia splendens]	-	-	-	-	GO:0005576//extracellular region	GO:0004721//phosphoprotein phosphatase activity;GO:0043169//cation binding	GO:0000904//cell morphogenesis involved in differentiation;GO:0006464//cellular protein modification process;GO:0009664//plant-type cell wall organization
Unigene0001706	3.06	1.263	3.89	5.09	2.99	1.38	3.037	4.07	ABCA1	pentatricopeptide repeat protein [Salvia miltiorrhiza]	Environmental Information Processing	Membrane transport	ko02010//ABC transporters	K05643	-	-	-
Unigene0001707	7.48	2.537	8.35	4.79	6.207	4.977	11.3	4.087	At1g30920	F-box protein At3g07870-like [Sesamum indicum]	-	-	-	-	-	-	-
Unigene0001708	1.3	12.777	8.587	0.587	3.24	5.693	1.763	7.123	GPAT4	glycerol-3-phosphate acyltransferase 3-like [Rhodamnia argentea]	Metabolism;Metabolism;Metabolism;Metabolism	Global and overview maps;Global and overview maps;Lipid metabolism;Lipid metabolism	ko01100//Metabolic pathways;ko01110//Biosynthesis of secondary metabolites;ko00564//Glycerophospholipid metabolism;ko00561//Glycerolipid metabolism	K13506;K13506;K13506;K13506	GO:0016020//membrane;GO:0043231//intracellular membrane-bounded organelle	-	GO:0046486//glycerolipid metabolic process
Unigene0001709	0.84	0.083	7.563	0.803	1.017	0.117	12.86	0.76	--	hypothetical protein FNV43_RR18213 [Rhamnella rubrinervis]	-	-	-	-	-	-	-
Unigene0001710	57.577	70.937	50.343	54.973	58.287	13.567	36.483	40.577	SRC2	protein SRC2-like [Sesamum indicum]	-	-	-	-	GO:0044424//intracellular part	-	GO:0006820//anion transport;GO:0044763//single-organism cellular process;GO:0050789//regulation of biological process;GO:0050896//response to stimulus;GO:0071702//organic substance transport;GO:0071705//nitrogen compound transport;GO:1902582//single-organism intracellular transport
Unigene0001712	1.74	1.287	2.07	1.143	1.34	0.76	1.913	0.977	ABCG31	Pleiotropic drug resistance proteins (PDR1-15), ABC superfamily [Handroanthus impetiginosus]	-	-	-	-	-	GO:0015405//P-P-bond-hydrolysis-driven transmembrane transporter activity;GO:0017111//nucleoside-triphosphatase activity;GO:0036094//small molecule binding;GO:0097159//organic cyclic compound binding;GO:1901363//heterocyclic compound binding	GO:0044765//single-organism transport
Unigene0001713	0.497	6.337	3.807	0.293	1.39	2.687	1.05	2.84	PNPT1	polyribonucleotide nucleotidyltransferase [Klebsormidium nitens]	Genetic Information Processing	Folding, sorting and degradation	ko03018//RNA degradation	K00962	GO:0043231//intracellular membrane-bounded organelle	GO:0004527//exonuclease activity;GO:0016779//nucleotidyltransferase activity	GO:0000959//mitochondrial RNA metabolic process;GO:0044710//single-organism metabolic process;GO:0044763//single-organism cellular process;GO:0090305//nucleic acid phosphodiester bond hydrolysis
Unigene0001714	13.397	8.36	13.627	10.983	11.193	6.127	14.497	8.98	--	Bromodomain-containing protein [Actinidia chinensis var. chinensis] [Actinidia chinensis]	-	-	-	-	-	-	-
Unigene0001715	7.587	1.863	6.237	5.183	4.677	3.32	5.707	4.023	ELM1	PREDICTED: mitochondrial fission protein ELM1 [Erythranthe guttata]	-	-	-	-	GO:0031966//mitochondrial membrane	GO:0005488//binding	GO:0007005//mitochondrion organization
Unigene0001716	0.93	13.663	11.173	0.783	2.457	5.05	2.17	5.26	csn2	COP9 signalosome complex subunit 2-like [Rhodamnia argentea]	-	-	-	-	GO:0043231//intracellular membrane-bounded organelle;GO:0043234//protein complex;GO:0044444//cytoplasmic part	GO:0005488//binding	GO:0000338//protein deneddylation;GO:0007602//phototransduction;GO:0009057//macromolecule catabolic process;GO:0009639//response to red or far red light;GO:0044707//single-multicellular organism process
Unigene0001717	0.303	6.227	2.543	0.103	0.84	2.103	0.68	1.793	taf-1	transcription initiation factor TFIID subunit 1-like [Rhodamnia argentea]	Genetic Information Processing	Transcription	ko03022//Basal transcription factors	K03125	-	-	GO:0010467//gene expression;GO:0016070//RNA metabolic process;GO:0034645//cellular macromolecule biosynthetic process
Unigene0001718	0.963	9.35	6.59	0.273	1.743	4.57	1.553	3.47	saraf	store-operated calcium entry-associated regulatory factor precursor [Blastocystis sp. ATCC 50177/Nand II]	-	-	-	-	-	-	-
Unigene0001719	2.293	0	0.633	0.877	2.61	0.02	1.377	0.523	--	-	-	-	-	-	-	-	-
Unigene0001720	1.023	0.127	0.713	0.577	1.193	0.2	0.193	0.66	--	gag-pol polyprotein [Striga asiatica]	-	-	-	-	-	GO:0003824//catalytic activity	GO:0090304//nucleic acid metabolic process
Unigene0001721	0.21	0.667	0.94	0.19	0.507	0.723	0.163	0.863	GCNT3	-	-	-	-	-	-	-	-
Unigene0001722	2.417	0.033	0.743	0.16	2.063	0.17	0.963	0.137	--	pentatricopeptide repeat protein [Salvia miltiorrhiza]	-	-	-	-	GO:0043231//intracellular membrane-bounded organelle;GO:0044444//cytoplasmic part	GO:0005488//binding;GO:0016818//hydrolase activity, acting on acid anhydrides, in phosphorus-containing anhydrides	GO:0000097//sulfur amino acid biosynthetic process;GO:0006006//glucose metabolic process;GO:0006996//organelle organization;GO:0008380//RNA splicing;GO:0009408//response to heat;GO:0018205//peptidyl-lysine modification;GO:0044092//negative regulation of molecular function;GO:0051603//proteolysis involved in cellular protein catabolic process
Unigene0001723	1.053	10.793	6.563	0.613	4.553	4.613	1.927	6.397	Bm1_28595	clustered mitochondria protein homolog [Rhodamnia argentea]	-	-	-	-	-	-	-
Unigene0001724	0.43	6.213	2.663	0.14	1.32	2.573	0.853	2.733	scrib	erbin-like [Rhodamnia argentea]	-	-	-	-	-	GO:0016740//transferase activity	GO:0050794//regulation of cellular process
Unigene0001725	0.623	7.197	4.067	0.303	1.643	3.56	0.627	3.153	JHS1	DNA replication ATP-dependent helicase/nuclease DNA2 isoform X2 [Oryza sativa Japonica Group]	Genetic Information Processing	Replication and repair	ko03030//DNA replication	K10742	-	-	-
Unigene0001726	27.933	5.593	24.953	20.363	14.407	8.423	22.2	14.133	NPGR2	protein NPGR2 [Sesamum indicum]	-	-	-	-	GO:0043231//intracellular membrane-bounded organelle	GO:0003824//catalytic activity	-
Unigene0001727	0.247	2.63	1.483	0.077	0.303	1.037	0.157	1.203	--	-	-	-	-	-	-	-	-
Unigene0001728	6.507	3.71	8.337	5.777	6.02	3.7	6.29	5.287	--	guanyl-nucleotide exchange factors [Striga asiatica]	-	-	-	-	-	-	-
Unigene0001729	0.253	3.51	1.927	0.127	1.187	1.43	0.9	1.72	--	-	-	-	-	-	-	-	-
Unigene0001730	22.28	5.05	6.757	1.953	9.943	8.753	8.417	7.813	--	Natterin-3 like [Actinidia chinensis var. chinensis] [Actinidia chinensis]	-	-	-	-	-	-	-
Unigene0001731	0.693	9.613	4.953	0.447	2.397	3.673	1.343	4.487	atgl-1	Acyl transferase/acyl hydrolase/lysophospholipase [Nannochloropsis gaditana]	-	-	-	-	-	-	GO:0008152//metabolic process
Unigene0001732	0.267	3.02	2.133	0.313	0.66	1.227	0.553	1.347	BDP1	transcription factor [Galdieria sulphuraria]	-	-	-	-	-	-	-
Unigene0001733	4.767	3.4	4.74	3.277	9.703	2.02	3.163	2.497	At1g11300	G-type lectin S-receptor-like serine/threonine-protein kinase At1g11330 [Sesamum indicum]	-	-	-	-	-	GO:0016301//kinase activity	GO:0009987//cellular process
Unigene0001734	519	181.55	498.793	527.35	481.637	289.473	539.66	416.317	LOS1	elongation factor 2 [Syzygium oleosum]	-	-	-	-	GO:0030529//intracellular ribonucleoprotein complex	GO:0008135//translation factor activity, RNA binding;GO:0017111//nucleoside-triphosphatase activity;GO:0032550//purine ribonucleoside binding;GO:0070011//peptidase activity, acting on L-amino acid peptides	GO:0019941//modification-dependent protein catabolic process;GO:0034645//cellular macromolecule biosynthetic process
Unigene0001735	0.517	6.02	4.447	0.37	1.597	3.187	1.247	3.97	ina-1	integrin alpha-PS1-like [Rhodamnia argentea]	-	-	-	-	-	-	-
Unigene0001736	0.327	6.58	3.38	0.19	0.993	1.86	0.747	2.1	slc16a12	Monocarboxylate transporter 13 [Hondaea fermentalgiana]	-	-	-	-	-	-	-
Unigene0001737	0.9	0.63	0.593	1.29	0.803	0.3	0.747	0.963	--	CHD5-like protein [Gossypium australe]	-	-	-	-	-	-	GO:0045048//protein insertion into ER membrane
Unigene0001738	5.997	2.05	6.243	3.547	4.393	3.177	5.763	2.77	GLY1	glycerol-3-phosphate dehydrogenase (NAD+) [Salvia splendens]	Metabolism;Metabolism	Global and overview maps;Lipid metabolism	ko01110//Biosynthesis of secondary metabolites;ko00564//Glycerophospholipid metabolism	K00006;K00006	GO:0009526//plastid envelope	GO:0000166//nucleotide binding;GO:0016614//oxidoreductase activity, acting on CH-OH group of donors;GO:0048037//cofactor binding	GO:0003006//developmental process involved in reproduction;GO:0006072//glycerol-3-phosphate metabolic process;GO:0006644//phospholipid metabolic process;GO:0008610//lipid biosynthetic process;GO:0009814//defense response, incompatible interaction
Unigene0001739	5.71	2.613	4.537	3.527	4.31	1.7	3.883	2.947	HIT4	alpha/beta-glucosidase agdc [Gossypium arboreum]	-	-	-	-	-	-	-
Unigene0001740	13.873	4.277	10.327	6.267	21.89	5.09	13.493	15.737	ISPH	4-hydroxy-3-methylbut-2-enyl diphosphate reductase 2 [Salvia miltiorrhiza]	Metabolism;Metabolism;Metabolism	Global and overview maps;Global and overview maps;Metabolism of terpenoids and polyketides	ko01100//Metabolic pathways;ko01110//Biosynthesis of secondary metabolites;ko00900//Terpenoid backbone biosynthesis	K03527;K03527;K03527	GO:0009532//plastid stroma	GO:0016726//oxidoreductase activity, acting on CH or CH2 groups, NAD or NADP as acceptor;GO:0043169//cation binding;GO:0051536//iron-sulfur cluster binding;GO:0052592//oxidoreductase activity, acting on CH or CH2 groups, with an iron-sulfur protein as acceptor	GO:0006090//pyruvate metabolic process;GO:0006720//isoprenoid metabolic process;GO:0008654//phospholipid biosynthetic process;GO:0009636//response to toxic substance
Unigene0001741	0.48	6.223	2.713	0.33	0.8	1.857	0.877	1.627	SNIP1	smad nuclear interacting protein 1 [Capsaspora owczarzaki ATCC 30864]	-	-	-	-	GO:0009536//plastid	GO:0003676//nucleic acid binding;GO:0046872//metal ion binding	GO:0000377//RNA splicing, via transesterification reactions with bulged adenosine as nucleophile;GO:0003006//developmental process involved in reproduction;GO:0006305//DNA alkylation;GO:0006355//regulation of transcription, DNA-templated;GO:0006402//mRNA catabolic process;GO:0009409//response to cold;GO:0009639//response to red or far red light;GO:0009648//photoperiodism;GO:0009756//carbohydrate …
Unigene0001742	0.107	1.953	0.83	0	0.29	0.627	0.107	0.633	--	-	-	-	-	-	-	-	-
Unigene0001743	0.21	2.647	1.01	0.023	0.513	0.74	0.307	0.54	At2g30600/At2g30610	PREDICTED: BTB/POZ domain-containing protein At1g21780 [Tarenaya hassleriana]	-	-	-	-	GO:0005623//cell	-	GO:0007275//multicellular organism development;GO:0009987//cellular process
Unigene0001744	0	0.613	7.933	0.057	0	0.727	7.537	0	RPP8L2	Apoptotic ATPase [Handroanthus impetiginosus]	-	-	-	-	-	-	-
Unigene0001745	29.447	4.783	27.827	32.22	13.7	13.75	5.04	15.003	R1B-12	NBS-LRR type resistance protein [Striga asiatica]	-	-	-	-	-	-	-
Unigene0001746	6.853	2.783	10.553	7.037	11.113	3.333	15.367	5.48	RPP13L3	Apoptotic ATPase [Handroanthus impetiginosus]	-	-	-	-	-	-	-
Unigene0001747	194.263	34.71	107.463	142.397	74.33	82.827	16.81	65.33	R1B-12	NBS-LRR type resistance protein [Striga asiatica]	-	-	-	-	-	-	-
Unigene0001748	0	0	5.233	0	0	0	0	0	R1A-10	Apoptotic ATPase [Handroanthus impetiginosus]	-	-	-	-	-	-	-
Unigene0001749	1.023	11.397	7.46	0.847	3.5	5.757	2.003	6.737	ABCB9	ATP-binding cassette sub-family B member 9 [Micractinium conductrix]	Environmental Information Processing	Membrane transport	ko02010//ABC transporters	K05656	GO:0005773//vacuole;GO:0009536//plastid;GO:0031090//organelle membrane;GO:0043234//protein complex;GO:0044446//intracellular organelle part	GO:0032550//purine ribonucleoside binding;GO:0042626//ATPase activity, coupled to transmembrane movement of substances	GO:0042221//response to chemical;GO:0044763//single-organism cellular process;GO:0044765//single-organism transport
Unigene0001750	13.78	5.36	14.147	8.833	13.927	6.867	12.883	7.37	--	ditrans,polycis-polyprenyl diphosphate synthase [Salvia splendens]	Metabolism;Metabolism	Global and overview maps;Metabolism of terpenoids and polyketides	ko01110//Biosynthesis of secondary metabolites;ko00900//Terpenoid backbone biosynthesis	K11778;K11778	-	GO:0016765//transferase activity, transferring alkyl or aryl (other than methyl) groups	GO:0006950//response to stress;GO:0008152//metabolic process;GO:0009628//response to abiotic stimulus;GO:0044763//single-organism cellular process
Unigene0001751	3.423	0	0.053	0	1.107	0	0	0	--	universal stress protein 5 [Salvia miltiorrhiza]	-	-	-	-	-	-	-
Unigene0001752	3.01	2.643	3.99	4.007	3.323	2.23	2.513	4.233	SOC1	agamous-like MADS-box protein AGL19 [Sesamum indicum]	-	-	-	-	GO:0043231//intracellular membrane-bounded organelle	GO:0001071//nucleic acid binding transcription factor activity;GO:0003676//nucleic acid binding;GO:0005515//protein binding	GO:0001101//response to acid chemical;GO:0006355//regulation of transcription, DNA-templated;GO:0006886//intracellular protein transport;GO:0009409//response to cold;GO:0009909//regulation of flower development;GO:0010074//maintenance of meristem identity;GO:0043479//pigment accumulation in tissues in response to UV light;GO:0048437//floral organ development
Unigene0001753	0.2	6.18	2.403	0.15	0.897	1.75	0.703	1.743	daf-2	insulin-like receptor [Rhodamnia argentea]	Environmental Information Processing;Environmental Information Processing	Signal transduction;Signal transduction	ko04016//MAPK signaling pathway - plant;ko04075//Plant hormone signal transduction	K14510;K14510	-	GO:0004672//protein kinase activity	GO:0006464//cellular protein modification process;GO:0016310//phosphorylation
Unigene0001754	8.073	7.663	4.873	5.397	7.09	3.363	4.967	4.793	--	Phosphoprotein phosphatase [Handroanthus impetiginosus]	-	-	-	-	-	-	-
Unigene0001755	0.72	7.897	7.76	0.84	2.123	3.383	1.38	5.787	glt-1	dicarboxylate/amino acid cation sodium transporter [Chlamydomonas reinhardtii]	-	-	-	-	-	-	-
Unigene0001756	0.537	15.64	4.65	0.067	1.23	3.31	0.943	2.427	--	-	-	-	-	-	-	-	-
Unigene0001757	1.09	11.343	8.027	0.343	2.86	5.957	1.413	6.73	algn-12	dol-P-Man:Man(7)GlcNAc(2)-PP-Dol alpha-1,6-mannosyltransferase isoform X5 [Carex littledalei]	Metabolism;Metabolism;Metabolism	Global and overview maps;Glycan biosynthesis and metabolism;Glycan biosynthesis and metabolism	ko01100//Metabolic pathways;ko00510//N-Glycan biosynthesis;ko00513//Various types of N-glycan biosynthesis	K03847;K03847;K03847	-	GO:0000030//mannosyltransferase activity	GO:0006486//protein glycosylation
Unigene0001758	0.507	5.877	3.893	0.18	2.323	4.217	1.073	4.293	--	Proteasome activator complex subunit 3 [Hondaea fermentalgiana]	-	-	-	-	-	-	-
Unigene0001759	0.833	10.517	5.54	0.323	2.383	4.343	1.517	5.133	wago-1	protein argonaute 5 isoform X2 [Prunus persica]	-	-	-	-	GO:0044424//intracellular part	GO:0005488//binding	GO:0006259//DNA metabolic process;GO:0006351//transcription, DNA-templated;GO:0006950//response to stress;GO:0009908//flower development;GO:0016441//posttranscriptional gene silencing;GO:0016570//histone modification;GO:0019219//regulation of nucleobase-containing compound metabolic process;GO:0031047//gene silencing by RNA;GO:0048513//animal organ development;GO:0051716//cellular response to sti…
Unigene0001760	0.367	4.753	3.067	0.29	1.023	1.96	0.78	2.16	VPS35	vacuolar protein sorting-associated protein Vps35 [Capsaspora owczarzaki ATCC 30864]	Cellular Processes	Transport and catabolism	ko04144//Endocytosis	K18468	GO:0005737//cytoplasm;GO:0012505//endomembrane system	-	-
Unigene0001761	0.457	8.9	3.927	0.49	2.053	4.083	2.057	5.28	--	-	-	-	-	-	-	-	-
Unigene0001762	14.543	12.803	16.8	8.747	9.377	2.393	5.443	3.76	HSFB3	heat shock transcription factor, other eukaryote [Salvia splendens]	-	-	-	-	GO:0043231//intracellular membrane-bounded organelle	GO:0001071//nucleic acid binding transcription factor activity;GO:0003677//DNA binding	GO:0006950//response to stress;GO:0009404//toxin metabolic process;GO:0010038//response to metal ion;GO:0010468//regulation of gene expression;GO:0034645//cellular macromolecule biosynthetic process;GO:0051301//cell division
Unigene0001763	0.563	8.097	5.29	0.233	1.707	3.32	1.103	3.89	--	PREDICTED: protein SHOOT GRAVITROPISM 6 isoform X1 [Tarenaya hassleriana]	-	-	-	-	-	-	-
Unigene0001764	3.7	70.013	4.117	3.69	7.627	1.593	4.82	2.903	At5g44440	berberine bridge enzyme-like 18 [Sesamum indicum]	-	-	-	-	-	GO:0016614//oxidoreductase activity, acting on CH-OH group of donors	-
Unigene0001765	6.537	2.703	3.51	5.32	4.693	2.997	4.197	3.667	--	15 kDa selenoprotein [Striga asiatica]	-	-	-	-	GO:0044424//intracellular part	GO:0001871//pattern binding;GO:0004672//protein kinase activity;GO:0005515//protein binding;GO:0032550//purine ribonucleoside binding;GO:0046872//metal ion binding	GO:0006464//cellular protein modification process;GO:0006796//phosphate-containing compound metabolic process
Unigene0001766	3.237	2.427	2.813	7.507	2.657	2.057	2.997	4.403	--	transposase, Tnp1/En/Spm-like protein [Artemisia annua]	-	-	-	-	-	-	-
Unigene0001767	14.14	9.077	12.797	12.25	20.503	8.843	12.55	10.337	--	DNA (cytosine-5)-methyltransferase 3A [Salvia splendens]	-	-	-	-	-	-	-
Unigene0001768	13.43	7.86	14.963	11.623	11.413	7.957	14.57	11.313	VIP2	CCR4-NOT transcription complex subunit 2 [Salvia splendens]	Genetic Information Processing	Folding, sorting and degradation	ko03018//RNA degradation	K12605	GO:0043231//intracellular membrane-bounded organelle	GO:0005488//binding	GO:0006259//DNA metabolic process;GO:0010468//regulation of gene expression;GO:0034645//cellular macromolecule biosynthetic process
Unigene0001769	16.003	36.783	12.5	10.247	7.713	7.72	10.33	6.787	ATP23	mitochondrial inner membrane protease ATP23 [Salvia splendens]	-	-	-	-	GO:0009536//plastid	GO:0016787//hydrolase activity	GO:0019538//protein metabolic process
Unigene0001770	15.67	11.543	14.96	15.047	11.5	8.823	14.703	11.853	RUS1	protein root UVB sensitive 1, chloroplastic isoform X1 [Sesamum indicum]	-	-	-	-	GO:0009526//plastid envelope	-	GO:0009411//response to UV
Unigene0001771	0.19	0	3.567	0	0	0	3.953	0	--	-	-	-	-	-	-	-	-
Unigene0001772	0.127	1.067	0	0.113	0.183	0.483	0.057	0.127	--	-	-	-	-	-	-	-	-
Unigene0001773	3.737	0.483	0.4	0.33	1.557	0.257	0.267	0.19	--	Zinc knuckle CX2CX4HX4C [Trema orientale]	-	-	-	-	-	-	-
Unigene0001774	0.34	5.627	3.623	0.163	0.643	1.987	0.667	1.55	--	-	-	-	-	-	-	-	-
Unigene0001775	0.697	4.673	3.403	0.35	1.987	1.87	0.723	4.3	inx-10	innexin inx2-like [Rhodamnia argentea]	-	-	-	-	-	-	-
Unigene0001776	0.36	4.01	2.267	0.127	1.11	2.02	0.54	2.04	--	-	-	-	-	-	-	-	-
Unigene0001777	1.977	1.22	0.37	0.017	0.88	0.177	0.003	0.037	pol	ribonuclease H [Trifolium pratense]	-	-	-	-	-	-	-
Unigene0001778	4.553	36.49	27.647	3.863	23.933	27.663	14.817	36.047	CNDP2	glutamate carboxypeptidase [Capsaspora owczarzaki ATCC 30864]	Metabolism;Metabolism	Global and overview maps;Metabolism of other amino acids	ko01100//Metabolic pathways;ko00480//Glutathione metabolism	K15428;K15428	-	GO:0016787//hydrolase activity	GO:0008152//metabolic process
Unigene0001779	10.957	1.65	0.007	0	6.147	2.933	0.007	0	pol	Ribonuclease H2 subunit A [Hibiscus syriacus]	-	-	-	-	-	-	-
Unigene0001780	0.133	4.427	1.137	0.063	0.55	1.013	0.527	1.1	Oatp74D	solute carrier organic anion transporter family member 74D-like [Rhodamnia argentea]	-	-	-	-	-	-	-
Unigene0001781	1.287	1.41	8.36	1.217	1.213	1.52	1.24	1.8	At5g07610	F-box protein At5g07610-like [Sesamum indicum]	-	-	-	-	-	-	-
Unigene0001782	5.533	1.84	3.75	4.183	10.88	1.633	2.433	1.767	WAKL1	large subunit ribosomal protein L13Ae [Salvia splendens]	-	-	-	-	-	GO:0004672//protein kinase activity;GO:0005488//binding	GO:0016310//phosphorylation
Unigene0001783	1	12.627	2.487	1.3	0.597	0.46	0.423	0.437	--	copia protein (gag-int-pol protein) [Trifolium pratense]	-	-	-	-	-	-	-
Unigene0001784	0.367	5.497	3.957	0.357	1.367	2.7	1.077	3.557	SH2D4B	myosin IIIA, variant [Capsaspora owczarzaki ATCC 30864]	-	-	-	-	-	-	-
Unigene0001785	1.197	44.373	5.18	0.127	3.433	8.12	3.18	3.293	mup-2	troponin T, skeletal muscle-like [Rhodamnia argentea]	-	-	-	-	-	-	-
Unigene0001786	0.87	11.287	4.657	0.29	1.807	4.057	1.503	3.65	Mboat2	PREDICTED: lysophospholipid acyltransferase 1 [Fragaria vesca subsp. vesca] [Fragaria vesca]	Metabolism;Metabolism;Metabolism;Metabolism;Metabolism	Global and overview maps;Global and overview maps;Lipid metabolism;Lipid metabolism;Lipid metabolism	ko01100//Metabolic pathways;ko01110//Biosynthesis of secondary metabolites;ko00564//Glycerophospholipid metabolism;ko00561//Glycerolipid metabolism;ko00565//Ether lipid metabolism	K13519;K13519;K13519;K13519;K13519	-	-	-
Unigene0001787	0.417	5.02	3.167	0.317	0.943	1.887	0.637	2.25	CDC6	origin recognition complex subunit 1-like [Quercus suber]	-	-	-	-	GO:0043229//intracellular organelle	GO:0097159//organic cyclic compound binding;GO:1901363//heterocyclic compound binding	GO:0009987//cellular process;GO:0010467//gene expression;GO:0044699//single-organism process
Unigene0001788	0.477	0.55	1.607	0.817	0.683	0.77	1.317	0.667	--	-	-	-	-	-	-	-	-
Unigene0001789	25.14	15.37	28.683	29.647	23.86	28.43	43.593	28.487	At4g06599	TFIIF-interacting CTD phosphatase, including NLI-interacting factor [Handroanthus impetiginosus]	-	-	-	-	GO:0043231//intracellular membrane-bounded organelle	GO:0003824//catalytic activity	GO:0006796//phosphate-containing compound metabolic process
Unigene0001790	2.713	2.19	4.96	3.147	2.11	3.067	4.26	2.473	Alg14	PREDICTED: UDP-N-acetylglucosamine transferase subunit ALG14 homolog [Ipomoea nil]	Metabolism;Metabolism;Metabolism	Global and overview maps;Glycan biosynthesis and metabolism;Glycan biosynthesis and metabolism	ko01100//Metabolic pathways;ko00510//N-Glycan biosynthesis;ko00513//Various types of N-glycan biosynthesis	K07441;K07441;K07441	-	GO:0003824//catalytic activity	-
Unigene0001791	8.437	0.71	2.453	8.24	9.297	1	3.943	8.793	--	PREDICTED: auxin-responsive protein IAA2-like [Erythranthe guttata]	-	-	-	-	-	-	-
Unigene0001792	2.93	1.863	1.537	1.387	1.8	0.367	1.083	0.973	--	ABC transporter G family member 11 [Capsicum chinense]	-	-	-	-	-	-	-
Unigene0001793	0.41	0.32	0.65	1.257	0.47	0.107	0.543	0.92	--	1,2-dihydroxy-3-keto-5-methylthiopentene dioxygenase 4 [Capsicum annuum]	-	-	-	-	-	-	-
Unigene0001794	5.58	0.12	1.487	2.283	5.107	0.61	4.193	4.197	At2g25060	PREDICTED: stellacyanin [Erythranthe guttata]	-	-	-	-	GO:0043231//intracellular membrane-bounded organelle	-	-
Unigene0001795	0.61	7.473	3.667	0.323	1.683	3.347	0.917	2.6	Esf1	pre-rRNA-processing protein esf1 [Cucurbita moschata]	-	-	-	-	-	-	-
Unigene0001796	0.083	3.777	0.63	0.007	0.42	0.787	0.257	0.567	Ttn	neuroglian-like [Rhodamnia argentea]	-	-	-	-	-	-	-
Unigene0001797	21.883	9.333	25.343	17.34	17.787	10.307	26.977	16.203	abhd17c	protein ABHD17B [Sesamum indicum]	-	-	-	-	-	GO:0003824//catalytic activity	GO:0000097//sulfur amino acid biosynthetic process;GO:0042127//regulation of cell proliferation
Unigene0001798	1.313	0.753	0.063	4.637	4.793	0.453	0.027	2.94	--	PREDICTED: F-box protein At3g07870 [Theobroma cacao]	-	-	-	-	-	-	-
Unigene0001799	0.283	5.053	2.26	0.177	0.87	1.767	0.523	1.637	--	hypothetical protein E3N88_35068 [Mikania micrantha]	-	-	-	-	-	-	-
Unigene0001800	9.577	9.967	17.127	10.61	7.793	6.76	12.003	7.357	WDR25	WD repeat-containing protein 25 [Sesamum indicum]	-	-	-	-	GO:0031461//cullin-RING ubiquitin ligase complex	-	-
Unigene0001801	1.597	6.177	4.97	0.503	4.27	6.413	2.57	7.93	NAGA	glycoside hydrolase 27 [Blastocystis sp. ATCC 50177/Nand II]	Metabolism;Metabolism;Metabolism;Metabolism;Metabolism	Global and overview maps;Lipid metabolism;Carbohydrate metabolism;Lipid metabolism;Glycan biosynthesis and metabolism	ko01100//Metabolic pathways;ko00561//Glycerolipid metabolism;ko00052//Galactose metabolism;ko00600//Sphingolipid metabolism;ko00603//Glycosphingolipid biosynthesis - globo and isoglobo series	K01189;K01189;K01189;K01189;K01189	-	GO:0004553//hydrolase activity, hydrolyzing O-glycosyl compounds	GO:0044238//primary metabolic process;GO:0044763//single-organism cellular process
Unigene0001802	0.32	5.703	3.027	0.26	1.18	2.267	0.703	2.153	--	-	-	-	-	-	-	-	-
Unigene0001803	1.353	15.637	10.303	0.993	3.557	7.22	3.183	8.793	atl	atlastin-3-like [Rhodamnia argentea]	-	-	-	-	-	-	-
Unigene0001804	0.283	5.273	3.15	0.17	1.053	1.82	0.847	2.097	--	-	-	-	-	-	-	-	-
Unigene0001805	0.407	7.457	5.197	0.363	1.803	3.667	2.277	2.71	Max	max protein [Capsaspora owczarzaki ATCC 30864]	-	-	-	-	-	-	-
Unigene0001806	0.203	5.493	0.51	0.05	0.38	1.187	0.28	0.55	nhr-3	steroid hormone receptor ERR2-like [Rhodamnia argentea]	-	-	-	-	-	-	-
Unigene0001807	2.93	1.05	3.71	2.3	2.007	0.953	2.19	1.483	metl	PREDICTED: methyltransferase-like protein 6 [Erythranthe guttata]	-	-	-	-	-	-	-
Unigene0001808	0.52	8.027	4.26	0.203	1.7	3.237	0.993	2.987	W08D2.5	probable cation-transporting ATPase 13A3 [Rhodamnia argentea]	-	-	-	-	GO:0016020//membrane;GO:0044424//intracellular part	-	GO:0006812//cation transport;GO:0044707//single-multicellular organism process;GO:0044763//single-organism cellular process;GO:0044767//single-organism developmental process
Unigene0001809	2.603	28.76	17.397	1.193	10.19	19.437	5.913	23.017	LDLR	low-density lipoprotein receptor-related protein 2-like [Rhodamnia argentea]	-	-	-	-	-	-	-
Unigene0001810	3.817	1.877	4.413	4.053	3.207	1.903	3.867	3.51	TFB1-1	transcription initiation factor TFIIH subunit 1 [Salvia splendens]	Genetic Information Processing;Genetic Information Processing	Replication and repair;Transcription	ko03420//Nucleotide excision repair;ko03022//Basal transcription factors	K03141;K03141	-	-	GO:0044260//cellular macromolecule metabolic process;GO:0090304//nucleic acid metabolic process
Unigene0001811	0.53	7.17	5.89	0.243	1.883	3.023	0.97	2.963	ptcd3	pentatricopeptide repeat domain-containing protein 3, mitochondrial-like [Rhodamnia argentea]	-	-	-	-	-	-	-
Unigene0001812	0.857	7.293	3.647	0.763	2.087	2.393	1.86	2.723	LSM3	U6 snRNA-associated Sm-like protein LSm3 [Carex littledalei]	Genetic Information Processing;Genetic Information Processing	Transcription;Folding, sorting and degradation	ko03040//Spliceosome;ko03018//RNA degradation	K12622;K12622	GO:0030529//intracellular ribonucleoprotein complex;GO:0043231//intracellular membrane-bounded organelle;GO:0043232//intracellular non-membrane-bounded organelle;GO:0044444//cytoplasmic part	-	GO:0009451//RNA modification
Unigene0001813	0.69	7.847	6.357	0.49	1.86	4.457	1.173	4.58	Slc28a2	Sodium/nucleoside cotransporter [Emiliania huxleyi CCMP1516]	-	-	-	-	-	-	-
Unigene0001814	0.983	10.127	3.42	0.4	1.667	3.5	0.667	2.607	F35D11.3	Transmembrane and coiled-coil domain-containing protein 4 [Ananas comosus]	-	-	-	-	-	-	-
Unigene0001815	1.297	7.28	4.257	0.387	6.533	8.477	2.503	11.277	ACP7	acid phosphatase type 7-like [Rhodamnia argentea]	-	-	-	-	GO:0044444//cytoplasmic part	GO:0016791//phosphatase activity	GO:0008152//metabolic process
Unigene0001816	0.053	2.503	12.113	0.017	0.057	3.83	24.77	0.09	GTE7	Transcription initiation factor TFIID, subunit BDF1 [Handroanthus impetiginosus]	-	-	-	-	GO:0043231//intracellular membrane-bounded organelle	GO:0016740//transferase activity	GO:0009292//genetic transfer;GO:0010467//gene expression;GO:0034645//cellular macromolecule biosynthetic process;GO:0044238//primary metabolic process;GO:0044763//single-organism cellular process;GO:0050794//regulation of cellular process
Unigene0001817	0.97	7.027	3.853	0.487	1.797	3.393	1.2	4.083	num-1	-	-	-	-	-	-	-	-
Unigene0001818	33.963	22.523	36.653	31.777	31.923	25.96	40.68	29.957	SEC10a	hepatoma-derived growth factor-related protein 2 [Sesamum indicum]	-	-	-	-	-	-	GO:0016192//vesicle-mediated transport;GO:0022406//membrane docking
Unigene0001819	0.677	10.78	5.767	0.333	2.01	4.437	1.94	4.137	--	-	-	-	-	-	-	-	-
Unigene0001820	0.267	4.81	1.277	0.083	1.223	2.79	0.43	2.163	--	-	-	-	-	-	-	-	-
Unigene0001821	4.163	0.183	2.933	6.157	6.18	0.087	2.22	3.81	--	zinc finger MYM-type protein 1-like [Dendrobium catenatum]	-	-	-	-	GO:0005911//cell-cell junction;GO:0043231//intracellular membrane-bounded organelle	-	-
Unigene0001822	1.34	11.103	6.807	0.63	3.227	4.93	1.94	6.2	spg-7	AFG3-like protein 2 [Rhodamnia argentea]	-	-	-	-	-	GO:0005488//binding;GO:0016787//hydrolase activity	-
Unigene0001823	7.73	4.96	5.48	6.037	7.403	4.257	7.1	6.093	HMA1	Cd2+/Zn2+-exporting ATPase [Salvia splendens]	-	-	-	-	GO:0009528//plastid inner membrane;GO:0031224//intrinsic component of membrane	GO:0005385//zinc ion transmembrane transporter activity;GO:0015086//cadmium ion transmembrane transporter activity;GO:0019829//cation-transporting ATPase activity;GO:0032550//purine ribonucleoside binding;GO:0043169//cation binding	GO:0006816//calcium ion transport;GO:0006829//zinc II ion transport;GO:0009416//response to light stimulus;GO:0015691//cadmium ion transport;GO:0042221//response to chemical;GO:0046916//cellular transition metal ion homeostasis;GO:0072507//divalent inorganic cation homeostasis
Unigene0001824	2.357	0	0.077	1.027	5.347	0	0.14	1.73	--	Os12g0614851 [Oryza sativa Japonica Group]	-	-	-	-	-	GO:0016740//transferase activity	-
Unigene0001825	0.477	0.77	0.81	0.467	0.313	1.143	0.107	0.153	--	-	-	-	-	-	-	-	-
Unigene0001826	0.04	0	2.603	0	0	0	5.013	0	--	-	-	-	-	-	-	-	-
Unigene0001827	2.767	8.953	6.327	15.013	3.13	8.483	4.99	13.027	--	-	-	-	-	-	-	-	-
Unigene0001828	1.777	0	2.777	2.71	3.07	0	6.25	2.527	--	-	-	-	-	-	-	-	-
Unigene0001829	29.523	22.693	23.897	45.393	21.603	24.987	23.94	33.39	FER	receptor-like protein kinase FERONIA [Sesamum indicum]	-	-	-	-	GO:0005911//cell-cell junction;GO:0016020//membrane;GO:0044426//cell wall part	GO:0004672//protein kinase activity;GO:0005488//binding	GO:0001558//regulation of cell growth;GO:0006468//protein phosphorylation;GO:0006970//response to osmotic stress;GO:0009620//response to fungus;GO:0009653//anatomical structure morphogenesis;GO:0009787//regulation of abscisic acid-activated signaling pathway;GO:0009856//pollination;GO:0010035//response to inorganic substance;GO:0044707//single-multicellular organism process;GO:0044723//single-org…
Unigene0001830	1.547	11.023	25.88	0.81	4.07	8.467	2.103	16.303	tyr-1	tyrosinase [Galdieria sulphuraria]	-	-	-	-	-	-	-
Unigene0001831	0.923	9.98	4.717	0.237	2.283	3.67	1.49	4.71	TRM61	PREDICTED: tRNA (adenine(58)-N(1))-methyltransferase catalytic subunit TRMT61A [Eucalyptus grandis]	-	-	-	-	-	-	-
Unigene0001832	5.4	3.29	6.56	5.887	3.617	1.897	4.947	3.097	--	Methyltransferase FkbM [Macleaya cordata]	-	-	-	-	-	-	-
Unigene0001833	0.37	7.46	2.703	0.273	1.217	2.433	1.213	2.39	--	-	-	-	-	-	-	-	-
Unigene0001834	1.033	9.923	4.857	0.427	2.03	4.187	1.647	3.76	--	-	-	-	-	-	-	-	-
Unigene0001835	0.603	7.257	5.167	0.383	1.753	3.783	1.47	4.31	SH3KBP1	SH3 domain-containing kinase-binding protein 1-like [Rhodamnia argentea]	-	-	-	-	-	-	-
Unigene0001836	1.24	0.053	0.35	0	0.267	0.383	0.477	0	--	PREDICTED: myosin-9 [Erythranthe guttata]	-	-	-	-	-	-	-
Unigene0001837	0.3	6.41	2.687	0.1	0.843	2.12	0.67	2	ssl-1	SNF2 domain-containing protein / helicase domain-containing protein [Arabidopsis thaliana]	-	-	-	-	-	GO:0003824//catalytic activity;GO:0097159//organic cyclic compound binding;GO:1901363//heterocyclic compound binding	GO:0006996//organelle organization;GO:0044763//single-organism cellular process;GO:0048449//floral organ formation;GO:0050789//regulation of biological process
Unigene0001838	1.253	13.657	7.25	0.473	3.13	5.02	1.507	6.147	Sars1	seryl-tRNA synthetase [Capsaspora owczarzaki ATCC 30864]	Genetic Information Processing	Translation	ko00970//Aminoacyl-tRNA biosynthesis	K01875	GO:0044444//cytoplasmic part	GO:0004812//aminoacyl-tRNA ligase activity	GO:0006006//glucose metabolic process;GO:0006090//pyruvate metabolic process;GO:0006418//tRNA aminoacylation for protein translation;GO:0006498//N-terminal protein lipidation;GO:0006970//response to osmotic stress;GO:0009117//nucleotide metabolic process;GO:0010038//response to metal ion
Unigene0001839	0.333	13.777	1.753	0.11	0.933	3.027	0.957	1.69	cpna-1	E3 ubiquitin-protein ligase RGLG3 isoform X2 [Cannabis sativa]	-	-	-	-	GO:0016020//membrane;GO:0043231//intracellular membrane-bounded organelle	GO:0019787//ubiquitin-like protein transferase activity	GO:0006725//cellular aromatic compound metabolic process;GO:0006950//response to stress;GO:0042445//hormone metabolic process;GO:0048585//negative regulation of response to stimulus
Unigene0001840	6.273	2.21	5.04	4.833	4.093	2.413	4.077	3.91	--	protein OBERON 2 isoform X2 [Sesamum indicum]	-	-	-	-	-	-	-
Unigene0001841	0.01	16.407	0.027	0	0	0.007	0.007	0	PMA1	PREDICTED: ATPase 8, plasma membrane-type-like [Ipomoea nil]	Metabolism;Metabolism	Global and overview maps;Energy metabolism	ko01100//Metabolic pathways;ko00190//Oxidative phosphorylation	K01535;K01535	GO:0016020//membrane;GO:0044424//intracellular part	GO:0015662//ATPase activity, coupled to transmembrane movement of ions, phosphorylative mechanism;GO:0036094//small molecule binding;GO:0043167//ion binding;GO:0097159//organic cyclic compound binding;GO:1901363//heterocyclic compound binding	GO:0015992//proton transport;GO:0018130//heterocycle biosynthetic process;GO:0019438//aromatic compound biosynthetic process;GO:0044711//single-organism biosynthetic process;GO:0044763//single-organism cellular process;GO:1901362//organic cyclic compound biosynthetic process
Unigene0001842	1.84	22.927	11.58	0.84	5.467	9.563	3.73	10.99	USP7	ubiquitin carboxyl-terminal hydrolase 7-like, partial [Rhodamnia argentea]	-	-	-	-	-	-	-
Unigene0001843	0.19	2.14	1.847	0.253	1.277	1.093	0.54	2.393	Gldc	Glycine dehydrogenase (decarboxylating) [Handroanthus impetiginosus]	Metabolism;Metabolism;Metabolism;Metabolism;Metabolism	Global and overview maps;Global and overview maps;Global and overview maps;Carbohydrate metabolism;Amino acid metabolism	ko01100//Metabolic pathways;ko01110//Biosynthesis of secondary metabolites;ko01200//Carbon metabolism;ko00630//Glyoxylate and dicarboxylate metabolism;ko00260//Glycine, serine and threonine metabolism	K00281;K00281;K00281;K00281;K00281	GO:0005576//extracellular region;GO:0009526//plastid envelope;GO:0009532//plastid stroma;GO:0031976//plastid thylakoid	GO:0016491//oxidoreductase activity;GO:0032550//purine ribonucleoside binding	GO:0000097//sulfur amino acid biosynthetic process;GO:0005982//starch metabolic process;GO:0005984//disaccharide metabolic process;GO:0006090//pyruvate metabolic process;GO:0006355//regulation of transcription, DNA-templated;GO:0006546//glycine catabolic process;GO:0006633//fatty acid biosynthetic process;GO:0006739//NADP metabolic process;GO:0006779//porphyrin-containing compound biosynthetic pr…
Unigene0001844	0.58	7.497	4.247	0.197	1.743	3.83	1.423	4.003	ATP2B4	plasma membrane calcium-transporting ATPase 2-like [Rhodamnia argentea]	-	-	-	-	GO:0005774//vacuolar membrane;GO:0044434//chloroplast part	GO:0003824//catalytic activity;GO:0005515//protein binding	GO:0006970//response to osmotic stress;GO:0009617//response to bacterium;GO:0043067//regulation of programmed cell death;GO:0050801//ion homeostasis;GO:0070838//divalent metal ion transport
Unigene0001845	0.26	4.08	2.16	0.11	0.953	1.877	0.58	1.977	TBC1D9	TBC1 domain family member 9-like [Rhodamnia argentea]	-	-	-	-	-	-	-
Unigene0001846	2.173	0.43	1.02	0.777	1.057	0.797	1.677	0.61	--	-	-	-	-	-	-	-	-
Unigene0001847	0.157	4.117	3.3	0.31	0.74	1.453	0.793	2.29	GCNT3	-	-	-	-	-	-	-	-
Unigene0001848	0.643	14.787	5.477	0.33	2.09	4.287	1.627	4.327	Smad4	mothers against decapentaplegic homolog 4-like [Rhodamnia argentea]	-	-	-	-	-	-	-
Unigene0001849	1.98	0.223	0.85	3.837	2.5	0.84	0.187	3.563	--	-	-	-	-	-	-	-	-
Unigene0001850	0.41	1.683	1.287	0.03	0.817	1.39	0.467	1.987	slc20a1	sodium/phosphate symporter [Blastocystis sp. ATCC 50177/Nand II]	-	-	-	-	GO:0009526//plastid envelope;GO:0016020//membrane	GO:0015114//phosphate ion transmembrane transporter activity	GO:0015698//inorganic anion transport;GO:0016043//cellular component organization;GO:0044763//single-organism cellular process
Unigene0001851	2.71	0.58	0.27	1.487	1.567	0.62	0.647	1.683	RPP8L2	probable disease resistance protein At1g58602 [Sesamum indicum]	-	-	-	-	GO:0005911//cell-cell junction	-	GO:0008152//metabolic process
Unigene0001852	0.437	4.993	3.803	0.203	1.277	2.81	1.177	2.867	ptc-3	Protein patched-like 1 [Porphyridium purpureum]	-	-	-	-	GO:0031090//organelle membrane;GO:0043231//intracellular membrane-bounded organelle	-	-
Unigene0001853	4.627	3.983	0.773	4.157	0.877	0.813	0	5.693	SAT	acyltransferase ACT5 [Plectranthus barbatus]	Metabolism;Metabolism;Metabolism;Metabolism;Metabolism	Global and overview maps;Global and overview maps;Biosynthesis of other secondary metabolites;Biosynthesis of other secondary metabolites;Biosynthesis of other secondary metabolites	ko01100//Metabolic pathways;ko01110//Biosynthesis of secondary metabolites;ko00940//Phenylpropanoid biosynthesis;ko00941//Flavonoid biosynthesis;ko00945//Stilbenoid, diarylheptanoid and gingerol biosynthesis	K13065;K13065;K13065;K13065;K13065	-	GO:0016740//transferase activity	-
Unigene0001854	11.817	1.337	7.227	11.06	9.387	1.853	2.9	9.887	PPE1	pentatricopeptide repeat protein [Salvia miltiorrhiza]	Metabolism;Metabolism	Global and overview maps;Carbohydrate metabolism	ko01100//Metabolic pathways;ko00040//Pentose and glucuronate interconversions	K01051;K01051	-	-	-
Unigene0001855	2.147	3.427	11.863	2.47	1.617	2.863	11.407	1.87	OFUT23	Peptide-O-fucosyltransferase [Handroanthus impetiginosus]	-	-	-	-	GO:0009536//plastid	GO:0016757//transferase activity, transferring glycosyl groups	GO:0019538//protein metabolic process
Unigene0001856	1.003	11.96	6.13	0.613	2.443	3.883	1.893	4.843	dut	dUTP pyrophosphatase [Monoraphidium neglectum]	Metabolism;Metabolism	Global and overview maps;Nucleotide metabolism	ko01100//Metabolic pathways;ko00240//Pyrimidine metabolism	K01520;K01520	-	-	-
Unigene0001857	7.41	1.343	2.22	2.413	3.657	1.353	2.05	1.9	SRR1	protein SENSITIVITY TO RED LIGHT REDUCED 1-like isoform X1 [Sesamum indicum]	-	-	-	-	GO:0043231//intracellular membrane-bounded organelle	-	GO:0007602//phototransduction;GO:0048511//rhythmic process
Unigene0001858	19.763	5.62	10.237	20.46	14.347	5.16	4.523	13.817	RPS3C	small subunit ribosomal protein S3e [Salvia splendens]	Genetic Information Processing	Translation	ko03010//Ribosome	K02985	-	-	-
Unigene0001859	1.51	1.993	2.37	1.12	1.223	0.45	1.127	0.83	--	splicing factor U2af large subunit A isoform X1 [Arabidopsis lyrata subsp. lyrata] [Arabidopsis lyrata]	-	-	-	-	-	-	-
Unigene0001860	0.247	10.503	5.717	0.12	0.32	3.23	0.917	0.043	EGC2	EG45-like domain containing protein [Sesamum indicum]	-	-	-	-	-	-	-
Unigene0001861	0.94	0.197	1.497	1.217	0.777	0.243	0.52	0.683	--	2-dehydro-3-deoxy-phosphogluconate aldolase [Handroanthus impetiginosus]	-	-	-	-	-	GO:0016832//aldehyde-lyase activity	-
Unigene0001862	0.757	9.113	6.573	0.327	1.617	3.703	1.26	3.913	GJ10962	polynucleotide 5'-hydroxyl-kinase NOL9-like isoform X2 [Helianthus annuus]	-	-	-	-	-	-	-
Unigene0001863	11.07	5.073	4.687	7.23	8.91	4.07	5.287	5.48	--	Rhodanese/cell cycle control phosphatase superfamily protein isoform 1 [Dorcoceras hygrometricum]	-	-	-	-	GO:0009536//plastid	-	GO:0006725//cellular aromatic compound metabolic process;GO:0008610//lipid biosynthetic process;GO:0009416//response to light stimulus;GO:0015979//photosynthesis;GO:0019752//carboxylic acid metabolic process;GO:0044249//cellular biosynthetic process;GO:0044255//cellular lipid metabolic process;GO:0044283//small molecule biosynthetic process;GO:0046483//heterocycle metabolic process;GO:0071840//ce…
Unigene0001864	2.817	0.35	2.14	1.74	4.57	0.487	3.547	1.477	rnhA	protein ALP1-like [Sesamum indicum]	-	-	-	-	-	-	-
Unigene0001865	34.827	16.38	20.507	25.437	26.073	11.53	19.373	20.607	UBP6	ubiquitin carboxyl-terminal hydrolase 14 [Salvia splendens]	-	-	-	-	-	-	-
Unigene0001866	4.23	0.697	2.203	2.963	4.337	2.06	3.19	3.957	R1A-10	Apoptotic ATPase [Handroanthus impetiginosus]	-	-	-	-	-	-	-
Unigene0001867	0.663	8.127	4.6	0.247	1.84	3.827	1.107	3.48	gon-2	-	-	-	-	-	-	-	-
Unigene0001868	0.32	0.057	0.447	0.583	0.173	0.47	0.097	0.407	--	-	-	-	-	-	-	-	-
Unigene0001869	6.773	3.747	5.89	6.45	6.05	4.173	6.637	5.667	VAR3	PREDICTED: zinc finger protein VAR3, chloroplastic isoform X3 [Nicotiana tabacum]	-	-	-	-	-	GO:0003824//catalytic activity	-
Unigene0001870	15.073	13.01	15.287	16.207	17.357	5.743	2.613	9.497	At5g49770	probable leucine-rich repeat receptor-like protein kinase At5g49770 isoform X2 [Sesamum indicum]	-	-	-	-	GO:0016020//membrane	GO:0004674//protein serine/threonine kinase activity;GO:0016491//oxidoreductase activity;GO:0036094//small molecule binding;GO:0097159//organic cyclic compound binding;GO:1901363//heterocyclic compound binding	GO:0006468//protein phosphorylation;GO:0044036//cell wall macromolecule metabolic process;GO:0044710//single-organism metabolic process
Unigene0001871	0.543	16.623	3.297	0.29	1.47	3.673	0.91	2.157	F55G1.9	pyrroline-5-carboxylate reductase [Raphidocelis subcapitata]	Metabolism;Metabolism;Metabolism;Metabolism	Global and overview maps;Global and overview maps;Global and overview maps;Amino acid metabolism	ko01100//Metabolic pathways;ko01110//Biosynthesis of secondary metabolites;ko01230//Biosynthesis of amino acids;ko00330//Arginine and proline metabolism	K00286;K00286;K00286;K00286	GO:0044464//cell part	GO:0016491//oxidoreductase activity	GO:0006560//proline metabolic process;GO:0006950//response to stress;GO:0009628//response to abiotic stimulus
Unigene0001872	3.843	0.81	1.767	2.573	1.807	0.947	2.173	1.547	--	-	-	-	-	-	-	-	-
Unigene0001873	0.537	5.13	3.69	0.403	2.057	3.457	1.02	4.397	--	PREDICTED: cytochrome b561 and DOMON domain-containing protein At5g47530-like [Populus euphratica]	-	-	-	-	-	-	-
Unigene0001874	0.857	0.55	3.903	0.633	0.667	0.273	6.923	0.78	--	-	-	-	-	-	-	-	-
Unigene0001875	2.533	1.34	1.527	2.583	1.96	1.067	1.84	2.223	MED22B	mediator of RNA polymerase II transcription subunit 22-like protein, partial [Rehmannia glutinosa]	-	-	-	-	GO:0043231//intracellular membrane-bounded organelle;GO:0043234//protein complex	-	GO:0006355//regulation of transcription, DNA-templated
Unigene0001876	0.12	6.767	2.38	0.12	0.723	2.433	2.363	3.677	Ugt2b	UDP-Glycosyltransferase/glycogen phosphorylase [Coccomyxa subellipsoidea C-169]	Metabolism;Metabolism;Metabolism;Metabolism;Metabolism	Global and overview maps;Global and overview maps;Carbohydrate metabolism;Carbohydrate metabolism;Metabolism of cofactors and vitamins	ko01100//Metabolic pathways;ko01110//Biosynthesis of secondary metabolites;ko00040//Pentose and glucuronate interconversions;ko00053//Ascorbate and aldarate metabolism;ko00860//Porphyrin and chlorophyll metabolism	K00699;K00699;K00699;K00699;K00699	-	GO:0016740//transferase activity	-
Unigene0001878	0.203	3.54	1.517	0.083	0.557	1.073	0.29	1.293	--	-	-	-	-	-	-	-	-
Unigene0001879	0	6.88	0	0	0	0	0	0	--	-	-	-	-	-	-	-	-
Unigene0001880	6.187	2.11	4.2	2.46	3.617	2.063	2.243	1.99	At3g63340	protein phosphatase 1K [Salvia splendens]	-	-	-	-	-	GO:0016787//hydrolase activity	-
Unigene0001881	0	3.873	0	0	0	2.827	0	0	4CLL9	4-coumarate--CoA ligase-like 9 isoform X1 [Olea europaea var. sylvestris] [Olea europaea]	Metabolism;Metabolism;Metabolism;Metabolism	Global and overview maps;Global and overview maps;Biosynthesis of other secondary metabolites;Metabolism of cofactors and vitamins	ko01100//Metabolic pathways;ko01110//Biosynthesis of secondary metabolites;ko00940//Phenylpropanoid biosynthesis;ko00130//Ubiquinone and other terpenoid-quinone biosynthesis	K01904;K01904;K01904;K01904	GO:0042579//microbody	GO:0016405//CoA-ligase activity;GO:0016408//C-acyltransferase activity	GO:0006631//fatty acid metabolic process;GO:0009694//jasmonic acid metabolic process;GO:0009850//auxin metabolic process;GO:0072330//monocarboxylic acid biosynthetic process
Unigene0001882	24.31	7.687	20.747	13.59	31.737	5.63	20.803	15.347	XXT5	xyloglucan 6-xylosyltransferase [Salvia splendens]	-	-	-	-	GO:0031090//organelle membrane;GO:0031224//intrinsic component of membrane;GO:0031984//organelle subcompartment;GO:0043231//intracellular membrane-bounded organelle	GO:0005488//binding;GO:0042285//xylosyltransferase activity	GO:0006006//glucose metabolic process;GO:0006073//cellular glucan metabolic process;GO:0048588//developmental cell growth
Unigene0001883	74.163	263.797	124.09	70.89	26.16	150.37	73.82	35.63	GOLS1	galactinol synthase [Salvia miltiorrhiza]	Metabolism;Metabolism	Global and overview maps;Carbohydrate metabolism	ko01100//Metabolic pathways;ko00052//Galactose metabolism	K18819;K18819	GO:0044424//intracellular part	GO:0035250//UDP-galactosyltransferase activity;GO:0043169//cation binding	GO:0000302//response to reactive oxygen species;GO:0001101//response to acid chemical;GO:0006970//response to osmotic stress;GO:0009312//oligosaccharide biosynthetic process;GO:0009409//response to cold;GO:0009642//response to light intensity;GO:0019318//hexose metabolic process;GO:0052575//carbohydrate localization
Unigene0001884	0.187	3.82	1.693	0.043	1.073	1.693	0.613	1.653	DDX58	endoribonuclease Dicer homolog 3a-like [Papaver somniferum]	-	-	-	-	-	-	-
Unigene0001885	8.617	0.307	12.857	12.827	4.887	0.613	16.54	11.757	--	-	-	-	-	-	-	-	-
Unigene0001886	4.867	1.64	4.05	2.963	3.753	1.27	2.243	2.093	At5g48970	Mitochondrial thiamine pyrophosphate carrier 1 [Triticum urartu]	-	-	-	-	GO:0019866//organelle inner membrane;GO:0031224//intrinsic component of membrane;GO:0043231//intracellular membrane-bounded organelle	GO:0016741//transferase activity, transferring one-carbon groups;GO:0051183//vitamin transporter activity	GO:0008152//metabolic process;GO:0015695//organic cation transport;GO:0044763//single-organism cellular process;GO:1902582//single-organism intracellular transport
Unigene0001887	0	0	0.167	0	0	0	0.567	0	--	-	-	-	-	-	-	-	-
Unigene0001888	43.067	16.01	30.893	32.497	29.257	17.52	27.317	20.907	HST	hydroxycinnamoyl-CoA shikimate/quinate hydroxycinnamoyltransferase [Salvia miltiorrhiza]	Metabolism;Metabolism;Metabolism;Metabolism;Metabolism	Global and overview maps;Global and overview maps;Biosynthesis of other secondary metabolites;Biosynthesis of other secondary metabolites;Biosynthesis of other secondary metabolites	ko01100//Metabolic pathways;ko01110//Biosynthesis of secondary metabolites;ko00940//Phenylpropanoid biosynthesis;ko00941//Flavonoid biosynthesis;ko00945//Stilbenoid, diarylheptanoid and gingerol biosynthesis	K13065;K13065;K13065;K13065;K13065	GO:0044444//cytoplasmic part	GO:0005488//binding;GO:0050737//O-hydroxycinnamoyltransferase activity	GO:0006605//protein targeting;GO:0006950//response to stress;GO:0009699//phenylpropanoid biosynthetic process;GO:0009891//positive regulation of biosynthetic process;GO:0043067//regulation of programmed cell death;GO:0048878//chemical homeostasis
Unigene0001889	83.07	1.077	100.383	47.94	5.813	7.247	39.78	21.157	GASA11	gibberellin-regulated protein 14-like [Olea europaea var. sylvestris] [Olea europaea]	-	-	-	-	-	-	-
Unigene0001890	5.793	0.04	0.1	4.443	10.403	0.07	0.21	6.523	At1g28590	GDSL esterase/lipase At1g28570-like isoform X2 [Olea europaea var. sylvestris] [Olea europaea]	-	-	-	-	GO:0030312//external encapsulating structure;GO:0043231//intracellular membrane-bounded organelle	GO:0016788//hydrolase activity, acting on ester bonds	-
Unigene0001891	11.967	7.137	11.923	10.633	10.293	6.41	13.587	9.047	--	coiled-coil domain-containing protein 55 [Salvia splendens]	-	-	-	-	GO:0043231//intracellular membrane-bounded organelle	GO:0016787//hydrolase activity	GO:0042127//regulation of cell proliferation
Unigene0001892	0.727	0.617	1.95	0.663	1.443	1.027	3.363	0.893	--	-	-	-	-	-	-	-	-
Unigene0001893	19.833	19.14	21.487	16.553	12.523	17.223	24.103	15.553	--	D-aminoacid aminotransferase-like PLP-dependentenzymes superfamily protein [Striga asiatica]	-	-	-	-	-	-	-
Unigene0001894	0.36	6.227	1.87	0.157	1.23	1.997	0.323	1.663	Suco	SUN domain-containing ossification factor-like [Spinacia oleracea]	-	-	-	-	-	-	-
Unigene0001895	0.227	0	1.31	0.087	0.86	0.03	2.307	0.113	--	-	-	-	-	-	-	-	-
Unigene0001896	12.063	1.32	0.927	2.603	5.36	1.603	2.697	3.323	KN	PREDICTED: syntaxin-related protein KNOLLE [Erythranthe guttata]	Genetic Information Processing	Folding, sorting and degradation	ko04130//SNARE interactions in vesicular transport	K08486	-	-	-
Unigene0001897	1.53	1.803	5.98	1.193	0.613	1.557	12.5	0.973	SCPL24	Serine carboxypeptidases (lysosomal cathepsin A) [Handroanthus impetiginosus]	-	-	-	-	GO:0044421//extracellular region part	GO:0004180//carboxypeptidase activity	GO:0019538//protein metabolic process;GO:0043401//steroid hormone mediated signaling pathway
Unigene0001898	0.887	11.277	7.95	0.52	2.61	4.963	2.01	6.667	DNM1L	dynamin central region family protein [Capsaspora owczarzaki ATCC 30864]	-	-	-	-	GO:0009526//plastid envelope;GO:0016020//membrane;GO:0042579//microbody	GO:0005515//protein binding;GO:0005543//phospholipid binding;GO:0017111//nucleoside-triphosphatase activity	GO:0003006//developmental process involved in reproduction;GO:0007005//mitochondrion organization;GO:0007031//peroxisome organization;GO:0009628//response to abiotic stimulus;GO:0009791//post-embryonic development;GO:0032535//regulation of cellular component size;GO:0033036//macromolecule localization;GO:0044238//primary metabolic process;GO:0044260//cellular macromolecule metabolic process;GO:00…
Unigene0001899	0.573	0	0.93	0.717	0.457	0.027	0	1.037	--	-	-	-	-	-	-	-	-
Unigene0001900	0.89	13.183	5.743	0.523	2.493	5.74	1.88	5.347	mig-22	-	-	-	-	-	-	-	-
Unigene0001901	16.337	9.757	11.917	11.383	10.263	4.32	9.743	8.59	YIPF1	folylpolyglutamate synthase [Salvia splendens]	-	-	-	-	GO:0031224//intrinsic component of membrane	-	-
Unigene0001902	0.807	13.62	4.71	0.373	3	5.627	1.47	5.743	atg-2	autophagy-related protein 2 isoform X1 [Cucurbita pepo subsp. pepo] [Cucurbita pepo]	-	-	-	-	-	-	-
[truncated: 50,398 more rows]
