# Supplementary material for: Comparative transcriptome analyses of different Salvia miltiorrhiza varieties during the accumulation of tanshinones
Source: PeerJ. 2021 Oct 20;9:e12300. doi: 10.7717/peerj.12300 (PMC8541307; doi:10.7717/peerj.12300)
Supplement: Supplemental Information 11 [file peerj-09-12300-s011.xlsx]

## Sheet: Sheet1
Table S6. Tanshinone biosynthesis-related genes identified by KEGG
ID	SC2	YN2	SX2	HN2	SC1	YN1	SX1	HN1	SC2_count	YN2_count	SX2_count	HN2_count	SC1_count	YN1_count	SX1_count	HN1_count	Symbol	Description	KEGG_A_class	KEGG_B_class	Pathway	K_ID	GO.Component	GO.Function	GO.Process
Unigene0051470	0	0	0.517	0	0	0	1.23	0	0	0	4	0	0	0	10.667	0	--	ditrans,polycis-polyprenyl diphosphate synthase [Salvia splendens]	Metabolism;Metabolism	Global and overview maps;Metabolism of terpenoids and polyketides	ko01110//Biosynthesis of secondary metabolites;ko00900//Terpenoid backbone biosynthesis	K11778;K11778	-	-	-
Unigene0050470	9.773	1.69	0.057	2.673	9.393	0.84	0.05	2.617	66.667	10.667	0.333	20	71.333	7	0.333	18.333	--	ditrans,polycis-polyprenyl diphosphate synthase [Salvia splendens]	Metabolism;Metabolism	Global and overview maps;Metabolism of terpenoids and polyketides	ko01110//Biosynthesis of secondary metabolites;ko00900//Terpenoid backbone biosynthesis	K11778;K11778	-	-	-
Unigene0005300	18.907	18.49	35.177	23.96	9.503	17.103	23.663	17.033	443.667	402	753	598	254.667	482.667	574.667	405.667	--	dihydroflavonol-4-reductase [Salvia officinalis]	Metabolism;Metabolism;Metabolism	Global and overview maps;Metabolism of terpenoids and polyketides;Metabolism of terpenoids and polyketides	ko01110//Biosynthesis of secondary metabolites;ko00900//Terpenoid backbone biosynthesis;ko00909//Sesquiterpenoid and triterpenoid biosynthesis	K15891;K15891;K15891	GO:0031090//organelle membrane;GO:0043231//intracellular membrane-bounded organelle;GO:0044444//cytoplasmic part	GO:0016616//oxidoreductase activity, acting on the CH-OH group of donors, NAD or NADP as acceptor;GO:0048037//cofactor binding	GO:0006714//sesquiterpenoid metabolic process;GO:0009746//response to hexose;GO:0009787//regulation of abscisic acid-activated signaling pathway;GO:0009814//defense response, incompatible interaction;GO:0033554//cellular response to stress;GO:0034285//response to disaccharide;GO:0043094//cellular metabolic compound salvage
Unigene0001750	13.78	5.36	14.147	8.833	13.927	6.867	12.883	7.37	376.667	139	351	249.667	426	229.667	367	207.667	--	ditrans,polycis-polyprenyl diphosphate synthase [Salvia splendens]	Metabolism;Metabolism	Global and overview maps;Metabolism of terpenoids and polyketides	ko01110//Biosynthesis of secondary metabolites;ko00900//Terpenoid backbone biosynthesis	K11778;K11778	-	GO:0016765//transferase activity, transferring alkyl or aryl (other than methyl) groups	GO:0006950//response to stress;GO:0008152//metabolic process;GO:0009628//response to abiotic stimulus;GO:0044763//single-organism cellular process
Unigene0044935	0.14	0	0	0.663	0.153	0	0	0.427	1	0	0	5	1.333	0	0	3	AACT	Acetyl-CoA acetyltransferase [Ectocarpus siliculosus]	Metabolism;Metabolism;Metabolism;Metabolism;Metabolism;Metabolism;Metabolism;Metabolism;Metabolism;Metabolism;Metabolism;Metabolism;Metabolism;Metabolism	Global and overview maps;Global and overview maps;Global and overview maps;Carbohydrate metabolism;Carbohydrate metabolism;Global and overview maps;Amino acid metabolism;Lipid metabolism;Amino acid metabolism;Carbohydrate metabolism;Metabolism of terpenoids and polyketides;Amino acid metabolism;Carbohydrate metabolism;Lipid metabolism	ko01100//Metabolic pathways;ko01110//Biosynthesis of secondary metabolites;ko01200//Carbon metabolism;ko00620//Pyruvate metabolism;ko00630//Glyoxylate and dicarboxylate metabolism;ko01212//Fatty acid metabolism;ko00280//Valine, leucine and isoleucine degradation;ko00071//Fatty acid degradation;ko00380//Tryptophan metabolism;ko00640//Propanoate metabolism;ko00900//Terpenoid backbone biosynthesis;k…	K00626;K00626;K00626;K00626;K00626;K00626;K00626;K00626;K00626;K00626;K00626;K00626;K00626;K00626	GO:0016020//membrane;GO:0042579//microbody	GO:0003988//acetyl-CoA C-acyltransferase activity	GO:0000904//cell morphogenesis involved in differentiation;GO:0003006//developmental process involved in reproduction;GO:0006084//acetyl-CoA metabolic process;GO:0016104//triterpenoid biosynthetic process;GO:0016129//phytosteroid biosynthetic process;GO:0044707//single-multicellular organism process
Unigene0047347	0.697	0	0	2.12	0.14	0	0	0.553	11	0	0	35.333	2.667	0	0	8.667	AACT1	acetyl-CoA acetyltransferase [Capsaspora owczarzaki ATCC 30864]	Metabolism;Metabolism;Metabolism;Metabolism;Metabolism;Metabolism;Metabolism;Metabolism;Metabolism;Metabolism;Metabolism;Metabolism;Metabolism;Metabolism	Global and overview maps;Global and overview maps;Global and overview maps;Carbohydrate metabolism;Carbohydrate metabolism;Global and overview maps;Amino acid metabolism;Lipid metabolism;Amino acid metabolism;Carbohydrate metabolism;Metabolism of terpenoids and polyketides;Amino acid metabolism;Carbohydrate metabolism;Lipid metabolism	ko01100//Metabolic pathways;ko01110//Biosynthesis of secondary metabolites;ko01200//Carbon metabolism;ko00620//Pyruvate metabolism;ko00630//Glyoxylate and dicarboxylate metabolism;ko01212//Fatty acid metabolism;ko00280//Valine, leucine and isoleucine degradation;ko00071//Fatty acid degradation;ko00380//Tryptophan metabolism;ko00640//Propanoate metabolism;ko00900//Terpenoid backbone biosynthesis;k…	K00626;K00626;K00626;K00626;K00626;K00626;K00626;K00626;K00626;K00626;K00626;K00626;K00626;K00626	GO:0016020//membrane;GO:0042579//microbody	GO:0003988//acetyl-CoA C-acyltransferase activity	GO:0000904//cell morphogenesis involved in differentiation;GO:0006084//acetyl-CoA metabolic process;GO:0016104//triterpenoid biosynthetic process;GO:0016129//phytosteroid biosynthetic process;GO:0022414//reproductive process;GO:0044707//single-multicellular organism process
Unigene0036374	12.393	12.44	11.79	8.07	7.6	7.8	10.67	6.363	445.333	418.667	386	308.667	312	342.333	406	235.667	AACT1	acetyl- CoA C- acetyl transferase [Isodon rubescens]	Metabolism;Metabolism;Metabolism;Metabolism;Metabolism;Metabolism;Metabolism;Metabolism;Metabolism;Metabolism;Metabolism;Metabolism;Metabolism;Metabolism	Global and overview maps;Global and overview maps;Global and overview maps;Carbohydrate metabolism;Carbohydrate metabolism;Global and overview maps;Amino acid metabolism;Lipid metabolism;Amino acid metabolism;Carbohydrate metabolism;Metabolism of terpenoids and polyketides;Amino acid metabolism;Carbohydrate metabolism;Lipid metabolism	ko01100//Metabolic pathways;ko01110//Biosynthesis of secondary metabolites;ko01200//Carbon metabolism;ko00620//Pyruvate metabolism;ko00630//Glyoxylate and dicarboxylate metabolism;ko01212//Fatty acid metabolism;ko00280//Valine, leucine and isoleucine degradation;ko00071//Fatty acid degradation;ko00380//Tryptophan metabolism;ko00640//Propanoate metabolism;ko00900//Terpenoid backbone biosynthesis;k…	K00626;K00626;K00626;K00626;K00626;K00626;K00626;K00626;K00626;K00626;K00626;K00626;K00626;K00626	GO:0016020//membrane;GO:0042579//microbody	GO:0003988//acetyl-CoA C-acyltransferase activity;GO:0043169//cation binding	GO:0000904//cell morphogenesis involved in differentiation;GO:0006084//acetyl-CoA metabolic process;GO:0016104//triterpenoid biosynthetic process;GO:0016129//phytosteroid biosynthetic process;GO:0044707//single-multicellular organism process
Unigene0024856	2.033	14.37	9.973	0.757	5.763	7.463	3.42	10.787	37	230.333	150	11.333	107.333	156.667	62.333	190	AACT1	LOW QUALITY PROTEIN: acetyl-CoA acetyltransferase A, mitochondrial-like, partial [Rhodamnia argentea]	Metabolism;Metabolism;Metabolism;Metabolism;Metabolism;Metabolism;Metabolism;Metabolism;Metabolism;Metabolism;Metabolism;Metabolism;Metabolism;Metabolism	Global and overview maps;Global and overview maps;Global and overview maps;Carbohydrate metabolism;Carbohydrate metabolism;Global and overview maps;Amino acid metabolism;Lipid metabolism;Amino acid metabolism;Carbohydrate metabolism;Metabolism of terpenoids and polyketides;Amino acid metabolism;Carbohydrate metabolism;Lipid metabolism	ko01100//Metabolic pathways;ko01110//Biosynthesis of secondary metabolites;ko01200//Carbon metabolism;ko00620//Pyruvate metabolism;ko00630//Glyoxylate and dicarboxylate metabolism;ko01212//Fatty acid metabolism;ko00280//Valine, leucine and isoleucine degradation;ko00071//Fatty acid degradation;ko00380//Tryptophan metabolism;ko00640//Propanoate metabolism;ko00900//Terpenoid backbone biosynthesis;k…	K00626;K00626;K00626;K00626;K00626;K00626;K00626;K00626;K00626;K00626;K00626;K00626;K00626;K00626	GO:0005737//cytoplasm	GO:0016746//transferase activity, transferring acyl groups	GO:0006066//alcohol metabolic process;GO:0008202//steroid metabolic process;GO:0008610//lipid biosynthetic process;GO:0044249//cellular biosynthetic process;GO:0044763//single-organism cellular process;GO:1901362//organic cyclic compound biosynthetic process
Unigene0002621	6.42	33.053	28.963	4.94	26.897	21.697	11.153	44.36	124.333	564	461	78.667	531.333	482	211.667	826.667	AACT1	PREDICTED: acetyl-CoA acetyltransferase, mitochondrial-like [Pyrus x bretschneideri]	Metabolism;Metabolism;Metabolism;Metabolism;Metabolism;Metabolism;Metabolism;Metabolism;Metabolism;Metabolism;Metabolism;Metabolism;Metabolism;Metabolism	Global and overview maps;Global and overview maps;Global and overview maps;Carbohydrate metabolism;Carbohydrate metabolism;Global and overview maps;Amino acid metabolism;Lipid metabolism;Amino acid metabolism;Carbohydrate metabolism;Metabolism of terpenoids and polyketides;Amino acid metabolism;Carbohydrate metabolism;Lipid metabolism	ko01100//Metabolic pathways;ko01110//Biosynthesis of secondary metabolites;ko01200//Carbon metabolism;ko00620//Pyruvate metabolism;ko00630//Glyoxylate and dicarboxylate metabolism;ko01212//Fatty acid metabolism;ko00280//Valine, leucine and isoleucine degradation;ko00071//Fatty acid degradation;ko00380//Tryptophan metabolism;ko00640//Propanoate metabolism;ko00900//Terpenoid backbone biosynthesis;k…	K00626;K00626;K00626;K00626;K00626;K00626;K00626;K00626;K00626;K00626;K00626;K00626;K00626;K00626	GO:0044464//cell part	GO:0016746//transferase activity, transferring acyl groups	GO:0008610//lipid biosynthetic process;GO:0044237//cellular metabolic process;GO:1901360//organic cyclic compound metabolic process
Unigene0000768	61.767	54.137	70.063	60.527	59.037	53.207	84.537	52.097	1963.33	1610	1998.67	2017.67	2109.67	2057.33	2779.67	1700	AACT1	acetoacetyl-coenzyme A thiolase [Salvia miltiorrhiza]	Metabolism;Metabolism;Metabolism;Metabolism;Metabolism;Metabolism;Metabolism;Metabolism;Metabolism;Metabolism;Metabolism;Metabolism;Metabolism;Metabolism	Global and overview maps;Global and overview maps;Global and overview maps;Carbohydrate metabolism;Carbohydrate metabolism;Global and overview maps;Amino acid metabolism;Lipid metabolism;Amino acid metabolism;Carbohydrate metabolism;Metabolism of terpenoids and polyketides;Amino acid metabolism;Carbohydrate metabolism;Lipid metabolism	ko01100//Metabolic pathways;ko01110//Biosynthesis of secondary metabolites;ko01200//Carbon metabolism;ko00620//Pyruvate metabolism;ko00630//Glyoxylate and dicarboxylate metabolism;ko01212//Fatty acid metabolism;ko00280//Valine, leucine and isoleucine degradation;ko00071//Fatty acid degradation;ko00380//Tryptophan metabolism;ko00640//Propanoate metabolism;ko00900//Terpenoid backbone biosynthesis;k…	K00626;K00626;K00626;K00626;K00626;K00626;K00626;K00626;K00626;K00626;K00626;K00626;K00626;K00626	GO:0016020//membrane;GO:0042579//microbody	GO:0003988//acetyl-CoA C-acyltransferase activity;GO:0043169//cation binding	GO:0000904//cell morphogenesis involved in differentiation;GO:0003006//developmental process involved in reproduction;GO:0006084//acetyl-CoA metabolic process;GO:0016104//triterpenoid biosynthetic process;GO:0016129//phytosteroid biosynthetic process;GO:0044707//single-multicellular organism process
Unigene0069297	3.107	37.427	18.683	2.033	9.513	15.787	6.347	18.697	52	560.333	263.333	28.667	166.333	310.667	107.667	308.667	AACT2	acetyl-CoA C-acetyltransferase [Capsaspora owczarzaki ATCC 30864]	Metabolism;Metabolism;Metabolism;Metabolism;Metabolism;Metabolism;Metabolism;Metabolism;Metabolism;Metabolism;Metabolism;Metabolism;Metabolism;Metabolism	Global and overview maps;Global and overview maps;Global and overview maps;Carbohydrate metabolism;Carbohydrate metabolism;Global and overview maps;Amino acid metabolism;Lipid metabolism;Amino acid metabolism;Carbohydrate metabolism;Metabolism of terpenoids and polyketides;Amino acid metabolism;Carbohydrate metabolism;Lipid metabolism	ko01100//Metabolic pathways;ko01110//Biosynthesis of secondary metabolites;ko01200//Carbon metabolism;ko00620//Pyruvate metabolism;ko00630//Glyoxylate and dicarboxylate metabolism;ko01212//Fatty acid metabolism;ko00280//Valine, leucine and isoleucine degradation;ko00071//Fatty acid degradation;ko00380//Tryptophan metabolism;ko00640//Propanoate metabolism;ko00900//Terpenoid backbone biosynthesis;k…	K00626;K00626;K00626;K00626;K00626;K00626;K00626;K00626;K00626;K00626;K00626;K00626;K00626;K00626	GO:0016020//membrane;GO:0042579//microbody	GO:0003988//acetyl-CoA C-acyltransferase activity	GO:0000904//cell morphogenesis involved in differentiation;GO:0006084//acetyl-CoA metabolic process;GO:0006694//steroid biosynthetic process;GO:0008299//isoprenoid biosynthetic process;GO:0044707//single-multicellular organism process;GO:0046165//alcohol biosynthetic process
Unigene0036782	0.443	0	0	1.62	0.167	0	0	0.343	4.333	0	0	17	2	0	0	3.333	AACT2	acetyl-CoA C-acetyltransferase [Capsaspora owczarzaki ATCC 30864]	Metabolism;Metabolism;Metabolism;Metabolism;Metabolism;Metabolism;Metabolism;Metabolism;Metabolism;Metabolism;Metabolism;Metabolism;Metabolism;Metabolism	Global and overview maps;Global and overview maps;Global and overview maps;Carbohydrate metabolism;Carbohydrate metabolism;Global and overview maps;Amino acid metabolism;Lipid metabolism;Amino acid metabolism;Carbohydrate metabolism;Metabolism of terpenoids and polyketides;Amino acid metabolism;Carbohydrate metabolism;Lipid metabolism	ko01100//Metabolic pathways;ko01110//Biosynthesis of secondary metabolites;ko01200//Carbon metabolism;ko00620//Pyruvate metabolism;ko00630//Glyoxylate and dicarboxylate metabolism;ko01212//Fatty acid metabolism;ko00280//Valine, leucine and isoleucine degradation;ko00071//Fatty acid degradation;ko00380//Tryptophan metabolism;ko00640//Propanoate metabolism;ko00900//Terpenoid backbone biosynthesis;k…	K00626;K00626;K00626;K00626;K00626;K00626;K00626;K00626;K00626;K00626;K00626;K00626;K00626;K00626	GO:0044444//cytoplasmic part	GO:0003988//acetyl-CoA C-acyltransferase activity	GO:0006066//alcohol metabolic process;GO:0008202//steroid metabolic process;GO:0008610//lipid biosynthetic process;GO:0044249//cellular biosynthetic process;GO:0044707//single-multicellular organism process;GO:0044763//single-organism cellular process;GO:0044767//single-organism developmental process;GO:0048856//anatomical structure development;GO:1901362//organic cyclic compound biosynthetic pro…
Unigene0036781	0.217	0	0	0.603	0.043	0	0	0.11	1.333	0	0	4	0.333	0	0	0.667	AACT2	acetyl-CoA C-acetyltransferase [Capsaspora owczarzaki ATCC 30864]	Metabolism;Metabolism;Metabolism;Metabolism;Metabolism;Metabolism;Metabolism;Metabolism;Metabolism;Metabolism;Metabolism;Metabolism;Metabolism;Metabolism	Global and overview maps;Global and overview maps;Global and overview maps;Carbohydrate metabolism;Carbohydrate metabolism;Global and overview maps;Amino acid metabolism;Lipid metabolism;Amino acid metabolism;Carbohydrate metabolism;Metabolism of terpenoids and polyketides;Amino acid metabolism;Carbohydrate metabolism;Lipid metabolism	ko01100//Metabolic pathways;ko01110//Biosynthesis of secondary metabolites;ko01200//Carbon metabolism;ko00620//Pyruvate metabolism;ko00630//Glyoxylate and dicarboxylate metabolism;ko01212//Fatty acid metabolism;ko00280//Valine, leucine and isoleucine degradation;ko00071//Fatty acid degradation;ko00380//Tryptophan metabolism;ko00640//Propanoate metabolism;ko00900//Terpenoid backbone biosynthesis;k…	K00626;K00626;K00626;K00626;K00626;K00626;K00626;K00626;K00626;K00626;K00626;K00626;K00626;K00626	GO:0009536//plastid;GO:0031090//organelle membrane;GO:0042579//microbody;GO:0043232//intracellular non-membrane-bounded organelle	GO:0016408//C-acyltransferase activity	GO:0006511//ubiquitin-dependent protein catabolic process;GO:0007031//peroxisome organization;GO:0009062//fatty acid catabolic process;GO:0009404//toxin metabolic process;GO:0009787//regulation of abscisic acid-activated signaling pathway;GO:0035966//response to topologically incorrect protein;GO:0043248//proteasome assembly;GO:0044711//single-organism biosynthetic process;GO:1901576//organic sub…
Unigene0024410	6.98	3.153	9.193	5.303	4.717	4.153	7.637	4.19	259.333	109	310.333	205.667	196.333	186.667	292	159	At2g17570	undecaprenyl diphosphate synthase [Salvia splendens]	Metabolism;Metabolism	Global and overview maps;Metabolism of terpenoids and polyketides	ko01110//Biosynthesis of secondary metabolites;ko00900//Terpenoid backbone biosynthesis	K11778;K11778	-	GO:0016765//transferase activity, transferring alkyl or aryl (other than methyl) groups	-
Unigene0032814	1.857	1.267	2.847	2.65	0.887	1.477	2.49	1.633	45	28.333	62.667	68.667	24.333	43.333	62	40.333	At5g58770	undecaprenyl diphosphate synthase [Salvia splendens]	Metabolism;Metabolism	Global and overview maps;Metabolism of terpenoids and polyketides	ko01110//Biosynthesis of secondary metabolites;ko00900//Terpenoid backbone biosynthesis	K11778;K11778	GO:0044425//membrane part	GO:0016765//transferase activity, transferring alkyl or aryl (other than methyl) groups	GO:0016094//polyprenol biosynthetic process
Unigene0006197	3.323	0	1.667	2.533	3.037	0.333	0.787	3.753	60.667	0	26.667	46.667	64.667	7.333	14.333	70.333	At5g58770	ditrans,polycis-polyprenyl diphosphate synthase [Salvia splendens]	Metabolism;Metabolism	Global and overview maps;Metabolism of terpenoids and polyketides	ko01110//Biosynthesis of secondary metabolites;ko00900//Terpenoid backbone biosynthesis	K11778;K11778	GO:0016020//membrane;GO:0043227//membrane-bounded organelle	GO:0016740//transferase activity	GO:0016094//polyprenol biosynthetic process
Unigene0007189	339.697	50.317	168.643	116.573	317.253	125.833	371.423	369.437	11759	1695	5341	4262	12890.7	5481	13582.7	13571.7	CPS3	copalyl diphosphate synthase [Salvia miltiorrhiza]	-	-	-	-	GO:0009536//plastid	GO:0016838//carbon-oxygen lyase activity, acting on phosphates;GO:0016872//intramolecular lyase activity;GO:0046872//metal ion binding	GO:0006950//response to stress;GO:0008654//phospholipid biosynthetic process;GO:0009395//phospholipid catabolic process;GO:0009685//gibberellin metabolic process;GO:0010476//gibberellin mediated signaling pathway
Unigene0068709	949.853	168.733	373.667	303.747	690.99	234.403	637.047	731.453	24423.7	4213.33	8876.67	8326.67	20942.3	7633.67	17445	20077.3	CYP76AH1	cytochrome P450 CYP76AH1 [Salvia miltiorrhiza]	-	-	-	-	GO:0031090//organelle membrane;GO:0031224//intrinsic component of membrane;GO:0043231//intracellular membrane-bounded organelle	GO:0016491//oxidoreductase activity;GO:0046906//tetrapyrrole binding;GO:0046914//transition metal ion binding	GO:0044710//single-organism metabolic process
Unigene0063385	0	0.213	4.237	0	0	1.317	0	0	0	3.667	71.667	0	0	28.667	0	0	CYP76AH1	cytochrome P450 [Salvia dorisiana]	-	-	-	-	GO:0016020//membrane	GO:0005488//binding;GO:0016491//oxidoreductase activity	-
Unigene0055056	275.977	55.683	150.843	143.263	212.54	169.173	330.637	283.31	6139.67	1213.67	3099.33	3414.67	5579.67	4760.33	7825.67	6725.67	CYP76AK5	cytochrome P450 CYP76AK5 [Salvia miltiorrhiza]	-	-	-	-	-	-	-
Unigene0009184	18.69	0.213	16.463	4.317	20.453	11.067	5.123	17.39	401.667	4.333	307.333	91	511.667	285.667	112.333	381.333	CYP82G1	cytochrome P450 CYP82U4 [Salvia miltiorrhiza]	Metabolism	Metabolism of terpenoids and polyketides	ko00904//Diterpenoid biosynthesis	K17961	-	-	-
Unigene0063131	0.6	7.693	4.34	0.413	1.697	2.983	1.187	3.91	7	79.333	42.333	4	20.333	40.667	14	44.667	DHDDS	dehydrodolichyl diphosphate synthase [Capsaspora owczarzaki ATCC 30864]	Metabolism;Metabolism	Global and overview maps;Metabolism of terpenoids and polyketides	ko01110//Biosynthesis of secondary metabolites;ko00900//Terpenoid backbone biosynthesis	K11778;K11778	-	-	-
Unigene0044287	9.377	4.227	17.753	7.68	7.153	9.593	14.713	8.76	267.333	114	460.333	231	234.333	334.667	435	258	DXR	1-deoxy-D-xylulose 5-phosphate synthase 3 [Salvia officinalis]	Metabolism;Metabolism;Metabolism;Metabolism	Global and overview maps;Global and overview maps;Metabolism of terpenoids and polyketides;Metabolism of cofactors and vitamins	ko01100//Metabolic pathways;ko01110//Biosynthesis of secondary metabolites;ko00900//Terpenoid backbone biosynthesis;ko00730//Thiamine metabolism	K01662;K01662;K01662;K01662	-	GO:0016744//transferase activity, transferring aldehyde or ketonic groups	GO:0006721//terpenoid metabolic process
Unigene0025788	21.113	6.507	11.273	8.053	18.73	5.573	19.693	21.8	903.333	270	443.333	368	931.333	300.667	892.667	992.667	DXR	1-deoxy-d-xylulose 5-phosphate reductoisomerase [Salvia miltiorrhiza]	Metabolism;Metabolism;Metabolism	Global and overview maps;Global and overview maps;Metabolism of terpenoids and polyketides	ko01100//Metabolic pathways;ko01110//Biosynthesis of secondary metabolites;ko00900//Terpenoid backbone biosynthesis	K00099;K00099;K00099	GO:0009532//plastid stroma	GO:0016616//oxidoreductase activity, acting on the CH-OH group of donors, NAD or NADP as acceptor;GO:0043168//anion binding;GO:0043169//cation binding	GO:0005982//starch metabolic process;GO:0005984//disaccharide metabolic process;GO:0006090//pyruvate metabolic process;GO:0006544//glycine metabolic process;GO:0006633//fatty acid biosynthetic process;GO:0006739//NADP metabolic process;GO:0006779//porphyrin-containing compound biosynthetic process;GO:0009314//response to radiation;GO:0009694//jasmonic acid metabolic process;GO:0009893//positive r…
Unigene0046899	14.213	7.723	13.863	10.827	11.887	8.11	14.513	9.54	473.333	241.667	419	378.667	445.667	329.333	502	326.667	DXS	1-deoxy-D-xylulose-5-phosphate synthase [Salvia splendens]	Metabolism;Metabolism;Metabolism;Metabolism	Global and overview maps;Global and overview maps;Metabolism of terpenoids and polyketides;Metabolism of cofactors and vitamins	ko01100//Metabolic pathways;ko01110//Biosynthesis of secondary metabolites;ko00900//Terpenoid backbone biosynthesis;ko00730//Thiamine metabolism	K01662;K01662;K01662;K01662	GO:0009536//plastid	GO:0005488//binding;GO:0016744//transferase activity, transferring aldehyde or ketonic groups	GO:0000097//sulfur amino acid biosynthetic process;GO:0006090//pyruvate metabolic process;GO:0006355//regulation of transcription, DNA-templated;GO:0006468//protein phosphorylation;GO:0006544//glycine metabolic process;GO:0006633//fatty acid biosynthetic process;GO:0006732//coenzyme metabolic process;GO:0006753//nucleoside phosphate metabolic process;GO:0006779//porphyrin-containing compound bios…
Unigene0043107	397.047	60.563	161.11	96.987	359.75	154.803	432.173	346.553	12319	1832.67	4618	3192.67	13172.7	6057.67	14160.7	11450.3	DXS	1-deoxy-D-xylulose-5-phosphate synthase [Salvia splendens]	Metabolism;Metabolism;Metabolism;Metabolism	Global and overview maps;Global and overview maps;Metabolism of terpenoids and polyketides;Metabolism of cofactors and vitamins	ko01100//Metabolic pathways;ko01110//Biosynthesis of secondary metabolites;ko00900//Terpenoid backbone biosynthesis;ko00730//Thiamine metabolism	K01662;K01662;K01662;K01662	-	GO:0016744//transferase activity, transferring aldehyde or ketonic groups	GO:0006721//terpenoid metabolic process
Unigene0033102	1.14	0.113	0.447	0.273	0.56	0.62	1.05	0.47	21.667	2	7.333	5.667	11.667	14	19.667	9	DXS	probable 1-deoxy-D-xylulose-5-phosphate synthase, chloroplastic [Coffea arabica]	Metabolism;Metabolism;Metabolism;Metabolism	Global and overview maps;Global and overview maps;Metabolism of terpenoids and polyketides;Metabolism of cofactors and vitamins	ko01100//Metabolic pathways;ko01110//Biosynthesis of secondary metabolites;ko00900//Terpenoid backbone biosynthesis;ko00730//Thiamine metabolism	K01662;K01662;K01662;K01662	GO:0009532//plastid stroma	GO:0016744//transferase activity, transferring aldehyde or ketonic groups;GO:0043169//cation binding	GO:0000097//sulfur amino acid biosynthetic process;GO:0006090//pyruvate metabolic process;GO:0006355//regulation of transcription, DNA-templated;GO:0006468//protein phosphorylation;GO:0006544//glycine metabolic process;GO:0006633//fatty acid biosynthetic process;GO:0006732//coenzyme metabolic process;GO:0006753//nucleoside phosphate metabolic process;GO:0006772//thiamine metabolic process;GO:0006…
Unigene0033101	0.62	0	0.173	0.343	0.313	0.563	0.617	0.147	5.667	0	1.333	3.333	3	6	5.667	1.333	DXS	1-deoxy-D-xylulose-5-phosphate synthase decarboxylase [Prunella vulgaris]	Metabolism;Metabolism;Metabolism;Metabolism	Global and overview maps;Global and overview maps;Metabolism of terpenoids and polyketides;Metabolism of cofactors and vitamins	ko01100//Metabolic pathways;ko01110//Biosynthesis of secondary metabolites;ko00900//Terpenoid backbone biosynthesis;ko00730//Thiamine metabolism	K01662;K01662;K01662;K01662	GO:0009532//plastid stroma	GO:0016744//transferase activity, transferring aldehyde or ketonic groups;GO:0043169//cation binding	GO:0000097//sulfur amino acid biosynthetic process;GO:0006090//pyruvate metabolic process;GO:0006355//regulation of transcription, DNA-templated;GO:0006468//protein phosphorylation;GO:0006544//glycine metabolic process;GO:0006633//fatty acid biosynthetic process;GO:0006732//coenzyme metabolic process;GO:0006753//nucleoside phosphate metabolic process;GO:0006772//thiamine metabolic process;GO:0006…
Unigene0062352	2.327	1.29	5.373	2.443	4.823	2.983	3.883	4.33	85.333	43.667	174.333	91.667	199.333	132	146	161.667	DXS	1-deoxy-D-xylulose 5-phosphate synthase [Salvia miltiorrhiza]	Metabolism;Metabolism;Metabolism;Metabolism	Global and overview maps;Global and overview maps;Metabolism of terpenoids and polyketides;Metabolism of cofactors and vitamins	ko01100//Metabolic pathways;ko01110//Biosynthesis of secondary metabolites;ko00900//Terpenoid backbone biosynthesis;ko00730//Thiamine metabolism	K01662;K01662;K01662;K01662	GO:0009532//plastid stroma	GO:0016744//transferase activity, transferring aldehyde or ketonic groups;GO:0043169//cation binding	GO:0000097//sulfur amino acid biosynthetic process;GO:0006090//pyruvate metabolic process;GO:0006355//regulation of transcription, DNA-templated;GO:0006468//protein phosphorylation;GO:0006544//glycine metabolic process;GO:0006633//fatty acid biosynthetic process;GO:0006732//coenzyme metabolic process;GO:0006753//nucleoside phosphate metabolic process;GO:0006772//thiamine metabolic process;GO:0006…
Unigene0009456	43.167	18.343	32.68	41.647	30.19	18.217	32.33	30.74	879.667	349.667	602	891.333	697	452.667	683.333	644	FACE1	STE24 endopeptidase [Salvia splendens]	Metabolism;Metabolism	Global and overview maps;Metabolism of terpenoids and polyketides	ko01110//Biosynthesis of secondary metabolites;ko00900//Terpenoid backbone biosynthesis	K06013;K06013	GO:0031090//organelle membrane;GO:0031224//intrinsic component of membrane;GO:0043231//intracellular membrane-bounded organelle	GO:0004175//endopeptidase activity;GO:0043169//cation binding	GO:0016482//cytoplasmic transport;GO:0016485//protein processing;GO:0044267//cellular protein metabolic process
Unigene0006753	5.937	1.593	5.58	5.41	4.233	2.203	4.217	3.07	170.333	42	142	160.667	134.333	75.667	123.667	89	FACE2	prenyl protein peptidase [Salvia splendens]	Metabolism;Metabolism	Global and overview maps;Metabolism of terpenoids and polyketides	ko01110//Biosynthesis of secondary metabolites;ko00900//Terpenoid backbone biosynthesis	K08658;K08658	GO:0043231//intracellular membrane-bounded organelle;GO:0044425//membrane part	GO:0003824//catalytic activity	GO:0006508//proteolysis
Unigene0069622	29.273	12.777	21.237	25.117	35.423	16.397	28.023	24.527	645	261	419.333	567	864.333	436	631	549.667	FLCY	prenylcysteine oxidase / farnesylcysteine lyase [Salvia splendens]	Metabolism;Metabolism	Global and overview maps;Metabolism of terpenoids and polyketides	ko01110//Biosynthesis of secondary metabolites;ko00900//Terpenoid backbone biosynthesis	K05906;K05906	-	-	-
Unigene0018863	0.767	9	4.84	0.623	1.75	3.647	1.27	3.08	11	115.333	58.667	7.667	26.333	61.667	18	43.667	Fnta	protein farnesyltransferase geranylgeranyltransferase type-1 subunit alpha [Klebsormidium nitens]	Metabolism;Metabolism	Global and overview maps;Metabolism of terpenoids and polyketides	ko01110//Biosynthesis of secondary metabolites;ko00900//Terpenoid backbone biosynthesis	K05955;K05955	GO:0044444//cytoplasmic part	GO:0005515//protein binding;GO:0008318//protein prenyltransferase activity	GO:0001101//response to acid chemical;GO:0010035//response to inorganic substance;GO:0018342//protein prenylation;GO:0044763//single-organism cellular process;GO:0044767//single-organism developmental process;GO:0048856//anatomical structure development;GO:0050793//regulation of developmental process;GO:0050794//regulation of cellular process;GO:1901700//response to oxygen-containing compound
Unigene0016090	0.753	9.893	5.527	0.37	1.723	4.22	1.633	3.44	11.333	133	70	4.667	27	74.667	24.333	51	FNTB	farnesyl transferase [Capsaspora owczarzaki ATCC 30864]	Metabolism;Metabolism	Global and overview maps;Metabolism of terpenoids and polyketides	ko01110//Biosynthesis of secondary metabolites;ko00900//Terpenoid backbone biosynthesis	K05954;K05954	GO:0044444//cytoplasmic part	GO:0005488//binding;GO:0008318//protein prenyltransferase activity	GO:0006464//cellular protein modification process;GO:0006625//protein targeting to peroxisome;GO:0006950//response to stress;GO:0009062//fatty acid catabolic process;GO:0009787//regulation of abscisic acid-activated signaling pathway;GO:0009933//meristem structural organization
Unigene0041875	29.347	9.623	16.457	16.337	18.347	8.62	14.813	13.097	639.333	200	330.667	377.667	458.667	233.333	340.667	299	FOLK	farnesol kinase [Salvia splendens]	Metabolism;Metabolism	Global and overview maps;Metabolism of terpenoids and polyketides	ko01110//Biosynthesis of secondary metabolites;ko00900//Terpenoid backbone biosynthesis	K15892;K15892	GO:0031224//intrinsic component of membrane;GO:0042170//plastid membrane	GO:0052668//farnesol kinase activity	GO:0001101//response to acid chemical;GO:0006714//sesquiterpenoid metabolic process;GO:0006796//phosphate-containing compound metabolic process;GO:0018130//heterocycle biosynthetic process;GO:0018205//peptidyl-lysine modification;GO:0042743//hydrogen peroxide metabolic process;GO:0048437//floral organ development
Unigene0008759	0.46	7.847	4.61	0.267	1.95	2.747	1.027	2.933	7	104	57.667	3.333	30	48	15.333	43	FPS	farnesyl diphosphate synthase [Chlamydomonas reinhardtii]	Metabolism;Metabolism;Metabolism	Global and overview maps;Global and overview maps;Metabolism of terpenoids and polyketides	ko01100//Metabolic pathways;ko01110//Biosynthesis of secondary metabolites;ko00900//Terpenoid backbone biosynthesis	K00787;K00787;K00787	GO:0044444//cytoplasmic part	GO:0004659//prenyltransferase activity	GO:0006694//steroid biosynthetic process;GO:0008654//phospholipid biosynthetic process;GO:0046165//alcohol biosynthetic process
Unigene0004005	15.403	9.777	11.737	13.293	14.643	9.99	17.197	9.47	65	39.667	46	59.667	71.333	53	78.333	42.333	FTA	protein farnesyltransferase/geranylgeranyltransferase type-1 subunit alpha [Salvia splendens]	Metabolism;Metabolism	Global and overview maps;Metabolism of terpenoids and polyketides	ko01110//Biosynthesis of secondary metabolites;ko00900//Terpenoid backbone biosynthesis	K05955;K05955	GO:0043231//intracellular membrane-bounded organelle;GO:0044444//cytoplasmic part	GO:0004661//protein geranylgeranyltransferase activity;GO:0046983//protein dimerization activity	GO:0006950//response to stress;GO:0009787//regulation of abscisic acid-activated signaling pathway;GO:0018342//protein prenylation;GO:0022604//regulation of cell morphogenesis;GO:0048507//meristem development
Unigene0003010	15.46	9.76	13.07	9.977	10.34	6.943	14.993	7.64	292	173.333	223.333	199.667	221.667	161	297.333	149.333	FTA	protein farnesyltransferase/geranylgeranyltransferase type-1 subunit alpha [Salvia splendens]	Metabolism;Metabolism	Global and overview maps;Metabolism of terpenoids and polyketides	ko01110//Biosynthesis of secondary metabolites;ko00900//Terpenoid backbone biosynthesis	K05955;K05955	GO:0043231//intracellular membrane-bounded organelle;GO:0044444//cytoplasmic part	GO:0004661//protein geranylgeranyltransferase activity;GO:0046983//protein dimerization activity	GO:0006950//response to stress;GO:0009787//regulation of abscisic acid-activated signaling pathway;GO:0010035//response to inorganic substance;GO:0018342//protein prenylation;GO:0022604//regulation of cell morphogenesis;GO:0048507//meristem development
Unigene0012170	0.56	0.04	0.903	0.253	0.35	0.407	0.903	0.48	4.667	0.333	7	2.333	3.333	4.333	8	4.333	GA20OX1	gibberellin biosynthesis-related protein GA20ox1 [Salvia miltiorrhiza]	Metabolism;Metabolism;Metabolism	Global and overview maps;Global and overview maps;Metabolism of terpenoids and polyketides	ko01100//Metabolic pathways;ko01110//Biosynthesis of secondary metabolites;ko00904//Diterpenoid biosynthesis	K05282;K05282;K05282	GO:0044424//intracellular part	GO:0016706//oxidoreductase activity, acting on paired donors, with incorporation or reduction of molecular oxygen, 2-oxoglutarate as one donor, and incorporation of one atom each of oxygen into both donors;GO:0043169//cation binding	GO:0000902//cell morphogenesis;GO:0009685//gibberellin metabolic process;GO:0009687//abscisic acid metabolic process;GO:0010476//gibberellin mediated signaling pathway;GO:0048572//short-day photoperiodism;GO:0048827//phyllome development;GO:0090567//reproductive shoot system development
Unigene0069759	3.31	1.293	11.16	7.473	2.357	1.9	5.66	5.957	62.333	23.667	199	156.333	51.333	44.333	112	117.333	GA20ox1B	gibberellin biosynthesis-related protein GA20ox2 [Salvia miltiorrhiza]	Metabolism;Metabolism;Metabolism	Global and overview maps;Global and overview maps;Metabolism of terpenoids and polyketides	ko01100//Metabolic pathways;ko01110//Biosynthesis of secondary metabolites;ko00904//Diterpenoid biosynthesis	K05282;K05282;K05282	GO:0044424//intracellular part	GO:0016706//oxidoreductase activity, acting on paired donors, with incorporation or reduction of molecular oxygen, 2-oxoglutarate as one donor, and incorporation of one atom each of oxygen into both donors;GO:0043169//cation binding	GO:0000902//cell morphogenesis;GO:0009685//gibberellin metabolic process;GO:0009687//abscisic acid metabolic process;GO:0010476//gibberellin mediated signaling pathway;GO:0048572//short-day photoperiodism;GO:0048827//phyllome development;GO:0090567//reproductive shoot system development
Unigene0065658	0.857	0	0.13	0.127	2.283	0.02	0.67	0.477	12.667	0	1.667	2	35.667	0.333	9.667	7	GA20OX2	gibberellin biosynthesis-related protein GA20ox5 [Salvia miltiorrhiza]	Metabolism;Metabolism;Metabolism	Global and overview maps;Global and overview maps;Metabolism of terpenoids and polyketides	ko01100//Metabolic pathways;ko01110//Biosynthesis of secondary metabolites;ko00904//Diterpenoid biosynthesis	K05282;K05282;K05282	-	GO:0016706//oxidoreductase activity, acting on paired donors, with incorporation or reduction of molecular oxygen, 2-oxoglutarate as one donor, and incorporation of one atom each of oxygen into both donors;GO:0043169//cation binding	GO:0044710//single-organism metabolic process
Unigene0037073	0.547	4.287	1.21	0.303	0.91	3.437	2.003	0.48	10	74	19.667	5.667	18.667	76	39	9	GA20OX2	gibberellin biosynthesis-related protein GA20ox4 [Salvia miltiorrhiza]	Metabolism;Metabolism;Metabolism	Global and overview maps;Global and overview maps;Metabolism of terpenoids and polyketides	ko01100//Metabolic pathways;ko01110//Biosynthesis of secondary metabolites;ko00904//Diterpenoid biosynthesis	K05282;K05282;K05282	GO:0044424//intracellular part	GO:0016706//oxidoreductase activity, acting on paired donors, with incorporation or reduction of molecular oxygen, 2-oxoglutarate as one donor, and incorporation of one atom each of oxygen into both donors;GO:0043169//cation binding	GO:0000902//cell morphogenesis;GO:0001101//response to acid chemical;GO:0009416//response to light stimulus;GO:0009685//gibberellin metabolic process;GO:0090567//reproductive shoot system development
Unigene0067238	3.33	1.95	1.677	2.37	2.113	1.227	1	1.807	86.333	47.333	39.667	65.333	63.333	39.333	26.667	48.667	GA2OX1	gibberellin biosynthesis-related protein GA2ox10 [Salvia miltiorrhiza]	Metabolism;Metabolism	Global and overview maps;Metabolism of terpenoids and polyketides	ko01110//Biosynthesis of secondary metabolites;ko00904//Diterpenoid biosynthesis	K04125;K04125	GO:0044424//intracellular part	GO:0045543//gibberellin 2-beta-dioxygenase activity;GO:0046872//metal ion binding	GO:0001101//response to acid chemical;GO:0009639//response to red or far red light;GO:0009685//gibberellin metabolic process;GO:0032787//monocarboxylic acid metabolic process
Unigene0041596	0	0	0	0	0.11	0.05	0.553	0.06	0	0	0	0	0.667	0.333	3	0.333	GA2OX1	gibberellin biosynthesis-related protein GA2ox2 [Salvia miltiorrhiza]	Metabolism;Metabolism	Global and overview maps;Metabolism of terpenoids and polyketides	ko01110//Biosynthesis of secondary metabolites;ko00904//Diterpenoid biosynthesis	K04125;K04125	GO:0044424//intracellular part	GO:0045543//gibberellin 2-beta-dioxygenase activity;GO:0046914//transition metal ion binding	GO:0009685//gibberellin metabolic process
Unigene0007052	17.583	47.093	12.16	3.397	27.673	0.747	3.4	5.407	530.667	1354	330.667	105	971.333	28	120	172.333	GA2OX1	Iron/ascorbate family oxidoreductase [Handroanthus impetiginosus]	Metabolism;Metabolism	Global and overview maps;Metabolism of terpenoids and polyketides	ko01110//Biosynthesis of secondary metabolites;ko00904//Diterpenoid biosynthesis	K04125;K04125	GO:0044424//intracellular part	GO:0045543//gibberellin 2-beta-dioxygenase activity;GO:0046872//metal ion binding	GO:0001101//response to acid chemical;GO:0009639//response to red or far red light;GO:0009685//gibberellin metabolic process;GO:0032787//monocarboxylic acid metabolic process
Unigene0012648	5.53	0.853	8.563	3.293	7.357	1.203	3.54	4.76	85.333	13	122.333	54	131	23.667	58	78.667	GA2OX2	gibberellin biosynthesis-related protein GA2ox8 [Salvia miltiorrhiza]	Metabolism;Metabolism	Global and overview maps;Metabolism of terpenoids and polyketides	ko01110//Biosynthesis of secondary metabolites;ko00904//Diterpenoid biosynthesis	K04125;K04125	-	GO:0045543//gibberellin 2-beta-dioxygenase activity;GO:0046872//metal ion binding	GO:0009408//response to heat;GO:0009416//response to light stimulus;GO:0009685//gibberellin metabolic process;GO:0044711//single-organism biosynthetic process;GO:1901576//organic substance biosynthetic process
Unigene0005534	10.547	0.22	0.723	0.44	5.09	0.607	2.013	0.87	146.333	3	9.333	6.667	83.667	10.667	29.667	13	GA2OX4	gibberellin biosynthesis-related protein GA2ox9 [Salvia miltiorrhiza]	Metabolism;Metabolism	Global and overview maps;Metabolism of terpenoids and polyketides	ko01110//Biosynthesis of secondary metabolites;ko00904//Diterpenoid biosynthesis	K04125;K04125	-	GO:0045543//gibberellin 2-beta-dioxygenase activity	GO:0009408//response to heat;GO:0009416//response to light stimulus;GO:0009685//gibberellin metabolic process
Unigene0048883	0.457	0.03	0.273	0.903	0.583	0.34	0.36	0.67	5.667	0.333	3	12.333	7.667	5	4.667	8.333	GA2OX8	gibberellin biosynthesis-related protein GA2ox6 [Salvia miltiorrhiza]	Metabolism;Metabolism	Global and overview maps;Metabolism of terpenoids and polyketides	ko01110//Biosynthesis of secondary metabolites;ko00904//Diterpenoid biosynthesis	K04125;K04125	-	GO:0043169//cation binding;GO:0045543//gibberellin 2-beta-dioxygenase activity	GO:0009685//gibberellin metabolic process
Unigene0011872	4	2.273	1.717	1.633	1.93	0.21	1.38	0.603	62	33	23.667	27	34.333	4	23	9.667	GA3OX1	gibberellin biosynthesis-related protein GA3ox1 [Salvia miltiorrhiza]	Metabolism;Metabolism;Metabolism	Global and overview maps;Global and overview maps;Metabolism of terpenoids and polyketides	ko01100//Metabolic pathways;ko01110//Biosynthesis of secondary metabolites;ko00904//Diterpenoid biosynthesis	K04124;K04124;K04124	GO:0044424//intracellular part	GO:0005515//protein binding;GO:0016706//oxidoreductase activity, acting on paired donors, with incorporation or reduction of molecular oxygen, 2-oxoglutarate as one donor, and incorporation of one atom each of oxygen into both donors	GO:0009639//response to red or far red light;GO:0009685//gibberellin metabolic process;GO:0010476//gibberellin mediated signaling pathway
Unigene0067296	10.153	0.02	0.04	0.02	1.667	0.123	0.083	0.09	189.667	0.333	0.667	0.333	32.667	2.667	1.667	1.667	GA3OX2	gibberellin biosynthesis-related protein GA3ox2 [Salvia miltiorrhiza]	Metabolism;Metabolism;Metabolism	Global and overview maps;Global and overview maps;Metabolism of terpenoids and polyketides	ko01100//Metabolic pathways;ko01110//Biosynthesis of secondary metabolites;ko00904//Diterpenoid biosynthesis	K04124;K04124;K04124	GO:0044424//intracellular part	GO:0005515//protein binding;GO:0016706//oxidoreductase activity, acting on paired donors, with incorporation or reduction of molecular oxygen, 2-oxoglutarate as one donor, and incorporation of one atom each of oxygen into both donors;GO:0043169//cation binding	GO:0003006//developmental process involved in reproduction;GO:0006996//organelle organization;GO:0009062//fatty acid catabolic process;GO:0009409//response to cold;GO:0009639//response to red or far red light;GO:0009685//gibberellin metabolic process;GO:0009756//carbohydrate mediated signaling;GO:0010476//gibberellin mediated signaling pathway;GO:0032446//protein modification by small protein con…
Unigene0023767	2.617	0.077	2.53	1.94	3.81	0.717	0.38	6.327	36.667	1	31.333	27	59.667	12.333	5.333	91.667	GGPPS.SSUI	geranyl diphosphate synthase small subunit type I [Salvia miltiorrhiza]	Metabolism;Metabolism;Metabolism	Global and overview maps;Global and overview maps;Metabolism of terpenoids and polyketides	ko01100//Metabolic pathways;ko01110//Biosynthesis of secondary metabolites;ko00900//Terpenoid backbone biosynthesis	K13789;K13789;K13789	GO:0009536//plastid	GO:0004659//prenyltransferase activity;GO:0005488//binding	GO:0008299//isoprenoid biosynthetic process
Unigene0034340	47.03	5.917	13.193	8.073	38.72	8.047	40.92	44.923	1018.67	125.667	262	183.333	990.667	221.333	944.333	1042.67	GGPPS.SSUII.1	geranyl diphosphate synthase small subunit type II.1 [Salvia miltiorrhiza]	Metabolism;Metabolism;Metabolism	Global and overview maps;Global and overview maps;Metabolism of terpenoids and polyketides	ko01100//Metabolic pathways;ko01110//Biosynthesis of secondary metabolites;ko00900//Terpenoid backbone biosynthesis	K13789;K13789;K13789	GO:0009536//plastid	GO:0004659//prenyltransferase activity;GO:0005488//binding	GO:0016114//terpenoid biosynthetic process
Unigene0002107	17.853	7.523	13.837	10.247	15.06	11.527	14.143	9.55	275	109.667	193	166	264	217.333	227	152.333	GGPPS.SSUII.2	geranyl diphosphate synthase small subunit type II.2 [Salvia miltiorrhiza]	Metabolism;Metabolism;Metabolism	Global and overview maps;Global and overview maps;Metabolism of terpenoids and polyketides	ko01100//Metabolic pathways;ko01110//Biosynthesis of secondary metabolites;ko00900//Terpenoid backbone biosynthesis	K13789;K13789;K13789	GO:0009536//plastid	GO:0004659//prenyltransferase activity;GO:0016628//oxidoreductase activity, acting on the CH-CH group of donors, NAD or NADP as acceptor;GO:0043169//cation binding	GO:0016114//terpenoid biosynthetic process;GO:0019758//glycosinolate biosynthetic process
Unigene0009356	9.563	4.347	8.04	4.967	8.787	3.563	5.927	4.58	144	63	110	79	153.667	67.333	97.333	73	GGPPS1	geranyl diphosphate synthase large subunit [Salvia miltiorrhiza]	Metabolism;Metabolism;Metabolism	Global and overview maps;Global and overview maps;Metabolism of terpenoids and polyketides	ko01100//Metabolic pathways;ko01110//Biosynthesis of secondary metabolites;ko00900//Terpenoid backbone biosynthesis	K13789;K13789;K13789	GO:0009532//plastid stroma	GO:0004659//prenyltransferase activity;GO:0016628//oxidoreductase activity, acting on the CH-CH group of donors, NAD or NADP as acceptor;GO:0043169//cation binding	GO:0008654//phospholipid biosynthetic process;GO:0016109//tetraterpenoid biosynthetic process;GO:0019758//glycosinolate biosynthetic process
Unigene0009355	0.667	0.127	1.25	0.85	0.453	0.3	2.277	1.347	5.667	1	9	7	4	3	18.333	11.333	GGPPS1	geranylgeranyl diphosphate synthase 2 [Salvia miltiorrhiza]	Metabolism;Metabolism;Metabolism	Global and overview maps;Global and overview maps;Metabolism of terpenoids and polyketides	ko01100//Metabolic pathways;ko01110//Biosynthesis of secondary metabolites;ko00900//Terpenoid backbone biosynthesis	K13789;K13789;K13789	GO:0009532//plastid stroma	GO:0004659//prenyltransferase activity;GO:0016628//oxidoreductase activity, acting on the CH-CH group of donors, NAD or NADP as acceptor;GO:0043169//cation binding	GO:0008654//phospholipid biosynthetic process;GO:0016109//tetraterpenoid biosynthetic process;GO:0019758//glycosinolate biosynthetic process
Unigene0009354	0.053	0.063	0.27	0.07	0.497	0.193	1.257	0.35	0.333	0.333	1.333	0.333	3	1.333	7	2	GGPPS1	geranylgeranyl diphosphate synthase 2 [Salvia miltiorrhiza]	Metabolism;Metabolism;Metabolism	Global and overview maps;Global and overview maps;Metabolism of terpenoids and polyketides	ko01100//Metabolic pathways;ko01110//Biosynthesis of secondary metabolites;ko00900//Terpenoid backbone biosynthesis	K13789;K13789;K13789	GO:0009536//plastid	GO:0004659//prenyltransferase activity;GO:0016628//oxidoreductase activity, acting on the CH-CH group of donors, NAD or NADP as acceptor;GO:0043169//cation binding	GO:0008654//phospholipid biosynthetic process;GO:0016109//tetraterpenoid biosynthetic process
Unigene0021380	7.163	3.197	6.55	6.197	7.317	2.587	9.693	6.09	147.667	63.333	123.667	130.667	170.333	66	210	131	GGPS	geranylgeranyl diphosphate synthase 3 [Salvia miltiorrhiza]	Metabolism;Metabolism;Metabolism	Global and overview maps;Global and overview maps;Metabolism of terpenoids and polyketides	ko01100//Metabolic pathways;ko01110//Biosynthesis of secondary metabolites;ko00900//Terpenoid backbone biosynthesis	K13789;K13789;K13789	GO:0009536//plastid	GO:0004659//prenyltransferase activity;GO:0005488//binding	GO:0008654//phospholipid biosynthetic process;GO:0016114//terpenoid biosynthetic process;GO:0019758//glycosinolate biosynthetic process
Unigene0028821	57.31	17.093	25.397	21.6	63.767	14.11	51.15	67.147	1288	374.667	529	532	1694	402.667	1226.33	1616.33	GGPS1	geranylgeranyl diphosphate synthase [Salvia miltiorrhiza]	Metabolism;Metabolism;Metabolism	Global and overview maps;Global and overview maps;Metabolism of terpenoids and polyketides	ko01100//Metabolic pathways;ko01110//Biosynthesis of secondary metabolites;ko00900//Terpenoid backbone biosynthesis	K13789;K13789;K13789	GO:0009532//plastid stroma	GO:0004659//prenyltransferase activity;GO:0016491//oxidoreductase activity;GO:0043169//cation binding	GO:0008654//phospholipid biosynthetic process;GO:0016109//tetraterpenoid biosynthetic process;GO:0019758//glycosinolate biosynthetic process
Unigene0026550	3.79	1.513	4.157	4.053	2.94	1.68	3.35	3.543	170.333	65	172.667	194.333	151.667	93.667	157.667	166.333	GGR	geranylgeranyl reductase [Salvia splendens]	Metabolism;Metabolism;Metabolism;Metabolism	Global and overview maps;Global and overview maps;Metabolism of terpenoids and polyketides;Metabolism of cofactors and vitamins	ko01100//Metabolic pathways;ko01110//Biosynthesis of secondary metabolites;ko00900//Terpenoid backbone biosynthesis;ko00860//Porphyrin and chlorophyll metabolism	K10960;K10960;K10960;K10960	GO:0031976//plastid thylakoid;GO:0042170//plastid membrane;GO:0044434//chloroplast part	GO:0005488//binding;GO:0016627//oxidoreductase activity, acting on the CH-CH group of donors	GO:0000097//sulfur amino acid biosynthetic process;GO:0006091//generation of precursor metabolites and energy;GO:0006779//porphyrin-containing compound biosynthetic process;GO:0031399//regulation of protein modification process
Unigene0024349	1.187	0.197	3.423	0.233	2.847	0.48	3.65	2.103	26.333	4	66.667	4.667	70.333	13	89	48	GGR	geranylgeranyl reductase [Salvia splendens]	Metabolism;Metabolism;Metabolism;Metabolism	Global and overview maps;Global and overview maps;Metabolism of terpenoids and polyketides;Metabolism of cofactors and vitamins	ko01100//Metabolic pathways;ko01110//Biosynthesis of secondary metabolites;ko00900//Terpenoid backbone biosynthesis;ko00860//Porphyrin and chlorophyll metabolism	K10960;K10960;K10960;K10960	GO:0031976//plastid thylakoid;GO:0042170//plastid membrane;GO:0044434//chloroplast part	GO:0005488//binding;GO:0016627//oxidoreductase activity, acting on the CH-CH group of donors	GO:0000097//sulfur amino acid biosynthetic process;GO:0006091//generation of precursor metabolites and energy;GO:0006779//porphyrin-containing compound biosynthetic process;GO:0031399//regulation of protein modification process
Unigene0014877	15.37	7.977	16.377	22.367	7.207	7.423	19.833	13.683	576.333	279.667	553.667	884.333	304.667	336.333	771.667	523.667	HDR/At4g37920	4-hydroxy-3-methylbut-2-enyl diphosphatereductase [Striga asiatica]	-	-	-	-	GO:0044434//chloroplast part	-	GO:0008652//cellular amino acid biosynthetic process
Unigene0007503	3.303	0.193	1.363	1.87	3.29	0.37	1.32	2.41	89.667	5	33.333	50	100	12.333	37	68	HMGR	3-hydroxy-3-methylglutaryl-coenzyme A reductase 4 [Salvia miltiorrhiza]	Metabolism;Metabolism;Metabolism	Global and overview maps;Global and overview maps;Metabolism of terpenoids and polyketides	ko01100//Metabolic pathways;ko01110//Biosynthesis of secondary metabolites;ko00900//Terpenoid backbone biosynthesis	K00021;K00021;K00021	GO:0031090//organelle membrane;GO:0031224//intrinsic component of membrane;GO:0043231//intracellular membrane-bounded organelle	GO:0000166//nucleotide binding;GO:0016616//oxidoreductase activity, acting on the CH-OH group of donors, NAD or NADP as acceptor;GO:0048037//cofactor binding	GO:0006084//acetyl-CoA metabolic process;GO:0006694//steroid biosynthetic process;GO:0006722//triterpenoid metabolic process;GO:0006970//response to osmotic stress;GO:0006996//organelle organization;GO:0009699//phenylpropanoid biosynthetic process;GO:0060147//regulation of posttranscriptional gene silencing;GO:0070838//divalent metal ion transport
Unigene0007502	46.517	3.35	47.16	37.29	42.373	14.363	41.513	46.633	1330.33	91.667	1240.33	1118	1366.67	507	1229	1387	HMGR	3-hydroxy-3-methylglutaryl-coenzyme A reductase [Salvia miltiorrhiza]	Metabolism;Metabolism;Metabolism	Global and overview maps;Global and overview maps;Metabolism of terpenoids and polyketides	ko01100//Metabolic pathways;ko01110//Biosynthesis of secondary metabolites;ko00900//Terpenoid backbone biosynthesis	K00021;K00021;K00021	GO:0009526//plastid envelope;GO:0031090//organelle membrane;GO:0031224//intrinsic component of membrane	GO:0000166//nucleotide binding;GO:0016616//oxidoreductase activity, acting on the CH-OH group of donors, NAD or NADP as acceptor;GO:0048037//cofactor binding	GO:0006084//acetyl-CoA metabolic process;GO:0006694//steroid biosynthetic process;GO:0006722//triterpenoid metabolic process;GO:0006970//response to osmotic stress;GO:0006996//organelle organization;GO:0009699//phenylpropanoid biosynthetic process;GO:0060147//regulation of posttranscriptional gene silencing;GO:0070838//divalent metal ion transport
Unigene0026353	1.01	14.94	6.993	0.413	2.703	4.9	1.647	5.227	26.333	343.333	152	9	73	148.667	42.667	133	HMGR	3-hydroxy-3-methylglutaryl-coenzyme A reductase 3-like protein [Carex littledalei]	Metabolism;Metabolism;Metabolism	Global and overview maps;Global and overview maps;Metabolism of terpenoids and polyketides	ko01100//Metabolic pathways;ko01110//Biosynthesis of secondary metabolites;ko00900//Terpenoid backbone biosynthesis	K00021;K00021;K00021	-	-	-
Unigene0054560	58.663	116.567	105.223	91.1	39.167	25.133	78.397	29.903	1373.33	2565.33	2226	2330.33	1035	721.333	1921.67	725	HMGR1	3-hydroxy-3-methylglutaryl-coenzyme A reductase 1 [Salvia miltiorrhiza]	Metabolism;Metabolism;Metabolism	Global and overview maps;Global and overview maps;Metabolism of terpenoids and polyketides	ko01100//Metabolic pathways;ko01110//Biosynthesis of secondary metabolites;ko00900//Terpenoid backbone biosynthesis	K00021;K00021;K00021	GO:0009526//plastid envelope;GO:0031090//organelle membrane;GO:0031224//intrinsic component of membrane	GO:0000166//nucleotide binding;GO:0016616//oxidoreductase activity, acting on the CH-OH group of donors, NAD or NADP as acceptor;GO:0048037//cofactor binding	GO:0006084//acetyl-CoA metabolic process;GO:0006694//steroid biosynthetic process;GO:0006722//triterpenoid metabolic process;GO:0006970//response to osmotic stress;GO:0006996//organelle organization;GO:0009699//phenylpropanoid biosynthetic process;GO:0060147//regulation of posttranscriptional gene silencing;GO:0070838//divalent metal ion transport
Unigene0060248	7.343	22.043	14.803	7.367	14.69	3.177	3.077	4.353	27.333	78	50.333	29	61.667	14.667	12.667	17	HMGR2	3-hydroxy-3-methylglutaryl-coenzyme A reductase 3 [Salvia miltiorrhiza]	Metabolism;Metabolism;Metabolism	Global and overview maps;Global and overview maps;Metabolism of terpenoids and polyketides	ko01100//Metabolic pathways;ko01110//Biosynthesis of secondary metabolites;ko00900//Terpenoid backbone biosynthesis	K00021;K00021;K00021	GO:0009526//plastid envelope;GO:0031090//organelle membrane;GO:0031224//intrinsic component of membrane	GO:0000166//nucleotide binding;GO:0016616//oxidoreductase activity, acting on the CH-OH group of donors, NAD or NADP as acceptor;GO:0048037//cofactor binding	GO:0006694//steroid biosynthetic process;GO:0006722//triterpenoid metabolic process;GO:0006732//coenzyme metabolic process
Unigene0054559	274.29	164.963	285.917	111.79	287.38	28.537	66.58	89.403	6488	3754.33	6121.33	2804.67	7951.33	842.333	1723.67	2232.67	HMGR3	3-hydroxy-3-methylglutaryl-coenzyme A reductase 3 [Salvia miltiorrhiza]	Metabolism;Metabolism;Metabolism	Global and overview maps;Global and overview maps;Metabolism of terpenoids and polyketides	ko01100//Metabolic pathways;ko01110//Biosynthesis of secondary metabolites;ko00900//Terpenoid backbone biosynthesis	K00021;K00021;K00021	GO:0009526//plastid envelope;GO:0031090//organelle membrane;GO:0031224//intrinsic component of membrane	GO:0000166//nucleotide binding;GO:0016616//oxidoreductase activity, acting on the CH-OH group of donors, NAD or NADP as acceptor;GO:0048037//cofactor binding	GO:0006084//acetyl-CoA metabolic process;GO:0006694//steroid biosynthetic process;GO:0006722//triterpenoid metabolic process;GO:0006970//response to osmotic stress;GO:0006996//organelle organization;GO:0009699//phenylpropanoid biosynthetic process;GO:0060147//regulation of posttranscriptional gene silencing;GO:0070838//divalent metal ion transport
Unigene0027558	0	0.663	0	0	0	0	0	0	0	2.667	0	0	0	0	0	0	HMGS	HMG-CoA synthase-like protein, partial [Brassica rapa]	Metabolism;Metabolism;Metabolism;Metabolism;Metabolism;Metabolism	Global and overview maps;Global and overview maps;Amino acid metabolism;Metabolism of terpenoids and polyketides;Carbohydrate metabolism;Lipid metabolism	ko01100//Metabolic pathways;ko01110//Biosynthesis of secondary metabolites;ko00280//Valine, leucine and isoleucine degradation;ko00900//Terpenoid backbone biosynthesis;ko00650//Butanoate metabolism;ko00072//Synthesis and degradation of ketone bodies	K01641;K01641;K01641;K01641;K01641;K01641	-	GO:0016740//transferase activity	GO:0008610//lipid biosynthetic process;GO:0044237//cellular metabolic process
Unigene0057660	54.567	130.637	38.237	51.757	49.88	18.9	23.64	34.64	1335.33	2980	834.333	1329.67	1364.67	563.667	598	871.667	HMGS	3-hydroxy-3-methylglutaryl coenzyme A synthase [Salvia miltiorrhiza]	Metabolism;Metabolism;Metabolism;Metabolism;Metabolism;Metabolism	Global and overview maps;Global and overview maps;Amino acid metabolism;Metabolism of terpenoids and polyketides;Carbohydrate metabolism;Lipid metabolism	ko01100//Metabolic pathways;ko01110//Biosynthesis of secondary metabolites;ko00280//Valine, leucine and isoleucine degradation;ko00900//Terpenoid backbone biosynthesis;ko00650//Butanoate metabolism;ko00072//Synthesis and degradation of ketone bodies	K01641;K01641;K01641;K01641;K01641;K01641	GO:0005911//cell-cell junction;GO:0044444//cytoplasmic part	GO:0046912//transferase activity, transferring acyl groups, acyl groups converted into alkyl on transfer	GO:0006084//acetyl-CoA metabolic process;GO:0006694//steroid biosynthetic process;GO:0006720//isoprenoid metabolic process
Unigene0052615	0.297	0	0	0.997	0.097	0	0	0.06	1.667	0	0	6	0.667	0	0	0.333	HMGS	PREDICTED: hydroxymethylglutaryl-CoA synthase-like [Gossypium hirsutum]	Metabolism;Metabolism;Metabolism;Metabolism;Metabolism;Metabolism	Global and overview maps;Global and overview maps;Amino acid metabolism;Metabolism of terpenoids and polyketides;Carbohydrate metabolism;Lipid metabolism	ko01100//Metabolic pathways;ko01110//Biosynthesis of secondary metabolites;ko00280//Valine, leucine and isoleucine degradation;ko00900//Terpenoid backbone biosynthesis;ko00650//Butanoate metabolism;ko00072//Synthesis and degradation of ketone bodies	K01641;K01641;K01641;K01641;K01641;K01641	-	GO:0016740//transferase activity	GO:0008202//steroid metabolic process;GO:0008610//lipid biosynthetic process;GO:0044237//cellular metabolic process
Unigene0052614	0.183	0	0	0.617	0.1	0	0	0	1	0	0	3.667	0.667	0	0	0	HMGS	hydroxymethylglutaryl-CoA synthase-like [Abrus precatorius]	Metabolism;Metabolism;Metabolism;Metabolism;Metabolism;Metabolism	Global and overview maps;Global and overview maps;Amino acid metabolism;Metabolism of terpenoids and polyketides;Carbohydrate metabolism;Lipid metabolism	ko01100//Metabolic pathways;ko01110//Biosynthesis of secondary metabolites;ko00280//Valine, leucine and isoleucine degradation;ko00900//Terpenoid backbone biosynthesis;ko00650//Butanoate metabolism;ko00072//Synthesis and degradation of ketone bodies	K01641;K01641;K01641;K01641;K01641;K01641	-	-	-
Unigene0038801	2.07	20.403	18.01	1.83	6.607	10.32	4.11	16.837	39.333	345.667	286	29	130.667	228.667	79	313	HMGS	PREDICTED: hydroxymethylglutaryl-CoA synthase-like [Capsicum annuum]	Metabolism;Metabolism;Metabolism;Metabolism;Metabolism;Metabolism	Global and overview maps;Global and overview maps;Amino acid metabolism;Metabolism of terpenoids and polyketides;Carbohydrate metabolism;Lipid metabolism	ko01100//Metabolic pathways;ko01110//Biosynthesis of secondary metabolites;ko00280//Valine, leucine and isoleucine degradation;ko00900//Terpenoid backbone biosynthesis;ko00650//Butanoate metabolism;ko00072//Synthesis and degradation of ketone bodies	K01641;K01641;K01641;K01641;K01641;K01641	-	-	GO:0008610//lipid biosynthetic process
Unigene0062907	5.7	3.957	2.23	1.997	3.817	1.07	2.653	2.75	117.333	79	43	43	91.667	28	59	60.667	ICME	prenylcysteine alpha-carboxyl methylesterase [Salvia splendens]	Metabolism;Metabolism;Metabolism	Global and overview maps;Global and overview maps;Metabolism of terpenoids and polyketides	ko01100//Metabolic pathways;ko01110//Biosynthesis of secondary metabolites;ko00900//Terpenoid backbone biosynthesis	K15889;K15889;K15889	-	-	-
Unigene0003881	0.203	49.507	0.283	0.187	0.29	0.493	0.503	0.267	4	942	5.333	3.667	7	12.333	12	5.667	ICMEL1	Arylacetamide deacetylase [Handroanthus impetiginosus]	Metabolism;Metabolism;Metabolism	Global and overview maps;Global and overview maps;Metabolism of terpenoids and polyketides	ko01100//Metabolic pathways;ko01110//Biosynthesis of secondary metabolites;ko00900//Terpenoid backbone biosynthesis	K15889;K15889;K15889	-	-	-
Unigene0069501	0.593	8.523	2.863	0.127	1.38	2.477	0.777	1.97	7.667	96.333	30.667	1.333	18.333	37	10.333	24.667	ICMTA	protein-S-isoprenylcysteine O-methyltransferase [Capsaspora owczarzaki ATCC 30864]	Metabolism;Metabolism	Global and overview maps;Metabolism of terpenoids and polyketides	ko01110//Biosynthesis of secondary metabolites;ko00900//Terpenoid backbone biosynthesis	K00587;K00587	GO:0016020//membrane;GO:0043231//intracellular membrane-bounded organelle	GO:0003880//protein C-terminal carboxyl O-methyltransferase activity	GO:0006479//protein methylation;GO:0090567//reproductive shoot system development
Unigene0059316	16.447	5.717	10.79	13.247	9.277	4.8	12.83	11.163	441.333	146.333	264	372	286.333	159.667	361.667	312.667	ICMTA	protein-S-isoprenylcysteine O-methyltransferase [Salvia splendens]	Metabolism;Metabolism	Global and overview maps;Metabolism of terpenoids and polyketides	ko01110//Biosynthesis of secondary metabolites;ko00900//Terpenoid backbone biosynthesis	K00587;K00587	GO:0031090//organelle membrane;GO:0031224//intrinsic component of membrane;GO:0043231//intracellular membrane-bounded organelle	GO:0003880//protein C-terminal carboxyl O-methyltransferase activity	GO:0006479//protein methylation;GO:0009787//regulation of abscisic acid-activated signaling pathway;GO:0090567//reproductive shoot system development
Unigene0052610	2.173	0.41	0.203	0.953	1.557	0.527	0.083	1.12	35.667	6.333	3	15.333	29.333	10.667	1.333	19	ICMTA	protein-s isoprenylcysteine O-methyltransferase [Striga asiatica]	Metabolism;Metabolism	Global and overview maps;Metabolism of terpenoids and polyketides	ko01110//Biosynthesis of secondary metabolites;ko00900//Terpenoid backbone biosynthesis	K00587;K00587	GO:0031224//intrinsic component of membrane;GO:0043231//intracellular membrane-bounded organelle	GO:0003880//protein C-terminal carboxyl O-methyltransferase activity	GO:0006479//protein methylation;GO:0009787//regulation of abscisic acid-activated signaling pathway;GO:0090567//reproductive shoot system development
Unigene0067472	40.607	43.047	18.837	29.93	17.937	7.407	14.16	16.99	1207.67	1216.67	512	964.333	612	273.667	444	530	IPI2	isopentenyl pyrophosphate isomerase [Salvia miltiorrhiza]	Metabolism;Metabolism;Metabolism	Global and overview maps;Global and overview maps;Metabolism of terpenoids and polyketides	ko01100//Metabolic pathways;ko01110//Biosynthesis of secondary metabolites;ko00900//Terpenoid backbone biosynthesis	K01823;K01823;K01823	GO:0009536//plastid	GO:0016863//intramolecular oxidoreductase activity, transposing C=C bonds;GO:0043169//cation binding	GO:0006090//pyruvate metabolic process;GO:0006720//isoprenoid metabolic process;GO:0006779//porphyrin-containing compound biosynthetic process;GO:0008654//phospholipid biosynthetic process;GO:0010038//response to metal ion;GO:0045333//cellular respiration;GO:0090567//reproductive shoot system development
Unigene0049401	0.637	0.23	0.523	0.46	0.09	0.207	0.067	0.457	5.333	2	4.333	4.333	1	2.333	0.667	4.333	IPI2	isopentenyl diphosphate isomerase [Salvia miltiorrhiza]	Metabolism;Metabolism;Metabolism	Global and overview maps;Global and overview maps;Metabolism of terpenoids and polyketides	ko01100//Metabolic pathways;ko01110//Biosynthesis of secondary metabolites;ko00900//Terpenoid backbone biosynthesis	K01823;K01823;K01823	GO:0009536//plastid	GO:0016863//intramolecular oxidoreductase activity, transposing C=C bonds;GO:0043169//cation binding	GO:0006090//pyruvate metabolic process;GO:0006720//isoprenoid metabolic process;GO:0006779//porphyrin-containing compound biosynthetic process;GO:0008654//phospholipid biosynthetic process;GO:0010038//response to metal ion;GO:0045333//cellular respiration;GO:0090567//reproductive shoot system development
Unigene0058617	9.023	5.373	5.747	7.687	6.473	4.54	2.46	5.333	310.333	169.667	178	276.667	245.333	186	86.333	184.333	IPK	isopentenyl phosphate kinase [Scutellaria barbata]	Metabolism;Metabolism;Metabolism	Global and overview maps;Global and overview maps;Metabolism of terpenoids and polyketides	ko01100//Metabolic pathways;ko01110//Biosynthesis of secondary metabolites;ko00900//Terpenoid backbone biosynthesis	K06981;K06981;K06981	-	GO:0016772//transferase activity, transferring phosphorus-containing groups;GO:0032550//purine ribonucleoside binding	GO:0006520//cellular amino acid metabolic process;GO:0006796//phosphate-containing compound metabolic process
Unigene0067202	1.207	9.82	5.583	0.433	2.477	3.623	1.887	3.613	16	113.333	60.667	4.667	33.333	55	24.667	46	IPP2	isopentenyl diphosphate isomerase [Cestrum nocturnum]	Metabolism;Metabolism;Metabolism	Global and overview maps;Global and overview maps;Metabolism of terpenoids and polyketides	ko01100//Metabolic pathways;ko01110//Biosynthesis of secondary metabolites;ko00900//Terpenoid backbone biosynthesis	K01823;K01823;K01823	GO:0009536//plastid	GO:0016863//intramolecular oxidoreductase activity, transposing C=C bonds	GO:0006090//pyruvate metabolic process;GO:0006720//isoprenoid metabolic process;GO:0006779//porphyrin-containing compound biosynthetic process;GO:0010038//response to metal ion;GO:0044711//single-organism biosynthetic process;GO:0045333//cellular respiration;GO:0090567//reproductive shoot system development
Unigene0057742	7.313	2.06	5.65	5.267	3.813	2.437	3.947	3.073	155	41	109	116.333	91.333	63	86.667	67	ISPD	2-C-methyl-D-erythritol 4-phosphatecytidylyltransferase [Striga asiatica]	-	-	-	-	GO:0043231//intracellular membrane-bounded organelle	-	-
Unigene0046276	3.83	1.47	4.07	3.73	3.71	2.047	3.317	2.757	220.667	80.333	212.333	224	240	144	197.333	163.333	ISPD	2-C-methyl-D-erythritol 4-phosphate cytidylyltransferase [Salvia miltiorrhiza]	Metabolism;Metabolism;Metabolism	Global and overview maps;Global and overview maps;Metabolism of terpenoids and polyketides	ko01100//Metabolic pathways;ko01110//Biosynthesis of secondary metabolites;ko00900//Terpenoid backbone biosynthesis	K00991;K00991;K00991	GO:0009532//plastid stroma	GO:0070567//cytidylyltransferase activity	GO:0006090//pyruvate metabolic process;GO:0006544//glycine metabolic process;GO:0006633//fatty acid biosynthetic process;GO:0006732//coenzyme metabolic process;GO:0006753//nucleoside phosphate metabolic process;GO:0006779//porphyrin-containing compound biosynthetic process;GO:0006790//sulfur compound metabolic process;GO:0009314//response to radiation;GO:0009694//jasmonic acid metabolic process;G…
Unigene0046276	3.83	1.47	4.07	3.73	3.71	2.047	3.317	2.757	220.667	80.333	212.333	224	240	144	197.333	163.333	ISPD	2-C-methyl-D-erythritol 4-phosphate cytidylyltransferase [Salvia miltiorrhiza]	Metabolism;Metabolism;Metabolism	Global and overview maps;Global and overview maps;Metabolism of terpenoids and polyketides	ko01100//Metabolic pathways;ko01110//Biosynthesis of secondary metabolites;ko00900//Terpenoid backbone biosynthesis	K00991;K00991;K00991	GO:0009532//plastid stroma	GO:0070567//cytidylyltransferase activity	GO:0006090//pyruvate metabolic process;GO:0006544//glycine metabolic process;GO:0006633//fatty acid biosynthetic process;GO:0006732//coenzyme metabolic process;GO:0006753//nucleoside phosphate metabolic process;GO:0006779//porphyrin-containing compound biosynthetic process;GO:0006790//sulfur compound metabolic process;GO:0009314//response to radiation;GO:0009694//jasmonic acid metabolic process;G…
Unigene0009975	34.953	3.92	41.757	30.923	26.207	10.577	32.79	28.53	912	98.667	1010.33	827	783.667	341	889.333	774.667	ISPD	2-C-methyl-D-erythritol 4-phosphatecytidylyltransferase [Striga asiatica]	-	-	-	-	-	-	-
Unigene0019946	56.787	21.227	26.133	25.573	52.21	17.04	36.4	46.673	2700	968.667	1145.67	1296.67	2890	1012.67	1822.67	2340.33	ISPE	4-diphosphocytidyl-2-C-methyl-D-erythritol kinase [Salvia miltiorrhiza]	-	-	-	-	GO:0009532//plastid stroma	GO:0016301//kinase activity;GO:0032550//purine ribonucleoside binding	GO:0006090//pyruvate metabolic process;GO:0006721//terpenoid metabolic process;GO:0006779//porphyrin-containing compound biosynthetic process;GO:0006796//phosphate-containing compound metabolic process;GO:0009639//response to red or far red light;GO:0009642//response to light intensity;GO:0034285//response to disaccharide;GO:0043269//regulation of ion transport
Unigene0070182	36.043	17.91	19.283	19.803	35.037	13.303	34.58	39.997	681.667	326.667	336.333	405.333	771.333	314.667	691.333	798.667	ISPF	2-C-methyl-D-erythritol 2,4-cyclodiphosphate synthase [Salvia miltiorrhiza]	Metabolism;Metabolism;Metabolism	Global and overview maps;Global and overview maps;Metabolism of terpenoids and polyketides	ko01100//Metabolic pathways;ko01110//Biosynthesis of secondary metabolites;ko00900//Terpenoid backbone biosynthesis	K01770;K01770;K01770	GO:0009532//plastid stroma	GO:0016849//phosphorus-oxygen lyase activity;GO:0043169//cation binding	GO:0000097//sulfur amino acid biosynthetic process;GO:0006090//pyruvate metabolic process;GO:0006355//regulation of transcription, DNA-templated;GO:0006633//fatty acid biosynthetic process;GO:0006739//NADP metabolic process;GO:0006743//ubiquinone metabolic process;GO:0006779//porphyrin-containing compound biosynthetic process;GO:0009639//response to red or far red light;GO:0009642//response to li…
Unigene0011615	180.343	46.503	91.41	75.2	201.037	66.457	232.59	293.007	6875.67	1721.33	3239.33	3045	8970.67	3191.33	9347.33	11872	ISPG	plastid 4-hydroxy-3-methylbut-2-enyl diphosphate synthase [Salvia miltiorrhiza]	Metabolism;Metabolism;Metabolism	Global and overview maps;Global and overview maps;Metabolism of terpenoids and polyketides	ko01100//Metabolic pathways;ko01110//Biosynthesis of secondary metabolites;ko00900//Terpenoid backbone biosynthesis	K03526;K03526;K03526	GO:0009526//plastid envelope;GO:0009532//plastid stroma	GO:0046914//transition metal ion binding;GO:0051536//iron-sulfur cluster binding;GO:0052592//oxidoreductase activity, acting on CH or CH2 groups, with an iron-sulfur protein as acceptor	GO:0005982//starch metabolic process;GO:0006090//pyruvate metabolic process;GO:0006091//generation of precursor metabolites and energy;GO:0006355//regulation of transcription, DNA-templated;GO:0006544//glycine metabolic process;GO:0006605//protein targeting;GO:0006633//fatty acid biosynthetic process;GO:0006739//NADP metabolic process;GO:0006779//porphyrin-containing compound biosynthetic process…
Unigene0020096	1.527	0.043	0.137	0.073	0.273	0.033	0.217	0.29	11.667	0.333	1	0.667	2.667	0.333	1.667	2.333	ISPH	1-hydroxy-2-methyl-2-(E)-butenyl-4-diphosphate reductase [Mentha x piperita]	Metabolism;Metabolism;Metabolism	Global and overview maps;Global and overview maps;Metabolism of terpenoids and polyketides	ko01100//Metabolic pathways;ko01110//Biosynthesis of secondary metabolites;ko00900//Terpenoid backbone biosynthesis	K03527;K03527;K03527	GO:0009532//plastid stroma	GO:0016726//oxidoreductase activity, acting on CH or CH2 groups, NAD or NADP as acceptor;GO:0043169//cation binding;GO:0051536//iron-sulfur cluster binding;GO:0052592//oxidoreductase activity, acting on CH or CH2 groups, with an iron-sulfur protein as acceptor	GO:0006090//pyruvate metabolic process;GO:0006720//isoprenoid metabolic process;GO:0008654//phospholipid biosynthetic process
Unigene0015854	2.033	0.25	0.847	0.653	1.493	0.7	1.413	0.973	8.333	1	3.333	2.667	7.333	3.667	6.333	4.333	ISPH	LYTB-like protein, partial [Malus domestica]	Metabolism;Metabolism;Metabolism	Global and overview maps;Global and overview maps;Metabolism of terpenoids and polyketides	ko01100//Metabolic pathways;ko01110//Biosynthesis of secondary metabolites;ko00900//Terpenoid backbone biosynthesis	K03527;K03527;K03527	-	-	-
Unigene0001740	13.873	4.277	10.327	6.267	21.89	5.09	13.493	15.737	412.667	119.333	272.667	195.333	739	185	416.333	483	ISPH	4-hydroxy-3-methylbut-2-enyl diphosphate reductase 2 [Salvia miltiorrhiza]	Metabolism;Metabolism;Metabolism	Global and overview maps;Global and overview maps;Metabolism of terpenoids and polyketides	ko01100//Metabolic pathways;ko01110//Biosynthesis of secondary metabolites;ko00900//Terpenoid backbone biosynthesis	K03527;K03527;K03527	GO:0009532//plastid stroma	GO:0016726//oxidoreductase activity, acting on CH or CH2 groups, NAD or NADP as acceptor;GO:0043169//cation binding;GO:0051536//iron-sulfur cluster binding;GO:0052592//oxidoreductase activity, acting on CH or CH2 groups, with an iron-sulfur protein as acceptor	GO:0006090//pyruvate metabolic process;GO:0006720//isoprenoid metabolic process;GO:0008654//phospholipid biosynthetic process;GO:0009636//response to toxic substance
Unigene0026690	0	0.777	0.15	0	0.063	0.16	0	0.193	0	3.667	0.667	0	0.333	1	0	1	KAO	PREDICTED: ent-kaurenoic acid oxidase 2-like, partial [Lupinus angustifolius]	Metabolism;Metabolism;Metabolism	Global and overview maps;Global and overview maps;Metabolism of terpenoids and polyketides	ko01100//Metabolic pathways;ko01110//Biosynthesis of secondary metabolites;ko00904//Diterpenoid biosynthesis	K04123;K04123;K04123	-	-	-
Unigene0053075	1.057	0.34	3.62	9.733	5.493	2.357	11	17.813	30	9	90	273.333	170.667	81.333	319	518.333	KAO1	gibberellin biosynthesis-related protein KAO2 [Salvia miltiorrhiza]	Metabolism;Metabolism;Metabolism	Global and overview maps;Global and overview maps;Metabolism of terpenoids and polyketides	ko01100//Metabolic pathways;ko01110//Biosynthesis of secondary metabolites;ko00904//Diterpenoid biosynthesis	K04123;K04123;K04123	GO:0043231//intracellular membrane-bounded organelle;GO:0044425//membrane part	GO:0016709//oxidoreductase activity, acting on paired donors, with incorporation or reduction of molecular oxygen, NAD(P)H as one donor, and incorporation of one atom of oxygen;GO:0046906//tetrapyrrole binding;GO:0046914//transition metal ion binding	GO:0009685//gibberellin metabolic process
Unigene0009871	5.06	0.453	5.95	3.663	7.34	1.65	5.563	4.257	126	11	140.333	96.333	209.667	52	147	112.667	KAO1	cytochrome P450 CYP88A52 [Salvia miltiorrhiza]	Metabolism;Metabolism;Metabolism	Global and overview maps;Global and overview maps;Metabolism of terpenoids and polyketides	ko01100//Metabolic pathways;ko01110//Biosynthesis of secondary metabolites;ko00904//Diterpenoid biosynthesis	K04123;K04123;K04123	GO:0031090//organelle membrane;GO:0031224//intrinsic component of membrane;GO:0043231//intracellular membrane-bounded organelle	GO:0016709//oxidoreductase activity, acting on paired donors, with incorporation or reduction of molecular oxygen, NAD(P)H as one donor, and incorporation of one atom of oxygen;GO:0046906//tetrapyrrole binding;GO:0046914//transition metal ion binding	GO:0009685//gibberellin metabolic process
Unigene0023798	59.727	30.88	70.423	71.487	61.047	39.05	57.287	58.993	2139.33	1019.67	2234.67	2680.67	2395.67	1681.67	2101.33	2144.33	KO	cytochrome P450 CYP701A40 [Salvia miltiorrhiza]	Metabolism;Metabolism;Metabolism	Global and overview maps;Global and overview maps;Metabolism of terpenoids and polyketides	ko01100//Metabolic pathways;ko01110//Biosynthesis of secondary metabolites;ko00904//Diterpenoid biosynthesis	K04122;K04122;K04122	GO:0009527//plastid outer membrane;GO:0031224//intrinsic component of membrane	GO:0016709//oxidoreductase activity, acting on paired donors, with incorporation or reduction of molecular oxygen, NAD(P)H as one donor, and incorporation of one atom of oxygen;GO:0046906//tetrapyrrole binding;GO:0046914//transition metal ion binding	GO:0009685//gibberellin metabolic process;GO:0010476//gibberellin mediated signaling pathway;GO:0055114//oxidation-reduction process
Unigene0066810	0.59	5.21	3.077	0.38	0.837	1.397	0.783	1.753	7	55.667	31	4	10.333	19.667	9.667	20.667	mvd	diphosphomevalonate decarboxylase [Sphaeroforma arctica JP610]	Metabolism;Metabolism;Metabolism	Global and overview maps;Global and overview maps;Metabolism of terpenoids and polyketides	ko01100//Metabolic pathways;ko01110//Biosynthesis of secondary metabolites;ko00900//Terpenoid backbone biosynthesis	K01597;K01597;K01597	GO:0044444//cytoplasmic part	GO:0016831//carboxy-lyase activity;GO:0046983//protein dimerization activity	GO:0006084//acetyl-CoA metabolic process;GO:0006694//steroid biosynthetic process;GO:0008299//isoprenoid biosynthetic process;GO:0046165//alcohol biosynthetic process
Unigene0027235	39.097	42.213	23.443	32.247	34.833	13.58	25.913	23.713	1008	1028.33	550.333	883	1017.33	433	698.333	637.333	MVD2	mevalonate diphosphate decarboxylase [Salvia miltiorrhiza]	Metabolism;Metabolism;Metabolism	Global and overview maps;Global and overview maps;Metabolism of terpenoids and polyketides	ko01100//Metabolic pathways;ko01110//Biosynthesis of secondary metabolites;ko00900//Terpenoid backbone biosynthesis	K01597;K01597;K01597	GO:0044444//cytoplasmic part	GO:0016772//transferase activity, transferring phosphorus-containing groups;GO:0016831//carboxy-lyase activity;GO:0032550//purine ribonucleoside binding;GO:0046983//protein dimerization activity	GO:0006084//acetyl-CoA metabolic process;GO:0006796//phosphate-containing compound metabolic process;GO:0016104//triterpenoid biosynthetic process;GO:0016129//phytosteroid biosynthetic process
Unigene0059508	1.027	17.783	5.727	0.41	3.033	4.837	1.717	5.957	37	582	178	12.667	116	209.667	64.333	216.667	MVK	mevalonate kinase-like [Physcomitrella patens]	Metabolism;Metabolism;Cellular Processes;Metabolism	Global and overview maps;Global and overview maps;Transport and catabolism;Metabolism of terpenoids and polyketides	ko01100//Metabolic pathways;ko01110//Biosynthesis of secondary metabolites;ko04146//Peroxisome;ko00900//Terpenoid backbone biosynthesis	K00869;K00869;K00869;K00869	GO:0044444//cytoplasmic part	GO:0016301//kinase activity	GO:0006996//organelle organization;GO:0008610//lipid biosynthetic process
Unigene0058503	9.863	13.827	9.79	9.5	10.857	5.35	8.893	6.2	270.667	353.667	241.667	276.667	330	178.667	252.667	174.667	MVK	mevalonate kinase [Salvia miltiorrhiza]	Metabolism;Metabolism;Cellular Processes;Metabolism	Global and overview maps;Global and overview maps;Transport and catabolism;Metabolism of terpenoids and polyketides	ko01100//Metabolic pathways;ko01110//Biosynthesis of secondary metabolites;ko04146//Peroxisome;ko00900//Terpenoid backbone biosynthesis	K00869;K00869;K00869;K00869	GO:0044444//cytoplasmic part	GO:0016301//kinase activity;GO:0032550//purine ribonucleoside binding	GO:0006084//acetyl-CoA metabolic process;GO:0006694//steroid biosynthetic process;GO:0006720//isoprenoid metabolic process;GO:0006796//phosphate-containing compound metabolic process;GO:0006997//nucleus organization;GO:0048285//organelle fission
Unigene0047294	0	0	0	0.55	0	0	0	0	0	0	0	2	0	0	0	0	MVK	mevalonate kinase [Spinacia oleracea]	Metabolism;Metabolism;Cellular Processes;Metabolism	Global and overview maps;Global and overview maps;Transport and catabolism;Metabolism of terpenoids and polyketides	ko01100//Metabolic pathways;ko01110//Biosynthesis of secondary metabolites;ko04146//Peroxisome;ko00900//Terpenoid backbone biosynthesis	K00869;K00869;K00869;K00869	GO:0044444//cytoplasmic part	GO:0016301//kinase activity	GO:0006996//organelle organization;GO:0008610//lipid biosynthetic process
Unigene0057349	13.477	6.953	5.427	7.827	10.397	3.723	7.933	8.223	314.333	154	115.333	193.333	276	107.667	195.333	200.333	PCME	prenylcysteine alpha-carboxyl methylesterase [Salvia splendens]	Metabolism;Metabolism;Metabolism	Global and overview maps;Global and overview maps;Metabolism of terpenoids and polyketides	ko01100//Metabolic pathways;ko01110//Biosynthesis of secondary metabolites;ko00900//Terpenoid backbone biosynthesis	K15889;K15889;K15889	-	-	-
Unigene0007532	0.9	11.703	6.963	0.433	2.95	4.58	1.507	5.113	15	173.333	97	6	51	89	25.667	83.333	Pdss1	decaprenyl-diphosphate synthase subunit 1-like [Rhodamnia argentea]	Metabolism;Metabolism;Metabolism	Global and overview maps;Global and overview maps;Metabolism of terpenoids and polyketides	ko01100//Metabolic pathways;ko01110//Biosynthesis of secondary metabolites;ko00900//Terpenoid backbone biosynthesis	K14066;K14066;K14066	GO:0009536//plastid	GO:0004659//prenyltransferase activity	GO:0003006//developmental process involved in reproduction;GO:0006743//ubiquinone metabolic process
Unigene0044527	7.96	9.35	5.867	5.76	6.737	2.89	5.723	4.773	401.667	440	268.667	308.667	383.667	178	300.667	247.667	PMK	5-phosphomevalonate kinase [Salvia miltiorrhiza]	Metabolism;Metabolism;Metabolism	Global and overview maps;Global and overview maps;Metabolism of terpenoids and polyketides	ko01100//Metabolic pathways;ko01110//Biosynthesis of secondary metabolites;ko00900//Terpenoid backbone biosynthesis	K00938;K00938;K00938	GO:0044424//intracellular part	GO:0016301//kinase activity;GO:0032550//purine ribonucleoside binding	GO:0006694//steroid biosynthetic process;GO:0006796//phosphate-containing compound metabolic process;GO:0016104//triterpenoid biosynthetic process
Unigene0043730	0.387	4.79	4.4	0.2	0.673	1.717	0.873	1.673	4	42.333	36.667	1.667	7	20	8.667	16.333	Rce1	CAAX prenyl protease 2-like [Trebouxia sp. A1-2]	Metabolism;Metabolism	Global and overview maps;Metabolism of terpenoids and polyketides	ko01110//Biosynthesis of secondary metabolites;ko00900//Terpenoid backbone biosynthesis	K08658;K08658	-	-	-
Unigene0007330	6.37	0.147	1.53	3.81	8.667	1.75	0.153	10.34	182	4	42.333	119.333	285.333	62.667	4.667	311.333	SCS	sclareol synthase, partial [Salvia sclarea]	Metabolism;Metabolism;Metabolism	Global and overview maps;Global and overview maps;Metabolism of terpenoids and polyketides	ko01100//Metabolic pathways;ko01110//Biosynthesis of secondary metabolites;ko00904//Diterpenoid biosynthesis	K04121;K04121;K04121	GO:0043231//intracellular membrane-bounded organelle;GO:0044444//cytoplasmic part	GO:0016838//carbon-oxygen lyase activity, acting on phosphates	GO:0043692//monoterpene metabolic process
Unigene0048357	3.137	2.237	2.997	2.08	3.53	1.6	2.84	2.443	74.333	50	63.667	50.333	95	46.667	70.333	60	SPS2	all-trans-nonaprenyl-diphosphate synthase [Salvia splendens]	Metabolism;Metabolism	Global and overview maps;Metabolism of terpenoids and polyketides	ko01110//Biosynthesis of secondary metabolites;ko00900//Terpenoid backbone biosynthesis	K05356;K05356	GO:0009536//plastid	GO:0016765//transferase activity, transferring alkyl or aryl (other than methyl) groups;GO:0043169//cation binding	GO:0006720//isoprenoid metabolic process;GO:0006743//ubiquinone metabolic process;GO:1901663//quinone biosynthetic process
Unigene0006941	7.127	2.963	5.77	6.87	5.89	2.683	4.907	4.84	213.667	83.333	156.667	216.667	198.333	98	153	149	GGPPS	geranyl diphosphate synthase [Salvia miltiorrhiza]	Metabolism;Metabolism;Metabolism	Global and overview maps;Global and overview maps;Metabolism of terpenoids and polyketides	ko01100//Metabolic pathways;ko01110//Biosynthesis of secondary metabolites;ko00900//Terpenoid backbone biosynthesis	K14066;K14066;K14066	GO:0009536//plastid	GO:0004659//prenyltransferase activity	GO:0003006//developmental process involved in reproduction;GO:0006743//ubiquinone metabolic process;GO:0044767//single-organism developmental process
Unigene0031265	28.113	14.62	11.647	13.36	48.337	7.523	38.617	68.04	721	361	273	361	1431.33	243	1038.67	1853	TPS2	kaurene synthase [Salvia miltiorrhiza]	Metabolism;Metabolism;Metabolism	Global and overview maps;Global and overview maps;Metabolism of terpenoids and polyketides	ko01100//Metabolic pathways;ko01110//Biosynthesis of secondary metabolites;ko00904//Diterpenoid biosynthesis	K04121;K04121;K04121	GO:0043231//intracellular membrane-bounded organelle	GO:0016838//carbon-oxygen lyase activity, acting on phosphates	GO:0043692//monoterpene metabolic process
Unigene0037093	7.403	3.317	4.587	6.493	7.907	4.333	4.937	7.117	286.333	117.333	159	258.667	338.667	200.333	194	277.333	TPS4	kaurene synthase 2, partial [Salvia miltiorrhiza]	Metabolism;Metabolism;Metabolism	Global and overview maps;Global and overview maps;Metabolism of terpenoids and polyketides	ko01100//Metabolic pathways;ko01110//Biosynthesis of secondary metabolites;ko00904//Diterpenoid biosynthesis	K04121;K04121;K04121	GO:0009532//plastid stroma	GO:0010333//terpene synthase activity	GO:0009685//gibberellin metabolic process;GO:0010476//gibberellin mediated signaling pathway;GO:0044085//cellular component biogenesis
Unigene0030774	0	0.177	0.277	0.093	0.15	0.2	0	0.393	0	0.667	1	0.333	0.667	1	0	1.667	TsSte24p	Peptidase M48 [Macleaya cordata]	Metabolism;Metabolism	Global and overview maps;Metabolism of terpenoids and polyketides	ko01110//Biosynthesis of secondary metabolites;ko00900//Terpenoid backbone biosynthesis	K06013;K06013	GO:0043231//intracellular membrane-bounded organelle;GO:0044425//membrane part	GO:0004175//endopeptidase activity	GO:0006508//proteolysis;GO:0016482//cytoplasmic transport;GO:0044267//cellular protein metabolic process;GO:0051604//protein maturation
Unigene0069472	1.347	13.223	4.07	0.253	3.2	5.783	1.087	6.783	29.333	252	73.667	4.667	71.333	146	23.333	143.667	ZMPSTE24	CAAX prenyl protease 1 [Capsaspora owczarzaki ATCC 30864]	Metabolism;Metabolism	Global and overview maps;Metabolism of terpenoids and polyketides	ko01110//Biosynthesis of secondary metabolites;ko00900//Terpenoid backbone biosynthesis	K06013;K06013	GO:0043231//intracellular membrane-bounded organelle	GO:0004175//endopeptidase activity	GO:0016482//cytoplasmic transport;GO:0044267//cellular protein metabolic process;GO:0051604//protein maturation
Unigene0046010	0.06	0.93	0.303	0	0	0.707	0.067	0.063	0.333	4.333	1.333	0	0	4.333	0.333	0.333	Zmpste24	CAAX prenyl protease 1 [Capsaspora owczarzaki ATCC 30864]	Metabolism;Metabolism	Global and overview maps;Metabolism of terpenoids and polyketides	ko01110//Biosynthesis of secondary metabolites;ko00900//Terpenoid backbone biosynthesis	K06013;K06013	GO:0043231//intracellular membrane-bounded organelle	GO:0070011//peptidase activity, acting on L-amino acid peptides	GO:0010467//gene expression;GO:0044267//cellular protein metabolic process
