# Supplementary material for: Comparative transcriptome analyses of different Salvia miltiorrhiza varieties during the accumulation of tanshinones
Source: PeerJ. 2021 Oct 20;9:e12300. doi: 10.7717/peerj.12300 (PMC8541307; doi:10.7717/peerj.12300)
Supplement: Supplemental Information 15 [file peerj-09-12300-s015.xlsx]

## Sheet: DEGs expression
# Expression of 277 tanshinone accumulation-related DEGs
ID	CTN	TNIIA	TNI	SC2	YN2	SX2	HN2	SC1	YN1	SX1	HN1	SC2_count	YN2_count	SX2_count	HN2_count	SC1_count	YN1_count	SX1_count	HN1_count	Symbol	Description	KEGG_A_class	KEGG_B_class	Pathway	K_ID	GO.Component	GO.Function	GO.Process
Unigene0000363	0.952885	0.850556	0.817559	12.32	85.21	11.213	18.66	7.327	6.743	11.317	7.937	239.333	1513.33	194	380.667	162.333	157	228	156	UGT74E2	N-hydroxythioamide S-beta-glucosyltransferase [Salvia splendens]	-	-	-	-	-	GO:0016757//transferase activity, transferring glycosyl groups	-
Unigene0000444	0.946356	0.828812	0.780641	6.49	63.167	9	9.653	4.947	4.8	10.15	7.747	128.667	1198.67	164.667	207.667	117.333	119.667	219.667	162.667	XTH30	probable xyloglucan endotransglucosylase/hydrolase protein 30 [Sesamum indicum]	-	-	-	-	GO:0005576//extracellular region;GO:0030312//external encapsulating structure	GO:0016758//transferase activity, transferring hexosyl groups;GO:0016787//hydrolase activity	GO:0044042//glucan metabolic process;GO:0045229//external encapsulating structure organization
Unigene0000487	0.820019	0.764812	0.767177	6.967	10.263	3.827	3.38	2.65	1.563	5.863	3.887	50.667	68.667	24.333	25.333	21.333	13.667	45	28.667	--	nodulin 22 [Cucumis melo var. makuwa] [Cucumis melo]	-	-	-	-	GO:0031090//organelle membrane	-	-
Unigene0000703	0.934143	0.815043	0.765016	0	3.173	0	0	0	0	0	0	0	25	0	0	0	0	0	0	--	-	-	-	-	-	-	-	-
Unigene0001783	0.975683	0.888216	0.839479	1	12.627	2.487	1.3	0.597	0.46	0.423	0.437	83	951.667	188.333	116.333	54	45.667	36	36.333	--	copia protein (gag-int-pol protein) [Trifolium pratense]	-	-	-	-	-	-	-
Unigene0002457	0.907963	0.886749	0.859061	1.963	3.53	1.753	0.343	0.507	0.417	1.27	0.547	26	43	20.667	4.667	7.333	6.667	17	7.333	PHL8	myb family transcription factor PHL8 [Sesamum indicum]	-	-	-	-	GO:0043231//intracellular membrane-bounded organelle	GO:0001071//nucleic acid binding transcription factor activity	GO:0000097//sulfur amino acid biosynthetic process;GO:0008380//RNA splicing;GO:0009409//response to cold;GO:0009566//fertilization;GO:0009648//photoperiodism;GO:0009755//hormone-mediated signaling pathway;GO:0010468//regulation of gene expression
Unigene0002503	0.914746	0.846636	0.813196	4.37	17.36	4.81	1.017	5.58	0.18	0.64	0.297	85	319	83.667	20.667	122.333	4.333	13.667	6	NUDT17	nudix hydrolase 17, mitochondrial [Sesamum indicum]	-	-	-	-	GO:0043231//intracellular membrane-bounded organelle	GO:0052841//inositol bisdiphosphate tetrakisphosphate diphosphatase activity;GO:0052842//inositol diphosphate pentakisphosphate diphosphatase activity	-
Unigene0002514	0.801492	0.724362	0.718722	6.623	14.79	3.593	2.937	8.173	1.14	2.693	2.257	311	632.333	145.333	138.333	418.333	64	129	106.667	ACA13	calcium-transporting ATPase 12, plasma membrane-type [Sesamum indicum]	-	-	-	-	GO:0031224//intrinsic component of membrane	GO:0005515//protein binding;GO:0019829//cation-transporting ATPase activity;GO:0032550//purine ribonucleoside binding;GO:0043169//cation binding	GO:0002252//immune effector process;GO:0006816//calcium ion transport;GO:0007165//signal transduction;GO:0010243//response to organonitrogen compound;GO:0051707//response to other organism;GO:0072503//cellular divalent inorganic cation homeostasis
Unigene0002545	0.762905	0.812874	0.822199	266.077	358.68	275.613	160.96	238.64	54.9	102.74	114.077	3903	5051.67	3721.33	2564.33	4140.33	1012.33	1667	1774	ERF5	EREBP-like factor [Salvia splendens]	-	-	-	-	-	GO:0003677//DNA binding	GO:0006355//regulation of transcription, DNA-templated;GO:0009605//response to external stimulus;GO:0044763//single-organism cellular process
Unigene0002635	0.863386	0.847252	0.879604	18.743	43.783	11.22	26.777	12.453	3.43	4.89	7.613	813.667	1777.33	443.667	1264.33	606.667	182.333	222.333	341.333	At1g53430	probable LRR receptor-like serine/threonine-protein kinase At1g53440 [Sesamum indicum]	-	-	-	-	GO:0031224//intrinsic component of membrane	GO:0004702//receptor signaling protein serine/threonine kinase activity;GO:0016628//oxidoreductase activity, acting on the CH-CH group of donors, NAD or NADP as acceptor;GO:0032550//purine ribonucleoside binding	GO:0032147//activation of protein kinase activity;GO:0044710//single-organism metabolic process
Unigene0002677	0.757299	0.760285	0.726634	18.363	40.727	30.093	5.927	26.087	1.277	4.087	6.093	457.667	975.667	681	164.667	743.667	40	113.667	161	WRKY24	WRKY protein [Salvia miltiorrhiza]	Organismal Systems;Environmental Information Processing	Environmental adaptation;Signal transduction	ko04626//Plant-pathogen interaction;ko04016//MAPK signaling pathway - plant	K13424;K13424	-	-	-
Unigene0002979	0.943903	0.828493	0.775129	0.693	45.153	2.893	0.54	0.697	1.347	1.323	0.333	16.333	1012.33	61.667	14	19.333	39.667	35	8.333	UGT85A24	PREDICTED: 7-deoxyloganetin glucosyltransferase-like [Erythranthe guttata]	-	-	-	-	-	GO:0035251//UDP-glucosyltransferase activity	-
Unigene0003379	0.753885	0.863017	0.847429	1.27	2.957	3.68	1.55	0	0	0	0	10.667	27.667	33	13.667	0	0	0	0	Act5C	actin [Capsaspora owczarzaki ATCC 30864]	-	-	-	-	GO:0005911//cell-cell junction;GO:0009526//plastid envelope;GO:0009532//plastid stroma;GO:0016020//membrane;GO:0030312//external encapsulating structure;GO:0043232//intracellular non-membrane-bounded organelle	GO:0032550//purine ribonucleoside binding	GO:0006006//glucose metabolic process;GO:0007010//cytoskeleton organization;GO:0048588//developmental cell growth;GO:0051603//proteolysis involved in cellular protein catabolic process
Unigene0003500	0.911492	0.845299	0.774373	4.29	25.257	11.167	2.38	6.9	6.963	1.15	2.733	265.667	1439.33	633.333	149.667	475	521.667	74	172.667	--	-	-	-	-	-	-	-	-
Unigene0003814	0.934922	0.85006	0.830698	12.383	33.867	6.693	8.89	8.413	4.897	6.69	7.177	617	1525.67	293	462	464.667	289	352.333	358	RFS5	Galactinol--sucrose galactosyltransferase [Handroanthus impetiginosus]	Metabolism;Metabolism	Global and overview maps;Carbohydrate metabolism	ko01100//Metabolic pathways;ko00052//Galactose metabolism	K06617;K06617	GO:0009536//plastid;GO:0016020//membrane	GO:0004672//protein kinase activity;GO:0008378//galactosyltransferase activity;GO:0032550//purine ribonucleoside binding	GO:0001101//response to acid chemical;GO:0005985//sucrose metabolic process;GO:0006464//cellular protein modification process;GO:0006950//response to stress;GO:0009312//oligosaccharide biosynthetic process;GO:0019318//hexose metabolic process;GO:0019406//hexitol biosynthetic process;GO:0050794//regulation of cellular process
Unigene0003824	0.799465	0.772228	0.76126	86.163	161.583	68.527	51.603	98.983	27.097	17.877	50.07	1088.67	1927.67	781.333	688.667	1412.67	422	241.667	658.667	CML46	calmodulin [Salvia splendens]	Organismal Systems;Environmental Information Processing;Environmental Information Processing	Environmental adaptation;Signal transduction;Signal transduction	ko04626//Plant-pathogen interaction;ko04016//MAPK signaling pathway - plant;ko04070//Phosphatidylinositol signaling system	K02183;K02183;K02183	GO:0016020//membrane	GO:0046872//metal ion binding	-
Unigene0003840	0.858173	0.934705	0.972623	6.61	8.983	5.657	6.587	2.343	3.59	2.947	2.907	199.667	248.333	155	207	78	130	91.667	88.667	FBL14	F-box and leucine-rich repeat protein 2/20 [Salvia splendens]	-	-	-	-	GO:0043231//intracellular membrane-bounded organelle	GO:0003824//catalytic activity	GO:0019941//modification-dependent protein catabolic process
Unigene0004270	0.775441	0.769337	0.83116	4.627	7.557	2.283	5.683	0.907	1.167	3.627	1.14	71.667	110	31.667	98	16	22.333	60.333	18.333	MYB4	MYB transcription factor 3 [Tectona grandis]	-	-	-	-	GO:0043231//intracellular membrane-bounded organelle	GO:0001071//nucleic acid binding transcription factor activity;GO:0003676//nucleic acid binding	GO:0006355//regulation of transcription, DNA-templated;GO:0030154//cell differentiation
Unigene0004285	0.593864	0.702431	0.779923	87.85	90.283	62.89	81.713	64.337	14.09	18.777	36.797	1477.67	1429.67	954.667	1437.67	1265	292.333	347	642.333	RAV1	RAV-like factor [Salvia splendens]	-	-	-	-	GO:0043231//intracellular membrane-bounded organelle	GO:0000975//regulatory region DNA binding;GO:0001071//nucleic acid binding transcription factor activity	GO:0000160//phosphorelay signal transduction system;GO:0001101//response to acid chemical;GO:0006355//regulation of transcription, DNA-templated;GO:0006605//protein targeting;GO:0006873//cellular ion homeostasis;GO:0009648//photoperiodism;GO:0009690//cytokinin metabolic process;GO:0009725//response to hormone;GO:0009891//positive regulation of biosynthetic process;GO:0009909//regulation of flower…
Unigene0004415	0.941767	0.826882	0.777419	1.117	56.767	1.74	0.61	0.56	0.337	0.687	0.113	6.667	299.333	8.667	3.667	3.667	2.333	4.333	0.667	--	-	-	-	-	-	-	-	-
Unigene0004429	0.962756	0.867732	0.833097	3.017	30.363	5.547	7.217	2.277	2.363	3.623	1.4	13.333	124	22	33.667	11.667	12.667	17	6.333	UGT74E2	N-hydroxythioamide S-beta-glucosyltransferase [Salvia splendens]	-	-	-	-	-	GO:0035251//UDP-glucosyltransferase activity	-
Unigene0004522	0.957223	0.877523	0.853242	9.597	34.49	7.353	9.2	7.223	3.653	4.61	5.59	294	982	205	298.333	248.667	136.333	149.333	176	RGLG2	E3 ubiquitin-protein ligase RGLG2 [Sesamum indicum]	-	-	-	-	GO:0016020//membrane;GO:0043231//intracellular membrane-bounded organelle	GO:0019787//ubiquitin-like protein transferase activity;GO:0046914//transition metal ion binding	GO:0006952//defense response;GO:0007165//signal transduction;GO:0009696//salicylic acid metabolic process;GO:0042445//hormone metabolic process;GO:0048585//negative regulation of response to stimulus
Unigene0004637	0.942791	0.853182	0.82572	2.32	6.04	2.273	2.83	2.05	1.427	2.12	2.4	46.333	113.667	41	60.333	45	35	45	49.667	PUP11	probable purine permease 11 [Olea europaea var. sylvestris] [Olea europaea]	-	-	-	-	GO:0009536//plastid;GO:0031224//intrinsic component of membrane	GO:0015205//nucleobase transmembrane transporter activity	GO:0015851//nucleobase transport;GO:0044763//single-organism cellular process
Unigene0004902	0.925575	0.82316	0.803357	28.237	82.443	30.38	42.303	27.377	19.707	33.607	28.32	194	524.333	187.333	305.667	205.667	163.333	239.333	198.333	--	S-adenosyl-L-methionine-dependentmethyltransferases superfamily protein [Striga asiatica]	-	-	-	-	-	-	-
Unigene0004907	0.789051	0.771572	0.75864	1.337	3.103	2.58	2.247	1.21	0.573	2.007	1.277	17.667	40	31.667	31	19.667	9.667	28.667	18	LBD41	LOB domain-containing protein 40-like [Sesamum indicum]	-	-	-	-	-	-	GO:0006950//response to stress;GO:0009685//gibberellin metabolic process;GO:0010468//regulation of gene expression;GO:0010476//gibberellin mediated signaling pathway
Unigene0004961	0.903781	0.781698	0.74144	17.313	94.313	16.52	15.13	29.42	8.78	15.887	12.71	643.667	3268	546.667	597	1222	399.667	633.333	487.333	SKIP11	F-box/kelch-repeat protein SKIP11-like isoform X1 [Sesamum indicum]	-	-	-	-	GO:0009536//plastid	-	GO:0009247//glycolipid biosynthetic process;GO:0009267//cellular response to starvation;GO:0009414//response to water deprivation;GO:0009608//response to symbiont
Unigene0005077	0.696839	0.742624	0.741517	39.733	53.563	47.43	23.6	41.28	9.667	19.453	18.533	727.333	933	783.333	463	866.333	219.333	383.667	355	SYP121	syntaxin 1B/2/3 [Salvia splendens]	Genetic Information Processing	Folding, sorting and degradation	ko04130//SNARE interactions in vesicular transport	K08486	-	-	-
Unigene0005086	0.948627	0.977523	0.963643	1.657	3.56	2.133	1.243	0.853	0.267	0.347	0.567	16.667	34.333	19.333	13.667	10	3.333	4	6	--	-	-	-	-	-	-	-	-
Unigene0005097	0.952187	0.854867	0.818702	6.723	68.16	6.923	12.247	3.193	6.303	3.37	2.74	141	1298.33	125	277	75	157.667	74.333	57.667	TAT	tyrosine aminotransferase 2 [Salvia miltiorrhiza]	Metabolism;Metabolism;Metabolism;Metabolism;Metabolism;Metabolism;Metabolism;Metabolism;Metabolism;Metabolism	Global and overview maps;Global and overview maps;Global and overview maps;Amino acid metabolism;Amino acid metabolism;Amino acid metabolism;Metabolism of cofactors and vitamins;Amino acid metabolism;Biosynthesis of other secondary metabolites;Biosynthesis of other secondary metabolites	ko01100//Metabolic pathways;ko01110//Biosynthesis of secondary metabolites;ko01230//Biosynthesis of amino acids;ko00270//Cysteine and methionine metabolism;ko00350//Tyrosine metabolism;ko00360//Phenylalanine metabolism;ko00130//Ubiquinone and other terpenoid-quinone biosynthesis;ko00400//Phenylalanine, tyrosine and tryptophan biosynthesis;ko00950//Isoquinoline alkaloid biosynthesis;ko00960//Tropa…	K00815;K00815;K00815;K00815;K00815;K00815;K00815;K00815;K00815;K00815	-	GO:0043168//anion binding;GO:0070546//L-phenylalanine aminotransferase activity;GO:0070547//L-tyrosine aminotransferase activity	GO:0019752//carboxylic acid metabolic process
Unigene0005175	0.868969	0.803315	0.797978	19.133	42.953	2.913	9.577	9.607	4.28	3.397	9.847	235	504.667	33	131.333	139	65.667	48.667	127.667	PSBP1	photosystem II oxygen-evolving enhancer protein 2 [Salvia splendens]	Metabolism	Energy metabolism	ko00195//Photosynthesis	K02717	GO:0005576//extracellular region;GO:0009521//photosystem;GO:0009526//plastid envelope;GO:0009532//plastid stroma;GO:0031978//plastid thylakoid lumen;GO:0044434//chloroplast part	GO:0008187//poly-pyrimidine tract binding;GO:0016628//oxidoreductase activity, acting on the CH-CH group of donors, NAD or NADP as acceptor;GO:0046872//metal ion binding	GO:0000097//sulfur amino acid biosynthetic process;GO:0006605//protein targeting;GO:0006996//organelle organization;GO:0009617//response to bacterium;GO:0009620//response to fungus;GO:0009639//response to red or far red light;GO:0009642//response to light intensity;GO:0009696//salicylic acid metabolic process;GO:0009755//hormone-mediated signaling pathway;GO:0009767//photosynthetic electron trans…
Unigene0005218	0.943734	0.834306	0.792962	1.317	16.13	1.44	1.943	1.167	1.467	1.087	0.32	9.667	106	9	15	9	12.667	8.333	2.333	MYB78	PREDICTED: transcription factor MYB108-like [Juglans regia]	-	-	-	-	GO:0043231//intracellular membrane-bounded organelle	GO:0001071//nucleic acid binding transcription factor activity;GO:0003676//nucleic acid binding	GO:0001101//response to acid chemical;GO:0006952//defense response;GO:0006972//hyperosmotic response;GO:0009404//toxin metabolic process;GO:0009694//jasmonic acid metabolic process;GO:0009755//hormone-mediated signaling pathway;GO:0009827//plant-type cell wall modification;GO:0010038//response to metal ion;GO:0010468//regulation of gene expression;GO:0014070//response to organic cyclic compound;G…
Unigene0005253	0.94693	0.86369	0.829303	5.387	16.53	6.347	3.633	5.6	2.16	4.627	2.483	41.667	122.333	44.667	31.333	49.667	21	39	20.333	--	Formin-like protein [Actinidia chinensis var. chinensis] [Actinidia chinensis]	-	-	-	-	-	-	-
Unigene0005317	0.934918	0.81644	0.767533	0	5.263	0	0.063	0	0	0	0	0	23.667	0	0.333	0	0	0	0	PCKR1	cyclophilin [Pinus massoniana]	-	-	-	-	-	-	-
Unigene0005368	0.800249	0.756075	0.793152	1.64	6.99	0.55	4.917	0.987	0.33	0.617	0.21	18.333	70.333	5.333	60	11.667	4.333	7	2.333	ERF1B	ORA1 [Salvia miltiorrhiza]	Environmental Information Processing;Environmental Information Processing	Signal transduction;Signal transduction	ko04016//MAPK signaling pathway - plant;ko04075//Plant hormone signal transduction	K14516;K14516	GO:0043231//intracellular membrane-bounded organelle	GO:0001071//nucleic acid binding transcription factor activity;GO:0003676//nucleic acid binding	GO:0000160//phosphorelay signal transduction system;GO:0006950//response to stress;GO:0009755//hormone-mediated signaling pathway;GO:0010468//regulation of gene expression;GO:0034645//cellular macromolecule biosynthetic process
Unigene0005392	0.889795	0.846358	0.809621	9.873	55.37	33.263	27.683	2.247	16.033	22.163	6.59	96	492.667	289	287.667	25.667	186	230.667	64.667	ERF106	ethylene-responsive transcription factor ERF107 [Sesamum indicum]	-	-	-	-	-	GO:0003677//DNA binding	GO:0006355//regulation of transcription, DNA-templated;GO:0009605//response to external stimulus;GO:0044763//single-organism cellular process
Unigene0005441	0.957742	0.850764	0.79499	3.12	70.89	12.603	7.647	2.977	6.877	6.36	3.93	44.667	943	158	114	48	119.667	96.667	57.667	PNC1	PREDICTED: cationic peroxidase 1-like [Erythranthe guttata]	Metabolism;Metabolism;Metabolism	Global and overview maps;Global and overview maps;Biosynthesis of other secondary metabolites	ko01100//Metabolic pathways;ko01110//Biosynthesis of secondary metabolites;ko00940//Phenylpropanoid biosynthesis	K00430;K00430;K00430	-	GO:0003824//catalytic activity;GO:0043169//cation binding;GO:0046906//tetrapyrrole binding	GO:0006950//response to stress;GO:0042743//hydrogen peroxide metabolic process;GO:0044710//single-organism metabolic process
Unigene0005611	0.939669	0.820011	0.772751	4.767	87.477	4.157	2.607	1.203	2.207	7.98	1.11	40	664.667	30.333	23.667	11.667	22	73	9.333	--	-	-	-	-	-	-	-	-
Unigene0005661	0.932383	0.943821	0.912346	1.78	4.923	3.29	1.077	1.173	0.257	0.59	0.223	35.667	93.667	59.667	22.667	27	6.333	12.333	4.667	WRKY22	WRKY protein [Salvia miltiorrhiza]	Organismal Systems;Environmental Information Processing	Environmental adaptation;Signal transduction	ko04626//Plant-pathogen interaction;ko04016//MAPK signaling pathway - plant	K13426;K13426	-	GO:0003677//DNA binding	GO:0002252//immune effector process;GO:0007165//signal transduction;GO:0010243//response to organonitrogen compound;GO:0010260//organ senescence;GO:0010468//regulation of gene expression
Unigene0005892	0.968015	0.876333	0.841476	7.17	33.43	9.617	7.703	5.51	5.343	7.863	2.177	107.667	467.667	131.333	126	95.333	98	128.333	33.667	AHL17	PREDICTED: AT-hook motif nuclear-localized protein 17-like [Erythranthe guttata]	-	-	-	-	-	-	-
Unigene0005908	0.915418	0.897597	0.902638	71.12	133.337	42.057	44.333	43.1	13.57	16.89	28.847	729.667	1292	390	498.667	510.667	171.333	188.333	308	--	PREDICTED: sigma factor binding protein 1, chloroplastic-like [Erythranthe guttata]	-	-	-	-	-	-	-
Unigene0006159	0.818923	0.768452	0.748547	34.92	83.25	29.91	14.253	46.227	3.777	6.923	14.733	431	977.333	332.667	186.667	658.667	58	92.333	191.333	DMP3	protein DMP3-like [Camellia sinensis]	-	-	-	-	GO:0005774//vacuolar membrane	-	-
Unigene0006301	0.749387	0.809648	0.752889	57.313	127.053	152.72	35.107	37.073	23.11	37.913	30.28	335.667	718.333	817.333	219.333	257	170.333	244.333	188.333	--	Regulator of telomere elongation helicase [Actinidia chinensis var. chinensis] [Actinidia chinensis]	-	-	-	-	-	-	GO:0006950//response to stress;GO:0009719//response to endogenous stimulus;GO:0010033//response to organic substance;GO:0044763//single-organism cellular process
Unigene0006309	0.94659	0.828623	0.775204	0.22	3.883	0.583	0.057	0.073	0.097	0.68	0	5.333	83.333	12.333	1.333	2	2.667	17.333	0	VLN4	PREDICTED: villin-4-like isoform X2 [Erythranthe guttata]	-	-	-	-	GO:0044444//cytoplasmic part	GO:0003779//actin binding	GO:0001101//response to acid chemical;GO:0008154//actin polymerization or depolymerization;GO:0022607//cellular component assembly;GO:0046907//intracellular transport;GO:0048588//developmental cell growth
Unigene0006841	0.951872	0.851971	0.812826	74.113	541.777	33.34	23.667	16.953	6.257	26.493	15.81	809.333	5711.67	333.333	281.667	217.333	86.667	318.333	184.333	DIR21	dirigent protein 21 [Sesamum indicum]	-	-	-	-	GO:0030312//external encapsulating structure	-	-
Unigene0007048	0.929136	0.809099	0.775363	8.22	27.5	7.527	7.32	8.09	6.133	9.51	4.99	213	660.667	173.667	199	237.667	193.333	263.667	132.667	At5g41800	upstream-binding transcription factor [Salvia splendens]	-	-	-	-	GO:0031224//intrinsic component of membrane	-	GO:0006812//cation transport;GO:0046942//carboxylic acid transport
Unigene0007049	0.670584	0.788231	0.760651	1.213	2.863	4.523	1.36	0	0	0	0	14	36.667	56	16.667	0	0	0	0	mt:Cyt-b	apocytochrome b [Capsaspora owczarzaki]	Metabolism;Metabolism	Global and overview maps;Energy metabolism	ko01100//Metabolic pathways;ko00190//Oxidative phosphorylation	K00412;K00412	GO:0016020//membrane;GO:0043231//intracellular membrane-bounded organelle;GO:0044444//cytoplasmic part	GO:0005488//binding	GO:0044237//cellular metabolic process;GO:0055114//oxidation-reduction process
Unigene0007314	0.938838	0.821895	0.770765	0	3.15	0.057	0	0	0	0	0	0	19.667	0.333	0	0	0	0	0	HTA1	histone H2A [Quercus suber]	-	-	-	-	GO:0000785//chromatin;GO:0030312//external encapsulating structure;GO:0043231//intracellular membrane-bounded organelle	GO:0003676//nucleic acid binding;GO:0046983//protein dimerization activity	GO:0006950//response to stress;GO:0009292//genetic transfer;GO:0009451//RNA modification;GO:0044699//single-organism process;GO:0051707//response to other organism
Unigene0007359	0.942919	0.846073	0.818116	31.937	125.99	13.857	15.417	6.837	13.41	23.75	6.76	535.333	1896.67	200.667	277.667	129.667	264.667	422.667	113	--	PLATZ transcription factor family protein [Striga asiatica]	-	-	-	-	-	-	GO:0009408//response to heat
Unigene0007514	0.933292	0.809966	0.759567	0.147	34.243	0.52	0.433	0.293	0.083	1.423	0.35	1	205.333	3	2.667	2.333	0.667	10.667	2.333	--	cleavage and polyadenylation specificity factor73-I [Striga asiatica]	-	-	-	-	GO:0043231//intracellular membrane-bounded organelle	-	GO:0006950//response to stress
Unigene0007520	0.936213	0.818077	0.768407	0.28	68.65	0.597	0.723	0.167	0.15	0.327	0.31	2	467.333	4	5.667	1.333	1.333	2.667	2.333	--	collagen alpha-1(II) chain [Jatropha curcas]	-	-	-	-	-	-	-
Unigene0007577	0.786917	0.819458	0.786899	12.803	23.393	20.783	6.007	12.843	1.79	5.577	5.66	298.667	522	440.667	148	350.667	52.333	141.333	139.667	--	protein ANTAGONIST OF LIKE HETEROCHROMATIN PROTEIN 1 [Sesamum indicum]	-	-	-	-	GO:0009536//plastid;GO:0031090//organelle membrane	-	GO:0006812//cation transport
Unigene0007858	0.795585	0.885089	0.910673	124.303	145.133	110.32	66.63	68.977	25.537	35.563	35.79	1322.33	1471.33	1060.67	760.333	868	338.333	410	400.333	--	VPS10 2 like [Actinidia chinensis var. chinensis] [Actinidia chinensis]	-	-	-	-	-	-	-
Unigene0008006	0.870303	0.926904	0.884777	2.507	8.093	7.463	1.503	0	0	0	0	20.333	73	64.667	12.667	0	0	0	0	Sftpc	-	-	-	-	-	-	-	-
Unigene0008034	0.971651	0.88565	0.842339	4.323	14.92	5.313	3.45	3.873	2.14	3.677	3.023	159	502.333	173	129.667	157	94.667	140	112.667	SCO2	calmodulin-like protein 1 [Sesamum indicum]	-	-	-	-	GO:0044434//chloroplast part	GO:0005515//protein binding;GO:0016628//oxidoreductase activity, acting on the CH-CH group of donors, NAD or NADP as acceptor;GO:0016864//intramolecular oxidoreductase activity, transposing S-S bonds	GO:0009657//plastid organization;GO:0044267//cellular protein metabolic process;GO:0044710//single-organism metabolic process
Unigene0008187	0.922857	0.789704	0.739387	0.76	205.143	2.3	1.31	0.597	1.293	22.963	0.463	20	4901	53	36	18.667	40.667	684.333	12.333	MLS	PREDICTED: malate synthase, glyoxysomal [Erythranthe guttata]	Metabolism;Metabolism;Metabolism;Metabolism;Metabolism	Global and overview maps;Global and overview maps;Global and overview maps;Carbohydrate metabolism;Carbohydrate metabolism	ko01100//Metabolic pathways;ko01110//Biosynthesis of secondary metabolites;ko01200//Carbon metabolism;ko00620//Pyruvate metabolism;ko00630//Glyoxylate and dicarboxylate metabolism	K01638;K01638;K01638;K01638;K01638	GO:0005777//peroxisome	GO:0046912//transferase activity, transferring acyl groups, acyl groups converted into alkyl on transfer	GO:0006101//citrate metabolic process;GO:0044262//cellular carbohydrate metabolic process
Unigene0008294	0.930148	0.807685	0.761148	0.21	3.553	0.06	0.047	0.133	0	0.25	0.103	1.333	21	0.333	0.333	1	0	1.667	0.667	CYP71AU51	cytochrome P450 CYP71AU51 [Salvia miltiorrhiza]	-	-	-	-	GO:0016020//membrane;GO:0043227//membrane-bounded organelle	GO:0004497//monooxygenase activity;GO:0016705//oxidoreductase activity, acting on paired donors, with incorporation or reduction of molecular oxygen;GO:0046872//metal ion binding	GO:0044699//single-organism process
Unigene0008396	0.926226	0.804305	0.760609	2.55	38.967	0.523	1.677	2.607	0.42	2.273	1.417	48.333	729	9.333	34	57.667	10.333	51.333	29.333	HIPP07	heavy metal transport/detoxification superfamily protein, partial [Striga asiatica]	-	-	-	-	GO:0016020//membrane;GO:0044424//intracellular part	GO:0046872//metal ion binding	GO:0006812//cation transport;GO:0006875//cellular metal ion homeostasis;GO:0009791//post-embryonic development;GO:0045087//innate immune response
Unigene0008571	0.934143	0.815043	0.765016	0	2.843	0	0	0	0	0	0	0	19.333	0	0	0	0	0	0	eglD	PREDICTED: probable endo-beta-1,4-glucanase D [Pyrus x bretschneideri]	-	-	-	-	-	-	-
Unigene0008669	0.908812	0.792981	0.742018	222.083	823.837	178.72	73.783	227.63	87.277	178.827	181.197	8322.67	28755	5981.67	2949.33	9882	3992.67	7051.67	6997	RFS6	probable galactinol--sucrose galactosyltransferase 6 [Sesamum indicum]	Metabolism;Metabolism	Global and overview maps;Carbohydrate metabolism	ko01100//Metabolic pathways;ko00052//Galactose metabolism	K06617;K06617	GO:0005911//cell-cell junction;GO:0009536//plastid	GO:0004557//alpha-galactosidase activity;GO:0008378//galactosyltransferase activity	GO:0006950//response to stress;GO:0009313//oligosaccharide catabolic process;GO:0009628//response to abiotic stimulus;GO:0009746//response to hexose;GO:0034285//response to disaccharide
Unigene0008911	0.93397	0.813729	0.759623	2.65	158.61	6.667	2.04	2.367	8.363	5.51	3.473	76	4231.67	169.333	59.333	76.333	294	167	102.667	POX1	proline dehydrogenase [Salvia splendens]	Metabolism;Metabolism;Metabolism	Global and overview maps;Global and overview maps;Amino acid metabolism	ko01100//Metabolic pathways;ko01110//Biosynthesis of secondary metabolites;ko00330//Arginine and proline metabolism	K00318;K00318;K00318	GO:0043231//intracellular membrane-bounded organelle	GO:0016645//oxidoreductase activity, acting on the CH-NH group of donors	GO:0001101//response to acid chemical;GO:0006536//glutamate metabolic process;GO:0006560//proline metabolic process;GO:0006605//protein targeting;GO:0006950//response to stress;GO:0009404//toxin metabolic process;GO:0009694//jasmonic acid metabolic process;GO:0009755//hormone-mediated signaling pathway;GO:0014070//response to organic cyclic compound;GO:0043067//regulation of programmed cell death…
Unigene0009034	0.943768	0.856266	0.836246	4.1	27.36	5.4	10.427	2.797	2.347	4.633	3.127	70.667	425.333	80.333	186.667	52.667	47.667	82.333	53.667	surE	5'-nucleotidase [Salvia splendens]	Metabolism;Metabolism;Metabolism;Metabolism;Metabolism	Global and overview maps;Global and overview maps;Nucleotide metabolism;Nucleotide metabolism;Metabolism of cofactors and vitamins	ko01100//Metabolic pathways;ko01110//Biosynthesis of secondary metabolites;ko00230//Purine metabolism;ko00240//Pyrimidine metabolism;ko00760//Nicotinate and nicotinamide metabolism	K03787;K03787;K03787;K03787;K03787	GO:0044444//cytoplasmic part	GO:0008252//nucleotidase activity	-
Unigene0009068	0.83655	0.788084	0.778362	75.273	148.413	66.88	51.353	89.973	25.79	36.4	40.7	1962.33	3608.67	1554	1409	2633	822	1000.67	1095	WRKY42	WRKY protein [Salvia miltiorrhiza]	-	-	-	-	-	GO:0003677//DNA binding	GO:0010468//regulation of gene expression
Unigene0009086	0.908163	0.838418	0.817557	7.583	20.473	3.527	5.133	4.303	6.233	2.087	3.137	98	242.333	40	71	62.333	96.667	27.667	41	LOG1	cytokinin riboside 5'-monophosphate phosphoribohydrolase LOG1-like [Sesamum indicum]	-	-	-	-	GO:0043231//intracellular membrane-bounded organelle;GO:0044444//cytoplasmic part	GO:0016798//hydrolase activity, acting on glycosyl bonds	GO:0000041//transition metal ion transport;GO:0001101//response to acid chemical;GO:0009267//cellular response to starvation;GO:0009690//cytokinin metabolic process;GO:0009725//response to hormone;GO:0015698//inorganic anion transport
Unigene0009098	0.850267	0.866899	0.852012	20.87	32.753	22.187	8.997	16.91	5.577	9.043	7.853	548.333	830.667	534.333	252.667	512.333	184	256	218.667	PROT1	proline transporter 2-like [Dorcoceras hygrometricum]	-	-	-	-	GO:0016020//membrane	GO:0008324//cation transmembrane transporter activity;GO:0046943//carboxylic acid transmembrane transporter activity	GO:0003333//amino acid transmembrane transport;GO:0006812//cation transport
Unigene0009188	0.934798	0.80995	0.759279	0.853	27.767	1.637	0.63	1.127	0.68	2.623	0.323	20.333	598	33.667	16	31.333	19.333	70	7.667	2021-10-04	organic cation/carnitine transporter 4 [Sesamum indicum]	-	-	-	-	GO:0005774//vacuolar membrane;GO:0031224//intrinsic component of membrane;GO:0044434//chloroplast part	GO:0005215//transporter activity;GO:0032550//purine ribonucleoside binding	GO:0009062//fatty acid catabolic process;GO:0009072//aromatic amino acid family metabolic process;GO:0009404//toxin metabolic process;GO:0014070//response to organic cyclic compound;GO:0015698//inorganic anion transport
Unigene0009207	0.773478	0.855897	0.827431	4.003	16.693	19.61	8.463	0	0	0	0	36.667	171	193.667	82.667	0	0	0	0	DERP3	serine protease 27-like [Chlorella sorokiniana]	-	-	-	-	-	-	-
Unigene0009258	0.939233	0.828951	0.789145	0.97	21.457	0.977	2.96	0.917	0.823	0.637	0.837	25.667	522.333	22.667	83.667	27.333	26.333	19	22.667	GH3.1	auxin responsive GH3 protein family [Salvia splendens]	Environmental Information Processing	Signal transduction	ko04075//Plant hormone signal transduction	K14487	-	GO:0016881//acid-amino acid ligase activity	GO:0009725//response to hormone;GO:0014070//response to organic cyclic compound;GO:0048878//chemical homeostasis
Unigene0009424	0.914753	0.830805	0.798154	15.007	43.377	18.327	14.16	20.5	7.48	11.76	10.923	400.333	1073.33	436.333	394	604.667	242.333	327.333	298.667	At5g60570	F-box/kelch-repeat protein At5g60570 [Sesamum indicum]	-	-	-	-	-	GO:0003824//catalytic activity	-
Unigene0009440	0.727877	0.768353	0.842182	42.317	61.897	28.89	52.453	32.267	9.307	15.767	12.697	407	548.667	249.667	548.333	340	108	156.333	124.333	CAD	cinnamyl alcohol dehydrogenase [Salvia miltiorrhiza]	-	-	-	-	-	GO:0016491//oxidoreductase activity;GO:0046872//metal ion binding	-
Unigene0009478	0.724283	0.779497	0.754976	2.82	3.64	2.22	0.19	1.04	2	0.05	0.4	57.667	66	38	3.667	24.667	47	1	8	--	-	-	-	-	-	-	-	-
Unigene0009725	0.880979	0.816751	0.839314	4.583	11.893	1.51	4.793	3.377	0.83	2.047	0.657	98.333	232.333	28	109.333	79.333	21	47	14	--	oviduct-specific glycoprotein [Salvia splendens]	-	-	-	-	-	-	-
Unigene0009751	0.893491	0.906411	0.866341	11.16	19.26	15.497	6.427	4.86	5.147	9.553	6.12	113.667	188.667	144.667	70.667	58.333	66	104.333	66	--	cysteine/Histidine-rich C1 domain family protein [Striga asiatica]	-	-	-	-	-	-	GO:0002376//immune system process;GO:0006812//cation transport;GO:0006952//defense response;GO:0009987//cellular process;GO:0046942//carboxylic acid transport;GO:0048364//root development;GO:0071705//nitrogen compound transport;GO:1901698//response to nitrogen compound
Unigene0009836	0.93304	0.812608	0.761958	0.39	63.98	0.517	0.107	0.607	0.5	0.83	0.397	2.667	388.667	3	0.667	4.333	4	6	2.667	--	hypothetical protein Saspl_013642 [Salvia splendens]	-	-	-	-	-	-	-
Unigene0009910	0.882058	0.964509	0.974385	3.497	6.02	4.623	3.713	0.75	1.283	1.21	1.083	53.333	82.667	62.333	58.333	12.333	23	18.667	16.333	--	cold regulated gene 27 [Striga asiatica]	-	-	-	-	-	-	-
Unigene0009986	0.968003	0.909687	0.873308	17.37	79.883	37.397	22.843	7.16	11.607	24.433	3.65	565.333	2385.33	1098.33	816	276	450	864	120	CSLE1	cellulose synthase A [Salvia splendens]	-	-	-	-	-	GO:0016740//transferase activity	-
Unigene0010285	0.94302	0.83806	0.798309	3.723	60.117	4.133	7.607	5.04	0.913	0.467	2.677	41.333	635.333	41.667	93	63	12.667	5.667	31.333	--	late embryogenesis abundant protein At1g64065-like [Sesamum indicum]	-	-	-	-	-	-	-
Unigene0010334	0.971585	0.881851	0.849881	19.347	102.11	18.993	18.843	8.88	6.497	15.323	6.563	828	3938.67	716.333	859.333	425	328.667	696.667	280.667	TPS11	probable alpha,alpha-trehalose-phosphate synthase [UDP-forming] 11 [Sesamum indicum]	Metabolism;Metabolism;Metabolism	Global and overview maps;Global and overview maps;Carbohydrate metabolism	ko01100//Metabolic pathways;ko01110//Biosynthesis of secondary metabolites;ko00500//Starch and sucrose metabolism	K16055;K16055;K16055	GO:0043231//intracellular membrane-bounded organelle;GO:0044444//cytoplasmic part	GO:0019203//carbohydrate phosphatase activity;GO:0035251//UDP-glucosyltransferase activity	GO:0005982//starch metabolic process;GO:0005991//trehalose metabolic process;GO:0006796//phosphate-containing compound metabolic process;GO:0009893//positive regulation of metabolic process
Unigene0010338	0.948859	0.843109	0.800298	13.243	73.94	10.557	2.237	3.893	2.263	13.63	2.96	238	1204.33	163.667	42.333	79.333	48.333	262.667	53.333	AGT1	alanine-glyoxylate transaminase / serine-glyoxylate transaminase / serine-pyruvate transaminase [Salvia splendens]	Metabolism;Metabolism;Metabolism;Metabolism;Cellular Processes;Metabolism;Metabolism	Global and overview maps;Global and overview maps;Global and overview maps;Carbohydrate metabolism;Transport and catabolism;Amino acid metabolism;Amino acid metabolism	ko01100//Metabolic pathways;ko01110//Biosynthesis of secondary metabolites;ko01200//Carbon metabolism;ko00630//Glyoxylate and dicarboxylate metabolism;ko04146//Peroxisome;ko00260//Glycine, serine and threonine metabolism;ko00250//Alanine, aspartate and glutamate metabolism	K00830;K00830;K00830;K00830;K00830;K00830;K00830	GO:0005576//extracellular region;GO:0009532//plastid stroma;GO:0016020//membrane;GO:0042579//microbody	GO:0008483//transaminase activity;GO:0043168//anion binding	GO:0006873//cellular ion homeostasis;GO:0006970//response to osmotic stress;GO:0009746//response to hexose;GO:0030001//metal ion transport;GO:0042044//fluid transport;GO:0043094//cellular metabolic compound salvage
Unigene0010452	0.926114	0.796997	0.747068	2.983	1505.56	3.443	2.433	15.657	0.473	103.873	0.547	99.667	46924.3	104.333	81.667	665	19.333	4048	19	BXL1	beta-D-xylosidase 4 [Salvia splendens]	-	-	-	-	GO:0005576//extracellular region;GO:0005618//cell wall;GO:0031012//extracellular matrix	GO:0015926//glucosidase activity	GO:0003006//developmental process involved in reproduction;GO:0042221//response to chemical;GO:0044238//primary metabolic process
Unigene0010549	0.64933	0.797719	0.836857	2.27	2.683	3.087	2.683	0.98	0.44	0.807	1.05	13	14	15.333	15	6.333	3	4.667	6	--	-	-	-	-	-	-	-	-
Unigene0010553	0.937054	0.838584	0.811873	14.917	58.587	6.02	8.96	8.307	3.62	8.31	6.717	138	518.667	50.667	92.333	90.667	42	83	65.667	--	FKBP-type peptidyl-prolyl cis-trans isomerase family protein [Hibiscus syriacus]	-	-	-	-	-	-	-
Unigene0010598	0.94941	0.928924	0.914863	47.69	93.517	54.483	32.407	28.707	15.297	37.667	17.723	356	664	372.333	264.667	247.333	142.333	307.667	139	--	PREDICTED: NADPH-dependent 1-acyldihydroxyacetone phosphate reductase-like [Erythranthe guttata]	-	-	-	-	-	-	-
Unigene0010670	0.639303	0.746969	0.71735	1.253	5.087	8.427	3.227	0	0	0	0	6	27.333	43.667	16.667	0	0	0	0	--	-	-	-	-	-	-	-	-
Unigene0010745	0.906332	0.79841	0.760447	0.88	4.483	0.507	1.33	0.437	0.61	0.71	1.3	3.667	18.667	2	6.667	2.333	3.333	3.333	6	--	UPF0494 membrane protein like [Actinidia chinensis var. chinensis] [Actinidia chinensis]	-	-	-	-	GO:0031224//intrinsic component of membrane	-	-
Unigene0010871	0.911033	0.916041	0.947311	677.037	1367.21	600.897	799.143	212.71	220.21	430.907	85.747	7545.67	14030.3	5875	9432	2646	2890	5156.67	956	FRAA2	pathogenesis-related protein 10 [Salvia miltiorrhiza]	-	-	-	-	-	GO:0004518//nuclease activity	GO:0008152//metabolic process;GO:0050896//response to stimulus
Unigene0011035	0.764063	0.788821	0.749186	201.267	402.37	370.133	89.027	236.39	50.013	93.753	77.85	2569.33	4942.33	4289	1211	3514.33	801	1337.67	1054	ZAT10	zinc finger protein ZAT10-like protein [Isodon rubescens]	-	-	-	-	GO:0043231//intracellular membrane-bounded organelle	GO:0003677//DNA binding;GO:0046872//metal ion binding	GO:0000160//phosphorelay signal transduction system;GO:0001101//response to acid chemical;GO:0002252//immune effector process;GO:0006355//regulation of transcription, DNA-templated;GO:0006972//hyperosmotic response;GO:0009642//response to light intensity;GO:0009694//jasmonic acid metabolic process;GO:0009755//hormone-mediated signaling pathway;GO:0010243//response to organonitrogen compound;GO:00…
Unigene0011098	0.77477	0.735606	0.759262	11.537	18.317	5.747	8.66	10.677	2.87	4.703	6.863	238	362.667	108.333	191	251	74.667	104.333	150.333	HEX6	PREDICTED: hexose carrier protein HEX6-like [Erythranthe guttata]	-	-	-	-	GO:0031224//intrinsic component of membrane	GO:0015291//secondary active transmembrane transporter activity;GO:0016628//oxidoreductase activity, acting on the CH-CH group of donors, NAD or NADP as acceptor	GO:0044710//single-organism metabolic process;GO:0044763//single-organism cellular process;GO:0044765//single-organism transport
Unigene0011212	0.680688	0.721501	0.733935	23.647	26.337	24.67	12.93	16.49	10.857	19.9	8.743	586.333	620	550.333	339	463	332.333	528.667	225.333	At3g28050	WAT1-related protein At3g28050-like [Olea europaea var. sylvestris] [Olea europaea]	-	-	-	-	GO:0016020//membrane	-	-
Unigene0011221	0.877786	0.820542	0.808908	17.687	35.467	20.407	13.74	9.88	7.6	22.317	6.77	645	1238.67	699.667	532.333	438.333	345	889.333	259	BXL2	beta-D-xylosidase 4 [Salvia splendens]	-	-	-	-	GO:0005576//extracellular region;GO:0005618//cell wall;GO:0031012//extracellular matrix	GO:0015926//glucosidase activity	GO:0003006//developmental process involved in reproduction;GO:0042221//response to chemical;GO:0044238//primary metabolic process
Unigene0011246	0.95054	0.944544	0.912841	4.12	9.857	5.527	2.853	3.233	1.023	1.34	2.263	34	76.333	40.667	23.333	31.333	10.333	11.667	19.333	CML44	calcium-binding protein CML [Salvia splendens]	Organismal Systems	Environmental adaptation	ko04626//Plant-pathogen interaction	K13448	-	GO:0046872//metal ion binding	-
Unigene0011260	0.685249	0.776412	0.777407	47.967	66.823	80.137	45.777	37.743	15.357	36.55	22.583	520	668	761	517	458.667	200.667	411.667	249	--	proline-tRNA ligase [Striga asiatica]	-	-	-	-	-	-	-
Unigene0011294	0.937819	0.876477	0.838601	40.773	68.653	43.16	28.627	29.013	27.857	40.743	28.48	459.333	719	437.667	342.667	371.333	380	476.333	327.667	NAC083	NAC domain-containing protein 83-like [Olea europaea var. sylvestris] [Olea europaea]	-	-	-	-	GO:0043231//intracellular membrane-bounded organelle	GO:0001071//nucleic acid binding transcription factor activity	GO:0006355//regulation of transcription, DNA-templated;GO:0006605//protein targeting;GO:0009725//response to hormone;GO:0009891//positive regulation of biosynthetic process;GO:0010087//phloem or xylem histogenesis;GO:0010260//organ senescence;GO:0043067//regulation of programmed cell death;GO:0046942//carboxylic acid transport
Unigene0011318	0.940084	0.901592	0.845398	2.543	9.04	5.327	1.537	2.697	1.667	1.647	1.043	35.667	125.667	70.667	24.333	48.667	30.333	27	16	AHL29	AT-hook motif nuclear-localized protein 29-like [Sesamum indicum]	-	-	-	-	GO:0043231//intracellular membrane-bounded organelle	GO:0001071//nucleic acid binding transcription factor activity	GO:0010468//regulation of gene expression
Unigene0011556	0.933289	0.857924	0.822226	3.473	15.967	7.327	3.433	1.94	0.227	6.407	0.713	85	357.667	165	90	56.333	6.667	175	17.667	PAE9	pectin acetylesterase 9 [Sesamum indicum]	-	-	-	-	-	-	-
Unigene0011666	0.934143	0.815043	0.765016	0	3.097	0	0	0	0	0	0	0	21	0	0	0	0	0	0	--	-	-	-	-	-	-	-	-
Unigene0011778	0.934143	0.815043	0.765016	0	3.54	0	0	0	0	0	0	0	20	0	0	0	0	0	0	--	-	-	-	-	-	-	-	-
Unigene0011896	0.831949	0.746419	0.730848	4.57	9.407	5.143	3.677	3.05	1.78	6.663	2.45	34.333	67.333	35.333	29.667	26	16.667	54.333	19.333	--	Chaperone protein dnaJ-related [Theobroma cacao]	-	-	-	-	-	GO:0005515//protein binding	-
Unigene0012046	0.691241	0.799824	0.783255	0.41	1.313	1.853	0.91	0	0	0	0	3.667	13	17.667	8.667	0	0	0	0	RpLP0	60S acidic ribosomal protein P0-like [Rhodamnia argentea]	Genetic Information Processing	Translation	ko03010//Ribosome	K02941	GO:0005576//extracellular region;GO:0005840//ribosome;GO:0005911//cell-cell junction;GO:0009536//plastid;GO:0016020//membrane	GO:0003824//catalytic activity;GO:0005198//structural molecule activity;GO:0046914//transition metal ion binding	GO:0006970//response to osmotic stress;GO:0009451//RNA modification;GO:0009725//response to hormone;GO:0010038//response to metal ion;GO:0010467//gene expression;GO:0034645//cellular macromolecule biosynthetic process;GO:0071555//cell wall organization
Unigene0012102	0.963359	0.871907	0.843296	16.017	52.81	13.727	11.993	8.95	6.857	14.833	7.323	353.667	1099.67	280.333	280	232.667	187	355.667	168.667	At5g09300	2-oxoisovalerate dehydrogenase E1 component alpha subunit [Salvia splendens]	Metabolism;Metabolism;Metabolism;Metabolism	Global and overview maps;Global and overview maps;Amino acid metabolism;Carbohydrate metabolism	ko01100//Metabolic pathways;ko01110//Biosynthesis of secondary metabolites;ko00280//Valine, leucine and isoleucine degradation;ko00640//Propanoate metabolism	K00166;K00166;K00166;K00166	GO:0044429//mitochondrial part	GO:0016624//oxidoreductase activity, acting on the aldehyde or oxo group of donors, disulfide as acceptor;GO:0043169//cation binding	GO:0009267//cellular response to starvation;GO:0009642//response to light intensity;GO:0034285//response to disaccharide;GO:0044710//single-organism metabolic process
Unigene0012265	0.93858	0.819613	0.767929	14.927	161.603	17.213	13.923	14.09	11.833	17.023	16.597	143.333	1489.33	153	148	161.333	143.333	179.333	169.333	XTH30	probable xyloglucan endotransglucosylase/hydrolase protein 30 [Sesamum indicum]	-	-	-	-	GO:0005576//extracellular region;GO:0030312//external encapsulating structure	GO:0016758//transferase activity, transferring hexosyl groups;GO:0016787//hydrolase activity	GO:0044042//glucan metabolic process;GO:0045229//external encapsulating structure organization
Unigene0012329	0.934143	0.815043	0.765016	0	3.823	0	0	0	0	0	0	0	24	0	0	0	0	0	0	htbA	histone H2B-like [Quercus suber]	-	-	-	-	-	-	-
Unigene0012351	0.914927	0.946027	0.901117	0.63	2.903	2.263	0.59	0	0	0	0	2.667	13.667	10.333	2.667	0	0	0	0	rps20	40S ribosomal protein S20 [Sphaeroforma arctica JP610]	Genetic Information Processing	Translation	ko03010//Ribosome	K02969	GO:0005911//cell-cell junction;GO:0009536//plastid;GO:0015935//small ribosomal subunit;GO:0030312//external encapsulating structure	GO:0004672//protein kinase activity;GO:0005198//structural molecule activity;GO:0032550//purine ribonucleoside binding	GO:0006464//cellular protein modification process;GO:0009451//RNA modification;GO:0010467//gene expression;GO:0010646//regulation of cell communication
Unigene0012352	0.934143	0.815043	0.765016	0	3.953	0	0	0	0	0	0	0	21	0	0	0	0	0	0	ARO2	chorismate synthase [Sphaeroforma arctica JP610]	Metabolism;Metabolism;Metabolism;Metabolism	Global and overview maps;Global and overview maps;Global and overview maps;Amino acid metabolism	ko01100//Metabolic pathways;ko01110//Biosynthesis of secondary metabolites;ko01230//Biosynthesis of amino acids;ko00400//Phenylalanine, tyrosine and tryptophan biosynthesis	K01736;K01736;K01736;K01736	GO:0009532//plastid stroma;GO:0043232//intracellular non-membrane-bounded organelle	GO:0003824//catalytic activity	GO:0006498//N-terminal protein lipidation;GO:0006950//response to stress;GO:0008652//cellular amino acid biosynthetic process;GO:0009699//phenylpropanoid biosynthetic process;GO:0046942//carboxylic acid transport
Unigene0012407	0.965866	0.873371	0.842188	4.047	14.44	4.457	4.173	2.08	2.41	4.827	2.25	53.667	176.667	52	58.667	30.333	38.667	66.667	30.333	--	death-associated inhibitor of apoptosis 1-like isoform X2 [Olea europaea var. sylvestris] [Olea europaea]	-	-	-	-	-	GO:0005515//protein binding	-
Unigene0012450	0.673961	0.763772	0.844134	47.417	42.577	15.363	27.807	3.107	4.66	12.493	7.397	449	360.333	128.667	282.333	33	51.667	124	69.333	TRY	myb proto-oncogene protein, plant [Salvia splendens]	-	-	-	-	GO:0043231//intracellular membrane-bounded organelle	GO:0001071//nucleic acid binding transcription factor activity;GO:0003676//nucleic acid binding	GO:0001101//response to acid chemical;GO:0003002//regionalization;GO:0006355//regulation of transcription, DNA-templated;GO:0010061//regulation of trichoblast fate specification;GO:0010454//negative regulation of cell fate commitment;GO:0030855//epithelial cell differentiation;GO:0048468//cell development
Unigene0012513	0.915262	0.794191	0.731176	7.407	39.677	18.717	11.347	11.253	7.587	17.537	9.46	179	940.333	423.667	286.667	315	233.333	465.667	245	NPF6.3	solute carrier family 15 (peptide/histidine transporter), member 3/4 [Salvia splendens]	-	-	-	-	GO:0031224//intrinsic component of membrane;GO:0043231//intracellular membrane-bounded organelle	GO:0015103//inorganic anion transmembrane transporter activity;GO:0015291//secondary active transmembrane transporter activity	GO:0001101//response to acid chemical;GO:0006694//steroid biosynthetic process;GO:0006950//response to stress;GO:0009664//plant-type cell wall organization;GO:0009755//hormone-mediated signaling pathway;GO:0010383//cell wall polysaccharide metabolic process;GO:0015698//inorganic anion transport;GO:0015833//peptide transport;GO:0019758//glycosinolate biosynthetic process;GO:0042126//nitrate metabo…
Unigene0012615	0.746884	0.889083	0.906182	2.533	2.993	3.273	1.443	0	0	0	0	35.667	46.667	48.333	21.667	0	0	0	0	phc-1	-	-	-	-	-	-	-	-
Unigene0012617	0.934143	0.815043	0.765016	0	3.807	0	0	0	0	0	0	0	25	0	0	0	0	0	0	YOP1	protein yop1-like [Quercus suber]	-	-	-	-	GO:0043231//intracellular membrane-bounded organelle	-	GO:0001101//response to acid chemical;GO:0006970//response to osmotic stress;GO:1901700//response to oxygen-containing compound
Unigene0012620	0.944008	0.831586	0.78116	1.743	12.717	1.853	0.737	1.597	0.84	1.527	1.107	21.333	145.333	20	9	22.333	12.667	19.667	14	LRK10L-1.3	Serine/threonine protein kinase [Handroanthus impetiginosus]	-	-	-	-	-	GO:0016772//transferase activity, transferring phosphorus-containing groups	-
Unigene0012709	0.825588	0.902652	0.864907	1.893	5.043	5.337	1.083	0	0	0	0	38.333	113.667	115.667	24.333	0	0	0	0	CHIA	probable chitinase 2 [Rhodamnia argentea]	Metabolism;Metabolism	Global and overview maps;Carbohydrate metabolism	ko01100//Metabolic pathways;ko00520//Amino sugar and nucleotide sugar metabolism	K01183;K01183	-	-	-
Unigene0012749	0.875079	0.747427	0.707304	0.657	4.18	0.733	0.567	1.54	0.417	0.693	0.353	15	86.333	14.333	12	37.667	11.333	16.667	8	Bp10	Multicopper oxidase [Handroanthus impetiginosus]	-	-	-	-	GO:0005576//extracellular region;GO:0005618//cell wall;GO:0005911//cell-cell junction;GO:0044444//cytoplasmic part	GO:0016682//oxidoreductase activity, acting on diphenols and related substances as donors, oxygen as acceptor;GO:0052689//carboxylic ester hydrolase activity	GO:0003006//developmental process involved in reproduction;GO:0006694//steroid biosynthetic process;GO:0009664//plant-type cell wall organization;GO:0009826//unidimensional cell growth;GO:0010383//cell wall polysaccharide metabolic process;GO:0042546//cell wall biogenesis;GO:0043479//pigment accumulation in tissues in response to UV light;GO:0048509//regulation of meristem development;GO:0048588/…
Unigene0012768	0.95867	0.866562	0.824735	22.13	119.987	16.027	1.503	3.333	6.36	12.35	0.997	149	718.333	92	10	25	50.333	91.333	6.667	--	high osmolarity signaling protein SHO1 [Striga asiatica]	-	-	-	-	-	-	-
Unigene0012809	0.933212	0.809446	0.75893	0.317	10.967	0.453	0.287	0.417	0.24	0.743	0.283	3	92.667	3.667	2.667	4.667	2.667	7.333	2.667	--	Phosphatidylserine decarboxylase beta chain like [Actinidia chinensis var. chinensis] [Actinidia chinensis]	-	-	-	-	-	-	-
Unigene0013082	0.680456	0.765284	0.725033	0.173	1.453	2.157	0.777	0	0	0	0	1.333	12.333	17.667	6.333	0	0	0	0	mt:ND2	NADH dehydrogenase subunit 2 [Gelidium crinale f. luxurians]	Metabolism;Metabolism	Global and overview maps;Energy metabolism	ko01100//Metabolic pathways;ko00190//Oxidative phosphorylation	K03879;K03879	-	-	-
Unigene0013392	0.71233	0.811076	0.781471	2.03	7.21	10.067	3.773	0	0	0	0	32.333	128	172.333	64	0	0	0	0	eef1a	elongation factor 1-alpha-like [Rhodamnia argentea]	Genetic Information Processing	Translation	ko03013//RNA transport	K03231	GO:0044424//intracellular part	GO:0008135//translation factor activity, RNA binding;GO:0016772//transferase activity, transferring phosphorus-containing groups;GO:0017111//nucleoside-triphosphatase activity;GO:0032550//purine ribonucleoside binding	GO:0010467//gene expression;GO:0034645//cellular macromolecule biosynthetic process
Unigene0013413	0.846379	0.725666	0.726174	3.083	16.893	1.613	7.593	4.78	1.887	4.38	1.843	41.667	221	20	117.333	73.667	32.333	65.667	26.667	--	PREDICTED: protein AUXIN-REGULATED GENE INVOLVED IN ORGAN SIZE-like [Erythranthe guttata]	-	-	-	-	-	-	-
Unigene0013421	0.675411	0.789424	0.855545	28.473	35.997	30.393	39.403	11.897	12.893	15.28	12.427	355.667	417.333	332.667	512.333	166.667	193.667	205.667	157.667	At1g64065	late embryogenesis abundant protein At1g64065-like [Sesamum indicum]	-	-	-	-	-	-	-
Unigene0013427	0.848228	0.812819	0.754617	5.903	15.07	11.737	3.08	2.557	3.36	8.56	2.97	142.667	345.333	257.667	80.667	71	101.333	219.667	75.333	CAT1	basic amino acid/polyamine antiporter, APA family [Salvia splendens]	-	-	-	-	GO:0031224//intrinsic component of membrane	GO:0005310//dicarboxylic acid transmembrane transporter activity;GO:0008324//cation transmembrane transporter activity	GO:0003333//amino acid transmembrane transport;GO:0006605//protein targeting;GO:0009404//toxin metabolic process;GO:0014070//response to organic cyclic compound;GO:0015672//monovalent inorganic cation transport;GO:0015748//organophosphate ester transport;GO:0015813//L-glutamate transport;GO:0016482//cytoplasmic transport;GO:0043067//regulation of programmed cell death;GO:0043092//L-amino acid imp…
Unigene0013535	0.918781	0.855978	0.870156	6.983	23.91	4.303	10.843	3.153	0.86	5.313	1.103	83.667	275.333	48	144.333	45.333	13	73.333	14	PYL4	abscisic acid receptor PYR/PYL family [Salvia splendens]	Environmental Information Processing;Environmental Information Processing	Signal transduction;Signal transduction	ko04016//MAPK signaling pathway - plant;ko04075//Plant hormone signal transduction	K14496;K14496	GO:0043231//intracellular membrane-bounded organelle	GO:0005515//protein binding;GO:0019840//isoprenoid binding;GO:0060089//molecular transducer activity	GO:0009755//hormone-mediated signaling pathway
Unigene0013668	0.955146	0.924745	0.907563	108.423	241.083	134.69	103.04	104.44	65.637	72.767	51.753	1563	3211	1733.33	1575.33	1671.67	1139	1113.67	759	--	PLATZ transcription factor family protein [Parasponia andersonii]	-	-	-	-	-	-	-
Unigene0013889	0.929126	0.808858	0.737069	16.3	85.507	22.323	7.75	11.57	15.857	20.983	21.277	460.667	2296.33	569.667	231.333	389.333	557	624	631.667	MIOX1	inositol oxygenase [Salvia splendens]	Metabolism;Metabolism;Metabolism	Global and overview maps;Carbohydrate metabolism;Carbohydrate metabolism	ko01100//Metabolic pathways;ko00562//Inositol phosphate metabolism;ko00053//Ascorbate and aldarate metabolism	K00469;K00469;K00469	GO:0044424//intracellular part	GO:0016701//oxidoreductase activity, acting on single donors with incorporation of molecular oxygen;GO:0043169//cation binding	GO:0006020//inositol metabolic process;GO:0019852//L-ascorbic acid metabolic process;GO:0048646//anatomical structure formation involved in morphogenesis
Unigene0014031	0.918267	0.903431	0.929366	18.893	34.46	12.943	16.683	10.94	3.75	9.623	6.267	1080.67	1810.33	656.333	1011.33	699	257.667	570	363.667	PR	dymeclin isoform X2 [Sesamum indicum]	-	-	-	-	-	GO:0004033//aldo-keto reductase (NADP) activity	GO:0044710//single-organism metabolic process;GO:1901564//organonitrogen compound metabolic process
Unigene0014223	0.934143	0.815043	0.765016	0	4.457	0	0	0	0	0	0	0	24.667	0	0	0	0	0	0	FQR1	NAD(P)H dehydrogenase (quinone) FQR1-like [Aegilops tauschii subsp. tauschii] [Aegilops tauschii]	Metabolism;Metabolism;Metabolism	Global and overview maps;Global and overview maps;Metabolism of cofactors and vitamins	ko01100//Metabolic pathways;ko01110//Biosynthesis of secondary metabolites;ko00130//Ubiquinone and other terpenoid-quinone biosynthesis	K03809;K03809;K03809	GO:0031090//organelle membrane;GO:0043231//intracellular membrane-bounded organelle;GO:0044444//cytoplasmic part	GO:0016655//oxidoreductase activity, acting on NAD(P)H, quinone or similar compound as acceptor;GO:0032553//ribonucleotide binding	GO:0006950//response to stress;GO:0009733//response to auxin;GO:0009987//cellular process;GO:0010038//response to metal ion;GO:0044710//single-organism metabolic process
Unigene0014501	0.935874	0.816154	0.765221	0.043	2.953	0.087	0	0.083	0.013	0.073	0.013	1	59.667	1.667	0	2	0.333	1.667	0.333	--	-	-	-	-	-	-	-	-
Unigene0014580	0.891914	0.769121	0.733457	5.51	54.867	10.287	19.697	1.39	11.267	18.53	7.737	43	391	71	161.667	12.667	104.667	152.333	60.667	--	sulfotransferase family cytosolic 1B member 1 [Striga asiatica]	-	-	-	-	-	-	-
Unigene0014661	0.777642	0.851058	0.806589	0.537	2.38	2.87	0.747	0	0	0	0	4.333	21.333	25	6.333	0	0	0	0	RpL8	60S ribosomal protein L8-like [Rhodamnia argentea]	Genetic Information Processing	Translation	ko03010//Ribosome	K02938	GO:0009536//plastid;GO:0015934//large ribosomal subunit;GO:0031090//organelle membrane	GO:0003723//RNA binding;GO:0005198//structural molecule activity;GO:0016740//transferase activity	GO:0003006//developmental process involved in reproduction;GO:0009059//macromolecule biosynthetic process;GO:0010467//gene expression
Unigene0014891	0.876748	0.810795	0.802265	16.867	36.393	10.893	8.283	16.38	6.49	7.707	4.757	491.333	998.667	292	253.333	536.333	233.333	241	144.333	VTE4	PREDICTED: tocopherol O-methyltransferase, chloroplastic isoform X2 [Erythranthe guttata]	Metabolism;Metabolism;Metabolism	Global and overview maps;Global and overview maps;Metabolism of cofactors and vitamins	ko01100//Metabolic pathways;ko01110//Biosynthesis of secondary metabolites;ko00130//Ubiquinone and other terpenoid-quinone biosynthesis	K05928;K05928;K05928	-	-	-
Unigene0014898	0.94532	0.830318	0.791154	0.503	9.807	1.39	2.037	0.503	0.44	1.687	0.487	10.333	181.333	24.333	44.667	11.667	10.667	35.333	10	DTX27	multidrug resistance protein, MATE family [Salvia splendens]	-	-	-	-	GO:0031224//intrinsic component of membrane	GO:0015291//secondary active transmembrane transporter activity	GO:0007275//multicellular organism development;GO:0015893//drug transport;GO:0044763//single-organism cellular process
Unigene0015287	0.867079	0.812652	0.835384	37.463	61.77	31.863	32.487	28.883	18.37	36.707	14.613	603	935.333	462.333	574.667	530	362.333	628.667	243.333	--	Calcium/calmodulin-dependent protein kinase [Handroanthus impetiginosus]	-	-	-	-	-	-	GO:0044237//cellular metabolic process
Unigene0015452	0.720014	0.800267	0.758459	0.673	4.313	5.89	1.95	0	0	0	0	4.333	31	40.667	13.333	0	0	0	0	rpl-12	60S ribosomal protein L12-like [Rhodamnia argentea]	Genetic Information Processing	Translation	ko03010//Ribosome	K02870	GO:0005911//cell-cell junction;GO:0009536//plastid;GO:0015934//large ribosomal subunit	GO:0003723//RNA binding;GO:0005198//structural molecule activity;GO:0046914//transition metal ion binding	GO:0006950//response to stress;GO:0009451//RNA modification;GO:0010467//gene expression;GO:0022613//ribonucleoprotein complex biogenesis
Unigene0015486	0.945932	0.834276	0.785478	0.043	6.647	0.293	0.29	0.013	0.123	0.017	0	1	135.333	5.667	6.667	0.333	3.333	0.333	0	--	-	-	-	-	-	-	-	-
Unigene0015516	0.935377	0.816914	0.767684	0	10.693	0.04	0.123	0.017	0.013	0.017	0	0	192	0.667	2.667	0.333	0.333	0.333	0	--	-	-	-	-	-	-	-	-
Unigene0015717	0.951478	0.862365	0.821498	14.56	60.937	15.84	10.177	15.523	4.473	8.187	9.557	226.667	890.333	220.667	166	281	85.667	135.667	154.333	--	UV excision repair protein [Actinidia chinensis var. chinensis] [Actinidia chinensis]	-	-	-	-	-	-	GO:0044763//single-organism cellular process;GO:0050789//regulation of biological process;GO:0050896//response to stimulus
Unigene0016008	0.962547	0.920362	0.922396	19.503	54.617	14.287	21.353	7.72	4.177	9.22	6.22	907.333	2306.67	601.333	1058.33	411.333	231.333	446.667	291	BCAT2	branched-chain-amino-acid aminotransferase 2, chloroplastic [Sesamum indicum]	Metabolism;Metabolism;Metabolism;Metabolism;Metabolism;Metabolism;Metabolism;Metabolism;Metabolism	Global and overview maps;Global and overview maps;Global and overview maps;Amino acid metabolism;Amino acid metabolism;Global and overview maps;Metabolism of cofactors and vitamins;Amino acid metabolism;Biosynthesis of other secondary metabolites	ko01100//Metabolic pathways;ko01110//Biosynthesis of secondary metabolites;ko01230//Biosynthesis of amino acids;ko00270//Cysteine and methionine metabolism;ko00280//Valine, leucine and isoleucine degradation;ko01210//2-Oxocarboxylic acid metabolism;ko00770//Pantothenate and CoA biosynthesis;ko00290//Valine, leucine and isoleucine biosynthesis;ko00966//Glucosinolate biosynthesis	K00826;K00826;K00826;K00826;K00826;K00826;K00826;K00826;K00826	GO:0009532//plastid stroma	GO:0004084//branched-chain-amino-acid transaminase activity	GO:0006549//isoleucine metabolic process;GO:0006551//leucine metabolic process;GO:0006573//valine metabolic process;GO:0008652//cellular amino acid biosynthetic process;GO:0009404//toxin metabolic process;GO:0009746//response to hexose;GO:0034285//response to disaccharide;GO:0035556//intracellular signal transduction;GO:0071554//cell wall organization or biogenesis
Unigene0016009	0.944216	0.987085	0.980277	0.893	1.84	1.097	0.56	0.223	0.053	0.117	0.1	18.333	33.667	20.333	12.333	5.333	1.333	2.333	2	BCAT2	branched-chain-amino-acid aminotransferase 2, chloroplastic [Sesamum indicum]	Metabolism;Metabolism;Metabolism;Metabolism;Metabolism;Metabolism;Metabolism;Metabolism;Metabolism	Global and overview maps;Global and overview maps;Global and overview maps;Amino acid metabolism;Amino acid metabolism;Global and overview maps;Metabolism of cofactors and vitamins;Amino acid metabolism;Biosynthesis of other secondary metabolites	ko01100//Metabolic pathways;ko01110//Biosynthesis of secondary metabolites;ko01230//Biosynthesis of amino acids;ko00270//Cysteine and methionine metabolism;ko00280//Valine, leucine and isoleucine degradation;ko01210//2-Oxocarboxylic acid metabolism;ko00770//Pantothenate and CoA biosynthesis;ko00290//Valine, leucine and isoleucine biosynthesis;ko00966//Glucosinolate biosynthesis	K00826;K00826;K00826;K00826;K00826;K00826;K00826;K00826;K00826	GO:0009532//plastid stroma	GO:0004084//branched-chain-amino-acid transaminase activity	GO:0006549//isoleucine metabolic process;GO:0006551//leucine metabolic process;GO:0006573//valine metabolic process;GO:0008652//cellular amino acid biosynthetic process;GO:0009404//toxin metabolic process;GO:0009746//response to hexose;GO:0034285//response to disaccharide;GO:0035556//intracellular signal transduction;GO:0071554//cell wall organization or biogenesis
Unigene0016149	0.911356	0.778455	0.743042	0.19	1.69	0.2	0.24	0.123	0.06	0.533	0.053	3.667	29	3.333	4.667	2.667	1.333	11	1	--	-	-	-	-	-	-	-	-
Unigene0016218	0.944076	0.830583	0.774996	1.09	9.103	2.537	1.203	0.367	1.027	2.823	0.817	5.333	40.667	11	6	2	6	15	4	--	Protein ORANGE-ORANGE like [Actinidia chinensis var. chinensis] [Actinidia chinensis]	-	-	-	-	-	GO:0005515//protein binding	-
Unigene0016893	0.848049	0.779055	0.746262	2.397	10.177	4.693	4.643	5.06	0.62	1.827	3.46	31	129.667	56	67.667	76	10.333	25.333	48.333	SCPL50	vitellogenic carboxypeptidase-like protein [Salvia splendens]	-	-	-	-	GO:0043231//intracellular membrane-bounded organelle	GO:0004180//carboxypeptidase activity	GO:0019538//protein metabolic process
Unigene0017041	0.934143	0.815043	0.765016	0	3.89	0	0	0	0	0	0	0	21.333	0	0	0	0	0	0	--	-	-	-	-	-	-	-	-
Unigene0017116	0.946006	0.864659	0.850634	20.2	52.543	12.807	13.93	7.77	9.357	17.167	6.643	561.333	1360.33	322.667	413.333	250.667	317	515	190	Ni6	CASP-like protein 8 [Striga asiatica]	-	-	-	-	GO:0031224//intrinsic component of membrane	-	-
Unigene0017200	0.71863	0.832494	0.818146	0.397	0.973	1.31	0.59	0	0	0	0	4	11	14	6.333	0	0	0	0	EEF1G	eukaryotic translation elongation factor 1 gamma [Capsaspora owczarzaki ATCC 30864]	-	-	-	-	GO:0016020//membrane;GO:0043231//intracellular membrane-bounded organelle;GO:0044444//cytoplasmic part	-	-
Unigene0017368	0.923975	0.791287	0.73842	0.537	13.953	1.053	0.21	0.247	0.75	2.503	0.14	10	237	17	4	5.333	16.667	50.667	2.667	ZOG1	zeatin O-xylosyltransferase [Salvia splendens]	Metabolism	Metabolism of terpenoids and polyketides	ko00908//Zeatin biosynthesis	K13495	-	GO:0016757//transferase activity, transferring glycosyl groups	-
Unigene0017416	0.935053	0.809969	0.758298	1.723	46.2	3.253	2.697	2.19	1.49	4.673	2.643	34.333	881	58.667	59.667	50.667	37.333	100	55.667	At3g08860	alanine-glyoxylate transaminase / (R)-3-amino-2-methylpropionate-pyruvate transaminase [Salvia splendens]	Metabolism;Metabolism;Metabolism;Metabolism;Metabolism;Metabolism	Global and overview maps;Global and overview maps;Amino acid metabolism;Amino acid metabolism;Amino acid metabolism;Amino acid metabolism	ko01100//Metabolic pathways;ko01110//Biosynthesis of secondary metabolites;ko00270//Cysteine and methionine metabolism;ko00280//Valine, leucine and isoleucine degradation;ko00260//Glycine, serine and threonine metabolism;ko00250//Alanine, aspartate and glutamate metabolism	K00827;K00827;K00827;K00827;K00827;K00827	GO:0043231//intracellular membrane-bounded organelle	GO:0008483//transaminase activity;GO:0043168//anion binding	GO:0009827//plant-type cell wall modification;GO:0031669//cellular response to nutrient levels;GO:0043094//cellular metabolic compound salvage;GO:0044767//single-organism developmental process
Unigene0017581	0.718319	0.799086	0.821103	0.693	2.71	2.39	2.767	0	0	0	0	4	17.333	14.667	17.667	0	0	0	0	MT1	metallothionein-like protein [Pyrus ussuriensis x Pyrus communis]	-	-	-	-	-	GO:0043169//cation binding	-
Unigene0017621	0.739295	0.728539	0.776335	10.017	14.02	8.213	8.597	9.84	2.757	7.263	3.827	467.667	613.333	348.333	427.333	520	158	356.667	185	ILK1	PREDICTED: probable serine/threonine-protein kinase drkD [Erythranthe guttata]	-	-	-	-	GO:0016020//membrane;GO:0043231//intracellular membrane-bounded organelle;GO:0044444//cytoplasmic part	GO:0004674//protein serine/threonine kinase activity	GO:0001101//response to acid chemical;GO:0006468//protein phosphorylation;GO:0006605//protein targeting;GO:0006972//hyperosmotic response;GO:0009694//jasmonic acid metabolic process;GO:0009755//hormone-mediated signaling pathway;GO:0010243//response to organonitrogen compound;GO:0010646//regulation of cell communication;GO:0043067//regulation of programmed cell death
Unigene0017704	0.916922	0.785857	0.720023	0	9.4	1.817	0	0	0.97	2.313	0	0	71	13	0	0	9.667	20.333	0	--	-	-	-	-	-	-	-	-
Unigene0017711	0.702583	0.734141	0.784888	0.413	1.633	0.55	1.767	0	0	0	0	9.667	42.333	13.333	46	0	0	0	0	BXL1	beta-D-xylosidase [Pyrus ussuriensis x Pyrus communis]	-	-	-	-	GO:0005576//extracellular region;GO:0005618//cell wall;GO:0031012//extracellular matrix	GO:0015926//glucosidase activity	GO:0003006//developmental process involved in reproduction;GO:0042221//response to chemical;GO:0044238//primary metabolic process
Unigene0018283	0.934143	0.815043	0.765016	0	3.17	0	0	0	0	0	0	0	25.333	0	0	0	0	0	0	--	actin patches distal protein 1-like [Quercus suber]	-	-	-	-	-	-	-
Unigene0018331	0.885705	0.825122	0.806181	8.663	18.31	6.193	4.277	8.327	2.813	3.593	4.383	295.333	583.333	187.667	155	322	117	128	154	At3g47420	MFS transporter [Salvia splendens]	-	-	-	-	GO:0031224//intrinsic component of membrane	-	GO:0044763//single-organism cellular process;GO:0044765//single-organism transport
Unigene0018625	0.94955	0.950243	0.943935	12.903	25	11.967	9.643	7.443	8.41	4.63	3.707	195	345	161.667	154.667	125.667	150	74.333	56	--	non-lysosomal glucosylceramidase [Salvia splendens]	-	-	-	-	-	-	-
Unigene0018713	0.733367	0.821652	0.785675	0.47	1.967	2.623	0.89	0	0	0	0	3.333	15.667	20	6.667	0	0	0	0	Parcxpwex01	40S ribosomal protein S3a-like [Rhodamnia argentea]	Genetic Information Processing	Translation	ko03010//Ribosome	K02984	-	-	-
Unigene0018758	0.932102	0.81244	0.76089	0	2.36	0.043	0.037	0.063	0.033	0	0.04	0	18.667	0.333	0.333	0.667	0.333	0	0.333	--	ATP-dependent DNA helicase PIF1-like, partial [Arabidopsis lyrata subsp. lyrata] [Arabidopsis lyrata]	-	-	-	-	-	-	-
Unigene0018801	0.64243	0.750259	0.714949	0.383	1.363	2.297	0.7	0	0	0	0	6	23.667	38.333	11.333	0	0	0	0	ND4	NADH dehydrogenase subunit 4 [Grateloupia angusta]	Metabolism;Metabolism	Global and overview maps;Energy metabolism	ko01100//Metabolic pathways;ko00190//Oxidative phosphorylation	K03881;K03881	GO:0016020//membrane	-	GO:0008152//metabolic process
Unigene0019199	0.916477	0.778252	0.725909	0.08	12.05	0.38	0.043	0.257	0.193	1.837	0.1	1.667	219.333	6.667	1	5.667	4.667	41.333	2	NAC098	protein CUP-SHAPED COTYLEDON 2 [Sesamum indicum]	-	-	-	-	GO:0043231//intracellular membrane-bounded organelle	GO:0001071//nucleic acid binding transcription factor activity	GO:0001763//morphogenesis of a branching structure;GO:0003002//regionalization;GO:0003156//regulation of organ formation;GO:0009933//meristem structural organization;GO:0010467//gene expression;GO:0034645//cellular macromolecule biosynthetic process;GO:0048437//floral organ development;GO:0048438//floral whorl development;GO:0048523//negative regulation of cellular process;GO:0048528//post-embryo…
Unigene0019306	0.951507	0.885258	0.850489	22.443	70.547	28.363	16.9	24.467	6.803	13.887	12.573	578.333	1687	645	463	704.667	213	374	332	WRKY33	LOW QUALITY PROTEIN: probable WRKY transcription factor 33 [Sesamum indicum]	Organismal Systems;Environmental Information Processing	Environmental adaptation;Signal transduction	ko04626//Plant-pathogen interaction;ko04016//MAPK signaling pathway - plant	K13424;K13424	-	-	-
Unigene0019349	0.948542	0.855045	0.820184	16.377	71.813	10.23	7.063	10.897	3.883	7.317	5.997	284.333	1124.33	153	130	206.333	79.667	134.333	104	JA2L	NAC domain-containing protein 72 [Sesamum indicum]	-	-	-	-	GO:0043231//intracellular membrane-bounded organelle	GO:0001071//nucleic acid binding transcription factor activity;GO:0046983//protein dimerization activity	GO:0006355//regulation of transcription, DNA-templated;GO:0006605//protein targeting;GO:0006952//defense response;GO:0006972//hyperosmotic response;GO:0009408//response to heat;GO:0009620//response to fungus;GO:0009694//jasmonic acid metabolic process;GO:0009755//hormone-mediated signaling pathway;GO:0009863//salicylic acid mediated signaling pathway;GO:0010260//organ senescence;GO:0035556//intra…
Unigene0019380	0.938688	0.821674	0.77058	0	2.857	0.05	0	0	0	0	0	0	20.333	0.333	0	0	0	0	0	--	-	-	-	-	-	-	-	-
Unigene0019383	0.69505	0.806081	0.790573	0.58	1.703	2.393	1.157	0	0	0	0	3.667	12	16.333	7.667	0	0	0	0	EEF1B2	elongation factor EF-1 beta subunit [Galdieria sulphuraria]	-	-	-	-	GO:0044444//cytoplasmic part	-	-
Unigene0019461	0.859985	0.854539	0.866131	80.767	123.827	16.45	10.253	8.753	1.187	7.45	8.437	2314	3387.33	427.667	292.667	286	42.667	229	254.667	LAC14	laccase 41 [Salvia miltiorrhiza]	-	-	-	-	-	-	GO:0009698//phenylpropanoid metabolic process
Unigene0019686	0.934143	0.815043	0.765016	0	2.587	0	0	0	0	0	0	0	22.667	0	0	0	0	0	0	--	obtusifoliol 14-alpha demethylase-like [Quercus suber]	Metabolism;Metabolism;Metabolism	Global and overview maps;Global and overview maps;Lipid metabolism	ko01100//Metabolic pathways;ko01110//Biosynthesis of secondary metabolites;ko00100//Steroid biosynthesis	K05917;K05917;K05917	-	GO:0003824//catalytic activity	GO:0044238//primary metabolic process;GO:0044710//single-organism metabolic process;GO:0071704//organic substance metabolic process
Unigene0019716	0.668604	0.759702	0.723516	0.203	1.393	2.123	0.813	0	0	0	0	1	7.667	11.333	4.333	0	0	0	0	RpL17	60S ribosomal protein L17-like [Physcomitrella patens]	Genetic Information Processing	Translation	ko03010//Ribosome	K02880	GO:0005911//cell-cell junction;GO:0009536//plastid;GO:0015934//large ribosomal subunit;GO:0031090//organelle membrane;GO:0031224//intrinsic component of membrane	GO:0005198//structural molecule activity;GO:0016787//hydrolase activity	GO:0009451//RNA modification;GO:0016485//protein processing;GO:0071555//cell wall organization
Unigene0019787	0.871646	0.759404	0.711628	10.96	53.197	10.407	1.077	19.27	1.417	6.287	6.67	380.667	1740	322	37.667	761.333	60.667	229	241	RFS2	Galactinol--sucrose galactosyltransferase [Handroanthus impetiginosus]	-	-	-	-	GO:0005911//cell-cell junction	GO:0004557//alpha-galactosidase activity;GO:0008378//galactosyltransferase activity	GO:0006950//response to stress;GO:0009313//oligosaccharide catabolic process;GO:0009628//response to abiotic stimulus
Unigene0019870	0.834807	0.796686	0.758731	6.413	15.097	9	3.763	8.95	1.953	3.293	3.953	307.333	674.333	382.333	191.667	479.333	114.333	163	195	At1g74360	probable LRR receptor-like serine/threonine-protein kinase At1g74360 [Sesamum indicum]	-	-	-	-	GO:0031224//intrinsic component of membrane;GO:0043231//intracellular membrane-bounded organelle	GO:0004672//protein kinase activity;GO:0016787//hydrolase activity;GO:0032550//purine ribonucleoside binding	GO:0002252//immune effector process;GO:0006464//cellular protein modification process;GO:0006605//protein targeting;GO:0006796//phosphate-containing compound metabolic process;GO:0006952//defense response;GO:0007167//enzyme linked receptor protein signaling pathway;GO:0009617//response to bacterium;GO:0009620//response to fungus;GO:0009755//hormone-mediated signaling pathway;GO:0009863//salicylic…
Unigene0020194	0.961735	0.964697	0.917454	0.673	3.33	1.997	0.433	0	0	0	0	9.667	53.333	30.667	6.667	0	0	0	0	THI1	thiamine thiazole synthase [Pyrus ussuriensis x Pyrus communis]	Metabolism;Metabolism	Global and overview maps;Metabolism of cofactors and vitamins	ko01100//Metabolic pathways;ko00730//Thiamine metabolism	K03146;K03146	GO:0009526//plastid envelope;GO:0009532//plastid stroma	GO:0046914//transition metal ion binding;GO:0046983//protein dimerization activity	GO:0005982//starch metabolic process;GO:0005984//disaccharide metabolic process;GO:0006468//protein phosphorylation;GO:0006772//thiamine metabolic process;GO:0009416//response to light stimulus;GO:0009617//response to bacterium;GO:0009893//positive regulation of metabolic process;GO:0018131//oxazole or thiazole biosynthetic process;GO:0033554//cellular response to stress;GO:0043269//regulation of…
Unigene0020300	0.82357	0.863599	0.914911	23.6	34.847	19.573	28.457	9.393	8.32	15.533	11.917	971.667	1323.67	724.667	1250.67	440	415.333	674.667	501.333	AGAL3	Alpha-D-galactosidase (melibiase) [Handroanthus impetiginosus]	Metabolism;Metabolism;Metabolism;Metabolism;Metabolism	Global and overview maps;Lipid metabolism;Carbohydrate metabolism;Lipid metabolism;Glycan biosynthesis and metabolism	ko01100//Metabolic pathways;ko00561//Glycerolipid metabolism;ko00052//Galactose metabolism;ko00600//Sphingolipid metabolism;ko00603//Glycosphingolipid biosynthesis - globo and isoglobo series	K07407;K07407;K07407;K07407;K07407	-	-	-
Unigene0020305	0.853654	0.751535	0.703886	0.303	2.253	0.413	0.72	0.53	0	0.18	0.923	2.333	15.333	2.667	6	4.333	0	1.333	7	--	-	-	-	-	-	-	-	-
Unigene0020325	0.931545	0.849316	0.816587	9.37	29.697	5.67	2.973	6.947	1.61	3.337	4.353	229.667	701.333	127.333	80	198.667	50	88.333	113.667	Os10g0521000	PREDICTED: probable trehalase [Erythranthe guttata]	Metabolism;Metabolism;Metabolism	Global and overview maps;Global and overview maps;Carbohydrate metabolism	ko01100//Metabolic pathways;ko01110//Biosynthesis of secondary metabolites;ko00500//Starch and sucrose metabolism	K01194;K01194;K01194	GO:0016020//membrane	GO:0015927//trehalase activity	GO:0005991//trehalose metabolic process
Unigene0020443	0.934143	0.815043	0.765016	0	2.94	0	0	0	0	0	0	0	21.667	0	0	0	0	0	0	--	-	-	-	-	-	-	-	-
Unigene0020529	0.889729	0.822102	0.771398	5.313	16.29	10.697	5.487	3.26	4.13	9.39	3.49	36	101.667	63.667	40	24	33.667	67.333	24	--	-	-	-	-	-	-	-	-
Unigene0020552	0.938588	0.820431	0.770443	6.057	46.303	5.58	4.6	4.75	4.17	6.26	5.69	174.333	1224.67	143.667	137.333	153	145	189.667	166.667	NYC1	chlorophyll(ide) b reductase [Salvia splendens]	Metabolism;Metabolism;Metabolism	Global and overview maps;Global and overview maps;Metabolism of cofactors and vitamins	ko01100//Metabolic pathways;ko01110//Biosynthesis of secondary metabolites;ko00860//Porphyrin and chlorophyll metabolism	K13606;K13606;K13606	GO:0031224//intrinsic component of membrane;GO:0044434//chloroplast part	GO:0005488//binding;GO:0016616//oxidoreductase activity, acting on the CH-OH group of donors, NAD or NADP as acceptor	GO:0006787//porphyrin-containing compound catabolic process;GO:0044257//cellular protein catabolic process;GO:0044710//single-organism metabolic process
Unigene0020721	0.934111	0.810465	0.757218	0.067	4.82	0.217	0.243	0.063	0.06	0.317	0.333	1	61	2.667	3.667	1	1	4.667	4.667	CYP83B1	cytochrome P450 CYP71AT91 [Salvia miltiorrhiza]	-	-	-	-	-	GO:0016709//oxidoreductase activity, acting on paired donors, with incorporation or reduction of molecular oxygen, NAD(P)H as one donor, and incorporation of one atom of oxygen;GO:0046872//metal ion binding	-
Unigene0020750	0.936963	0.819004	0.779527	7.077	62.563	5.35	8.043	6.63	3.04	7.917	4.453	197.333	1589	134	237.333	206	101.333	236	125.333	PP2A13	COP9 signalosome complex subunit 1 [Salvia splendens]	-	-	-	-	GO:0043231//intracellular membrane-bounded organelle	GO:0005488//binding	GO:0006950//response to stress;GO:0009746//response to hexose;GO:0034285//response to disaccharide
Unigene0020837	0.903728	0.927055	0.929303	143.43	241.433	174.533	128.247	117.62	53.747	91.34	68.497	2127	3374.33	2318.67	2045	1981.67	979	1476.67	1053	HIPP39	heavy metal-associated isoprenylated plant protein 39-like [Coffea arabica]	-	-	-	-	-	GO:0043169//cation binding	-
Unigene0020879	0.636171	0.741682	0.725841	0.197	0.983	1.513	0.847	0	0	0	0	1.667	9.333	13.667	7.667	0	0	0	0	fdl	Beta-hexosaminidase 2 [Dendrobium catenatum]	Metabolism;Metabolism;Metabolism;Metabolism;Metabolism;Metabolism;Metabolism	Global and overview maps;Carbohydrate metabolism;Glycan biosynthesis and metabolism;Glycan biosynthesis and metabolism;Glycan biosynthesis and metabolism;Glycan biosynthesis and metabolism;Glycan biosynthesis and metabolism	ko01100//Metabolic pathways;ko00520//Amino sugar and nucleotide sugar metabolism;ko00513//Various types of N-glycan biosynthesis;ko00511//Other glycan degradation;ko00531//Glycosaminoglycan degradation;ko00603//Glycosphingolipid biosynthesis - globo and isoglobo series;ko00604//Glycosphingolipid biosynthesis - ganglio series	K12373;K12373;K12373;K12373;K12373;K12373;K12373	-	GO:0016787//hydrolase activity	-
Unigene0021227	0.665691	0.784731	0.769822	0.997	2.66	4.047	1.873	0	0	0	0	12.667	37.667	55	25.333	0	0	0	0	AAEL006169	cathepsin D [Capsaspora owczarzaki ATCC 30864]	-	-	-	-	GO:0043231//intracellular membrane-bounded organelle	GO:0016787//hydrolase activity	-
Unigene0021288	0.934143	0.815043	0.765016	0	2.397	0	0	0	0	0	0	0	19.667	0	0	0	0	0	0	--	nitrosoguanidine resistance protein SNG1-like [Quercus suber]	-	-	-	-	-	-	-
Unigene0021314	0.846369	0.753395	0.750155	8.51	17.067	3.763	5.283	6.01	1.073	6.563	5.673	209	401	83.667	142.333	172.667	33	175	147.333	At4g20820	berberine bridge enzyme-like 18 [Sesamum indicum]	-	-	-	-	-	GO:0016614//oxidoreductase activity, acting on CH-OH group of donors	-
Unigene0021315	0.937618	0.81812	0.767273	0.377	38.733	0.957	0.313	0.3	0.15	1.053	0.35	8.667	841.333	20	7.667	8	4.333	25.333	8.333	At4g20820	berberine bridge enzyme-like 18 [Sesamum indicum]	-	-	-	-	-	GO:0016614//oxidoreductase activity, acting on CH-OH group of donors	-
Unigene0021374	0.869619	0.881892	0.892117	2.437	4.67	2.967	3.04	2.5	1	1.313	1.597	36.333	65.333	39.333	47.667	42.333	18.333	20.667	24.667	NAC087	NAC domain-containing protein 92 [Sesamum indicum]	-	-	-	-	GO:0043231//intracellular membrane-bounded organelle	GO:0001071//nucleic acid binding transcription factor activity	GO:0010468//regulation of gene expression;GO:0034645//cellular macromolecule biosynthetic process;GO:0044707//single-multicellular organism process
Unigene0021460	0.86887	0.896392	0.841486	0.377	3.983	3.567	0.933	0	0	0	0	2	23.667	20.667	5.333	0	0	0	0	--	-	-	-	-	-	-	-	-
Unigene0021617	0.9442	0.911766	0.915687	28.897	58.787	18.083	18.72	15.983	7.553	11.25	8.36	1394.33	2567	777	933.667	842.667	433	559.667	404.333	LKR/SDH	saccharopine dehydrogenase (NADP+, L-glutamate forming) [Salvia splendens]	Metabolism;Metabolism;Metabolism	Global and overview maps;Global and overview maps;Amino acid metabolism	ko01100//Metabolic pathways;ko01110//Biosynthesis of secondary metabolites;ko00310//Lysine degradation	K14157;K14157;K14157	GO:0005737//cytoplasm	GO:0004753//saccharopine dehydrogenase activity	GO:0009743//response to carbohydrate;GO:0019477//L-lysine catabolic process
Unigene0021810	0.64779	0.766163	0.792359	0.567	1.387	1.653	1.587	0	0	0	0	2.333	6.333	7.333	7	0	0	0	0	Rps2	ribosomal protein S2 [Capsaspora owczarzaki ATCC 30864]	Genetic Information Processing	Translation	ko03010//Ribosome	K02981	GO:0005911//cell-cell junction;GO:0009536//plastid;GO:0015935//small ribosomal subunit;GO:0016020//membrane;GO:0030312//external encapsulating structure	GO:0003676//nucleic acid binding;GO:0005198//structural molecule activity	GO:0006221//pyrimidine nucleotide biosynthetic process;GO:0009451//RNA modification;GO:0010467//gene expression
Unigene0022001	0.946303	0.828077	0.771497	0.617	19.41	2.097	0.137	0.11	0.79	1.99	0.353	11	330.667	34	2.667	2.333	17.667	39	6.667	EO	PREDICTED: 2-methylene-furan-3-one reductase-like [Ipomoea nil]	-	-	-	-	GO:0009526//plastid envelope	GO:0016628//oxidoreductase activity, acting on the CH-CH group of donors, NAD or NADP as acceptor	GO:0006520//cellular amino acid metabolic process;GO:0006633//fatty acid biosynthetic process;GO:0006732//coenzyme metabolic process;GO:0006778//porphyrin-containing compound metabolic process;GO:0006790//sulfur compound metabolic process;GO:0006796//phosphate-containing compound metabolic process;GO:0008299//isoprenoid biosynthetic process;GO:0034641//cellular nitrogen compound metabolic process…
Unigene0022132	0.989762	0.955046	0.922954	0.187	1.453	0.513	0.363	0	0	0	0	1.667	14.667	5	3.667	0	0	0	0	--	-	-	-	-	-	-	-	-
Unigene0022376	0.958038	0.862678	0.827984	4.557	21.457	5.097	3.873	0.853	2.663	6.1	1.06	117.667	501.667	116.333	105.333	26	81.667	168	27.333	NAC021	NAC domain-containing protein 21/22-like [Sesamum indicum]	-	-	-	-	GO:0043231//intracellular membrane-bounded organelle	GO:0001071//nucleic acid binding transcription factor activity	GO:0003006//developmental process involved in reproduction;GO:0009755//hormone-mediated signaling pathway;GO:0010087//phloem or xylem histogenesis;GO:0010468//regulation of gene expression;GO:0034645//cellular macromolecule biosynthetic process;GO:0048528//post-embryonic root development
Unigene0022441	0.938836	0.828133	0.789043	0.967	13.853	0.503	1.483	0.463	0.87	0.62	0.21	29.333	373.333	13	48	14.667	31	20.667	6.333	CSLG3	cellulose synthase-like protein G3 [Sesamum indicum]	-	-	-	-	-	GO:0016757//transferase activity, transferring glycosyl groups	-
Unigene0022595	0.938178	0.832124	0.792518	2.963	24.697	0.443	0.943	0.853	0.413	0.667	0.94	61.333	455.667	8	21	19.667	10	14.667	19.333	AVT1I	vacuolar amino acid transporter 1 [Sesamum indicum]	-	-	-	-	GO:0016020//membrane	-	GO:0006812//cation transport;GO:0046942//carboxylic acid transport
Unigene0022614	0.907974	0.80277	0.77782	3.533	21.893	4.033	6.507	6.72	2.567	2.707	2.097	56.667	318.333	55.667	112.667	116	49	44	33.667	NAC081	NAC domain-containing protein 2 [Sesamum indicum]	-	-	-	-	GO:0043231//intracellular membrane-bounded organelle	GO:0001071//nucleic acid binding transcription factor activity;GO:0019901//protein kinase binding	GO:0006972//hyperosmotic response;GO:0009314//response to radiation;GO:0009694//jasmonic acid metabolic process;GO:0009787//regulation of abscisic acid-activated signaling pathway;GO:0010243//response to organonitrogen compound;GO:0010467//gene expression;GO:0032535//regulation of cellular component size;GO:0034285//response to disaccharide;GO:0034645//cellular macromolecule biosynthetic process;…
Unigene0022735	0.944578	0.840159	0.779516	0.867	8.483	2.49	0.19	0.063	0.66	2.26	0.197	7.333	65.667	18.333	1.667	0.667	6.667	20.667	1.667	--	late embryogenesis abundant protein At1g64065 [Sesamum indicum]	-	-	-	-	GO:0016020//membrane	-	-
Unigene0022872	0.660312	0.775524	0.748826	0.79	2.18	3.493	1.213	0	0	0	0	4.667	14.333	22.333	7.667	0	0	0	0	rps7	40S ribosomal protein S7-like [Rhodamnia argentea]	Genetic Information Processing	Translation	ko03010//Ribosome	K02993	GO:0009536//plastid;GO:0044391//ribosomal subunit	GO:0003723//RNA binding	GO:0043170//macromolecule metabolic process
Unigene0023200	0.940535	0.853177	0.819848	12.227	53.67	4.577	8.3	2.183	7.673	3.57	6.323	84.333	337.333	27.667	62	17.667	63.667	27.333	44.333	--	hypothetical protein Saspl_019585 [Salvia splendens]	-	-	-	-	-	-	-
Unigene0023682	0.600309	0.705781	0.7011	14.413	15.333	19.097	9.957	10.15	5.233	10.97	8.923	318	317.667	375	228.667	257	140.667	259.333	202.333	--	cotton fiber expressed protein [Gossypium barbadense]	-	-	-	-	-	-	GO:0006812//cation transport
Unigene0023811	0.941393	0.828905	0.796849	7.89	54.413	6.967	12.28	6.58	4.65	9.467	5.123	258.333	1649	202.667	425.333	244	184.667	330.667	171.667	THA1	threonine aldolase [Salvia splendens]	Metabolism;Metabolism;Metabolism;Metabolism	Global and overview maps;Global and overview maps;Global and overview maps;Amino acid metabolism	ko01100//Metabolic pathways;ko01110//Biosynthesis of secondary metabolites;ko01230//Biosynthesis of amino acids;ko00260//Glycine, serine and threonine metabolism	K01620;K01620;K01620;K01620	-	-	-
Unigene0023873	0.935777	0.818834	0.770199	0.043	2.883	0	0	0	0	0	0	0.333	25	0	0	0	0	0	0	faeB-2	probable feruloyl esterase B-2 [Quercus suber]	-	-	-	-	-	-	-
Unigene0023919	0.934143	0.815043	0.765016	0	3.413	0	0	0	0	0	0	0	21.667	0	0	0	0	0	0	chi2	probable chitinase 2 [Rhodamnia argentea]	-	-	-	-	-	-	-
Unigene0024094	0.934143	0.815043	0.765016	0	2.587	0	0	0	0	0	0	0	20	0	0	0	0	0	0	--	-	-	-	-	-	-	-	-
Unigene0024219	0.788843	0.832433	0.86814	11.92	13.407	7.857	5.147	6.083	3.173	5.543	2.68	132	138	79	59.667	75	42.667	64.667	30.333	--	ubiquitin family protein [Striga asiatica]	-	-	-	-	GO:0043231//intracellular membrane-bounded organelle	-	-
Unigene0024316	0.751501	0.850232	0.856091	95.537	116.387	114.46	60.96	64.093	20.293	39.79	43.47	1164.33	1347	1261.33	799	931.333	306.333	527.667	554.333	--	Arrestin domain-containing protein [Actinidia chinensis var. chinensis] [Actinidia chinensis]	-	-	-	-	-	-	-
Unigene0024431	0.955146	0.848023	0.793914	2.01	36.607	5.33	1.733	1.73	2.777	2.403	0.63	81	1358	187.667	71.667	77	136	104	26	DMR6	PREDICTED: LOW QUALITY PROTEIN: 1-aminocyclopropane-1-carboxylate oxidase 5 [Erythranthe guttata]	-	-	-	-	-	GO:0016706//oxidoreductase activity, acting on paired donors, with incorporation or reduction of molecular oxygen, 2-oxoglutarate as one donor, and incorporation of one atom each of oxygen into both donors;GO:0043169//cation binding	GO:0006605//protein targeting;GO:0009617//response to bacterium;GO:0009620//response to fungus;GO:0009696//salicylic acid metabolic process;GO:0009755//hormone-mediated signaling pathway;GO:0009812//flavonoid metabolic process;GO:0009814//defense response, incompatible interaction;GO:0009863//salicylic acid mediated signaling pathway;GO:0010243//response to organonitrogen compound;GO:0033554//cel…
Unigene0024433	0.940099	0.832214	0.786676	5.867	42.917	4.753	1.29	4.313	3.99	3.72	0.583	78.667	532.667	58	19	70	65	53.333	8	HAT22	Transcription factor HEX [Handroanthus impetiginosus]	-	-	-	-	GO:0043231//intracellular membrane-bounded organelle	GO:0001071//nucleic acid binding transcription factor activity;GO:0003677//DNA binding	GO:0009725//response to hormone;GO:0010468//regulation of gene expression;GO:0034645//cellular macromolecule biosynthetic process;GO:0044238//primary metabolic process
Unigene0024540	0.816806	0.892676	0.850466	0.867	2.18	2.34	0.293	0	0	0	0	6.667	16.667	17	2.667	0	0	0	0	RBCS	ribulose bisphosphate carboxylase small chain, chloroplastic-like [Pistacia vera]	Metabolism;Metabolism;Metabolism;Metabolism;Metabolism	Global and overview maps;Global and overview maps;Global and overview maps;Energy metabolism;Carbohydrate metabolism	ko01100//Metabolic pathways;ko01110//Biosynthesis of secondary metabolites;ko01200//Carbon metabolism;ko00710//Carbon fixation in photosynthetic organisms;ko00630//Glyoxylate and dicarboxylate metabolism	K01602;K01602;K01602;K01602;K01602	GO:0005576//extracellular region;GO:0005840//ribosome;GO:0009532//plastid stroma;GO:0042170//plastid membrane;GO:0044434//chloroplast part;GO:0044436//thylakoid part	GO:0016491//oxidoreductase activity;GO:0016831//carboxy-lyase activity;GO:0046914//transition metal ion binding	GO:0006950//response to stress;GO:0009639//response to red or far red light;GO:0015977//carbon fixation;GO:0043094//cellular metabolic compound salvage;GO:0070271//protein complex biogenesis
Unigene0024694	0.934143	0.815043	0.765016	0	3.827	0	0	0	0	0	0	0	22.333	0	0	0	0	0	0	--	synthase of ATP synthase [Thalassiosira pseudonana CCMP1335]	Metabolism;Metabolism	Global and overview maps;Energy metabolism	ko01100//Metabolic pathways;ko00190//Oxidative phosphorylation	K02137;K02137	GO:0009536//plastid;GO:0044455//mitochondrial membrane part	GO:0046914//transition metal ion binding	GO:0006950//response to stress;GO:0015992//proton transport;GO:0042221//response to chemical;GO:0044238//primary metabolic process;GO:0044249//cellular biosynthetic process;GO:0071704//organic substance metabolic process
Unigene0024863	0.610261	0.771231	0.856144	2.94	2.453	2.063	2.35	0.733	0.233	0.34	0.37	21	16	13.333	17.667	6	2	2.667	2.667	--	-	-	-	-	-	-	-	-
Unigene0024879	0.902543	0.775637	0.736906	5.617	28.357	1.75	2.847	4.683	1.24	5.18	4.49	92.667	446.333	26.333	50.333	92	25.667	96.667	78.333	--	Axin-1 like [Actinidia chinensis var. chinensis] [Actinidia chinensis]	-	-	-	-	-	-	-
Unigene0024925	0.695604	0.787786	0.748682	5.87	26.81	39.39	12.29	0	0	0	0	46.333	235.333	334.333	103.333	0	0	0	0	fth1-a	soma ferritin-like [Rhodamnia argentea]	-	-	-	-	GO:0009526//plastid envelope;GO:0009532//plastid stroma;GO:0044434//chloroplast part	GO:0005506//iron ion binding	GO:0000041//transition metal ion transport;GO:0000302//response to reactive oxygen species;GO:0009058//biosynthetic process;GO:0009668//plastid membrane organization;GO:0009725//response to hormone;GO:0010038//response to metal ion;GO:0044237//cellular metabolic process;GO:0048827//phyllome development;GO:0051707//response to other organism;GO:0055076//transition metal ion homeostasis;GO:0090567/…
Unigene0025306	0.882877	0.95167	0.925651	0.997	2.557	2.227	0.713	0	0	0	0	6.667	19	16	5.333	0	0	0	0	SERP2	PREDICTED: probable stress-associated endoplasmic reticulum protein [Musa acuminata subsp. malaccensis] [Musa acuminata]	-	-	-	-	-	-	GO:0006950//response to stress
Unigene0025461	0.934143	0.815043	0.765016	0	2.257	0	0	0	0	0	0	0	19.333	0	0	0	0	0	0	CC1G_04743	tubulin beta chain [Rhodamnia argentea]	Cellular Processes	Transport and catabolism	ko04145//Phagosome	K07375	GO:0015630//microtubule cytoskeleton;GO:0043231//intracellular membrane-bounded organelle;GO:0043234//protein complex	GO:0005198//structural molecule activity;GO:0017111//nucleoside-triphosphatase activity;GO:0032550//purine ribonucleoside binding	GO:0006006//glucose metabolic process;GO:0006996//organelle organization;GO:0007017//microtubule-based process;GO:0043623//cellular protein complex assembly;GO:0051603//proteolysis involved in cellular protein catabolic process
Unigene0025469	0.934143	0.815043	0.765016	0	2.403	0	0	0	0	0	0	0	24	0	0	0	0	0	0	mas5	mitochondrial protein import protein mas5-like [Quercus suber]	Genetic Information Processing	Folding, sorting and degradation	ko04141//Protein processing in endoplasmic reticulum	K09503	GO:0005911//cell-cell junction;GO:0016020//membrane;GO:0044444//cytoplasmic part	GO:0005515//protein binding	GO:0000302//response to reactive oxygen species;GO:0006498//N-terminal protein lipidation;GO:0009642//response to light intensity
Unigene0025499	0.876479	0.746987	0.723273	17.327	72.1	5.34	6.213	7.66	3.003	26.48	1.747	334.667	1338	94.333	128.667	187	72	598.667	35.333	At5g10770	aspartyl protease family protein At5g10770-like [Sesamum indicum]	-	-	-	-	-	-	-
Unigene0025554	0.934143	0.815043	0.765016	0	4.13	0	0	0	0	0	0	0	23.333	0	0	0	0	0	0	syb1	synaptobrevin homolog 1-like [Quercus suber]	Genetic Information Processing	Folding, sorting and degradation	ko04130//SNARE interactions in vesicular transport	K08513	-	-	-
Unigene0025707	0.8208	0.741355	0.773876	4.713	10.197	1.64	5.29	3.773	0.923	3.487	2.16	51.333	101	15.667	61.333	45	12	40.667	23.667	--	Classical arabinogalactan protein [Actinidia chinensis var. chinensis] [Actinidia chinensis]	-	-	-	-	GO:0043231//intracellular membrane-bounded organelle	-	-
Unigene0025737	0.929692	0.805754	0.752128	0.043	5.457	0.1	0.053	0.057	0.113	0.193	0.203	0.667	73.667	1.333	0.667	1	2	3	3	At1g20180	UPF0496 protein At1g20180-like [Sesamum indicum]	-	-	-	-	-	-	-
Unigene0025767	0.934143	0.815043	0.765016	0	3.247	0	0	0	0	0	0	0	25	0	0	0	0	0	0	ENO3	enolase [Selaginella moellendorffii]	Metabolism;Metabolism;Metabolism;Metabolism;Metabolism;Genetic Information Processing	Global and overview maps;Global and overview maps;Global and overview maps;Global and overview maps;Carbohydrate metabolism;Folding, sorting and degradation	ko01100//Metabolic pathways;ko01110//Biosynthesis of secondary metabolites;ko01200//Carbon metabolism;ko01230//Biosynthesis of amino acids;ko00010//Glycolysis / Gluconeogenesis;ko03018//RNA degradation	K01689;K01689;K01689;K01689;K01689;K01689	GO:0005576//extracellular region;GO:0005911//cell-cell junction;GO:0009532//plastid stroma;GO:0016020//membrane;GO:0031967//organelle envelope;GO:0044445//cytosolic part	GO:0003676//nucleic acid binding;GO:0016836//hydro-lyase activity;GO:0046914//transition metal ion binding	GO:0000904//cell morphogenesis involved in differentiation;GO:0001101//response to acid chemical;GO:0006006//glucose metabolic process;GO:0006090//pyruvate metabolic process;GO:0006739//NADP metabolic process;GO:0006970//response to osmotic stress;GO:0009314//response to radiation;GO:0009725//response to hormone;GO:0010038//response to metal ion;GO:0010467//gene expression;GO:0034645//cellular ma…
Unigene0025815	0.869926	0.906822	0.938674	2.003	3.223	1.367	1.733	1.043	0.177	0.31	0.753	15.333	23.333	9.333	13.667	9	1.667	2.667	6	--	hypothetical protein CDL12_30302 [Handroanthus impetiginosus]	-	-	-	-	-	-	-
Unigene0025967	0.656711	0.785297	0.837712	23.153	25.437	25.847	20.243	16.243	4.627	7.497	5.38	250.333	258.333	247.333	235.667	195.667	61	88.667	60	--	zinc-binding family protein [Hibiscus syriacus]	-	-	-	-	GO:0043231//intracellular membrane-bounded organelle;GO:0043232//intracellular non-membrane-bounded organelle	-	GO:0009719//response to endogenous stimulus;GO:0010033//response to organic substance;GO:0035556//intracellular signal transduction
Unigene0025999	0.902989	0.788401	0.761255	0.32	9.96	0.23	2.67	1.13	0.333	0.44	0.643	4	121.333	2.667	37	16.333	5.333	6.333	8.667	PGIP	receptor protein kinase CLAVATA1 [Sesamum indicum]	-	-	-	-	-	-	-
Unigene0026086	0.931143	0.842358	0.8163	14.78	39.737	13.337	12.64	15.927	6.997	10.597	10.237	253.333	630.333	203.333	229.333	306.333	145.333	189.667	179.667	--	Armadillo-like helical [Artemisia annua]	-	-	-	-	-	-	-
Unigene0026833	0.931617	0.827766	0.792424	24.217	106.563	10.727	9.473	16.467	6.67	12.37	10.903	623.333	2564	246.667	251.333	479	210.667	331.667	290.333	At2g25737	sulfite exporter TauE/SafE family protein 3 [Sesamum indicum]	-	-	-	-	GO:0031224//intrinsic component of membrane	GO:0034062//RNA polymerase activity	GO:0009059//macromolecule biosynthetic process
Unigene0027131	0.934143	0.815043	0.765016	0	4.67	0	0	0	0	0	0	0	23.333	0	0	0	0	0	0	--	-	-	-	-	-	-	-	-
Unigene0027431	0.932891	0.835933	0.750374	0.387	4.123	1.703	0.087	0.35	0.307	0.883	0.877	1.667	17.333	6.667	0.333	1.667	1.667	4.333	4	--	-	-	-	-	-	-	-	-
Unigene0027463	0.934143	0.815043	0.765016	0	3.957	0	0	0	0	0	0	0	21.667	0	0	0	0	0	0	--	-	-	-	-	-	-	-	-
Unigene0027788	0.917323	0.812731	0.755334	2.553	25.107	7.35	1.78	7.423	1.563	2.607	1.707	65	583.667	162.333	46	202.667	48	67.333	44	AAE11	Acyl-CoA synthetase [Handroanthus impetiginosus]	-	-	-	-	GO:0042579//microbody	GO:0016405//CoA-ligase activity	GO:0019758//glycosinolate biosynthetic process
Unigene0027898	0.594045	0.736205	0.731242	0.767	1.467	2.64	1.257	0	0	0	0	5	10.667	18.667	8.667	0	0	0	0	--	-	-	-	-	-	-	-	-
Unigene0028125	0.924675	0.937405	0.883113	0.357	2.323	1.7	0.333	0	0	0	0	2.667	19.333	13.667	2.667	0	0	0	0	--	-	-	-	-	-	-	-	-
Unigene0028341	0.975305	0.931559	0.902126	0.743	2.28	0.687	0.39	0.337	0.367	0.153	0.153	18.333	54.333	16.333	11	10	11.333	4	4	CRK29	PREDICTED: cysteine-rich receptor-like protein kinase 29 [Erythranthe guttata]	-	-	-	-	-	GO:0004672//protein kinase activity	GO:0006464//cellular protein modification process;GO:0016310//phosphorylation
Unigene0028558	0.659037	0.80976	0.807178	9.903	12.303	18.917	5.953	0	0	0	0	150	207	301.333	98	0	0	0	0	phc-2	-	-	-	-	-	-	-	-
Unigene0028718	0.962951	0.961152	0.926757	0.347	2.483	1.363	0.757	0	0	0	0	2	16	8.667	4.667	0	0	0	0	lysoz	-	-	-	-	-	-	-	-
Unigene0029131	0.934143	0.815043	0.765016	0	4.047	0	0	0	0	0	0	0	19.333	0	0	0	0	0	0	MIR1	mitochondrial phosphate carrier protein [Chrysochromulina tobinii]	-	-	-	-	GO:0009536//plastid;GO:0030312//external encapsulating structure;GO:0031090//organelle membrane;GO:0031224//intrinsic component of membrane	-	GO:0006796//phosphate-containing compound metabolic process;GO:0006970//response to osmotic stress;GO:0044238//primary metabolic process;GO:0044281//small molecule metabolic process;GO:0044763//single-organism cellular process;GO:0046483//heterocycle metabolic process;GO:1901360//organic cyclic compound metabolic process;GO:1901564//organonitrogen compound metabolic process
Unigene0029140	0.941849	0.83751	0.803919	7.63	63.213	2.263	5.19	4.043	1.507	2.62	0.367	139.333	1086.33	38	105	85	34	51.333	7	PER51	peroxidase 73 precursor [Sesamum indicum]	Metabolism;Metabolism;Metabolism	Global and overview maps;Global and overview maps;Biosynthesis of other secondary metabolites	ko01100//Metabolic pathways;ko01110//Biosynthesis of secondary metabolites;ko00940//Phenylpropanoid biosynthesis	K00430;K00430;K00430	GO:0044424//intracellular part	GO:0003824//catalytic activity;GO:0016209//antioxidant activity;GO:0043169//cation binding;GO:0046906//tetrapyrrole binding	GO:0000041//transition metal ion transport;GO:0001101//response to acid chemical;GO:0006970//response to osmotic stress;GO:0009267//cellular response to starvation;GO:0009755//hormone-mediated signaling pathway;GO:0010053//root epidermal cell differentiation;GO:0015698//inorganic anion transport;GO:0032412//regulation of ion transmembrane transporter activity;GO:0042743//hydrogen peroxide metabol…
Unigene0029476	0.887053	0.752497	0.714739	5.503	40.293	1.673	4.56	9.03	1.623	5.707	4.627	164.667	1133	45.333	146.667	305	59.667	186.333	143.667	TDT	tonoplast dicarboxylate transporter [Citrus clementina]	-	-	-	-	GO:0031090//organelle membrane;GO:0031224//intrinsic component of membrane;GO:0043231//intracellular membrane-bounded organelle	GO:0015556//C4-dicarboxylate transmembrane transporter activity	GO:0015743//malate transport;GO:0030001//metal ion transport;GO:0030641//regulation of cellular pH
Unigene0029543	0.960759	0.890633	0.831759	0.897	5.197	2.133	0.077	0.213	0.33	1.103	0.083	10.667	55.667	21.667	1	2.667	4.667	14	1	CYP71AU50	PREDICTED: cytochrome P450 CYP736A12-like [Erythranthe guttata]	-	-	-	-	-	GO:0016705//oxidoreductase activity, acting on paired donors, with incorporation or reduction of molecular oxygen;GO:0046872//metal ion binding	-
Unigene0029577	0.931245	0.808411	0.75853	0.053	14.177	0.043	0.023	0.14	0.05	0.373	0	1	223	0.667	0.333	3	1	7.333	0	At5g53970	tyrosine aminotransferase 3 [Salvia miltiorrhiza]	Metabolism;Metabolism;Metabolism;Metabolism;Metabolism;Metabolism;Metabolism;Metabolism;Metabolism;Metabolism	Global and overview maps;Global and overview maps;Global and overview maps;Amino acid metabolism;Amino acid metabolism;Amino acid metabolism;Metabolism of cofactors and vitamins;Amino acid metabolism;Biosynthesis of other secondary metabolites;Biosynthesis of other secondary metabolites	ko01100//Metabolic pathways;ko01110//Biosynthesis of secondary metabolites;ko01230//Biosynthesis of amino acids;ko00270//Cysteine and methionine metabolism;ko00350//Tyrosine metabolism;ko00360//Phenylalanine metabolism;ko00130//Ubiquinone and other terpenoid-quinone biosynthesis;ko00400//Phenylalanine, tyrosine and tryptophan biosynthesis;ko00950//Isoquinoline alkaloid biosynthesis;ko00960//Tropa…	K00815;K00815;K00815;K00815;K00815;K00815;K00815;K00815;K00815;K00815	-	GO:0043168//anion binding;GO:0070546//L-phenylalanine aminotransferase activity;GO:0070547//L-tyrosine aminotransferase activity	GO:0019752//carboxylic acid metabolic process
Unigene0029688	0.638623	0.769859	0.763455	1.32	2.91	4.65	2.33	0	0	0	0	6.667	16.333	25	12.667	0	0	0	0	RPS12	40S ribosomal protein S12 [Sphaeroforma arctica JP610]	Genetic Information Processing	Translation	ko03010//Ribosome	K02951	GO:0015935//small ribosomal subunit;GO:0043231//intracellular membrane-bounded organelle	-	GO:0006970//response to osmotic stress;GO:0010038//response to metal ion;GO:0010467//gene expression
Unigene0030005	0.934574	0.815804	0.765629	0	6.587	0.02	0.017	0	0.03	0	0	0	108.667	0.333	0.333	0	0.667	0	0	sol5	uncharacterized FAD-linked oxidoreductase ARB_02372-like [Quercus suber]	-	-	-	-	-	GO:0016491//oxidoreductase activity	-
Unigene0030166	0.658636	0.77531	0.749484	3.343	8.947	14.39	5.027	0	0	0	0	52.667	156.667	243	84	0	0	0	0	mt:CoI	cytochrome c oxidase subunit I, partial [Lingulodinium polyedra]	Metabolism;Metabolism	Global and overview maps;Energy metabolism	ko01100//Metabolic pathways;ko00190//Oxidative phosphorylation	K02256;K02256	GO:0019866//organelle inner membrane;GO:0031224//intrinsic component of membrane;GO:0044455//mitochondrial membrane part	GO:0003824//catalytic activity;GO:0009055//electron carrier activity;GO:0046906//tetrapyrrole binding;GO:0046914//transition metal ion binding	GO:0015992//proton transport;GO:0022904//respiratory electron transport chain
Unigene0030232	0.931076	0.876496	0.880677	39.333	122.317	44.61	68.547	27.533	22.317	37.457	20.39	665.667	1919	685	1265	531.667	458	684.667	353.333	HSP26-A	glutathione S-transferase [Salvia splendens]	Metabolism;Metabolism	Global and overview maps;Metabolism of other amino acids	ko01100//Metabolic pathways;ko00480//Glutathione metabolism	K00799;K00799	-	GO:0003824//catalytic activity	-
Unigene0030519	0.905212	0.846909	0.85213	13.43	24.847	7.503	9.133	9.197	3.96	7.8	6.83	297.333	516.333	150.333	209	229.333	108	184	157	WSD1	O-acyltransferase WSD1 [Striga asiatica]	-	-	-	-	-	GO:0016740//transferase activity	GO:0008610//lipid biosynthetic process
Unigene0030522	0.941509	0.950619	0.952761	1.677	6.87	2.81	3.423	0	0	0	0	15.333	69.667	26.667	33.333	0	0	0	0	TL1	PREDICTED: thaumatin-like protein 1a [Pyrus x bretschneideri]	-	-	-	-	GO:0005576//extracellular region	GO:0008422//beta-glucosidase activity;GO:0019865//immunoglobulin binding	GO:0001906//cell killing;GO:0006950//response to stress;GO:0009620//response to fungus
Unigene0030882	0.982406	0.93938	0.918562	1.173	3.473	1.243	0.687	0.473	0.08	0.647	0.193	15.667	44	15	10.333	7.333	1.333	9.667	2.667	XTH7	Xyloglucan:xyloglucosyl transferase [Handroanthus impetiginosus]	-	-	-	-	GO:0005576//extracellular region;GO:0030312//external encapsulating structure	GO:0016758//transferase activity, transferring hexosyl groups;GO:0016787//hydrolase activity	GO:0006970//response to osmotic stress;GO:0009414//response to water deprivation;GO:0019758//glycosinolate biosynthetic process;GO:0044042//glucan metabolic process;GO:0045229//external encapsulating structure organization;GO:0048509//regulation of meristem development
Unigene0030965	0.619058	0.738972	0.715425	0.937	2.803	4.893	1.917	0	0	0	0	23	76.667	129	50	0	0	0	0	PCK1	phosphoenolpyruvate carboxykinase, cytosolic [GTP]-like [Rhodamnia argentea]	Metabolism;Metabolism;Metabolism;Metabolism;Metabolism	Global and overview maps;Global and overview maps;Carbohydrate metabolism;Carbohydrate metabolism;Carbohydrate metabolism	ko01100//Metabolic pathways;ko01110//Biosynthesis of secondary metabolites;ko00010//Glycolysis / Gluconeogenesis;ko00620//Pyruvate metabolism;ko00020//Citrate cycle (TCA cycle)	K01596;K01596;K01596;K01596;K01596	-	-	-
Unigene0031153	0.934143	0.815043	0.765016	0	3.06	0	0	0	0	0	0	0	20.667	0	0	0	0	0	0	Rv1533	Nitronate monooxygenase [Hondaea fermentalgiana]	-	-	-	-	-	GO:0003824//catalytic activity	GO:0008152//metabolic process;GO:0050896//response to stimulus
Unigene0031353	0.912989	0.944416	0.896588	0.247	1.01	0.79	0.143	0	0	0	0	1.667	7.667	5.667	1	0	0	0	0	Sftpb	-	-	-	-	-	-	-	-
Unigene0031718	0.908172	0.805592	0.795173	3.937	9.597	3.833	4.207	3.123	2.113	5.163	2.37	200.667	450.333	175.333	227.333	175	129.667	274.667	122.667	--	D-inositol 3-phosphate glycosyltransferase [Actinidia chinensis var. chinensis] [Actinidia chinensis]	-	-	-	-	GO:0031984//organelle subcompartment;GO:0043231//intracellular membrane-bounded organelle	GO:0003824//catalytic activity	GO:0009247//glycolipid biosynthetic process
Unigene0031724	0.718965	0.794739	0.757953	0.117	1.147	1.51	0.643	0	0	0	0	1	11	13.667	5.667	0	0	0	0	AGAP009593	carboxypeptidase A1 [Capsaspora owczarzaki ATCC 30864]	-	-	-	-	-	-	-
Unigene0031759	0.934143	0.815043	0.765016	0	3.6	0	0	0	0	0	0	0	25.333	0	0	0	0	0	0	apdF	aspyridones efflux protein apdF-like [Quercus suber]	-	-	-	-	-	-	-
Unigene0031770	0.621693	0.723707	0.76743	0.29	0.78	0.743	1.033	0	0	0	0	2.333	7	6.333	9.333	0	0	0	0	CAS1	L-3-cyanoalanine synthase 1 [Pyrus ussuriensis x Pyrus communis]	Metabolism;Metabolism;Metabolism;Metabolism;Metabolism;Metabolism;Metabolism	Global and overview maps;Global and overview maps;Global and overview maps;Global and overview maps;Amino acid metabolism;Metabolism of other amino acids;Energy metabolism	ko01100//Metabolic pathways;ko01110//Biosynthesis of secondary metabolites;ko01200//Carbon metabolism;ko01230//Biosynthesis of amino acids;ko00270//Cysteine and methionine metabolism;ko00460//Cyanoamino acid metabolism;ko00920//Sulfur metabolism	K13034;K13034;K13034;K13034;K13034;K13034;K13034	-	-	-
Unigene0031885	0.934143	0.815043	0.765016	0	3.38	0	0	0	0	0	0	0	22	0	0	0	0	0	0	--	cytochrome P450 monooxygenase FUM15-like [Quercus suber]	-	-	-	-	-	-	-
Unigene0032101	0.936641	0.817356	0.775242	4.71	44.237	3.137	2.497	3.43	1.047	5.683	1.42	59.667	535.667	36.333	33.667	50.333	16.667	77	19	At5g01610	exocyst complex component SEC15B-like isoform X1 [Hibiscus syriacus]	-	-	-	-	GO:0009536//plastid;GO:0031090//organelle membrane	-	GO:0048588//developmental cell growth
Unigene0032202	0.934143	0.815043	0.765016	0	2.19	0	0	0	0	0	0	0	22.333	0	0	0	0	0	0	GRP2	ketoreductase azaE-like [Quercus suber]	-	-	-	-	-	-	-
Unigene0032250	0.931585	0.826496	0.768652	0.457	5.293	1.273	1.4	0.517	1.343	0.707	0.927	11	123	29	38.333	15.667	40.667	19	23.667	NAT6	solute carrier family 23 (nucleobase transporter), member 1/2 [Salvia splendens]	-	-	-	-	-	-	GO:0044763//single-organism cellular process;GO:0051234//establishment of localization
Unigene0032269	0.934143	0.815043	0.765016	0	3.18	0	0	0	0	0	0	0	21.667	0	0	0	0	0	0	--	-	-	-	-	-	-	-	-
Unigene0032460	0.945687	0.847007	0.815307	3.533	14.49	2.363	2.977	2.617	1.12	2.28	2.453	139	528.667	83.667	123	116.333	53.667	94	99	OTU9	OTU (ovarian tumor)-like cysteine protease [Handroanthus impetiginosus]	-	-	-	-	-	-	GO:0050896//response to stimulus
Unigene0032684	0.944372	0.830692	0.779973	0.687	4.397	0.8	0.383	0.7	0.373	0.693	0.48	16	97.667	17	9.333	19	10.667	17.333	11.667	BGLU41	beta-glucosidase 41 [Dorcoceras hygrometricum]	-	-	-	-	GO:0005576//extracellular region;GO:0005618//cell wall;GO:0009536//plastid	GO:0015926//glucosidase activity	GO:0044238//primary metabolic process
Unigene0032773	0.760709	0.829787	0.776227	0.223	1.097	1.32	0.427	0.08	0	0	0.223	1.667	7.333	8.667	3	0.667	0	0	1.667	--	tropomyosin [Rhodamnia argentea]	-	-	-	-	-	-	-
Unigene0032846	0.948174	0.945908	0.910706	5.973	11.877	6.63	5.513	3.067	2.79	3.027	5.793	175	330.667	180.667	166.333	103.333	101.667	98	177.667	GT-2	trihelix transcription factor GT-2-like [Sesamum indicum]	-	-	-	-	-	GO:0000975//regulatory region DNA binding	-
Unigene0032924	0.583696	0.71886	0.700541	0.733	1.59	3.057	1.147	0	0	0	0	16.333	39.667	72.667	27.333	0	0	0	0	Chia	probable chitinase 2 [Rhodamnia argentea]	Metabolism;Metabolism	Global and overview maps;Carbohydrate metabolism	ko01100//Metabolic pathways;ko00520//Amino sugar and nucleotide sugar metabolism	K01183;K01183	-	-	-
Unigene0033119	0.938621	0.821575	0.770497	0	3.307	0.057	0	0	0	0	0	0	20.333	0.333	0	0	0	0	0	RPS1	40S ribosomal S3a-2 isoform A [Chlorella sorokiniana]	Genetic Information Processing	Translation	ko03010//Ribosome	K02984	-	-	-
Unigene0033262	0.934143	0.815043	0.765016	0	2.793	0	0	0	0	0	0	0	19.333	0	0	0	0	0	0	--	-	-	-	-	-	-	-	-
Unigene0033316	0.740739	0.828123	0.789625	0.527	2.047	2.707	0.81	0	0	0	0	4.333	18.667	24	7	0	0	0	0	mt:ND1	NADH dehydrogenase subunit 1 [Pleurocladia lacustris]	Metabolism;Metabolism	Global and overview maps;Energy metabolism	ko01100//Metabolic pathways;ko00190//Oxidative phosphorylation	K03878;K03878	GO:0044455//mitochondrial membrane part	GO:0050136//NADH dehydrogenase (quinone) activity	GO:0022904//respiratory electron transport chain
Unigene0033352	0.988569	0.970992	0.956732	0.987	3.173	0.9	0.65	0	0	0	0	7	25	6.667	5	0	0	0	0	ELIP1	PREDICTED: early light-induced protein 1, chloroplastic-like [Pyrus x bretschneideri]	-	-	-	-	GO:0034357//photosynthetic membrane;GO:0044425//membrane part;GO:0044434//chloroplast part	GO:0046906//tetrapyrrole binding	GO:0009408//response to heat;GO:0009637//response to blue light;GO:0009644//response to high light intensity;GO:0009813//flavonoid biosynthetic process;GO:0010029//regulation of seed germination;GO:0010114//response to red light;GO:0010218//response to far red light;GO:0034285//response to disaccharide;GO:0034644//cellular response to UV;GO:0090056//regulation of chlorophyll metabolic process
Unigene0033446	0.938991	0.822122	0.770955	0	2.673	0.05	0	0	0	0	0	0	19.333	0.333	0	0	0	0	0	MEL	PREDICTED: alpha-galactosidase isoform X2 [Vitis vinifera]	Metabolism;Metabolism;Metabolism;Metabolism;Metabolism	Global and overview maps;Lipid metabolism;Carbohydrate metabolism;Lipid metabolism;Glycan biosynthesis and metabolism	ko01100//Metabolic pathways;ko00561//Glycerolipid metabolism;ko00052//Galactose metabolism;ko00600//Sphingolipid metabolism;ko00603//Glycosphingolipid biosynthesis - globo and isoglobo series	K07407;K07407;K07407;K07407;K07407	-	-	-
Unigene0033814	0.875204	0.741911	0.712635	15.373	89.71	14.013	13.417	6.33	3.09	40.45	2.62	190.333	1003.33	155.667	179.667	93.667	45	556	32.333	TRY	PREDICTED: MYB-like transcription factor ETC3 [Erythranthe guttata]	-	-	-	-	GO:0043231//intracellular membrane-bounded organelle	GO:0005515//protein binding	GO:0003002//regionalization;GO:0003006//developmental process involved in reproduction;GO:0006355//regulation of transcription, DNA-templated;GO:0006970//response to osmotic stress;GO:0009787//regulation of abscisic acid-activated signaling pathway;GO:0010061//regulation of trichoblast fate specification;GO:0010090//trichome morphogenesis;GO:0010454//negative regulation of cell fate commitment;GO…
Unigene0033909	0.595338	0.733015	0.811709	41.923	35.777	33.693	30.883	16.873	19.227	26.203	14.193	918.667	727	662.667	705.333	418.333	506	603.333	315.667	BBX22	B-box zinc finger protein 22 [Sesamum indicum]	-	-	-	-	GO:0016604//nuclear body	GO:0005488//binding	GO:0006605//protein targeting;GO:0006779//porphyrin-containing compound biosynthetic process;GO:0006952//defense response;GO:0006970//response to osmotic stress;GO:0009639//response to red or far red light;GO:0009657//plastid organization;GO:0009755//hormone-mediated signaling pathway;GO:0009813//flavonoid biosynthetic process;GO:0009863//salicylic acid mediated signaling pathway;GO:0010468//regu…
Unigene0033988	0.93703	0.82182	0.7779	8.743	64.053	7.58	8.457	8.937	6.503	7.483	6.44	230	1564.67	179.333	237.667	270	209	212.333	174.333	SGR	PREDICTED: protein STAY-GREEN, chloroplastic-like [Nicotiana sylvestris]	Metabolism;Metabolism	Global and overview maps;Metabolism of cofactors and vitamins	ko01110//Biosynthesis of secondary metabolites;ko00860//Porphyrin and chlorophyll metabolism	K22013;K22013	GO:0009536//plastid	-	GO:0090056//regulation of chlorophyll metabolic process
Unigene0034136	0.745688	0.832267	0.796226	0.807	3.267	4.233	1.417	0	0	0	0	5.333	24	30	10.333	0	0	0	0	Tctp	translationally-controlled tumor protein homolog [Rhodamnia argentea]	-	-	-	-	GO:0016020//membrane;GO:0043231//intracellular membrane-bounded organelle;GO:0044444//cytoplasmic part	-	GO:0000278//mitotic cell cycle;GO:0000904//cell morphogenesis involved in differentiation;GO:0003006//developmental process involved in reproduction;GO:0006950//response to stress;GO:0009725//response to hormone;GO:0009791//post-embryonic development;GO:0010035//response to inorganic substance;GO:0016049//cell growth;GO:0040008//regulation of growth;GO:0048364//root development;GO:0051128//regula…
Unigene0034232	0.793861	0.849597	0.80055	1.237	2.48	2.633	0.54	0.783	0.48	0.617	0.42	10	19.667	19.667	4.667	7.667	5	5.667	3.667	ERF091	EREBP-like factor [Salvia splendens]	-	-	-	-	GO:0043231//intracellular membrane-bounded organelle	GO:0001071//nucleic acid binding transcription factor activity;GO:0003676//nucleic acid binding	GO:0000160//phosphorelay signal transduction system;GO:0006950//response to stress;GO:0009628//response to abiotic stimulus;GO:0009755//hormone-mediated signaling pathway;GO:0010243//response to organonitrogen compound;GO:0010468//regulation of gene expression;GO:0034645//cellular macromolecule biosynthetic process;GO:0044238//primary metabolic process;GO:1901700//response to oxygen-containing co…
Unigene0034323	0.762408	0.854831	0.83442	0.313	1.073	1.28	0.613	0	0	0	0	1.667	6.333	7.333	4	0	0	0	0	MSRB5	PREDICTED: peptide methionine sulfoxide reductase B5-like [Pyrus x bretschneideri]	-	-	-	-	GO:0009532//plastid stroma	GO:0016671//oxidoreductase activity, acting on a sulfur group of donors, disulfide as acceptor;GO:0043169//cation binding	GO:0000097//sulfur amino acid biosynthetic process;GO:0000302//response to reactive oxygen species;GO:0009247//glycolipid biosynthetic process;GO:0009267//cellular response to starvation;GO:0009409//response to cold;GO:0009414//response to water deprivation;GO:0044267//cellular protein metabolic process
Unigene0034457	0.743373	0.818714	0.786813	0.207	1.533	1.883	0.88	0	0	0	0	1.333	11	13.333	6	0	0	0	0	--	-	-	-	-	-	-	-	-
Unigene0034497	0.934143	0.815043	0.765016	0	2.967	0	0	0	0	0	0	0	24.667	0	0	0	0	0	0	--	Lysozyme [Tetrabaena socialis]	-	-	-	-	-	-	-
Unigene0034752	0.911824	0.815131	0.802928	112.013	253.553	69.25	73.427	74.367	37.607	102.393	58.287	4402	9416.67	2482	3033	3337.67	1835	4297.67	2394.67	RD21B	low-temperature-induced cysteine proteinase [Sesamum indicum]	-	-	-	-	GO:0043231//intracellular membrane-bounded organelle	GO:0004175//endopeptidase activity;GO:0004620//phospholipase activity;GO:0016628//oxidoreductase activity, acting on the CH-CH group of donors, NAD or NADP as acceptor	GO:0019538//protein metabolic process;GO:0044710//single-organism metabolic process
Unigene0034770	0.923289	0.819258	0.798521	12.783	42.243	13.053	13.053	7.21	7.2	19.017	4.83	229	689.333	207.667	250	147	154	361.333	87.333	--	PREDICTED: cinnamoyl-CoA reductase 1-like [Erythranthe guttata]	-	-	-	-	-	GO:0016616//oxidoreductase activity, acting on the CH-OH group of donors, NAD or NADP as acceptor	GO:0008202//steroid metabolic process
Unigene0034821	0.894388	0.759104	0.708857	7.267	98.173	7.56	6.647	21.693	4.193	10.027	9.967	85	1081.67	79.333	79	295	60.667	128.667	121.667	AZF2	zinc finger protein AZF2-like [Sesamum indicum]	-	-	-	-	GO:0043231//intracellular membrane-bounded organelle	GO:0000975//regulatory region DNA binding	GO:0001101//response to acid chemical;GO:0003006//developmental process involved in reproduction;GO:0006355//regulation of transcription, DNA-templated;GO:0006972//hyperosmotic response;GO:0007165//signal transduction;GO:0009725//response to hormone;GO:0010243//response to organonitrogen compound
Unigene0034993	0.97672	0.984361	0.979701	1.44	3.81	1.743	1.377	0.32	0.253	0.393	0.127	22.333	53.667	24.333	22.667	5.667	4.667	6.333	2	--	-	-	-	-	-	-	-	-
Unigene0035005	0.934143	0.815043	0.765016	0	2.837	0	0	0	0	0	0	0	25.667	0	0	0	0	0	0	roqT	MFS gliotoxin efflux transporter gliA-like [Quercus suber]	-	-	-	-	-	-	-
Unigene0035064	0.93913	0.820157	0.772665	1.13	34.357	1.737	2.42	0.983	1.217	2.177	1.047	28.667	800.667	38.333	66	27.667	37.333	60.667	27	DTX33	multidrug resistance protein, MATE family [Salvia splendens]	-	-	-	-	GO:0009536//plastid;GO:0031090//organelle membrane;GO:0031224//intrinsic component of membrane	GO:0015291//secondary active transmembrane transporter activity;GO:0016778//diphosphotransferase activity;GO:0032550//purine ribonucleoside binding	GO:0001101//response to acid chemical;GO:0006796//phosphate-containing compound metabolic process;GO:0006972//hyperosmotic response;GO:0009694//jasmonic acid metabolic process;GO:0009755//hormone-mediated signaling pathway;GO:0010053//root epidermal cell differentiation;GO:0015893//drug transport;GO:0051707//response to other organism
Unigene0035176	0.680143	0.816175	0.803848	1.29	2.033	3.063	0.98	0	0	0	0	32.667	57.333	81.333	26.333	0	0	0	0	phc-2	-	-	-	-	-	-	-	-
Unigene0035303	0.667265	0.774488	0.800611	2.757	7.713	8.37	8.64	0	0	0	0	12.667	39	40.667	45	0	0	0	0	MT2	PREDICTED: metallothionein-like protein type 3 [Pyrus x bretschneideri]	-	-	-	-	-	GO:0046914//transition metal ion binding	GO:0006605//protein targeting;GO:0006970//response to osmotic stress;GO:0007275//multicellular organism development;GO:0009653//anatomical structure morphogenesis;GO:0009746//response to hexose;GO:0009891//positive regulation of biosynthetic process;GO:0010038//response to metal ion;GO:0032535//regulation of cellular component size;GO:0042044//fluid transport;GO:0043067//regulation of programmed …

## Sheet: KEGG enrichment
#KEGG enrichment of 277 tanshinone accumulation-related DEGs
id	num	qvalue	per	ratio	class	ID	Descrption	Pvalue	Qvalue	Up	Down	fg_num	bg_num
Glycosphingolipid biosynthesis - globo and isoglobo series	3	0.0356916	4.478	0.125	Metabolism	ko00603	Glycosphingolipid biosynthesis - globo and isoglobo series	0.000735892	0.0356916	0	0	3	24
Biosynthesis of secondary metabolites	26	0.0356916	38.806	0.013	Metabolism	ko01110	Biosynthesis of secondary metabolites	0.00115134	0.0356916	0	0	26	1941
Ubiquinone and other terpenoid-quinone biosynthesis	4	0.0427069	5.97	0.054	Metabolism	ko00130	Ubiquinone and other terpenoid-quinone biosynthesis	0.00226824	0.0427069	0	0	4	74
Galactose metabolism	4	0.0427069	5.97	0.048	Metabolism	ko00052	Galactose metabolism	0.00344411	0.0427069	0	0	4	83
Metabolic pathways	41	0.0427069	61.194	0.01	Metabolism	ko01100	Metabolic pathways	0.00320309	0.0427069	0	0	41	3911
Cysteine and methionine metabolism	6	0.0680626	8.955	0.027	Metabolism	ko00270	Cysteine and methionine metabolism	0.0065867	0.0680626	0	0	6	224
Glucosinolate biosynthesis	2	0.0859959	2.985	0.1	Metabolism	ko00966	Glucosinolate biosynthesis	0.00970922	0.0859959	0	0	2	20
Phenylalanine, tyrosine and tryptophan biosynthesis	3	0.130068	4.478	0.042	Metabolism	ko00400	Phenylalanine, tyrosine and tryptophan biosynthesis	0.016783	0.130068	0	0	3	72
Valine, leucine and isoleucine biosynthesis	2	0.143134	2.985	0.062	Metabolism	ko00290	Valine, leucine and isoleucine biosynthesis	0.0239225	0.143134	0	0	2	32
Valine, leucine and isoleucine degradation	4	0.143134	5.97	0.028	Metabolism	ko00280	Valine, leucine and isoleucine degradation	0.0218965	0.143134	0	0	4	142
Biosynthesis of amino acids	8	0.143134	11.94	0.017	Metabolism	ko01230	Biosynthesis of amino acids	0.0253947	0.143134	0	0	8	475
MAPK signaling pathway - plant	6	0.171233	8.955	0.019	Environmental Information Processing	ko04016	MAPK signaling pathway - plant	0.0331418	0.171233	0	0	6	321
Tropane, piperidine and pyridine alkaloid biosynthesis	2	0.222657	2.985	0.043	Metabolism	ko00960	Tropane, piperidine and pyridine alkaloid biosynthesis	0.046686	0.222657	0	0	2	46
Pantothenate and CoA biosynthesis	2	0.240094	2.985	0.04	Metabolism	ko00770	Pantothenate and CoA biosynthesis	0.0542148	0.240094	0	0	2	50
Sphingolipid metabolism	2	0.282421	2.985	0.035	Metabolism	ko00600	Sphingolipid metabolism	0.0683277	0.282421	0	0	2	57
Glycine, serine and threonine metabolism	3	0.282575	4.478	0.023	Metabolism	ko00260	Glycine, serine and threonine metabolism	0.0729226	0.282575	0	0	3	129
SNARE interactions in vesicular transport	2	0.302148	2.985	0.031	Genetic Information Processing	ko04130	SNARE interactions in vesicular transport	0.0857478	0.302148	0	0	2	65
Isoquinoline alkaloid biosynthesis	2	0.302148	2.985	0.029	Metabolism	ko00950	Isoquinoline alkaloid biosynthesis	0.0925938	0.302148	0	0	2	68
Oxidative phosphorylation	6	0.302148	8.955	0.015	Metabolism	ko00190	Oxidative phosphorylation	0.0886711	0.302148	0	0	6	412
Porphyrin and chlorophyll metabolism	2	0.308742	2.985	0.028	Metabolism	ko00860	Porphyrin and chlorophyll metabolism	0.0995942	0.308742	0	0	2	71
Phenylalanine metabolism	2	0.358486	2.985	0.025	Metabolism	ko00360	Phenylalanine metabolism	0.121423	0.358486	0	0	2	80
Ribosome	10	0.385987	14.925	0.011	Genetic Information Processing	ko03010	Ribosome	0.136963	0.385987	0	0	10	903
Glycosphingolipid biosynthesis - ganglio series	1	0.391644	1.493	0.048	Metabolism	ko00604	Glycosphingolipid biosynthesis - ganglio series	0.146814	0.391644	0	0	1	21
Glyoxylate and dicarboxylate metabolism	3	0.391644	4.478	0.017	Metabolism	ko00630	Glyoxylate and dicarboxylate metabolism	0.151604	0.391644	0	0	3	179
Glycosaminoglycan degradation	1	0.46579	1.493	0.032	Metabolism	ko00531	Glycosaminoglycan degradation	0.209048	0.46579	0	0	1	31
Nicotinate and nicotinamide metabolism	1	0.46579	1.493	0.03	Metabolism	ko00760	Nicotinate and nicotinamide metabolism	0.220947	0.46579	0	0	1	33
Zeatin biosynthesis	1	0.46579	1.493	0.03	Metabolism	ko00908	Zeatin biosynthesis	0.220947	0.46579	0	0	1	33
2-Oxocarboxylic acid metabolism	2	0.46579	2.985	0.019	Metabolism	ko01210	2-Oxocarboxylic acid metabolism	0.192309	0.46579	0	0	2	107
Tyrosine metabolism	2	0.46579	2.985	0.018	Metabolism	ko00350	Tyrosine metabolism	0.208773	0.46579	0	0	2	113
Alanine, aspartate and glutamate metabolism	2	0.46579	2.985	0.017	Metabolism	ko00250	Alanine, aspartate and glutamate metabolism	0.225382	0.46579	0	0	2	119
Amino sugar and nucleotide sugar metabolism	3	0.472709	4.478	0.013	Metabolism	ko00520	Amino sugar and nucleotide sugar metabolism	0.237491	0.472709	0	0	3	224
Plant-pathogen interaction	5	0.472709	7.463	0.011	Organismal Systems	ko04626	Plant-pathogen interaction	0.243979	0.472709	0	0	5	446
Thiamine metabolism	1	0.476347	1.493	0.025	Metabolism	ko00730	Thiamine metabolism	0.261222	0.476347	0	0	1	40
Glycerolipid metabolism	2	0.476347	2.985	0.015	Metabolism	ko00561	Glycerolipid metabolism	0.256067	0.476347	0	0	2	130
Other glycan degradation	1	0.506516	1.493	0.022	Metabolism	ko00511	Other glycan degradation	0.288727	0.506516	0	0	1	45
Steroid biosynthesis	1	0.506516	1.493	0.022	Metabolism	ko00100	Steroid biosynthesis	0.294106	0.506516	0	0	1	46
Plant hormone signal transduction	3	0.54232	4.478	0.011	Environmental Information Processing	ko04075	Plant hormone signal transduction	0.323642	0.54232	0	0	3	266
Sulfur metabolism	1	0.57218	1.493	0.018	Metabolism	ko00920	Sulfur metabolism	0.350691	0.57218	0	0	1	57
Phenylpropanoid biosynthesis	2	0.600733	2.985	0.011	Metabolism	ko00940	Phenylpropanoid biosynthesis	0.377881	0.600733	0	0	2	174
Lysine degradation	1	0.622758	1.493	0.014	Metabolism	ko00310	Lysine degradation	0.40733	0.622758	0	0	1	69
Cyanoamino acid metabolism	1	0.622758	1.493	0.014	Metabolism	ko00460	Cyanoamino acid metabolism	0.411824	0.622758	0	0	1	70
Various types of N-glycan biosynthesis	1	0.643806	1.493	0.013	Metabolism	ko00513	Various types of N-glycan biosynthesis	0.446588	0.643806	0	0	1	78
Ascorbate and aldarate metabolism	1	0.643806	1.493	0.012	Metabolism	ko00053	Ascorbate and aldarate metabolism	0.467279	0.643806	0	0	1	83
Pyruvate metabolism	2	0.643806	2.985	0.01	Metabolism	ko00620	Pyruvate metabolism	0.443742	0.643806	0	0	2	199
Starch and sucrose metabolism	2	0.643806	2.985	0.01	Metabolism	ko00500	Starch and sucrose metabolism	0.466539	0.643806	0	0	2	208
Carbon metabolism	5	0.6632	7.463	0.008	Metabolism	ko01200	Carbon metabolism	0.492052	0.6632	0	0	5	612
Propanoate metabolism	1	0.701904	1.493	0.01	Metabolism	ko00640	Propanoate metabolism	0.532089	0.701904	0	0	1	100
Pyrimidine metabolism	1	0.709934	1.493	0.01	Metabolism	ko00240	Pyrimidine metabolism	0.549626	0.709934	0	0	1	105
Inositol phosphate metabolism	1	0.725141	1.493	0.009	Metabolism	ko00562	Inositol phosphate metabolism	0.573096	0.725141	0	0	1	112
Arginine and proline metabolism	1	0.727521	1.493	0.008	Metabolism	ko00330	Arginine and proline metabolism	0.59225	0.727521	0	0	1	118
Photosynthesis	1	0.727521	1.493	0.008	Metabolism	ko00195	Photosynthesis	0.598445	0.727521	0	0	1	120
Citrate cycle (TCA cycle)	1	0.757443	1.493	0.007	Metabolism	ko00020	Citrate cycle (TCA cycle)	0.642042	0.757443	0	0	1	135
Phosphatidylinositol signaling system	1	0.757443	1.493	0.007	Environmental Information Processing	ko04070	Phosphatidylinositol signaling system	0.647491	0.757443	0	0	1	137
Glycolysis / Gluconeogenesis	2	0.770084	2.985	0.007	Metabolism	ko00010	Glycolysis / Gluconeogenesis	0.670718	0.770084	0	0	2	303
Peroxisome	1	0.801842	1.493	0.006	Cellular Processes	ko04146	Peroxisome	0.711311	0.801842	0	0	1	163
Glutathione metabolism	1	0.820868	1.493	0.005	Metabolism	ko00480	Glutathione metabolism	0.75061	0.820868	0	0	1	182
Purine metabolism	1	0.820868	1.493	0.005	Metabolism	ko00230	Purine metabolism	0.761888	0.820868	0	0	1	188
RNA degradation	1	0.820868	1.493	0.005	Genetic Information Processing	ko03018	RNA degradation	0.772663	0.820868	0	0	1	194
Carbon fixation in photosynthetic organisms	1	0.820868	1.493	0.005	Metabolism	ko00710	Carbon fixation in photosynthetic organisms	0.789564	0.820868	0	0	1	204
Phagosome	1	0.820868	1.493	0.005	Cellular Processes	ko04145	Phagosome	0.794388	0.820868	0	0	1	207
RNA transport	1	0.946775	1.493	0.003	Genetic Information Processing	ko03013	RNA transport	0.931504	0.946775	0	0	1	348
Protein processing in endoplasmic reticulum	1	0.979809	1.493	0.002	Genetic Information Processing	ko04141	Protein processing in endoplasmic reticulum	0.979809	0.979809	0	0	1	502
