# Supplementary material for: Comparative transcriptome analyses of different Salvia miltiorrhiza varieties during the accumulation of tanshinones
Source: PeerJ. 2021 Oct 20;9:e12300. doi: 10.7717/peerj.12300 (PMC8541307; doi:10.7717/peerj.12300)
Supplement: Supplemental Information 18 [file peerj-09-12300-s018.xlsx]

## Sheet: PCR raw data
ISGP	qRT-PCR	SE	RNA-Seq		HMGS	qRT-PCR	SE	RNA-Seq		CYP76AH1	qRT-PCR	SE	RNA-Seq		MYB36	qRT-PCR	SE	RNA-Seq
SC	2.52851	0.231134	180.343		SC	1.12999	0.10074	54.567		SC	0.53071	0.06409	949.853		SC	16.7388	1.41299	32.253
YN	1.00144	0.0665055	46.503		YN	1.01333	0.19422	130.637		YN	1.01278	0.19027	168.733		YN	1.00096	0.05426	2.237
SX	0.0960792	0.0189695	91.41		SX	0.0917211	0.00858	38.237		SX	0.02773	0.00265	373.667		SX	10.0722	0.000668789	14.793
HN	0.21546	0.0230842	75.2		HN	0.0951858	0.03582	51.757		HN	0.02056	0.00559	303.747		HN	9.02497	0.00669	9.857
HMGR2	qRT-PCR	SE	RNA-Seq		CPS	qRT-PCR	SE	RNA-Seq		CYP76AK5	qRT-PCR	SE	RNA-Seq
SC	0.656789	0.0726	58.663		SC	6.21629	0.50983	339.697		SC	3.2513	0.14454	275.977
YN	1.00035	0.03238	116.567		YN	1.00395	0.10789	50.317		YN	1.00094	0.0525	55.683
SX	0.0243746	0.00183	105.223		SX	1.73869	0.26397	168.643		SX	1.40995	0.09665	150.843
HN	0.0448333	0.0121	91.1		HN	1.51548	0.34333	116.573		HN	1.17837	0.04526	143.263
HMGR3	qRT-PCR	SE	RNA-Seq		DXS	qRT-PCR	SE	RNA-Seq		MYC	qRT-PCR	SE	RNA-Seq
SC	8.41819	0.8877	46.517		SC	6.64687	0.71477	397.047		SC	1.30724	0.2417	42.75
YN	1.03092	0.26096	3.35		YN	1.0057	0.13346	60.563		YN	1.00828	0.15391	29.12
SX	9.64571	2.49966	47.16		SX	0.849459	0.13246	161.11		SX	0.388183	0.30186	26.507
HN	13.4563	3.91736	37.29		HN	1.42255	0.10597	96.987		HN	0.0623231	0.04712	29.823
